# Supplementary material
Source: publisher figshare collection journal article supplement (https://acs.figshare.com/ndownloader/files/31150822)
Supplement: Supplementary file 1 [file 31150822]

## Sheet: endocytosis total proteins
Table S3. Original proteomics data on the cellular response after endocytosis of two AuNPs.
Protein IDs	Majority protein IDs	Peptide counts (all)	Peptide counts (razor+unique)	Peptide counts (unique)	Protein names	Gene names	Fasta headers	Number of proteins	Peptides	Razor + unique peptides	Unique peptides	Peptides 1A (10nm AuNPs-1)	Peptides 1B (10nm AuNPs-2)	Peptides 5A (50nm AuNPs-1)	Peptides 5B (50nm AuNPs-2)	Peptides NA (Ctrl-1)	Peptides NB (Ctrl-2)	Razor + unique peptides 1A (10nm AuNPs-1)	Razor + unique peptides 1B (10nm AuNPs-2)	Razor + unique peptides 5A (50nm AuNPs-1)	Razor + unique peptides 5B (50nm AuNPs-2)	Razor + unique peptides NA (Ctrl-1)	Razor + unique peptides NB (Ctrl-2)	Unique peptides 1A (10nm AuNPs-1)	Unique peptides 1B (10nm AuNPs-2)	Unique peptides 5A (50nm AuNPs-1)	Unique peptides 5B (50nm AuNPs-2)	Unique peptides NA (Ctrl-1)	Unique peptides NB (Ctrl-2)	Sequence coverage [%]	Unique + razor sequence coverage [%]	Unique sequence coverage [%]	Mol. weight [kDa]	Sequence length	Sequence lengths	Fraction average	Fraction 1	Fraction 2	Fraction 3	Fraction 4	Fraction 5	Fraction 6	Fraction 7	Fraction 8	Fraction 9	Fraction 10	Experiment 1A (10nm AuNPs-1)	Experiment 1B (10nm AuNPs-2)	Experiment 5A (50nm AuNPs-1)
A0A024R7E8;K7EN05;P60002;K7EPC8;K7EQ44;K7EMV4	A0A024R7E8;K7EN05;P60002;K7EPC8;K7EQ44;K7EMV4	2;1;1;1;1;1	2;1;1;1;1;1	2;1;1;1;1;1	Transcription elongation factor 1 homolog	ELOF1	>tr|A0A024R7E8|A0A024R7E8_HUMAN Elongation factor 1 homolog (S. cerevisiae), isoform CRA_a OS=Homo sapiens GN=ELOF1 PE=4 SV=1;>tr|K7EN05|K7EN05_HUMAN Transcription elongation factor 1 homolog OS=Homo sapiens GN=ELOF1 PE=4 SV=1;>sp|P60002|ELOF1_HUMAN Transc	6	2	2	2	2	2	2	1	1	2	2	2	2	1	1	2	2	2	2	1	1	2	35.6	35.6	35.6	11.723	104	104;76;83;90;114;120	5.62					6	10					2	4	4
A0AV96-2;A0AV96;D6R9D6;B7Z8Z7;D6RBS9;D6REZ6;D6R9M7;D6RBP6;D6RA49;D6RFL5;D6RCT1;Q5T0W7;Q8TBY0-2;Q8TBY0-3;Q9NQ94-5;Q8TBY0;Q9NQ94-6;Q9NQ94-3;Q9NQ94-2;F8W9F8;Q9NQ94-4;Q9NQ94	A0AV96-2;A0AV96;D6R9D6;B7Z8Z7;D6RBS9;D6REZ6	13;13;12;12;8;7;5;4;4;4;1;1;1;1;1;1;1;1;1;1;1;1	13;13;12;12;8;7;5;4;4;4;1;1;1;1;1;1;1;1;1;1;1;1	13;13;12;12;8;7;5;4;4;4;1;1;1;1;1;1;1;1;1;1;1;1	RNA-binding protein 47	RBM47	>sp|A0AV96-2|RBM47_HUMAN Isoform 2 of RNA-binding protein 47 OS=Homo sapiens GN=RBM47;>sp|A0AV96|RBM47_HUMAN RNA-binding protein 47 OS=Homo sapiens GN=RBM47 PE=1 SV=2;>tr|D6R9D6|D6R9D6_HUMAN RNA-binding protein 47 OS=Homo sapiens GN=RBM47 PE=4 SV=1;>tr|B7Z	22	13	13	13	13	13	13	13	13	13	13	13	13	13	13	13	13	13	13	13	13	13	28.6	28.6	28.6	56.919	524	524;593;393;555;217;193;158;113;123;137;59;201;470;485;510;533;539;569;586;587;594;594	4.57	15	29	26	22	21	7	2	4	14	15	25	26	29
A0AVT1;A0AVT1-2;H0Y8S8;A0AVT1-3;A0AVT1-4	A0AVT1;A0AVT1-2	34;25;12;9;8	34;25;12;9;8	34;25;12;9;8	Ubiquitin-like modifier-activating enzyme 6	UBA6	>sp|A0AVT1|UBA6_HUMAN Ubiquitin-like modifier-activating enzyme 6 OS=Homo sapiens GN=UBA6 PE=1 SV=1;>sp|A0AVT1-2|UBA6_HUMAN Isoform 2 of Ubiquitin-like modifier-activating enzyme 6 OS=Homo sapiens GN=UBA6	5	34	34	34	32	31	27	29	30	32	32	31	27	29	30	32	32	31	27	29	30	32	42	42	42	117.97	1052	1052;578;271;389;340	5.93	14	41	44	31	14	24	28	32	56	40	53	58	53
A0JLT2-2;J3KR33;A0JLT2	A0JLT2-2;J3KR33;A0JLT2	1;1;1	1;1;1	1;1;1	Mediator of RNA polymerase II transcription subunit 19	MED19	>sp|A0JLT2-2|MED19_HUMAN Isoform 2 of Mediator of RNA polymerase II transcription subunit 19 OS=Homo sapiens GN=MED19;>tr|J3KR33|J3KR33_HUMAN Mediator of RNA polymerase II transcription subunit 19 OS=Homo sapiens GN=MED19 PE=1 SV=1;>sp|A0JLT2|MED19_HUMAN M	3	1	1	1	0	0	1	1	1	1	0	0	1	1	1	1	0	0	1	1	1	1	12.4	12.4	12.4	20.431	194	194;244;244	8.75								1	3				1
A0MZ66;A0MZ66-3;A0MZ66-5;A0MZ66-6;A0MZ66-4;A0MZ66-8;A0MZ66-2;A0MZ66-7	A0MZ66;A0MZ66-3;A0MZ66-5;A0MZ66-6;A0MZ66-4;A0MZ66-8;A0MZ66-2	14;14;13;13;12;11;10;5	14;14;13;13;12;11;10;5	14;14;13;13;12;11;10;5	Shootin-1	KIAA1598	>sp|A0MZ66|SHOT1_HUMAN Shootin-1 OS=Homo sapiens GN=KIAA1598 PE=1 SV=4;>sp|A0MZ66-3|SHOT1_HUMAN Isoform 3 of Shootin-1 OS=Homo sapiens GN=KIAA1598;>sp|A0MZ66-5|SHOT1_HUMAN Isoform 5 of Shootin-1 OS=Homo sapiens GN=KIAA1598;>sp|A0MZ66-6|SHOT1_HUMAN Isoform	8	14	14	14	13	14	13	13	14	14	13	14	13	13	14	14	13	14	13	13	14	14	24.1	24.1	24.1	71.639	631	631;649;571;601;558;498;456;219	6.5	6	18	1	2	9	7	25	30	23	7	21	24	24
A0PJW6	A0PJW6	3	3	3	Transmembrane protein 223	TMEM223	>sp|A0PJW6|TM223_HUMAN Transmembrane protein 223 OS=Homo sapiens GN=TMEM223 PE=1 SV=1	1	3	3	3	1	3	2	2	3	3	1	3	2	2	3	3	1	3	2	2	3	3	22.3	22.3	22.3	22.049	202	202	6.6				1	8	1			1	4	1	4	2
E7EUW5;H0Y8W5;A1A4S6	E7EUW5;H0Y8W5;A1A4S6	3;3;3	3;3;3	3;3;3	Rho GTPase-activating protein 10	ARHGAP10	>tr|E7EUW5|E7EUW5_HUMAN Rho GTPase-activating protein 10 OS=Homo sapiens GN=ARHGAP10 PE=4 SV=1;>tr|H0Y8W5|H0Y8W5_HUMAN Rho GTPase-activating protein 10 (Fragment) OS=Homo sapiens GN=ARHGAP10 PE=4 SV=1;>sp|A1A4S6|RHG10_HUMAN Rho GTPase-activating protein 10	3	3	3	3	2	2	2	2	1	2	2	2	2	2	1	2	2	2	2	2	1	2	9.1	9.1	9.1	42.551	384	384;413;786	4		6	6				3	1	1		3	3	3
A1L0T0;M0R026;E9PJS0;E9PL44;M0QZX5;M0R1B5;E9PNL1	A1L0T0;M0R026	18;14;8;6;5;4;1	18;14;8;6;5;4;1	18;14;8;6;5;4;1	Acetolactate synthase-like protein	ILVBL	>sp|A1L0T0|ILVBL_HUMAN Acetolactate synthase-like protein OS=Homo sapiens GN=ILVBL PE=1 SV=2;>tr|M0R026|M0R026_HUMAN Acetolactate synthase-like protein OS=Homo sapiens GN=ILVBL PE=1 SV=1	7	18	18	18	16	17	12	15	14	15	16	17	12	15	14	15	16	17	12	15	14	15	39.9	39.9	39.9	67.867	632	632;525;262;166;229;165;52	6.09		19	29	31	14	12	7	10	28	36	36	34	28
D6RE10;D6RBR5;D6RBM2;A1L3X0	D6RE10;D6RBR5;D6RBM2;A1L3X0	2;2;2;2	2;2;2;2	2;2;2;2	Elongation of very long chain fatty acids protein 7	ELOVL7	>tr|D6RE10|D6RE10_HUMAN Elongation of very long chain fatty acids protein 7 OS=Homo sapiens GN=ELOVL7 PE=4 SV=1;>tr|D6RBR5|D6RBR5_HUMAN Elongation of very long chain fatty acids protein OS=Homo sapiens GN=ELOVL7 PE=3 SV=1;>tr|D6RBM2|D6RBM2_HUMAN Elongation	4	2	2	2	1	2	2	2	2	2	1	2	2	2	2	2	1	2	2	2	2	2	25.4	25.4	25.4	8.2937	71	71;88;165;281	4.42			6	1		4	1				2	2	2
Q99798;A2A274	Q99798;A2A274	25;25	25;25	25;25	Aconitate hydratase, mitochondrial	ACO2	>sp|Q99798|ACON_HUMAN Aconitate hydratase, mitochondrial OS=Homo sapiens GN=ACO2 PE=1 SV=2;>tr|A2A274|A2A274_HUMAN Aconitate hydratase, mitochondrial OS=Homo sapiens GN=ACO2 PE=1 SV=1	2	25	25	25	24	24	21	22	23	22	24	24	21	22	23	22	24	24	21	22	23	22	44	44	44	85.424	780	780;805	4.84	11	44	50	35	15	31	30	34	14	4	42	43	46
A2A2D0;P16949;P16949-2;E5RGX5;Q93045;Q93045-2	A2A2D0;P16949;P16949-2	4;4;4;1;1;1	4;4;4;1;1;1	4;4;4;1;1;1	Stathmin	STMN1	>tr|A2A2D0|A2A2D0_HUMAN Stathmin (Fragment) OS=Homo sapiens GN=STMN1 PE=1 SV=2;>sp|P16949|STMN1_HUMAN Stathmin OS=Homo sapiens GN=STMN1 PE=1 SV=3;>sp|P16949-2|STMN1_HUMAN Isoform 2 of Stathmin OS=Homo sapiens GN=STMN1	6	4	4	4	4	4	3	3	4	4	4	4	3	3	4	4	4	4	3	3	4	4	42.4	42.4	42.4	9.7931	85	85;149;174;168;179;187	5.6	4	1	7	18	6		2	13	10	1	12	13	7
Q86X10-3;A2A2E9;Q86X10;Q86X10-4;Q86X10-2;A2A2F0;B4E2E8	Q86X10-3;A2A2E9;Q86X10;Q86X10-4;Q86X10-2;A2A2F0;B4E2E8	7;7;7;5;5;5;4	7;7;7;5;5;5;4	7;7;7;5;5;5;4	Ral GTPase-activating protein subunit beta	RALGAPB	>sp|Q86X10-3|RLGPB_HUMAN Isoform 3 of Ral GTPase-activating protein subunit beta OS=Homo sapiens GN=RALGAPB;>tr|A2A2E9|A2A2E9_HUMAN Ral GTPase-activating protein subunit beta OS=Homo sapiens GN=RALGAPB PE=1 SV=1;>sp|Q86X10|RLGPB_HUMAN Ral GTPase-activating	7	7	7	7	5	7	5	7	5	7	5	7	5	7	5	7	5	7	5	7	5	7	6.3	6.3	6.3	166.4	1490	1490;1491;1494;963;1273;1323;477	9.35						2	2		14	25	6	8	6
Q9Y672;A2A2G4;S4R350	Q9Y672;A2A2G4;S4R350	3;3;2	3;3;2	3;3;2	Dolichyl pyrophosphate Man9GlcNAc2 alpha-1,3-glucosyltransferase	ALG6	>sp|Q9Y672|ALG6_HUMAN Dolichyl pyrophosphate Man9GlcNAc2 alpha-1,3-glucosyltransferase OS=Homo sapiens GN=ALG6 PE=1 SV=1;>tr|A2A2G4|A2A2G4_HUMAN Dolichyl pyrophosphate Man9GlcNAc2 alpha-1,3-glucosyltransferase OS=Homo sapiens GN=ALG6 PE=4 SV=1;>tr|S4R350|S	3	3	3	3	3	3	3	3	3	3	3	3	3	3	3	3	3	3	3	3	3	3	5.7	5.7	5.7	58.18	507	507;509;281	5.93		6	6				3	6	3	4	4	4	5
P04156-2;A2A2V1;P04156;X6RKS3	P04156-2;A2A2V1;P04156;X6RKS3	2;2;2;1	2;2;2;1	2;2;2;1	Major prion protein	PRNP	>sp|P04156-2|PRIO_HUMAN Isoform 2 of Major prion protein OS=Homo sapiens GN=PRNP;>tr|A2A2V1|A2A2V1_HUMAN Major prion protein (Fragment) OS=Homo sapiens GN=PRNP PE=3 SV=1;>sp|P04156|PRIO_HUMAN Major prion protein OS=Homo sapiens GN=PRNP PE=1 SV=1;>tr|X6RKS3	4	2	2	2	2	2	2	2	2	2	2	2	2	2	2	2	2	2	2	2	2	2	9.8	9.8	9.8	26.885	246	246;249;253;217	3.25		2	18	7	1						6	5	5
A2A2V2;P42696;H7C5M1;Q5TCT4;P42696-2	A2A2V2;P42696;H7C5M1;Q5TCT4;P42696-2	2;2;1;1;1	2;2;1;1;1	2;2;1;1;1	RNA-binding protein 34	RBM34	>tr|A2A2V2|A2A2V2_HUMAN RNA-binding protein 34 (Fragment) OS=Homo sapiens GN=RBM34 PE=1 SV=1;>sp|P42696|RBM34_HUMAN RNA-binding protein 34 OS=Homo sapiens GN=RBM34 PE=1 SV=2;>tr|H7C5M1|H7C5M1_HUMAN RNA-binding protein 34 (Fragment) OS=Homo sapiens GN=RBM34	5	2	2	2	1	1	1	2	0	0	1	1	1	2	0	0	1	1	1	2	0	0	4.7	4.7	4.7	45.917	408	408;430;86;211;225	8.4		1								4	1	1	1
A2A376;B3KWW1;O95786-2;O95786;F5H5W6	A2A376;B3KWW1;O95786-2;O95786;F5H5W6	5;5;5;5;3	5;5;5;5;3	5;5;5;5;3	Probable ATP-dependent RNA helicase DDX58	DDX58	>tr|A2A376|A2A376_HUMAN Probable ATP-dependent RNA helicase DDX58 OS=Homo sapiens GN=DDX58 PE=1 SV=1;>tr|B3KWW1|B3KWW1_HUMAN Probable ATP-dependent RNA helicase DDX58 OS=Homo sapiens GN=DDX58 PE=1 SV=1;>sp|O95786-2|DDX58_HUMAN Isoform 2 of Probable ATP-dep	5	5	5	5	5	5	3	3	3	4	5	5	3	3	3	4	5	5	3	3	3	4	8.4	8.4	8.4	82.612	722	722;854;880;925;536	4.48	9			7	3					6	6	5	4
P35611-2;E7EV99;A2A3N8;E7ENY0;P35611;P35611-3;P35611-4;H0Y9H2;D6RJE2;D6RAH3;D6RF25;H0YFD8;P35612-2;P35612-8;P35612-9;P35612-4;P35612-3;P35612	P35611-2;E7EV99;A2A3N8;E7ENY0;P35611;P35611-3;P35611-4;H0Y9H2	11;11;11;11;11;11;10;8;2;2;2;1;1;1;1;1;1;1	11;11;11;11;11;11;10;8;2;2;2;1;1;1;1;1;1;1	11;11;11;11;11;11;10;8;2;2;2;1;1;1;1;1;1;1	Alpha-adducin	ADD1	>sp|P35611-2|ADDA_HUMAN Isoform 2 of Alpha-adducin OS=Homo sapiens GN=ADD1;>tr|E7EV99|E7EV99_HUMAN Alpha-adducin OS=Homo sapiens GN=ADD1 PE=1 SV=1;>tr|A2A3N8|A2A3N8_HUMAN Adducin 1 (Alpha) OS=Homo sapiens GN=ADD1 PE=1 SV=1;>tr|E7ENY0|E7ENY0_HUMAN Alpha-add	18	11	11	11	11	10	10	11	9	11	11	10	10	11	9	11	11	10	10	11	9	11	25.5	25.5	25.5	69.984	631	631;632;662;663;737;768;662;444;69;137;142;105;559;574;575;587;643;726	4.74	6	5	20	35	21	1	5	7	7	5	20	20	16
A2A3Z5;Q8IV20	A2A3Z5;Q8IV20	1;1	1;1	1;1	Laccase domain-containing protein 1	LACC1	>tr|A2A3Z5|A2A3Z5_HUMAN Laccase domain-containing protein 1 (Fragment) OS=Homo sapiens GN=LACC1 PE=4 SV=1;>sp|Q8IV20|LACC1_HUMAN Laccase domain-containing protein 1 OS=Homo sapiens GN=LACC1 PE=1 SV=1	2	1	1	1	1	1	0	1	1	0	1	1	0	1	1	0	1	1	0	1	1	0	7.3	7.3	7.3	18.668	164	164;430	9									4		1	1
O15533-2;O15533;D3YTI9;A2AB90;O15533-3;C9JA35;O15533-4	O15533-2;O15533;D3YTI9;A2AB90;O15533-3;C9JA35;O15533-4	6;6;6;6;6;3;3	6;6;6;6;6;3;3	6;6;6;6;6;3;3	Tapasin	TAPBP	>sp|O15533-2|TPSN_HUMAN Isoform 2 of Tapasin OS=Homo sapiens GN=TAPBP;>sp|O15533|TPSN_HUMAN Tapasin OS=Homo sapiens GN=TAPBP PE=1 SV=1;>tr|D3YTI9|D3YTI9_HUMAN Tapasin OS=Homo sapiens GN=TAPBP PE=1 SV=1;>tr|A2AB90|A2AB90_HUMAN Tapasin OS=Homo sapiens GN=TAP	7	6	6	6	4	5	6	6	5	5	4	5	6	6	5	5	4	5	6	6	5	5	15	15	15	43.885	412	412;448;448;466;504;192;361	7.48	4				1	2	7	1	11	7	5	5	6
A2AE48;Q12899;A2AE51;Q5SPU2	A2AE48;Q12899;A2AE51	4;4;3;1	4;4;3;1	4;4;3;1	Tripartite motif-containing protein 26	TRIM26	>tr|A2AE48|A2AE48_HUMAN Tripartite motif-containing protein 26 (Fragment) OS=Homo sapiens GN=TRIM26 PE=4 SV=1;>sp|Q12899|TRI26_HUMAN Tripartite motif-containing protein 26 OS=Homo sapiens GN=TRIM26 PE=2 SV=1;>tr|A2AE51|A2AE51_HUMAN Tripartite motif-contain	4	4	4	4	4	4	4	4	4	3	4	4	4	4	4	3	4	4	4	4	4	3	19	19	19	28.666	248	248;539;159;157	6.36		6		3	11	2			2	12	5	6	7
P10321;A2AEA2;Q31612	P10321;A2AEA2;Q31612	4;4;2	1;1;0	1;1;0	HLA class I histocompatibility antigen, Cw-7 alpha chain;HLA class I histocompatibility antigen, B-73 alpha chain	HLA-C;HLA-B	>sp|P10321|1C07_HUMAN HLA class I histocompatibility antigen, Cw-7 alpha chain OS=Homo sapiens GN=HLA-C PE=1 SV=3;>tr|A2AEA2|A2AEA2_HUMAN HLA class I histocompatibility antigen, Cw-14 alpha chain OS=Homo sapiens GN=HLA-C PE=3 SV=2;>sp|Q31612|1B73_HUMAN HLA	3	4	1	1	4	4	4	4	4	4	1	1	1	1	1	1	1	1	1	1	1	1	15	4.4	4.4	40.648	366	366;372;363	2		11									2	2	2
A2IBA6;Q8WWY8	A2IBA6;Q8WWY8	3;3	3;3	3;3	Lipase member H	LIPH	>tr|A2IBA6|A2IBA6_HUMAN Lipase member H OS=Homo sapiens GN=LIPH PE=2 SV=1;>sp|Q8WWY8|LIPH_HUMAN Lipase member H OS=Homo sapiens GN=LIPH PE=1 SV=1	2	3	3	3	2	2	2	2	1	1	2	2	2	2	1	1	2	2	2	2	1	1	9.1	9.1	9.1	47.202	417	417;451	6.87		1			1	4	6			3	3	3	4
A2RRP1;A2RRP1-2;H0Y5G7;H7BZR3;H7C007;H7C1Y9	A2RRP1;A2RRP1-2;H0Y5G7	21;20;14;4;2;1	21;20;14;4;2;1	21;20;14;4;2;1	Neuroblastoma-amplified sequence	NBAS	>sp|A2RRP1|NBAS_HUMAN Neuroblastoma-amplified sequence OS=Homo sapiens GN=NBAS PE=1 SV=2;>sp|A2RRP1-2|NBAS_HUMAN Isoform 2 of Neuroblastoma-amplified sequence OS=Homo sapiens GN=NBAS;>tr|H0Y5G7|H0Y5G7_HUMAN Neuroblastoma-amplified sequence (Fragment) OS=Ho	6	21	21	21	21	20	19	21	18	19	21	20	19	21	18	19	21	20	19	21	18	19	9.8	9.8	9.8	268.57	2371	2371;2251;1419;184;171;137	5.91		12	20	46	24	20	10	10	28	23	36	32	36
A2RU67	A2RU67	2	2	2	Uncharacterized protein KIAA1467	KIAA1467	>sp|A2RU67|K1467_HUMAN Uncharacterized protein KIAA1467 OS=Homo sapiens GN=KIAA1467 PE=1 SV=1	1	2	2	2	2	2	1	1	1	1	2	2	1	1	1	1	2	2	1	1	1	1	3.9	3.9	3.9	67.038	622	622	3		2	5	2							2	2	1
A2RUC4;A2RUC4-2	A2RUC4;A2RUC4-2	5;3	5;3	5;3	tRNA wybutosine-synthesizing protein 5	TYW5	>sp|A2RUC4|TYW5_HUMAN tRNA wybutosine-synthesizing protein 5 OS=Homo sapiens GN=TYW5 PE=1 SV=1;>sp|A2RUC4-2|TYW5_HUMAN Isoform 2 of tRNA wybutosine-synthesizing protein 5 OS=Homo sapiens GN=TYW5	2	5	5	5	3	3	4	3	1	2	3	3	4	3	1	2	3	3	4	3	1	2	15.9	15.9	15.9	36.547	315	315;152	5.86	8				1		1	1	5	5	4	4	5
A3KFL4;Q13868;Q13868-2;A3KFL2;A3KFL5;A3KFL1	A3KFL4;Q13868;Q13868-2;A3KFL2;A3KFL5;A3KFL1	6;6;5;5;4;3	6;6;5;5;4;3	6;6;5;5;4;3	Exosome complex component RRP4	EXOSC2	>tr|A3KFL4|A3KFL4_HUMAN Exosome complex component RRP4 OS=Homo sapiens GN=EXOSC2 PE=1 SV=1;>sp|Q13868|EXOS2_HUMAN Exosome complex component RRP4 OS=Homo sapiens GN=EXOSC2 PE=1 SV=2;>sp|Q13868-2|EXOS2_HUMAN Isoform 2 of Exosome complex component RRP4 OS=Hom	6	6	6	6	6	6	6	6	6	6	6	6	6	6	6	6	6	6	6	6	6	6	30.8	30.8	30.8	29.408	263	263;293;267;285;237;200	6.3		6	2	6	11	17	5		12	8	14	14	8
A3KMH1-3;A3KMH1;A3KMH1-2	A3KMH1-3;A3KMH1;A3KMH1-2	35;35;28	35;35;28	35;35;28	von Willebrand factor A domain-containing protein 8	VWA8	>sp|A3KMH1-3|VWA8_HUMAN Isoform 3 of von Willebrand factor A domain-containing protein 8 OS=Homo sapiens GN=VWA8;>sp|A3KMH1|VWA8_HUMAN von Willebrand factor A domain-containing protein 8 OS=Homo sapiens GN=VWA8 PE=1 SV=2;>sp|A3KMH1-2|VWA8_HUMAN Isoform 2 o	3	35	35	35	31	31	30	26	25	26	31	31	30	26	25	26	31	31	30	26	25	26	21.4	21.4	21.4	210.92	1872	1872;1905;1039	5.83	6	15	31	48	34	10	11	35	43	15	49	46	42
A3KN83-3;A3KN83-2;A3KN83;A3KN83-4;Q9Y2G9-3;K7ES28;Q9Y2G9	A3KN83-3;A3KN83-2;A3KN83;A3KN83-4	13;13;13;9;2;2;2	13;13;13;9;2;2;2	13;13;13;9;2;2;2	Protein strawberry notch homolog 1	SBNO1	>sp|A3KN83-3|SBNO1_HUMAN Isoform 3 of Protein strawberry notch homolog 1 OS=Homo sapiens GN=SBNO1;>sp|A3KN83-2|SBNO1_HUMAN Isoform 2 of Protein strawberry notch homolog 1 OS=Homo sapiens GN=SBNO1;>sp|A3KN83|SBNO1_HUMAN Protein strawberry notch homolog 1 OS	7	13	13	13	10	9	9	10	7	9	10	9	9	10	7	9	10	9	9	10	7	9	11.4	11.4	11.4	154.06	1391	1391;1392;1393;732;1309;1356;1366	5.22	59	15	14	32	23	30	14	27	38	22	36	39	49
A4D1E9;A4D1E9-2;C9J8R7;C9JNI1;C9JEQ8	A4D1E9;A4D1E9-2;C9J8R7;C9JNI1	13;9;7;7;6	13;9;7;7;6	13;9;7;7;6	GTP-binding protein 10	GTPBP10	>sp|A4D1E9|GTPBA_HUMAN GTP-binding protein 10 OS=Homo sapiens GN=GTPBP10 PE=1 SV=1;>sp|A4D1E9-2|GTPBA_HUMAN Isoform 2 of GTP-binding protein 10 OS=Homo sapiens GN=GTPBP10;>tr|C9J8R7|C9J8R7_HUMAN GTP-binding protein 10 (Fragment) OS=Homo sapiens GN=GTPBP10	5	13	13	13	12	12	13	12	13	12	12	12	13	12	13	12	12	12	13	12	13	12	41.6	41.6	41.6	42.932	387	387;308;210;236;242	6.78	6	3	3	8	18	19	12	24	34	7	24	22	24
Q9UM22;A4D1W8;Q9UM22-3;Q9UM22-2;D6RIH7	Q9UM22;A4D1W8;Q9UM22-3	3;3;2;1;1	3;3;2;1;1	3;3;2;1;1	Mammalian ependymin-related protein 1	EPDR1;UCC1	>sp|Q9UM22|EPDR1_HUMAN Mammalian ependymin-related protein 1 OS=Homo sapiens GN=EPDR1 PE=1 SV=2;>tr|A4D1W8|A4D1W8_HUMAN Ependymin related protein 1 (Zebrafish), isoform CRA_b OS=Homo sapiens GN=UCC1 PE=4 SV=1;>sp|Q9UM22-3|EPDR1_HUMAN Isoform 3 of Mammalian	5	3	3	3	3	3	2	2	3	2	3	3	2	2	3	2	3	3	2	2	3	2	12.9	12.9	12.9	25.437	224	224;344;163;90;122	7.76				1	5				7	4	4	4	2
E9PHI4;O94901-9;A4D2Q0;H0Y6N5;O94901-5;H0Y742;O94901-8;O94901;E7EP45;O94901-6;H7C3X3;H7C2K3;O94901-2;O94901-7;O94901-3	E9PHI4;O94901-9;A4D2Q0;H0Y6N5;O94901-5;H0Y742;O94901-8;O94901;E7EP45;O94901-6	5;5;5;4;4;4;4;4;3;3;2;2;1;1;1	5;5;5;4;4;4;4;4;3;3;2;2;1;1;1	5;5;5;4;4;4;4;4;3;3;2;2;1;1;1	SUN domain-containing protein 1	SUN1;UNC84A	>tr|E9PHI4|E9PHI4_HUMAN SUN domain-containing protein 1 OS=Homo sapiens GN=SUN1 PE=1 SV=1;>sp|O94901-9|SUN1_HUMAN Isoform 9 of SUN domain-containing protein 1 OS=Homo sapiens GN=SUN1;>tr|A4D2Q0|A4D2Q0_HUMAN SUN domain-containing protein 1 OS=Homo sapiens G	15	5	5	5	3	4	3	4	1	5	3	4	3	4	1	5	3	4	3	4	1	5	9.1	9.1	9.1	91.112	822	822;916;974;634;702;710;785;812;583;682;158;427;257;278;341	4.08		4	7	9	2		1	3			5	5	3
A4FUP2;H0YEJ9;P28347;H0YE88;H0YGS2;H0YG62;Q15561-3;Q53GI4;Q15561;Q15562;Q15562-2;M0R1T9;E9PKB7	A4FUP2;H0YEJ9;P28347;H0YE88;H0YGS2;H0YG62;Q15561-3;Q53GI4;Q15561;Q15562;Q15562-2;M0R1T9	3;3;3;3;2;2;2;2;2;2;2;2;1	3;3;3;3;2;2;2;2;2;2;2;2;1	1;1;1;1;0;0;0;0;0;0;0;0;1	Transcriptional enhancer factor TEF-1;Transcriptional enhancer factor TEF-3;Transcriptional enhancer factor TEF-4	TEAD1;TEAD4;TEAD2	>tr|A4FUP2|A4FUP2_HUMAN TEAD1 protein OS=Homo sapiens GN=TEAD1 PE=2 SV=1;>tr|H0YEJ9|H0YEJ9_HUMAN Transcriptional enhancer factor TEF-1 OS=Homo sapiens GN=TEAD1 PE=4 SV=1;>sp|P28347|TEAD1_HUMAN Transcriptional enhancer factor TEF-1 OS=Homo sapiens GN=TEAD1	13	3	3	1	3	2	3	3	2	3	3	2	3	3	2	3	1	0	1	1	0	1	6.7	6.7	3.4	39.999	357	357;368;426;426;175;189;391;434;434;447;450;451;330	7.83						1	12	16	6	1	7	6	6
F5H4Q5;A5D8V6	F5H4Q5;A5D8V6	1;1	1;1	1;1	Vacuolar protein sorting-associated protein 37C	VPS37C	>tr|F5H4Q5|F5H4Q5_HUMAN Vacuolar protein sorting-associated protein 37C (Fragment) OS=Homo sapiens GN=VPS37C PE=1 SV=1;>sp|A5D8V6|VP37C_HUMAN Vacuolar protein sorting-associated protein 37C OS=Homo sapiens GN=VPS37C PE=1 SV=2	2	1	1	1	1	1	1	1	1	1	1	1	1	1	1	1	1	1	1	1	1	1	8.1	8.1	8.1	17.143	148	148;355	3.8			2	8							2	2	2
K7EPK8;K7EN59;B4DXT0;A5D8V7	K7EPK8;K7EN59;B4DXT0;A5D8V7	1;1;1;1	1;1;1;1	1;1;1;1	Coiled-coil domain-containing protein 151	CCDC151	>tr|K7EPK8|K7EPK8_HUMAN Coiled-coil domain-containing protein 151 OS=Homo sapiens GN=CCDC151 PE=4 SV=1;>tr|K7EN59|K7EN59_HUMAN Coiled-coil domain-containing protein 151 OS=Homo sapiens GN=CCDC151 PE=4 SV=1;>tr|B4DXT0|B4DXT0_HUMAN Coiled-coil domain-contain	4	1	1	1	0	0	1	1	0	0	0	0	1	1	0	0	0	0	1	1	0	0	2.5	2.5	2.5	47.391	404	404;535;541;595	1	2												1
A5YKK6;A5YKK6-2;A5YKK6-3;B5MDN3;A5YKK6-4;H3BMZ2;H3BNB1;H3BTH2;H3BR89;H3BVC9;H3BT18;H3BU44;H3BMH0	A5YKK6;A5YKK6-2;A5YKK6-3;B5MDN3;A5YKK6-4	49;48;43;29;28;11;6;4;2;2;1;1;1	49;48;43;29;28;11;6;4;2;2;1;1;1	49;48;43;29;28;11;6;4;2;2;1;1;1	CCR4-NOT transcription complex subunit 1	CNOT1	>sp|A5YKK6|CNOT1_HUMAN CCR4-NOT transcription complex subunit 1 OS=Homo sapiens GN=CNOT1 PE=1 SV=2;>sp|A5YKK6-2|CNOT1_HUMAN Isoform 2 of CCR4-NOT transcription complex subunit 1 OS=Homo sapiens GN=CNOT1;>sp|A5YKK6-3|CNOT1_HUMAN Isoform 3 of CCR4-NOT transc	13	49	49	49	43	37	36	43	35	39	43	37	36	43	35	39	43	37	36	43	35	39	24.5	24.5	24.5	266.94	2376	2376;2371;2150;1227;1551;439;185;68;193;241;62;96;277	5.77	13	49	51	32	19	19	18	58	46	37	65	59	52
A6NCC9;E9PME3;C9JHT9;C9JJV1;Q9Y5U2-2;Q9Y5U2;E9PL88;C9JDU0	A6NCC9;E9PME3;C9JHT9;C9JJV1;Q9Y5U2-2;Q9Y5U2	5;5;5;5;5;5;2;2	5;5;5;5;5;5;2;2	5;5;5;5;5;5;2;2	Protein TSSC4	TSSC4	>tr|A6NCC9|A6NCC9_HUMAN Protein TSSC4 OS=Homo sapiens GN=TSSC4 PE=1 SV=1;>tr|E9PME3|E9PME3_HUMAN Protein TSSC4 (Fragment) OS=Homo sapiens GN=TSSC4 PE=1 SV=1;>tr|C9JHT9|C9JHT9_HUMAN Protein TSSC4 (Fragment) OS=Homo sapiens GN=TSSC4 PE=1 SV=1;>tr|C9JJV1|C9JJ	8	5	5	5	5	5	5	5	5	5	5	5	5	5	5	5	5	5	5	5	5	5	45.7	45.7	45.7	13.847	127	127;191;203;207;265;329;110;112	4.28		13	13	16	10	10	7	2			12	13	15
H3BTL1;Q9GZQ8;A6NCE7;Q9H492;Q9H492-2	H3BTL1;Q9GZQ8;A6NCE7;Q9H492;Q9H492-2	2;2;2;1;1	2;2;2;1;1	2;2;2;1;1	Microtubule-associated proteins 1A/1B light chain 3B;Microtubule-associated proteins 1A/1B light chain 3 beta 2;Microtubule-associated proteins 1A/1B light chain 3A	MAP1LC3B;MAP1LC3B2;MAP1LC3A	>tr|H3BTL1|H3BTL1_HUMAN Microtubule-associated protein 1 light chain 3 beta, isoform CRA_f OS=Homo sapiens GN=MAP1LC3B PE=3 SV=1;>sp|Q9GZQ8|MLP3B_HUMAN Microtubule-associated proteins 1A/1B light chain 3B OS=Homo sapiens GN=MAP1LC3B PE=1 SV=3;>sp|A6NCE7|MP	5	2	2	2	2	2	2	2	2	2	2	2	2	2	2	2	2	2	2	2	2	2	28	28	28	9.0115	75	75;125;125;121;125	6.42					6	6	1	5	1		3	3	4
S4R360;J3KPP0;Q9Y6G3;A6NCI0;S4R2Z7	S4R360;J3KPP0;Q9Y6G3;A6NCI0;S4R2Z7	3;3;3;3;3	3;3;3;3;3	3;3;3;3;3	39S ribosomal protein L42, mitochondrial	MRPL42	>tr|S4R360|S4R360_HUMAN 39S ribosomal protein L42, mitochondrial OS=Homo sapiens GN=MRPL42 PE=1 SV=1;>tr|J3KPP0|J3KPP0_HUMAN 39S ribosomal protein L42, mitochondrial OS=Homo sapiens GN=MRPL42 PE=1 SV=1;>sp|Q9Y6G3|RM42_HUMAN 39S ribosomal protein L42, mitoc	5	3	3	3	2	2	2	2	2	2	2	2	2	2	2	2	2	2	2	2	2	2	28.1	28.1	28.1	14.882	128	128;139;142;142;155	3.93	4		1	6			4				2	2	4
A6NCS6	A6NCS6	6	6	6	Uncharacterized protein C2orf72	C2orf72	>sp|A6NCS6|CB072_HUMAN Uncharacterized protein C2orf72 OS=Homo sapiens GN=C2orf72 PE=2 SV=2	1	6	6	6	4	4	3	5	5	6	4	4	3	5	5	6	4	4	3	5	5	6	26.1	26.1	26.1	30.48	295	295	7.13		5	2	1		4	16	2	7	10	8	8	6
A6ND22;B4E032;Q9Y3D3	A6ND22;B4E032;Q9Y3D3	5;5;5	5;5;5	5;5;5	28S ribosomal protein S16, mitochondrial	MRPS16	>tr|A6ND22|A6ND22_HUMAN 28S ribosomal protein S16, mitochondrial OS=Homo sapiens GN=MRPS16 PE=1 SV=1;>tr|B4E032|B4E032_HUMAN 28S ribosomal protein S16, mitochondrial OS=Homo sapiens GN=MRPS16 PE=1 SV=1;>sp|Q9Y3D3|RT16_HUMAN 28S ribosomal protein S16, mitoc	3	5	5	5	4	4	4	4	5	4	4	4	4	4	5	4	4	4	4	4	5	4	50.5	50.5	50.5	11.15	99	99;123;137	6.97			2	6	1	2	11	9	1	6	7	5	6
A6ND36;A6ND36-2	A6ND36;A6ND36-2	2;1	2;1	2;1	Protein FAM83G	FAM83G	>sp|A6ND36|FA83G_HUMAN Protein FAM83G OS=Homo sapiens GN=FAM83G PE=1 SV=2;>sp|A6ND36-2|FA83G_HUMAN Isoform 2 of Protein FAM83G OS=Homo sapiens GN=FAM83G	2	2	2	2	2	2	2	2	1	2	2	2	2	2	1	2	2	2	2	2	1	2	3	3	3	90.834	823	823;477	8.54								6	7		3	2	2
A6NDB9;K7EKN5	A6NDB9;K7EKN5	2;1	2;1	2;1	Paralemmin-3	PALM3	>sp|A6NDB9|PALM3_HUMAN Paralemmin-3 OS=Homo sapiens GN=PALM3 PE=1 SV=2;>tr|K7EKN5|K7EKN5_HUMAN Paralemmin-3 (Fragment) OS=Homo sapiens GN=PALM3 PE=1 SV=1	2	2	2	2	2	2	2	2	2	2	2	2	2	2	2	2	2	2	2	2	2	2	3.4	3.4	3.4	71.695	673	673;193	3.89	2	6			6	5					3	3	3
A6NDG6;H3BV17	A6NDG6	14;2	14;2	14;2	Phosphoglycolate phosphatase	PGP	>sp|A6NDG6|PGP_HUMAN Phosphoglycolate phosphatase OS=Homo sapiens GN=PGP PE=1 SV=1	2	14	14	14	13	13	11	12	13	12	13	13	11	12	13	12	13	13	11	12	13	12	58.6	58.6	58.6	34.006	321	321;57	6.68		29	17	4	4	15	36	50	38	18	33	36	29
A6NDU8	A6NDU8	4	4	4	UPF0600 protein C5orf51	C5orf51	>sp|A6NDU8|CE051_HUMAN UPF0600 protein C5orf51 OS=Homo sapiens GN=C5orf51 PE=1 SV=1	1	4	4	4	4	4	2	2	2	2	4	4	2	2	2	2	4	4	2	2	2	2	20.7	20.7	20.7	33.62	294	294	5.75				6	5	8	3			2	6	6	4
P51610-4;A6NEM2;P51610-2;P51610;P51610-3;H7C1C4	P51610-4;A6NEM2;P51610-2;P51610	32;32;30;30;11;5	32;32;30;30;11;5	31;31;29;29;11;4	Host cell factor 1;HCF N-terminal chain 1;HCF N-terminal chain 2;HCF N-terminal chain 3;HCF N-terminal chain 4;HCF N-terminal chain 5;HCF N-terminal chain 6;HCF C-terminal chain 1;HCF C-terminal chain 2;HCF C-terminal chain 3;HCF C-terminal chain 4;HCF C-terminal chain 5;HCF C-terminal chain 6	HCFC1	>sp|P51610-4|HCFC1_HUMAN Isoform 4 of Host cell factor 1 OS=Homo sapiens GN=HCFC1;>tr|A6NEM2|A6NEM2_HUMAN HCF N-terminal chain 5 OS=Homo sapiens GN=HCFC1 PE=1 SV=2;>sp|P51610-2|HCFC1_HUMAN Isoform 2 of Host cell factor 1 OS=Homo sapiens GN=HCFC1;>sp|P51610	6	32	32	31	28	29	28	29	29	30	28	29	28	29	29	30	27	28	27	28	28	29	18.1	18.1	17.7	213.4	2079	2079;2080;1966;2035;428;611	5.87		32	51	61	16	31	31	37	66	18	53	59	58
A6NFI3	A6NFI3	2	2	2	Zinc finger protein 316	ZNF316	>sp|A6NFI3|ZN316_HUMAN Zinc finger protein 316 OS=Homo sapiens GN=ZNF316 PE=1 SV=1	1	2	2	2	0	0	1	1	1	1	0	0	1	1	1	1	0	0	1	1	1	1	2.1	2.1	2.1	108.44	1004	1004	5.6					4			1					1
Q9H1A7;Q9GZM3;P52435;Q9H1A6;E2QRJ6;A6NFM0;F8WF84;D6RAG0;E7EP90;Q9GZM3-2;E7EWC6;H0Y980	Q9H1A7;Q9GZM3;P52435;Q9H1A6;E2QRJ6;A6NFM0;F8WF84	3;3;3;3;3;3;2;1;1;1;1;1	3;3;3;3;3;3;2;1;1;1;1;1	3;3;3;3;3;3;2;1;1;1;1;1	DNA-directed RNA polymerase II subunit RPB11-b2;DNA-directed RNA polymerase II subunit RPB11-b1;DNA-directed RNA polymerase II subunit RPB11-a	POLR2J3;POLR2J2;POLR2J;POLR2J1	>sp|Q9H1A7|RPB1C_HUMAN DNA-directed RNA polymerase II subunit RPB11-b2 OS=Homo sapiens GN=POLR2J3 PE=3 SV=1;>sp|Q9GZM3|RPB1B_HUMAN DNA-directed RNA polymerase II subunit RPB11-b1 OS=Homo sapiens GN=POLR2J2 PE=1 SV=2;>sp|P52435|RPB11_HUMAN DNA-directed RNA	12	3	3	3	2	2	3	3	3	3	2	2	3	3	3	3	2	2	3	3	3	3	24.3	24.3	24.3	13.092	115	115;115;117;127;158;158;128;73;76;116;274;304	2.85		14		1	5						2	3	4
Q8IZP0-10;Q8IZP0-8;F5H1G9;Q8IZP0-7;F8WA55;Q8IZP0-2;Q8IZP0-4;Q8IZP0-3;Q8IZP0-5;Q8IZP0-6;Q8IZP0-9;F8WA56;Q8IZP0;A6NFN2;Q8IZP0-12;Q8IZP0-11;H0Y6B5;F8WAL6	Q8IZP0-10;Q8IZP0-8;F5H1G9;Q8IZP0-7;F8WA55;Q8IZP0-2;Q8IZP0-4;Q8IZP0-3;Q8IZP0-5;Q8IZP0-6;Q8IZP0-9;F8WA56;Q8IZP0;A6NFN2;Q8IZP0-12;Q8IZP0-11	14;14;14;14;14;14;14;14;14;14;14;14;14;14;12;8;1;1	14;14;14;14;14;14;14;14;14;14;14;14;14;14;12;8;1;1	10;10;10;10;10;10;10;10;10;10;10;10;10;10;8;7;0;0	Abl interactor 1	ABI1	>sp|Q8IZP0-10|ABI1_HUMAN Isoform 10 of Abl interactor 1 OS=Homo sapiens GN=ABI1;>sp|Q8IZP0-8|ABI1_HUMAN Isoform 8 of Abl interactor 1 OS=Homo sapiens GN=ABI1;>tr|F5H1G9|F5H1G9_HUMAN Abl interactor 1 OS=Homo sapiens GN=ABI1 PE=1 SV=1;>sp|Q8IZP0-7|ABI1_HUMAN	18	14	14	10	13	12	13	13	11	14	13	12	13	13	11	14	9	8	9	10	7	10	39.2	39.2	30.2	42.667	388	388;393;394;422;423;446;451;452;476;480;481;482;508;509;496;329;293;299	3.97	11	19	30	20	37	13	2	7			26	24	25
Q92599-2;A6NMH6;A6NFQ9;Q92599-4;F8W8I8;Q92599;Q92599-3;C9JV02;C9J4G8	Q92599-2;A6NMH6;A6NFQ9;Q92599-4;F8W8I8;Q92599;Q92599-3	10;10;10;10;10;10;8;4;3	7;7;7;7;7;7;5;3;3	7;7;7;7;7;7;5;3;3	Septin-8	2019-09-08	>sp|Q92599-2|SEPT8_HUMAN Isoform 2 of Septin-8 OS=Homo sapiens GN=SEPT8;>tr|A6NMH6|A6NMH6_HUMAN Septin-8 OS=Homo sapiens GN=SEPT8 PE=1 SV=1;>tr|A6NFQ9|A6NFQ9_HUMAN Septin-8 OS=Homo sapiens GN=SEPT8 PE=1 SV=1;>sp|Q92599-4|SEPT8_HUMAN Isoform 4 of Septin-8 O	9	10	7	7	9	9	8	9	8	9	7	7	6	7	5	6	7	7	6	7	5	6	34.3	26.3	26.3	49.814	429	429;430;440;442;460;483;369;130;97	4.6		14	9	6	2	4	13	5			8	10	8
Q96EV8-2;Q96EV8;A6NFV8;D6RAX1;D6RCT8	Q96EV8-2;Q96EV8;A6NFV8;D6RAX1;D6RCT8	2;2;2;1;1	2;2;2;1;1	2;2;2;1;1	Dysbindin	DTNBP1	>sp|Q96EV8-2|DTBP1_HUMAN Isoform 2 of Dysbindin OS=Homo sapiens GN=DTNBP1;>sp|Q96EV8|DTBP1_HUMAN Dysbindin OS=Homo sapiens GN=DTNBP1 PE=1 SV=1;>tr|A6NFV8|A6NFV8_HUMAN Dysbindin OS=Homo sapiens GN=DTNBP1 PE=1 SV=2;>tr|D6RAX1|D6RAX1_HUMAN Dysbindin OS=Homo s	5	2	2	2	1	2	2	1	2	2	1	2	2	1	2	2	1	2	2	1	2	2	7.6	7.6	7.6	34.83	303	303;351;352;44;208	7.1					1	3		6			1	2	2
Q9UKK9;A6NFX8;A6NJU6;A6NCQ0;H0YEY4;C9JYY9	Q9UKK9;A6NFX8;A6NJU6	10;10;6;4;3;1	10;10;6;4;3;1	10;10;6;4;3;1	ADP-sugar pyrophosphatase	NUDT5	>sp|Q9UKK9|NUDT5_HUMAN ADP-sugar pyrophosphatase OS=Homo sapiens GN=NUDT5 PE=1 SV=1;>tr|A6NFX8|A6NFX8_HUMAN ADP-sugar pyrophosphatase OS=Homo sapiens GN=NUDT5 PE=1 SV=1;>tr|A6NJU6|A6NJU6_HUMAN ADP-sugar pyrophosphatase OS=Homo sapiens GN=NUDT5 PE=1 SV=2	6	10	10	10	10	10	10	10	10	10	10	10	10	10	10	10	10	10	10	10	10	10	42.5	42.5	42.5	24.327	219	219;232;186;180;137;97	5.82		14	11	26	28	13	15	7	27	8	24	27	29
K7EIN1;K7ESN4;K7EIJ0;K7EIK1;K7ENL2;A6NG10;K7EMC9;Q969T9	K7EIN1;K7ESN4;K7EIJ0;K7EIK1;K7ENL2;A6NG10;K7EMC9;Q969T9	1;1;1;1;1;1;1;1	1;1;1;1;1;1;1;1	1;1;1;1;1;1;1;1	WW domain-binding protein 2	WBP2	>tr|K7EIN1|K7EIN1_HUMAN WW domain-binding protein 2 (Fragment) OS=Homo sapiens GN=WBP2 PE=1 SV=1;>tr|K7ESN4|K7ESN4_HUMAN WW domain-binding protein 2 (Fragment) OS=Homo sapiens GN=WBP2 PE=1 SV=1;>tr|K7EIJ0|K7EIJ0_HUMAN WW domain-binding protein 2 (Fragment)	8	1	1	1	1	1	1	1	1	1	1	1	1	1	1	1	1	1	1	1	1	1	8.8	8.8	8.8	11.967	114	114;152;167;205;231;239;257;261	6.53						8	6	1			3	3	2
A6NG79;Q92733;H0YE12;H0Y679	A6NG79;Q92733;H0YE12;H0Y679	5;5;3;3	5;5;3;3	5;5;3;3	Proline-rich protein PRCC	PRCC	>tr|A6NG79|A6NG79_HUMAN Proline-rich protein PRCC OS=Homo sapiens GN=PRCC PE=1 SV=1;>sp|Q92733|PRCC_HUMAN Proline-rich protein PRCC OS=Homo sapiens GN=PRCC PE=1 SV=1;>tr|H0YE12|H0YE12_HUMAN Proline-rich protein PRCC (Fragment) OS=Homo sapiens GN=PRCC PE=1	4	5	5	5	4	4	5	5	5	4	4	4	5	5	5	4	4	4	5	5	5	4	13.9	13.9	13.9	48.959	459	459;491;198;257	5.26		12	5				11	6	4		6	6	7
P51808;A6NGJ0;F2Z328	P51808;A6NGJ0;F2Z328	3;3;2	3;3;2	3;3;2	Dynein light chain Tctex-type 3	DYNLT3	>sp|P51808|DYLT3_HUMAN Dynein light chain Tctex-type 3 OS=Homo sapiens GN=DYNLT3 PE=1 SV=1;>tr|A6NGJ0|A6NGJ0_HUMAN Dynein light chain Tctex-type 3 OS=Homo sapiens GN=DYNLT3 PE=4 SV=1;>tr|F2Z328|F2Z328_HUMAN Dynein light chain Tctex-type 3 OS=Homo sapiens G	3	3	3	3	2	3	2	2	3	2	2	3	2	2	3	2	2	3	2	2	3	2	44	44	44	13.062	116	116;152;122	3.62	11	6			3	6	6				5	6	5
P36268-2;B5MCK8;A6NGU5;P36268;P19440;P36268-3;E7ET76;E7ETR7;Q14390;B5MC36;P19440-3;B5MD39;J3KR28;B5MC34;P19440-2	P36268-2;B5MCK8;A6NGU5;P36268;P19440;P36268-3;E7ET76	3;3;3;3;3;3;2;1;1;1;1;1;1;1;1	3;3;3;3;3;3;2;1;1;1;1;1;1;1;1	3;3;3;3;3;3;2;1;1;1;1;1;1;1;1	Putative gamma-glutamyltranspeptidase 3;Putative gamma-glutamyltranspeptidase 3 heavy chain;Putative gamma-glutamyltranspeptidase 3 light chain;Gamma-glutamyltranspeptidase 2;Gamma-glutamyltranspeptidase 2 heavy chain;Gamma-glutamyltranspeptidase 2 light chain;Gamma-glutamyltranspeptidase 1;Gamma-glutamyltranspeptidase 1 heavy chain;Gamma-glutamyltranspeptidase 1 light chain	GGT2;GGT3P;GGT1	>sp|P36268-2|GGT2_HUMAN Isoform 2 of Inactive gamma-glutamyltranspeptidase 2 OS=Homo sapiens GN=GGT2;>tr|B5MCK8|B5MCK8_HUMAN Inactive gamma-glutamyltranspeptidase 2 OS=Homo sapiens GN=GGT2 PE=4 SV=2;>sp|A6NGU5|GGT3_HUMAN Putative gamma-glutamyltranspeptida	15	3	3	3	2	1	1	2	1	1	2	1	1	2	1	1	2	1	1	2	1	1	5.7	5.7	5.7	60.778	559	559;559;568;569;569;574;463;174;218;218;225;225;236;252;366	4.78			3	1	4					1	2	1	1
A6NGW1;O95070;E9PIZ0;C9JST7;E9PS11	A6NGW1;O95070;E9PIZ0;C9JST7	4;4;3;3;1	4;4;3;3;1	4;4;3;3;1	Protein YIF1A	YIF1A	>tr|A6NGW1|A6NGW1_HUMAN Protein YIF1A OS=Homo sapiens GN=YIF1A PE=1 SV=1;>sp|O95070|YIF1A_HUMAN Protein YIF1A OS=Homo sapiens GN=YIF1A PE=1 SV=2;>tr|E9PIZ0|E9PIZ0_HUMAN Protein YIF1A (Fragment) OS=Homo sapiens GN=YIF1A PE=1 SV=1;>tr|C9JST7|C9JST7_HUMAN Pro	5	4	4	4	4	4	3	4	3	3	4	4	3	4	3	3	4	4	3	4	3	3	24.1	24.1	24.1	26.377	241	241;293;160;199;79	4.56	2	9	7	3			1	6	2	2	6	6	5
H7BZG6;H0Y673;P56377;A6NH01;B7Z3M9;P56377-2	H7BZG6;H0Y673;P56377;A6NH01;B7Z3M9;P56377-2	3;3;3;3;3;3	1;1;1;1;1;1	1;1;1;1;1;1	AP-1 complex subunit sigma-2	AP1S2	>tr|H7BZG6|H7BZG6_HUMAN AP-1 complex subunit sigma-2 (Fragment) OS=Homo sapiens GN=AP1S2 PE=1 SV=1;>tr|H0Y673|H0Y673_HUMAN AP-1 complex subunit sigma-2 (Fragment) OS=Homo sapiens GN=AP1S2 PE=1 SV=1;>sp|P56377|AP1S2_HUMAN AP-1 complex subunit sigma-2 OS=Hom	6	3	1	1	3	2	3	3	3	3	1	1	1	1	1	1	1	1	1	1	1	1	16.4	6.2	6.2	17.393	146	146;153;157;160;195;202	4.75				2	6						1	1	2
A6NHN7;Q14202-2;Q14202;A6NHB5;Q14202-3;A6NL54	A6NHN7;Q14202-2;Q14202;A6NHB5;Q14202-3;A6NL54	2;2;2;2;1;1	2;2;2;2;1;1	2;2;2;2;1;1	Zinc finger MYM-type protein 3	ZMYM3	>tr|A6NHN7|A6NHN7_HUMAN Zinc finger MYM-type protein 3 OS=Homo sapiens GN=ZMYM3 PE=1 SV=1;>sp|Q14202-2|ZMYM3_HUMAN Isoform 2 of Zinc finger MYM-type protein 3 OS=Homo sapiens GN=ZMYM3;>sp|Q14202|ZMYM3_HUMAN Zinc finger MYM-type protein 3 OS=Homo sapiens GN	6	2	2	2	1	2	1	0	2	2	1	2	1	0	2	2	1	2	1	0	2	2	1.5	1.5	1.5	141.79	1280	1280;1358;1370;1372;495;497	6.88				1	3				4		1	2	1
A6NHL2-2;A6NHL2	A6NHL2-2;A6NHL2	3;3	1;1	1;1	Tubulin alpha chain-like 3	TUBAL3	>sp|A6NHL2-2|TBAL3_HUMAN Isoform 2 of Tubulin alpha chain-like 3 OS=Homo sapiens GN=TUBAL3;>sp|A6NHL2|TBAL3_HUMAN Tubulin alpha chain-like 3 OS=Homo sapiens GN=TUBAL3 PE=1 SV=2	2	3	1	1	3	3	3	3	3	3	1	1	1	1	1	1	1	1	1	1	1	1	8.1	4.2	4.2	45.517	406	406;446	8.29							4	12	12		4	4	5
A6NHQ2;R4GMW7	A6NHQ2;R4GMW7	2;2	1;1	1;1	rRNA/tRNA 2-O-methyltransferase fibrillarin-like protein 1	FBLL1	>sp|A6NHQ2|FBLL1_HUMAN rRNA/tRNA 2-O-methyltransferase fibrillarin-like protein 1 OS=Homo sapiens GN=FBLL1 PE=3 SV=1;>tr|R4GMW7|R4GMW7_HUMAN rRNA/tRNA 2-O-methyltransferase fibrillarin-like protein 1 OS=Homo sapiens GN=FBLL1 PE=1 SV=1	2	2	1	1	2	2	2	2	2	2	1	1	1	1	1	1	1	1	1	1	1	1	6.6	3.3	3.3	34.675	333	333;334	3.27		1	6	4							2	2	2
A6NHR9-2;A6NHR9;J3KTL8;A6NHR9-3;J3KRK8;J3QSH1	A6NHR9-2;A6NHR9;J3KTL8	28;28;20;11;3;2	28;28;20;11;3;2	28;28;20;11;3;2	Structural maintenance of chromosomes flexible hinge domain-containing protein 1	SMCHD1	>sp|A6NHR9-2|SMHD1_HUMAN Isoform 2 of Structural maintenance of chromosomes flexible hinge domain-containing protein 1 OS=Homo sapiens GN=SMCHD1;>sp|A6NHR9|SMHD1_HUMAN Structural maintenance of chromosomes flexible hinge domain-containing protein 1 OS=Homo	6	28	28	28	22	23	21	21	22	23	22	23	21	21	22	23	22	23	21	21	22	23	15.1	15.1	15.1	215.74	1917	1917;2005;1388;762;49;150	6.58		4	16	26	17	13	35	45	29	8	36	35	30
A6NNH0;A6NHX0	A6NNH0;A6NHX0	1;1	1;1	1;1	GATS-like protein 1;GATS-like protein 2	GATSL1;GATSL2	>sp|A6NNH0|GATL1_HUMAN GATS-like protein 1 OS=Homo sapiens GN=GATSL1 PE=3 SV=2;>sp|A6NHX0|GATL2_HUMAN GATS-like protein 2 OS=Homo sapiens GN=GATSL2 PE=2 SV=3	2	1	1	1	1	1	1	1	1	1	1	1	1	1	1	1	1	1	1	1	1	1	3.6	3.6	3.6	36.042	329	329;329	9									6		1	1	1
E9PJK4;A6NI28	E9PJK4;A6NI28	2;2	2;2	2;2	Rho GTPase-activating protein 42	ARHGAP42	>tr|E9PJK4|E9PJK4_HUMAN Rho GTPase-activating protein 42 OS=Homo sapiens GN=ARHGAP42 PE=1 SV=1;>sp|A6NI28|RHG42_HUMAN Rho GTPase-activating protein 42 OS=Homo sapiens GN=ARHGAP42 PE=1 SV=3	2	2	2	2	2	2	1	1	2	2	2	2	1	1	2	2	2	2	1	1	2	2	2.4	2.4	2.4	94.506	840	840;874	3.4	6						4				2	2	1
A6NIH7	A6NIH7	4	4	4	Protein unc-119 homolog B	UNC119B	>sp|A6NIH7|U119B_HUMAN Protein unc-119 homolog B OS=Homo sapiens GN=UNC119B PE=1 SV=1	1	4	4	4	2	4	3	3	3	4	2	4	3	3	3	4	2	4	3	3	3	4	25.9	25.9	25.9	28.136	251	251	3.35		5	3	12							2	4	3
Q16540;A6NJD9;A8MVT4;A8MYK1;H7C2P7	Q16540;A6NJD9;A8MVT4;A8MYK1;H7C2P7	5;5;5;5;4	5;5;5;5;4	5;5;5;5;4	39S ribosomal protein L23, mitochondrial	MRPL23	>sp|Q16540|RM23_HUMAN 39S ribosomal protein L23, mitochondrial OS=Homo sapiens GN=MRPL23 PE=1 SV=1;>tr|A6NJD9|A6NJD9_HUMAN 39S ribosomal protein L23, mitochondrial OS=Homo sapiens GN=MRPL23 PE=1 SV=1;>tr|A8MVT4|A8MVT4_HUMAN 39S ribosomal protein L23, mitoc	5	5	5	5	5	3	3	5	5	5	5	3	3	5	5	5	5	3	3	5	5	5	30.1	30.1	30.1	17.781	153	153;163;166;191;118	6.18		4	4	5	4	6	4	13		5	7	6	6
Q8WTT2;A6NJZ9;F5H677	Q8WTT2;A6NJZ9;F5H677	7;7;6	7;7;6	7;7;6	Nucleolar complex protein 3 homolog	NOC3L	>sp|Q8WTT2|NOC3L_HUMAN Nucleolar complex protein 3 homolog OS=Homo sapiens GN=NOC3L PE=1 SV=1;>tr|A6NJZ9|A6NJZ9_HUMAN Nucleolar complex protein 3 homolog OS=Homo sapiens GN=NOC3L PE=1 SV=1;>tr|F5H677|F5H677_HUMAN Nucleolar complex protein 3 homolog OS=Homo	3	7	7	7	6	6	5	6	5	6	6	6	5	6	5	6	6	6	5	6	5	6	10.4	10.4	10.4	92.547	800	800;800;501	6.94	5			2	5	7	9	2	12	8	8	9	9
G3V4C8;H0YJY5;H0YJE0;A6NKD9	G3V4C8;H0YJY5;H0YJE0;A6NKD9	1;1;1;1	1;1;1;1	1;1;1;1	Coiled-coil domain-containing protein 85C	CCDC85C	>tr|G3V4C8|G3V4C8_HUMAN Coiled-coil domain-containing protein 85C (Fragment) OS=Homo sapiens GN=CCDC85C PE=4 SV=1;>tr|H0YJY5|H0YJY5_HUMAN Coiled-coil domain-containing protein 85C (Fragment) OS=Homo sapiens GN=CCDC85C PE=4 SV=1;>tr|H0YJE0|H0YJE0_HUMAN Coil	4	1	1	1	0	0	0	1	0	1	0	0	0	1	0	1	0	0	0	1	0	1	10.3	10.3	10.3	12.511	116	116;123;190;419	4.33				2	1
Q8IY57-3;A6NL56;Q8IY57	Q8IY57-3;A6NL56;Q8IY57	1;1;1	1;1;1	1;1;1	YY1-associated factor 2	YAF2	>sp|Q8IY57-3|YAF2_HUMAN Isoform 3 of YY1-associated factor 2 OS=Homo sapiens GN=YAF2;>tr|A6NL56|A6NL56_HUMAN YY1-associated factor 2 OS=Homo sapiens GN=YAF2 PE=1 SV=2;>sp|Q8IY57|YAF2_HUMAN YY1-associated factor 2 OS=Homo sapiens GN=YAF2 PE=1 SV=3	3	1	1	1	1	1	0	1	1	1	1	1	0	1	1	1	1	1	0	1	1	1	15.2	15.2	15.2	15.115	138	138;171;180	9.83									1	5	1	1
A6NLH6;Q9P003	A6NLH6;Q9P003	1;1	1;1	1;1	Protein cornichon homolog 4	CNIH4	>tr|A6NLH6|A6NLH6_HUMAN Protein cornichon homolog 4 OS=Homo sapiens GN=CNIH4 PE=1 SV=1;>sp|Q9P003|CNIH4_HUMAN Protein cornichon homolog 4 OS=Homo sapiens GN=CNIH4 PE=1 SV=1	2	1	1	1	1	1	1	1	1	1	1	1	1	1	1	1	1	1	1	1	1	1	14.6	14.6	14.6	15.771	137	137;139	7.7						1	7	22			5	4	6
Q9C035-2;Q9C035;A6NLP3;H7C134;E7EQQ5;Q9C035-6;Q9C035-5;Q9C035-4;F8W6N8;Q9C035-3	Q9C035-2;Q9C035;A6NLP3;H7C134;E7EQQ5;Q9C035-6;Q9C035-5;Q9C035-4;F8W6N8;Q9C035-3	2;2;2;1;1;1;1;1;1;1	2;2;2;1;1;1;1;1;1;1	2;2;2;1;1;1;1;1;1;1	Tripartite motif-containing protein 5	TRIM5	>sp|Q9C035-2|TRIM5_HUMAN Isoform Beta of Tripartite motif-containing protein 5 OS=Homo sapiens GN=TRIM5;>sp|Q9C035|TRIM5_HUMAN Tripartite motif-containing protein 5 OS=Homo sapiens GN=TRIM5 PE=1 SV=1;>tr|A6NLP3|A6NLP3_HUMAN Tripartite motif-containing prot	10	2	2	2	1	2	1	1	1	1	1	2	1	1	1	1	1	2	1	1	1	1	4.8	4.8	4.8	46.037	400	400;493;493;187;209;257;271;326;327;347	3.5		1	6	4		1					2	4	1
A6NMA8;O95825;H7C3S0;C9JQD0;C9K0F7;C9JAL0;F8WF64;C9JZK8;B3KQ77;H7C3I5;A6NND8;A6NHJ8	A6NMA8;O95825;H7C3S0;C9JQD0;C9K0F7;C9JAL0;F8WF64;C9JZK8;B3KQ77;H7C3I5;A6NND8;A6NHJ8	2;2;1;1;1;1;1;1;1;1;1;1	2;2;1;1;1;1;1;1;1;1;1;1	2;2;1;1;1;1;1;1;1;1;1;1	Quinone oxidoreductase-like protein 1	CRYZL1	>tr|A6NMA8|A6NMA8_HUMAN Quinone oxidoreductase-like protein 1 OS=Homo sapiens GN=CRYZL1 PE=1 SV=1;>sp|O95825|QORL1_HUMAN Quinone oxidoreductase-like protein 1 OS=Homo sapiens GN=CRYZL1 PE=1 SV=2;>tr|H7C3S0|H7C3S0_HUMAN Quinone oxidoreductase-like protein 1	12	2	2	2	2	2	2	2	2	1	2	2	2	2	2	1	2	2	2	2	2	1	9.3	9.3	9.3	37.061	334	334;349;96;107;158;181;183;197;198;241;322;325	5.92				3	1	3	6				2	3	3
E9PJK1;E9PRJ8;H0YDL9;H0YDJ9;P60033;E9PIF1;A6NMH8;E9PM31;H0YEE2	E9PJK1;E9PRJ8;H0YDL9;H0YDJ9;P60033;E9PIF1;A6NMH8	3;3;3;3;3;3;3;1;1	3;3;3;3;3;3;3;1;1	3;3;3;3;3;3;3;1;1	CD81 antigen	CD81	>tr|E9PJK1|E9PJK1_HUMAN CD81 antigen OS=Homo sapiens GN=CD81 PE=1 SV=1;>tr|E9PRJ8|E9PRJ8_HUMAN CD81 antigen (Fragment) OS=Homo sapiens GN=CD81 PE=1 SV=1;>tr|H0YDL9|H0YDL9_HUMAN CD81 antigen (Fragment) OS=Homo sapiens GN=CD81 PE=1 SV=1;>tr|H0YDJ9|H0YDJ9_HUM	9	3	3	3	3	3	3	3	3	3	3	3	3	3	3	3	3	3	3	3	3	3	35.8	35.8	35.8	17.963	165	165;209;221;225;236;242;274;92;148	6.21	3	4						6	1	5	4	3	3
O60879-2;A6NML8;O60879-3;C9J6U3;O60879;K4DI95	O60879-2;A6NML8;O60879-3;C9J6U3;O60879;K4DI95	9;9;9;9;9;9	9;9;9;9;9;9	9;9;9;9;9;9	Protein diaphanous homolog 2	DIAPH2	>sp|O60879-2|DIAP2_HUMAN Isoform 2 of Protein diaphanous homolog 2 OS=Homo sapiens GN=DIAPH2;>tr|A6NML8|A6NML8_HUMAN Diaphanous homolog 2 (Drosophila), isoform CRA_c OS=Homo sapiens GN=DIAPH2 PE=1 SV=3;>sp|O60879-3|DIAP2_HUMAN Isoform 3 of Protein diaphano	6	9	9	9	7	9	8	7	9	9	7	9	8	7	9	9	7	9	8	7	9	9	8.7	8.7	8.7	124.83	1096	1096;1096;1097;1097;1101;1101	5.54	4	6	11	14	5		8	6	6	10	10	11	12
P09884;A6NMQ1	P09884;A6NMQ1	4;4	4;4	4;4	DNA polymerase alpha catalytic subunit;DNA polymerase	POLA1	>sp|P09884|DPOLA_HUMAN DNA polymerase alpha catalytic subunit OS=Homo sapiens GN=POLA1 PE=1 SV=2;>tr|A6NMQ1|A6NMQ1_HUMAN DNA polymerase OS=Homo sapiens GN=POLA1 PE=1 SV=1	2	4	4	4	3	2	1	3	4	3	3	2	1	3	4	3	3	2	1	3	4	3	3.2	3.2	3.2	165.91	1462	1462;1468	6.45		1	2	5	1		1	5	1	4	3	2	2
O43768-6;O43768-5;O43768-2;O43768;O43768-9;O43768-7;O43768-3;O43768-4;A6NMQ3;C9JUF4;Q5T5H1;O43768-8	O43768-6;O43768-5;O43768-2;O43768;O43768-9;O43768-7;O43768-3;O43768-4;A6NMQ3;C9JUF4;Q5T5H1	5;5;5;5;5;5;5;5;5;5;5;2	5;5;5;5;5;5;5;5;5;5;5;2	4;4;4;4;4;4;4;4;4;4;4;2	Alpha-endosulfine	ENSA	>sp|O43768-6|ENSA_HUMAN Isoform 6 of Alpha-endosulfine OS=Homo sapiens GN=ENSA;>sp|O43768-5|ENSA_HUMAN Isoform 5 of Alpha-endosulfine OS=Homo sapiens GN=ENSA;>sp|O43768-2|ENSA_HUMAN Isoform 2 of Alpha-endosulfine OS=Homo sapiens GN=ENSA;>sp|O43768|ENSA_HUM	12	5	5	4	4	4	5	4	5	4	4	4	5	4	5	4	3	3	4	3	4	3	46.9	46.9	37.2	12.404	113	113;117;117;121;133;133;137;140;140;144;187;105	2.9	6	18	15	22	1						10	11	11
A6NN80;P08133;P08133-2;E5RK69;E7EMC6;E5RK63;E5RJF5;E5RFF0;E5RI05;E5RIU8;E5RJR0;H0YC77	A6NN80;P08133;P08133-2;E5RK69;E7EMC6	24;24;23;14;12;7;6;6;5;4;4;2	24;24;23;14;12;7;6;6;5;4;4;2	24;24;23;14;12;7;6;6;5;4;4;2	Annexin;Annexin A6	ANXA6	>tr|A6NN80|A6NN80_HUMAN Annexin OS=Homo sapiens GN=ANXA6 PE=1 SV=3;>sp|P08133|ANXA6_HUMAN Annexin A6 OS=Homo sapiens GN=ANXA6 PE=1 SV=3;>sp|P08133-2|ANXA6_HUMAN Isoform 2 of Annexin A6 OS=Homo sapiens GN=ANXA6;>tr|E5RK69|E5RK69_HUMAN Annexin OS=Homo sapien	12	24	24	24	24	24	23	23	24	24	24	24	23	23	24	24	24	24	23	23	24	24	41.1	41.1	41.1	75.276	667	667;673;641;460;330;150;129;156;129;95;110;91	5.06	9	75	30	39	14	16	19	19	18	39	47	45	46
A6NNI4;P21926;G8JLH6;F5GXT1	A6NNI4;P21926;G8JLH6	4;4;4;1	4;4;4;1	4;4;4;1	CD9 antigen	CD9	>tr|A6NNI4|A6NNI4_HUMAN CD9 antigen OS=Homo sapiens GN=CD9 PE=1 SV=1;>sp|P21926|CD9_HUMAN CD9 antigen OS=Homo sapiens GN=CD9 PE=1 SV=4;>tr|G8JLH6|G8JLH6_HUMAN CD9 antigen (Fragment) OS=Homo sapiens GN=CD9 PE=1 SV=1	4	4	4	4	4	4	3	3	4	4	4	4	3	3	4	4	4	4	3	3	4	4	29.6	29.6	29.6	17.764	159	159;228;228;141	4.16	8	2	6	16	10	1			6		9	9	5
A6NNK5;Q12888;Q12888-3;Q12888-2;C9JXV0;M0R142;H7BZY0;H7C3N7	A6NNK5;Q12888;Q12888-3;Q12888-2	12;12;12;12;4;1;1;1	12;12;12;12;4;1;1;1	12;12;12;12;4;1;1;1	Tumor suppressor p53-binding protein 1	TP53BP1	>tr|A6NNK5|A6NNK5_HUMAN Tumor suppressor p53-binding protein 1 OS=Homo sapiens GN=TP53BP1 PE=1 SV=2;>sp|Q12888|TP53B_HUMAN Tumor suppressor p53-binding protein 1 OS=Homo sapiens GN=TP53BP1 PE=1 SV=2;>sp|Q12888-3|TP53B_HUMAN Isoform 3 of Tumor suppressor p5	8	12	12	12	10	10	10	11	10	9	10	10	10	11	10	9	10	10	10	11	10	9	8.1	8.1	8.1	209.02	1927	1927;1972;1975;1977;1033;144;163;192	3.22	8	27	15	12	4	5		5			14	12	11
Q5VT03;Q8IVF1;B1AL46;A6NNL0	Q5VT03;Q8IVF1;B1AL46;A6NNL0	1;1;1;1	1;1;1;1	1;1;1;1	Protein FAM22D;Protein FAM22A;Protein FAM22E;Protein FAM22B	FAM22D;FAM22A;FAM22E;FAM22B	>sp|Q5VT03|NTM2D_HUMAN NUT family member 2D OS=Homo sapiens GN=NUTM2D PE=3 SV=2;>sp|Q8IVF1|NTM2A_HUMAN NUT family member 2A OS=Homo sapiens GN=NUTM2A PE=2 SV=4;>sp|B1AL46|NTM2E_HUMAN NUT family member 2E OS=Homo sapiens GN=NUTM2E PE=2 SV=3;>sp|A6NNL0|NTM2B	4	1	1	1	1	1	1	1	1	1	1	1	1	1	1	1	1	1	1	1	1	1	0.9	0.9	0.9	86.275	806	806;878;878;878	5.38				2	5	5	1				2	2	2
A6PVM9;Q9BQI0-3;Q9BQI0;F5GYC9;Q9BQI0-2	A6PVM9;Q9BQI0-3;Q9BQI0;F5GYC9;Q9BQI0-2	1;1;1;1;1	1;1;1;1;1	1;1;1;1;1	Allograft inflammatory factor 1-like	AIF1L	>tr|A6PVM9|A6PVM9_HUMAN Allograft inflammatory factor 1-like OS=Homo sapiens GN=AIF1L PE=1 SV=1;>sp|Q9BQI0-3|AIF1L_HUMAN Isoform 3 of Allograft inflammatory factor 1-like OS=Homo sapiens GN=AIF1L;>sp|Q9BQI0|AIF1L_HUMAN Allograft inflammatory factor 1-like	5	1	1	1	1	1	1	1	1	1	1	1	1	1	1	1	1	1	1	1	1	1	8.5	8.5	8.5	10.501	94	94;142;150;155;176	7.64						1	2	8			2	1	3
Q15257-2;A6PVN5;Q15257;Q15257-3;B4DZF8;A6PVN9;Q15257-4;Q5T949;Q5T948;Q68CR8;A6PVN6;B7ZBQ0;A6PVN8;A6PVN7;C9IZ76;B7ZBP9;B7ZBP7;B4DDQ6;H0Y6E5	Q15257-2;A6PVN5;Q15257;Q15257-3;B4DZF8;A6PVN9;Q15257-4;Q5T949;Q5T948;Q68CR8;A6PVN6	10;10;10;9;8;7;7;6;6;5;5;4;4;3;3;2;2;2;2	10;10;10;9;8;7;7;6;6;5;5;4;4;3;3;2;2;2;2	10;10;10;9;8;7;7;6;6;5;5;4;4;3;3;2;2;2;2	Serine/threonine-protein phosphatase 2A activator	PPP2R4;DKFZp781M17165	>sp|Q15257-2|PTPA_HUMAN Isoform 1 of Serine/threonine-protein phosphatase 2A activator OS=Homo sapiens GN=PPP2R4;>tr|A6PVN5|A6PVN5_HUMAN Serine/threonine-protein phosphatase 2A activator OS=Homo sapiens GN=PPP2R4 PE=1 SV=1;>sp|Q15257|PTPA_HUMAN Serine/thre	19	10	10	10	10	10	8	9	8	9	10	10	8	9	8	9	10	10	8	9	8	9	40.2	40.2	40.2	36.775	323	323;329;358;294;374;263;281;250;253;104;176;61;129;64;132;41;77;151;218	5.42	3	22	4	14	9	1		4	22	7	18	16	14
Q9NNX1-3;A6PVU8;Q9NNX1-2;Q9NNX1;F5H607	Q9NNX1-3;A6PVU8;Q9NNX1-2;Q9NNX1;F5H607	1;1;1;1;1	1;1;1;1;1	1;1;1;1;1	Tuftelin	TUFT1	>sp|Q9NNX1-3|TUFT1_HUMAN Isoform 3 of Tuftelin OS=Homo sapiens GN=TUFT1;>tr|A6PVU8|A6PVU8_HUMAN Tuftelin OS=Homo sapiens GN=TUFT1 PE=4 SV=1;>sp|Q9NNX1-2|TUFT1_HUMAN Isoform 2 of Tuftelin OS=Homo sapiens GN=TUFT1;>sp|Q9NNX1|TUFT1_HUMAN Tuftelin OS=Homo sapi	5	1	1	1	1	1	0	1	0	0	1	1	0	1	0	0	1	1	0	1	0	0	4.2	4.2	4.2	37.928	331	331;335;365;390;409	5.5					2	2					2	1
Q99755-3;A6PW57;Q99755;Q99755-2;Q99755-4;B4DY52;A6PW58;A2A5X0;O14986-3;O14986;O14986-2	Q99755-3;A6PW57;Q99755;Q99755-2;Q99755-4;B4DY52	11;11;11;10;10;6;1;1;1;1;1	11;11;11;10;10;6;1;1;1;1;1	2;2;2;2;2;1;1;1;0;0;0	Phosphatidylinositol 4-phosphate 5-kinase type-1 alpha	PIP5K1A	>sp|Q99755-3|PI51A_HUMAN Isoform 3 of Phosphatidylinositol 4-phosphate 5-kinase type-1 alpha OS=Homo sapiens GN=PIP5K1A;>tr|A6PW57|A6PW57_HUMAN Phosphatidylinositol 4-phosphate 5-kinase type-1 alpha OS=Homo sapiens GN=PIP5K1A PE=1 SV=2;>sp|Q99755|PI51A_HUM	11	11	11	2	9	11	8	9	11	9	9	11	8	9	11	9	2	2	2	2	2	2	23.7	23.7	7.3	61.186	549	549;550;562;500;522;198;86;101;502;540;549	6.41	10	8	10	3	5				20	24	12	15	12
A6ZKI3;Q17RB0	A6ZKI3	3;1	3;1	2;0	Protein FAM127A	FAM127A	>sp|A6ZKI3|F127A_HUMAN Protein FAM127A OS=Homo sapiens GN=FAM127A PE=1 SV=1	2	3	3	2	3	3	3	3	3	3	3	3	3	3	3	3	2	2	2	2	2	2	16.8	16.8	10.6	13.171	113	113;113	9.95									1	18	3	3	3
A8DPD7;B4DK95;Q9C0D3	A8DPD7;B4DK95;Q9C0D3	2;2;2	2;2;2	2;2;2	Protein zyg-11 homolog B	ZYG11B	>tr|A8DPD7|A8DPD7_HUMAN Protein zyg-11 homolog B OS=Homo sapiens GN=ZYG11B PE=1 SV=1;>tr|B4DK95|B4DK95_HUMAN Protein zyg-11 homolog B OS=Homo sapiens GN=ZYG11B PE=1 SV=1;>sp|Q9C0D3|ZY11B_HUMAN Protein zyg-11 homolog B OS=Homo sapiens GN=ZYG11B PE=1 SV=2	3	2	2	2	1	1	1	1	2	1	1	1	1	1	2	1	1	1	1	1	2	1	3.5	3.5	3.5	63.512	566	566;674;744	9.14					1				1	5	1	1	1
Q8IWT0;A8K0B5;Q8IWT0-2;H7C3R6	Q8IWT0;A8K0B5;Q8IWT0-2;H7C3R6	2;2;1;1	2;2;1;1	2;2;1;1	Protein archease	ZBTB8OS	>sp|Q8IWT0|ARCH_HUMAN Protein archease OS=Homo sapiens GN=ZBTB8OS PE=1 SV=2;>tr|A8K0B5|A8K0B5_HUMAN Protein archease OS=Homo sapiens GN=ZBTB8OS PE=1 SV=1;>sp|Q8IWT0-2|ARCH_HUMAN Isoform 2 of Protein archease OS=Homo sapiens GN=ZBTB8OS;>tr|H7C3R6|H7C3R6_HUM	4	2	2	2	2	2	1	1	2	2	2	2	1	1	2	2	2	2	1	1	2	2	10.2	10.2	10.2	19.491	167	167;179;136;147	5.53				4	2	6	3				2	3	2
A8K7Q2	A8K7Q2	17	1	1		HSPA8	>tr|A8K7Q2|A8K7Q2_HUMAN Heat shock cognate 71 kDa protein OS=Homo sapiens GN=HSPA8 PE=1 SV=1	1	17	1	1	16	16	13	15	15	14	0	0	0	1	0	0	0	0	0	1	0	0	44.6	2.2	2.2	45.338	410	410	8								1
A8MPX8;A8MPX8-2;A8MPX8-3	A8MPX8;A8MPX8-2;A8MPX8-3	2;1;1	2;1;1	2;1;1	Protein phosphatase 2C-like domain-containing protein 1	PP2D1	>sp|A8MPX8|PP2D1_HUMAN Protein phosphatase 2C-like domain-containing protein 1 OS=Homo sapiens GN=PP2D1 PE=2 SV=2;>sp|A8MPX8-2|PP2D1_HUMAN Isoform 2 of Protein phosphatase 2C-like domain-containing protein 1 OS=Homo sapiens GN=PP2D1;>sp|A8MPX8-3|PP2D1_HUMA	3	2	2	2	2	2	2	2	2	2	2	2	2	2	2	2	2	2	2	2	2	2	4	4	4	71.642	630	630;368;376	1.16	27	5									7	6	5
P55196;A8MQ02;P55196-5;J3KN01;P55196-6;Q5TIG5;H0Y8L4;H0Y948;H0Y8U8;H0YA98	P55196;A8MQ02;P55196-5;J3KN01;P55196-6;Q5TIG5	22;22;22;21;18;18;4;3;2;1	22;22;22;21;18;18;4;3;2;1	0;0;0;0;0;0;0;0;0;0	Afadin	MLLT4	>sp|P55196|AFAD_HUMAN Afadin OS=Homo sapiens GN=MLLT4 PE=1 SV=3;>tr|A8MQ02|A8MQ02_HUMAN Afadin OS=Homo sapiens GN=MLLT4 PE=1 SV=1;>sp|P55196-5|AFAD_HUMAN Isoform 5 of Afadin OS=Homo sapiens GN=MLLT4;>tr|J3KN01|J3KN01_HUMAN Afadin OS=Homo sapiens GN=MLLT4 P	10	22	22	0	20	19	15	19	20	18	20	19	15	19	20	18	0	0	0	0	0	0	15.5	15.5	0	206.8	1824	1824;1824;1834;1831;1651;1665;313;191;124;167	5.91	5	17	16	20	14	9	28	44	8	10	31	29	20
P14209-2;P14209-3;A8MQT7;P14209;H7C2F2	P14209-2;P14209-3;A8MQT7;P14209;H7C2F2	1;1;1;1;1	1;1;1;1;1	1;1;1;1;1	CD99 antigen	CD99	>sp|P14209-2|CD99_HUMAN Isoform II of CD99 antigen OS=Homo sapiens GN=CD99;>sp|P14209-3|CD99_HUMAN Isoform 3 of CD99 antigen OS=Homo sapiens GN=CD99;>tr|A8MQT7|A8MQT7_HUMAN CD99 antigen OS=Homo sapiens GN=CD99 PE=4 SV=1;>sp|P14209|CD99_HUMAN CD99 antigen O	5	1	1	1	1	1	1	1	1	1	1	1	1	1	1	1	1	1	1	1	1	1	19.4	19.4	19.4	16.015	160	160;169;177;185;201	2		10									2	2	1
Q9BY42;A8MSH5;A2A2L5;A2A2L6	Q9BY42;A8MSH5;A2A2L5;A2A2L6	4;4;3;2	4;4;3;2	4;4;3;2	Protein RTF2 homolog	RTFDC1	>sp|Q9BY42|RTF2_HUMAN Protein RTF2 homolog OS=Homo sapiens GN=RTFDC1 PE=1 SV=3;>tr|A8MSH5|A8MSH5_HUMAN Protein RTF2 homolog OS=Homo sapiens GN=RTFDC1 PE=1 SV=2;>tr|A2A2L5|A2A2L5_HUMAN Protein RTF2 homolog (Fragment) OS=Homo sapiens GN=RTFDC1 PE=1 SV=1;>tr|	4	4	4	4	4	4	4	4	4	4	4	4	4	4	4	4	4	4	4	4	4	4	16	16	16	33.886	306	306;336;277;230	4.21	6	4	3	11	18	11					7	9	9
A8MT19	A8MT19	10	1	1	Putative rhophilin-2-like protein RHPN2P1	RHPN2P1	>sp|A8MT19|RHN2P_HUMAN Putative rhophilin-2-like protein RHPN2P1 OS=Homo sapiens GN=RHPN2P1 PE=5 SV=2	1	10	1	1	8	10	8	7	9	9	1	1	1	1	1	1	1	1	1	1	1	1	20.9	3.1	3.1	65.944	583	583	7							6				1	1	1
A8MT37;P49840;M0QYV0	A8MT37;P49840;M0QYV0	11;11;6	6;6;4	6;6;4	Glycogen synthase kinase-3 alpha	GSK3A	>tr|A8MT37|A8MT37_HUMAN Glycogen synthase kinase-3 alpha OS=Homo sapiens GN=GSK3A PE=1 SV=2;>sp|P49840|GSK3A_HUMAN Glycogen synthase kinase-3 alpha OS=Homo sapiens GN=GSK3A PE=1 SV=2;>tr|M0QYV0|M0QYV0_HUMAN Uncharacterized protein (Fragment) OS=Homo sapien	3	11	6	6	8	10	8	10	9	10	4	6	4	5	5	5	4	6	4	5	5	5	29.9	19.2	19.2	44.919	401	401;483;167	6.52				4	5	16	11			6	4	7	5
A8MTK3;Q9NUX5;V9GY10;H7C0Z6;H7C4C7;Q5MJ35;Q5MJ34;Q9NUX5-2;B7Z7M5	A8MTK3;Q9NUX5;V9GY10;H7C0Z6;H7C4C7;Q5MJ35;Q5MJ34;Q9NUX5-2;B7Z7M5	2;2;1;1;1;1;1;1;1	2;2;1;1;1;1;1;1;1	2;2;1;1;1;1;1;1;1	Protection of telomeres protein 1	POT1	>tr|A8MTK3|A8MTK3_HUMAN POT1 protection of telomeres 1 homolog (S. pombe), isoform CRA_a OS=Homo sapiens GN=POT1 PE=4 SV=1;>sp|Q9NUX5|POTE1_HUMAN Protection of telomeres protein 1 OS=Homo sapiens GN=POT1 PE=1 SV=1;>tr|V9GY10|V9GY10_HUMAN Protection of telo	9	2	2	2	2	2	2	2	1	2	2	2	2	2	1	2	2	2	2	2	1	2	5.8	5.8	5.8	56.816	503	503;634;77;85;138;340;518;538;580	4.31		1	6	4		2	3				3	3	3
P61956-2;P61956;H7BZT4;P55854;A8MUA9;P55854-2;A8MU27;Q6EEV6	P61956-2;P61956;H7BZT4;P55854;A8MUA9;P55854-2;A8MU27;Q6EEV6	2;2;2;2;2;2;2;1	2;2;2;2;2;2;2;1	2;2;2;2;2;2;2;1	Small ubiquitin-related modifier 2;Small ubiquitin-related modifier 3;Small ubiquitin-related modifier 4	SUMO2;SUMO3;SUMO4	>sp|P61956-2|SUMO2_HUMAN Isoform 2 of Small ubiquitin-related modifier 2 OS=Homo sapiens GN=SUMO2;>sp|P61956|SUMO2_HUMAN Small ubiquitin-related modifier 2 OS=Homo sapiens GN=SUMO2 PE=1 SV=3;>tr|H7BZT4|H7BZT4_HUMAN Uncharacterized protein OS=Homo sapiens P	8	2	2	2	2	2	2	2	2	2	2	2	2	2	2	2	2	2	2	2	2	2	26.8	26.8	26.8	8.1111	71	71;95;95;103;135;141;147;95	3.97		6	6	8	6	2	1	1			5	4	5
A8MU44;Q9UJC3;B1AK95	A8MU44;Q9UJC3	15;15;1	15;15;1	15;15;1	Protein Hook homolog 1	HOOK1	>tr|A8MU44|A8MU44_HUMAN Protein Hook homolog 1 OS=Homo sapiens GN=HOOK1 PE=1 SV=2;>sp|Q9UJC3|HOOK1_HUMAN Protein Hook homolog 1 OS=Homo sapiens GN=HOOK1 PE=1 SV=2	3	15	15	15	14	14	11	14	11	13	14	14	11	14	11	13	14	14	11	14	11	13	26.4	26.4	26.4	80.021	686	686;728;137	3.07	29	40	9	12	6	6	1	5		5	22	20	17
F8WDS8;C9J0U9;D3YTH5;Q53HC9;A8MUM1;F8WDX0;F8WB12	F8WDS8;C9J0U9;D3YTH5;Q53HC9;A8MUM1;F8WDX0;F8WB12	3;3;3;3;3;2;2	3;3;3;3;3;2;2	3;3;3;3;3;2;2	Protein TSSC1	TSSC1	>tr|F8WDS8|F8WDS8_HUMAN Protein TSSC1 OS=Homo sapiens GN=TSSC1 PE=1 SV=1;>tr|C9J0U9|C9J0U9_HUMAN Protein TSSC1 (Fragment) OS=Homo sapiens GN=TSSC1 PE=1 SV=1;>tr|D3YTH5|D3YTH5_HUMAN Protein TSSC1 OS=Homo sapiens GN=TSSC1 PE=1 SV=1;>sp|Q53HC9|TSSC1_HUMAN Pro	7	3	3	3	2	2	3	2	2	2	2	2	3	2	2	2	2	2	3	2	2	2	31.8	31.8	31.8	15.131	132	132;155;314;387;414;58;87	7.95	1							12	6		3	3	4
C9JZ85;A8MV29;E7EU78;C9J1R1;Q9Y6K9;Q9Y6K9-2;F8W9A9;C9JN51;C9J2V2;C9JH59;Q9Y6K9-3	C9JZ85;A8MV29;E7EU78;C9J1R1;Q9Y6K9;Q9Y6K9-2;F8W9A9;C9JN51	4;4;4;4;4;4;3;2;1;1;1	4;4;4;4;4;4;3;2;1;1;1	4;4;4;4;4;4;3;2;1;1;1	NF-kappa-B essential modulator	IKBKG	>tr|C9JZ85|C9JZ85_HUMAN NF-kappa-B essential modulator (Fragment) OS=Homo sapiens GN=IKBKG PE=1 SV=1;>tr|A8MV29|A8MV29_HUMAN NF-kappa-B essential modulator OS=Homo sapiens GN=IKBKG PE=1 SV=2;>tr|E7EU78|E7EU78_HUMAN NF-kappa-B essential modulator OS=Homo sa	11	4	4	4	3	4	3	3	1	2	3	4	3	3	1	2	3	4	3	3	1	2	26.3	26.3	26.3	21.653	190	190;411;412;418;419;487;368;250;195;205;320	2.88	7	8		5	2			2			4	5	4
A8MVI8;Q6NW34-2;Q6NW34;E9PFF8	A8MVI8;Q6NW34-2;Q6NW34	3;3;3;1	3;3;3;1	3;3;3;1	Uncharacterized protein C3orf17	C3orf17	>tr|A8MVI8|A8MVI8_HUMAN Chromosome 3 open reading frame 17, isoform CRA_c OS=Homo sapiens GN=C3orf17 PE=1 SV=1;>sp|Q6NW34-2|CC017_HUMAN Isoform 2 of Uncharacterized protein C3orf17 OS=Homo sapiens GN=C3orf17;>sp|Q6NW34|CC017_HUMAN Uncharacterized protein C	4	3	3	3	1	2	2	2	3	2	1	2	2	2	3	2	1	2	2	2	3	2	7	7	7	49.593	431	431;497;567;238	6.06		2		1	2	4	1	6			1	2	2
O43660-2;O43660;A8MW61;H0YA24;D6RA26;H0YAA2;B7Z982	O43660-2;O43660;A8MW61;H0YA24	10;10;10;5;3;2;2	10;10;10;5;3;2;2	10;10;10;5;3;2;2	Pleiotropic regulator 1	PLRG1	>sp|O43660-2|PLRG1_HUMAN Isoform 2 of Pleiotropic regulator 1 OS=Homo sapiens GN=PLRG1;>sp|O43660|PLRG1_HUMAN Pleiotropic regulator 1 OS=Homo sapiens GN=PLRG1 PE=1 SV=1;>tr|A8MW61|A8MW61_HUMAN Pleiotropic regulator 1 OS=Homo sapiens GN=PLRG1 PE=4 SV=1;>tr|	7	10	10	10	9	9	9	9	8	8	9	9	9	9	8	8	9	9	9	9	8	8	23	23	23	56.289	505	505;514;514;156;212;106;131	6.74		6	11	4	6	19	11	4	27	11	18	19	16
P62308;A8MWD9;Q49AN9;F5H013;C9JVQ0	P62308;A8MWD9;Q49AN9;F5H013;C9JVQ0	3;3;2;2;2	3;3;2;2;2	3;3;2;2;2	Small nuclear ribonucleoprotein G;Small nuclear ribonucleoprotein G-like protein	SNRPG	>sp|P62308|RUXG_HUMAN Small nuclear ribonucleoprotein G OS=Homo sapiens GN=SNRPG PE=1 SV=1;>sp|A8MWD9|RUXGL_HUMAN Putative small nuclear ribonucleoprotein G-like protein 15 OS=Homo sapiens GN=SNRPGP15 PE=5 SV=2;>tr|Q49AN9|Q49AN9_HUMAN SNRPG protein OS=Homo	5	3	3	3	3	3	3	3	3	3	3	3	3	3	3	3	3	3	3	3	3	3	34.2	34.2	34.2	8.496	76	76;76;64;68;96	5.49	6		1	24	21	6	6	6	6	6	15	15	14
A8MX75;P18074;P18074-2;E7EVE9;K7ENL1;K7EIT8;B4E0F6;K7EKF3	A8MX75;P18074;P18074-2;E7EVE9;K7ENL1;K7EIT8	5;5;4;4;3;3;2;1	5;5;4;4;3;3;2;1	5;5;4;4;3;3;2;1	TFIIH basal transcription factor complex helicase XPD subunit	ERCC2	>tr|A8MX75|A8MX75_HUMAN TFIIH basal transcription factor complex helicase XPD subunit (Fragment) OS=Homo sapiens GN=ERCC2 PE=1 SV=2;>sp|P18074|ERCC2_HUMAN TFIIH basal transcription factor complex helicase XPD subunit OS=Homo sapiens GN=ERCC2 PE=1 SV=1;>sp|	8	5	5	5	4	5	4	5	4	4	4	5	4	5	4	4	4	5	4	5	4	4	7.2	7.2	7.2	80.511	706	706;760;405;682;109;292;127;202	6.38		6	1		1	7	3	1	6	4	4	6	5
Q9Y343-2;Q9Y343;A8MXB7;H0YA25;Q8WUS9;Q96L94	Q9Y343-2;Q9Y343;A8MXB7;H0YA25;Q8WUS9;Q96L94	2;2;2;1;1;1	2;2;2;1;1;1	2;2;2;1;1;1	Sorting nexin-24;Sorting nexin-22	SNX24;SNX22	>sp|Q9Y343-2|SNX24_HUMAN Isoform 2 of Sorting nexin-24 OS=Homo sapiens GN=SNX24;>sp|Q9Y343|SNX24_HUMAN Sorting nexin-24 OS=Homo sapiens GN=SNX24 PE=1 SV=1;>tr|A8MXB7|A8MXB7_HUMAN Sorting nexin-24 OS=Homo sapiens GN=SNX24 PE=1 SV=1;>tr|H0YA25|H0YA25_HUMAN S	6	2	2	2	1	2	0	2	1	2	1	2	0	2	1	2	1	2	0	2	1	2	11.3	11.3	11.3	18.603	159	159;169;202;68;120;193	7.38			3							5	1	2
P43243;A8MXP9;D6REM6;D6R991;H0Y8T4;B3KM87;P43243-2;D6R8Z5;D6RBI2;D6RE02;D6RIA2;D6RB45;D6RGW7;D6R9F3;D6RAM9;D6RAY2;D6RBS2;D6RCM3;D6REK4;D6RBK5	P43243;A8MXP9;D6REM6;D6R991;H0Y8T4	21;21;18;14;11;10;10;3;3;3;3;2;2;2;2;2;2;2;2;2	21;21;18;14;11;10;10;3;3;3;3;2;2;2;2;2;2;2;2;2	21;21;18;14;11;10;10;3;3;3;3;2;2;2;2;2;2;2;2;2	Matrin-3	MATR3	>sp|P43243|MATR3_HUMAN Matrin-3 OS=Homo sapiens GN=MATR3 PE=1 SV=2;>tr|A8MXP9|A8MXP9_HUMAN Matrin-3 OS=Homo sapiens GN=MATR3 PE=1 SV=1;>tr|D6REM6|D6REM6_HUMAN Matrin-3 OS=Homo sapiens GN=MATR3 PE=1 SV=1;>tr|D6R991|D6R991_HUMAN Matrin-3 (Fragment) OS=Homo s	20	21	21	21	21	21	19	21	21	20	21	21	19	21	21	20	21	21	19	21	21	20	34	34	34	94.622	847	847;895;794;433;334;509;559;107;109;124;172;47;77;78;81;86;87;99;100;121	5.74	15	61	32	18	18	29	18	49	46	33	50	54	50
Q9Y608-2;Q9Y608-4;A8MXR0;Q9Y608;H7C3N9;C9JSU1;C9JJC9;C9JC17;C9J321;C9J0U5;Q9Y608-3	Q9Y608-2;Q9Y608-4;A8MXR0;Q9Y608;H7C3N9;C9JSU1	4;4;4;4;2;2;1;1;1;1;1	4;4;4;4;2;2;1;1;1;1;1	4;4;4;4;2;2;1;1;1;1;1	Leucine-rich repeat flightless-interacting protein 2	LRRFIP2	>sp|Q9Y608-2|LRRF2_HUMAN Isoform 2 of Leucine-rich repeat flightless-interacting protein 2 OS=Homo sapiens GN=LRRFIP2;>sp|Q9Y608-4|LRRF2_HUMAN Isoform 4 of Leucine-rich repeat flightless-interacting protein 2 OS=Homo sapiens GN=LRRFIP2;>tr|A8MXR0|A8MXR0_HU	11	4	4	4	2	1	2	4	2	2	2	1	2	4	2	2	2	1	2	4	2	2	11.5	11.5	11.5	45.413	400	400;424;503;721;182;225;59;59;59;67;100	2.14	1	11	1	1							2	2	2
A8MXV4	A8MXV4	6	6	6	Nucleoside diphosphate-linked moiety X motif 19, mitochondrial	NUDT19	>sp|A8MXV4|NUD19_HUMAN Nucleoside diphosphate-linked moiety X motif 19, mitochondrial OS=Homo sapiens GN=NUDT19 PE=1 SV=1	1	6	6	6	5	6	4	4	5	4	5	6	4	4	5	4	5	6	4	4	5	4	21.3	21.3	21.3	42.233	375	375	4.6	6	3	4	2	6	5	3	6			7	8	5
J9JIE0;Q9NQ84;Q9NQ84-2;A8MXZ4	J9JIE0;Q9NQ84;Q9NQ84-2;A8MXZ4	3;3;3;3	3;3;3;3	3;3;3;3	G-protein coupled receptor family C group 5 member C	GPRC5C	>tr|J9JIE0|J9JIE0_HUMAN G-protein-coupled receptor family C group 5 member C OS=Homo sapiens GN=GPRC5C PE=1 SV=1;>sp|Q9NQ84|GPC5C_HUMAN G-protein coupled receptor family C group 5 member C OS=Homo sapiens GN=GPRC5C PE=1 SV=2;>sp|Q9NQ84-2|GPC5C_HUMAN Isofor	4	3	3	3	2	3	2	2	3	3	2	3	2	2	3	3	2	3	2	2	3	3	26.2	26.2	26.2	13.955	126	126;441;453;462	2.63	4	3	8	4							2	4	2
A8MY48;P53778-2;P53778	A8MY48;P53778-2;P53778	1;1;1	1;1;1	1;1;1	Mitogen-activated protein kinase 12	MAPK12	>tr|A8MY48|A8MY48_HUMAN Mitogen-activated protein kinase 12 OS=Homo sapiens GN=MAPK12 PE=4 SV=1;>sp|P53778-2|MK12_HUMAN Isoform 2 of Mitogen-activated protein kinase 12 OS=Homo sapiens GN=MAPK12;>sp|P53778|MK12_HUMAN Mitogen-activated protein kinase 12 OS=	3	1	1	1	1	1	1	1	1	1	1	1	1	1	1	1	1	1	1	1	1	1	7.6	7.6	7.6	13.413	119	119;357;367	7						4	6	4			3	3	2
J3QLD1;J3KSB8;J3QRZ6;A9UHW6;J3QLJ5;J3QLN4;J3KSU6;J3QKW3;A9UHW6-2;A9UHW6-3	J3QLD1;J3KSB8;J3QRZ6;A9UHW6;J3QLJ5;J3QLN4;J3KSU6;J3QKW3;A9UHW6-2;A9UHW6-3	2;2;2;2;2;1;1;1;1;1	2;2;2;2;2;1;1;1;1;1	2;2;2;2;2;1;1;1;1;1	MIF4G domain-containing protein	MIF4GD	>tr|J3QLD1|J3QLD1_HUMAN MIF4G domain-containing protein (Fragment) OS=Homo sapiens GN=MIF4GD PE=1 SV=1;>tr|J3KSB8|J3KSB8_HUMAN MIF4G domain-containing protein OS=Homo sapiens GN=MIF4GD PE=1 SV=1;>tr|J3QRZ6|J3QRZ6_HUMAN MIF4G domain-containing protein (Frag	10	2	2	2	2	2	2	2	2	2	2	2	2	2	2	2	2	2	2	2	2	2	28.9	28.9	28.9	10.175	90	90;170;204;222;251;41;155;169;256;263	2	6		6								2	2	2
Q8IYB3-2;Q8IYB3;A9Z1X7;E9PCT1;M0R088;B4DED5;M0R1E7;M0QXG5	Q8IYB3-2;Q8IYB3;A9Z1X7;E9PCT1;M0R088	8;8;8;8;6;3;2;1	8;8;8;8;6;3;2;1	8;8;8;8;6;3;2;1	Serine/arginine repetitive matrix protein 1	SRRM1	>sp|Q8IYB3-2|SRRM1_HUMAN Isoform 2 of Serine/arginine repetitive matrix protein 1 OS=Homo sapiens GN=SRRM1;>sp|Q8IYB3|SRRM1_HUMAN Serine/arginine repetitive matrix protein 1 OS=Homo sapiens GN=SRRM1 PE=1 SV=2;>tr|A9Z1X7|A9Z1X7_HUMAN Serine/arginine repetit	8	8	8	8	8	8	8	8	8	7	8	8	8	8	8	7	8	8	8	8	8	7	11.4	11.4	11.4	102.12	902	902;904;913;916;681;318;79;101	3.68	16	33			12	8		5	2	5	13	13	13
B0FLL2;O60825;O60825-2;B4DY91;B4DI16	B0FLL2;O60825;O60825-2;B4DY91;B4DI16	25;25;24;22;16	25;25;24;22;16	20;20;19;18;13	6-phosphofructo-2-kinase/fructose-2,6-bisphosphatase 2;6-phosphofructo-2-kinase;Fructose-2,6-bisphosphatase	PFKFB2	>tr|B0FLL2|B0FLL2_HUMAN 6-phosphofructo-2-kinase/fructose-2, 6-bisphosphatase 2 transcript variant 3 OS=Homo sapiens GN=PFKFB2 PE=1 SV=1;>sp|O60825|F262_HUMAN 6-phosphofructo-2-kinase/fructose-2,6-bisphosphatase 2 OS=Homo sapiens GN=PFKFB2 PE=1 SV=2;>sp|O6	5	25	25	20	22	23	24	23	23	22	22	23	24	23	23	22	19	20	20	20	19	19	52.5	52.5	41.5	54.777	472	472;505;471;373;264	4.48	8	58	27	27	26	20	10	11	15	9	34	34	38
B0QXZ6;O95503	B0QXZ6;O95503	4;4	4;4	4;4	Chromobox protein homolog 6	CBX6	>tr|B0QXZ6|B0QXZ6_HUMAN Chromobox protein homolog 6 OS=Homo sapiens GN=CBX6 PE=1 SV=1;>sp|O95503|CBX6_HUMAN Chromobox protein homolog 6 OS=Homo sapiens GN=CBX6 PE=1 SV=1	2	4	4	4	2	3	4	3	3	2	2	3	4	3	3	2	2	3	4	3	3	2	10.7	10.7	10.7	41.918	394	394;412	4.57		3	6	5	6	7	3				4	6	7
B0QXZ8;B0QXZ9;Q9UGU5	B0QXZ8;B0QXZ9;Q9UGU5	1;1;1	1;1;1	1;1;1	HMG domain-containing protein 4	HMGXB4	>tr|B0QXZ8|B0QXZ8_HUMAN HMG domain-containing protein 4 (Fragment) OS=Homo sapiens GN=HMGXB4 PE=1 SV=1;>tr|B0QXZ9|B0QXZ9_HUMAN HMG domain-containing protein 4 (Fragment) OS=Homo sapiens GN=HMGXB4 PE=1 SV=1;>sp|Q9UGU5|HMGX4_HUMAN HMG domain-containing prote	3	1	1	1	1	1	1	1	1	1	1	1	1	1	1	1	1	1	1	1	1	1	6	6	6	30.39	284	284;285;601	6.71						2	5				1	1	1
B0QY29;Q9NWS6;B0QY28	B0QY29;Q9NWS6;B0QY28	3;3;2	3;3;2	3;3;2	Protein FAM118A	FAM118A	>tr|B0QY29|B0QY29_HUMAN Protein FAM118A OS=Homo sapiens GN=FAM118A PE=1 SV=1;>sp|Q9NWS6|F118A_HUMAN Protein FAM118A OS=Homo sapiens GN=FAM118A PE=1 SV=2;>tr|B0QY28|B0QY28_HUMAN Protein FAM118A (Fragment) OS=Homo sapiens GN=FAM118A PE=1 SV=1	3	3	3	3	3	3	2	2	3	3	3	3	2	2	3	3	3	3	2	2	3	3	13.4	13.4	13.4	22.483	202	202;357;139	7.55						3	11	2		4	3	5	2
Q9Y262;B0QY89;Q9Y262-2;B0QY90;C9JHP4;C9K0Q7;H7C3A0;H0Y7E6	Q9Y262;B0QY89;Q9Y262-2;B0QY90	23;23;22;17;7;7;4;2	23;23;22;17;7;7;4;2	23;23;22;17;7;7;4;2	Eukaryotic translation initiation factor 3 subunit L	EIF3L	>sp|Q9Y262|EIF3L_HUMAN Eukaryotic translation initiation factor 3 subunit L OS=Homo sapiens GN=EIF3L PE=1 SV=1;>tr|B0QY89|B0QY89_HUMAN Eukaryotic translation initiation factor 3 subunit L OS=Homo sapiens GN=EIF3L PE=1 SV=1;>sp|Q9Y262-2|EIF3L_HUMAN Isoform	8	23	23	23	23	23	20	21	22	22	23	23	20	21	22	22	23	23	20	21	22	22	45.9	45.9	45.9	66.726	564	564;607;516;466;150;183;127;109	5.03	17	29	62	36	31	23	21	28	26	14	50	49	48
Q9UH17;B0QYD3;P31941-2;P31941;Q9UH17-3;Q9UH17-2	Q9UH17;B0QYD3;P31941-2;P31941;Q9UH17-3	4;4;3;3;3;1	4;4;3;3;3;1	4;4;3;3;3;1	DNA dC->dU-editing enzyme APOBEC-3B;DNA dC->dU-editing enzyme APOBEC-3A	APOBEC3B;APOBEC3A	>sp|Q9UH17|ABC3B_HUMAN DNA dC->dU-editing enzyme APOBEC-3B OS=Homo sapiens GN=APOBEC3B PE=1 SV=1;>tr|B0QYD3|B0QYD3_HUMAN DNA dC->dU-editing enzyme APOBEC-3B OS=Homo sapiens GN=APOBEC3B PE=4 SV=1;>sp|P31941-2|ABC3A_HUMAN Isoform 2 of DNA dC->dU-editing enzy	6	4	4	4	2	2	2	1	3	3	2	2	2	1	3	3	2	2	2	1	3	3	9.9	9.9	9.9	45.924	382	382;490;187;199;357;251	5.13		1	7	2					4	1	3	2	2
B0QYH2;Q8IWL3	B0QYH2;Q8IWL3	2;2	2;2	2;2	Iron-sulfur cluster co-chaperone protein HscB, mitochondrial	HSCB	>tr|B0QYH2|B0QYH2_HUMAN Iron-sulfur cluster co-chaperone protein HscB, mitochondrial OS=Homo sapiens GN=HSCB PE=1 SV=1;>sp|Q8IWL3|HSC20_HUMAN Iron-sulfur cluster co-chaperone protein HscB, mitochondrial OS=Homo sapiens GN=HSCB PE=1 SV=3	2	2	2	2	1	2	2	1	2	1	1	2	2	1	2	1	1	2	2	1	2	1	14	14	14	16.529	143	143;235	7.31		3	1						12		2	3	4
Q01844-6;B0QYK0;Q01844-3;Q01844;Q01844-5;H7BY36;Q01844-2;C9JGE3;Q01844-4	Q01844-6;B0QYK0;Q01844-3;Q01844;Q01844-5;H7BY36;Q01844-2;C9JGE3	5;5;5;5;5;4;4;4;1	5;5;5;5;5;4;4;4;1	5;5;5;5;5;4;4;4;1	RNA-binding protein EWS	EWSR1	>sp|Q01844-6|EWS_HUMAN Isoform 6 of RNA-binding protein EWS OS=Homo sapiens GN=EWSR1;>tr|B0QYK0|B0QYK0_HUMAN RNA-binding protein EWS OS=Homo sapiens GN=EWSR1 PE=1 SV=1;>sp|Q01844-3|EWS_HUMAN Isoform 3 of RNA-binding protein EWS OS=Homo sapiens GN=EWSR1;>sp	9	5	5	5	4	4	4	4	3	4	4	4	4	4	3	4	4	4	4	4	3	4	11	11	11	62.507	600	600;618;655;656;661;308;583;583;354	4.02	3	10	11	5	13	14					11	10	8
S4R469;F8VR27;F8VZY7;B0QYV1;O43251-9;Q9NWB1-3;O43251-4;B0QYY4;O43251-5;O43251-10;O43251-2;O43251;Q9NWB1-4;Q9NWB1-5;Q9NWB1;O43251-7;J3KNW3;Q9NWB1-2;B7Z1U7;O43251-6;O43251-8;F8VZG9;I3L1D4;O43251-3;F8VRS4;B0QYY7;S4R3K7;A6NFN3;B4DF29;J3QRF4;B0QYY6;J3QQZ2	S4R469;F8VR27;F8VZY7;B0QYV1;O43251-9;Q9NWB1-3;O43251-4;B0QYY4;O43251-5;O43251-10;O43251-2;O43251;Q9NWB1-4;Q9NWB1-5;Q9NWB1;O43251-7;J3KNW3;Q9NWB1-2;B7Z1U7;O43251-6;O43251-8;F8VZG9;I3L1D4;O43251-3;F8VRS4;B0QYY7;S4R3K7;A6NFN3;B4DF29;J3QRF4	5;5;5;5;5;5;5;5;5;5;5;5;5;5;5;5;5;5;5;5;5;5;4;4;4;3;3;3;3;3;2;2	5;5;5;5;5;5;5;5;5;5;5;5;5;5;5;5;5;5;5;5;5;5;4;4;4;3;3;3;3;3;2;2	5;5;5;5;5;5;5;5;5;5;5;5;5;5;5;5;5;5;5;5;5;5;4;4;4;3;3;3;3;3;2;2	RNA binding protein fox-1 homolog;RNA binding protein fox-1 homolog 2;RNA binding protein fox-1 homolog 1;RNA binding protein fox-1 homolog 3	RBFOX1;RBM9;RBFOX2;RBFOX3	>tr|S4R469|S4R469_HUMAN RNA-binding protein fox-1 homolog 2 (Fragment) OS=Homo sapiens GN=RBFOX2 PE=4 SV=1;>tr|F8VR27|F8VR27_HUMAN RNA-binding protein fox-1 homolog 1 (Fragment) OS=Homo sapiens GN=RBFOX1 PE=4 SV=1;>tr|F8VZY7|F8VZY7_HUMAN RNA-binding protei	32	5	5	5	5	5	5	5	5	4	5	5	5	5	5	4	5	5	5	5	5	4	18.8	18.8	18.8	25.265	234	234;262;263;357;367;370;370;370;376;380;381;390;392;395;397;400;402;418;425;450;451;466;189;358;391;200;230;312;325;358;128;328	6.21		12	9	5					12	15	8	10	8
B0QZ43	B0QZ43	6	1	1		ERLIN1	>tr|B0QZ43|B0QZ43_HUMAN Erlin-1 (Fragment) OS=Homo sapiens GN=ERLIN1 PE=1 SV=1	1	6	1	1	6	6	6	6	6	6	1	1	1	1	1	1	1	1	1	1	1	1	25.5	2.5	2.5	31.077	275	275	2.5		4	4								1	1	2
P02656;B0YIW2	P02656;B0YIW2	1;1	1;1	1;1	Apolipoprotein C-III	APOC3	>sp|P02656|APOC3_HUMAN Apolipoprotein C-III OS=Homo sapiens GN=APOC3 PE=1 SV=1;>tr|B0YIW2|B0YIW2_HUMAN Apolipoprotein C-III OS=Homo sapiens GN=APOC3 PE=1 SV=1	2	1	1	1	1	1	1	1	1	1	1	1	1	1	1	1	1	1	1	1	1	1	16.2	16.2	16.2	10.852	99	99;117	2.07		14	1								4	2	2
P85298-2;P85298-5;P85298-4;P85298-3;P85298;H0Y9T8;F8W6F3;B1AHC3;B1AHC4;B1AHC2;B1AHF8;F8WCV8	P85298-2;P85298-5;P85298-4;P85298-3;P85298;H0Y9T8;F8W6F3;B1AHC3;B1AHC4;B1AHC2;B1AHF8;F8WCV8	4;4;4;4;4;4;4;4;4;2;2;2	4;4;4;4;4;4;4;4;4;2;2;2	4;4;4;4;4;4;4;4;4;2;2;2	Rho GTPase-activating protein 8	ARHGAP8;PRR5-ARHGAP8	>sp|P85298-2|RHG08_HUMAN Isoform 2 of Rho GTPase-activating protein 8 OS=Homo sapiens GN=ARHGAP8;>sp|P85298-5|RHG08_HUMAN Isoform 5 of Rho GTPase-activating protein 8 OS=Homo sapiens GN=ARHGAP8;>sp|P85298-4|RHG08_HUMAN Isoform 4 of Rho GTPase-activating pr	12	4	4	4	3	2	2	2	2	3	3	2	2	2	2	3	3	2	2	2	2	3	15.3	15.3	15.3	34.304	294	294;305;433;459;464;504;555;564;643;115;130;163	4.52		7	8	5			6	5			7	5	4
P55769;B1AHD1	P55769;B1AHD1	5;5	5;5	5;5	NHP2-like protein 1	NHP2L1	>sp|P55769|NH2L1_HUMAN NHP2-like protein 1 OS=Homo sapiens GN=NHP2L1 PE=1 SV=3;>tr|B1AHD1|B1AHD1_HUMAN NHP2-like protein 1 OS=Homo sapiens GN=NHP2L1 PE=1 SV=1	2	5	5	5	5	4	5	5	5	5	5	4	5	5	5	5	5	4	5	5	5	5	41.4	41.4	41.4	14.173	128	128;132	5.32		8	17	2				18	3	2	10	9	10
P23142-4;B1AHL2;P23142-2;P23142-3;P23142;F8W7M9	P23142-4;B1AHL2	4;4;1;1;1;1	4;4;1;1;1;1	4;4;1;1;1;1		FBLN1	>sp|P23142-4|FBLN1_HUMAN Isoform C of Fibulin-1 OS=Homo sapiens GN=FBLN1;>tr|B1AHL2|B1AHL2_HUMAN Fibulin-1 OS=Homo sapiens GN=FBLN1 PE=3 SV=1	6	4	4	4	3	4	4	4	4	4	3	4	4	4	4	4	3	4	4	4	4	4	7.6	7.6	7.6	74.433	683	683;721;566;601;703;703	5.76		1	5	6	7	12	4			6	7	6	7
B1AJY5;B1AJY7;O75832;B1AJY6;O75832-2	B1AJY5;B1AJY7;O75832	5;5;5;1;1	5;5;5;1;1	5;5;5;1;1	26S proteasome non-ATPase regulatory subunit 10	PSMD10	>tr|B1AJY5|B1AJY5_HUMAN 26S proteasome non-ATPase regulatory subunit 10 OS=Homo sapiens GN=PSMD10 PE=1 SV=1;>tr|B1AJY7|B1AJY7_HUMAN 26S proteasome non-ATPase regulatory subunit 10 OS=Homo sapiens GN=PSMD10 PE=1 SV=1;>sp|O75832|PSD10_HUMAN 26S proteasome no	5	5	5	5	5	5	4	3	4	4	5	5	4	3	4	4	5	5	4	3	4	4	37.3	37.3	37.3	20.217	185	185;193;226;110;151	4.08	6		12	10			7			2	7	7	7
B1AK13;P35914;P35914-3;P35914-2;H0Y2L7;G5E9S9;B7Z4D4;B7Z212;Q8TB92-5;Q8TB92-2;Q8TB92	B1AK13;P35914;P35914-3;P35914-2	10;10;6;6;2;1;1;1;1;1;1	10;10;6;6;2;1;1;1;1;1;1	10;10;6;6;2;1;1;1;1;1;1	Hydroxymethylglutaryl-CoA lyase, mitochondrial	HMGCL	>tr|B1AK13|B1AK13_HUMAN 3-hydroxymethyl-3-methylglutaryl-Coenzyme A lyase (Hydroxymethylglutaricaciduria), isoform CRA_b OS=Homo sapiens GN=HMGCL PE=1 SV=1;>sp|P35914|HMGCL_HUMAN Hydroxymethylglutaryl-CoA lyase, mitochondrial OS=Homo sapiens GN=HMGCL PE=1	11	10	10	10	10	10	8	9	8	10	10	10	8	9	8	10	10	10	8	9	8	10	41.7	41.7	41.7	31.735	300	300;325;191;254;182;151;174;237;308;340;370	5.13		20	24	16	5		6	11	8	12	17	20	16
Q9UJF2;B1AKC7;Q9UJF2-2;H0Y638	Q9UJF2;B1AKC7;Q9UJF2-2;H0Y638	7;7;7;5	7;7;7;5	6;6;6;5	Ras GTPase-activating protein nGAP	RASAL2	>sp|Q9UJF2|NGAP_HUMAN Ras GTPase-activating protein nGAP OS=Homo sapiens GN=RASAL2 PE=1 SV=2;>tr|B1AKC7|B1AKC7_HUMAN Ras GTPase-activating protein nGAP OS=Homo sapiens GN=RASAL2 PE=1 SV=1;>sp|Q9UJF2-2|NGAP_HUMAN Isoform 2 of Ras GTPase-activating protein n	4	7	7	6	7	7	7	6	7	7	7	7	7	6	7	7	6	6	6	5	6	6	6.3	6.3	5.4	128.56	1139	1139;1269;1280;693	6.04	6	1	10	6		6	3	2	17	5	10	10	8
B1AKD8;Q5TZA2-2;Q5TZA2	B1AKD8;Q5TZA2-2;Q5TZA2	1;1;1	1;1;1	1;1;1	Rootletin	CROCC	>tr|B1AKD8|B1AKD8_HUMAN Rootletin (Fragment) OS=Homo sapiens GN=CROCC PE=4 SV=2;>sp|Q5TZA2-2|CROCC_HUMAN Isoform 2 of Rootletin OS=Homo sapiens GN=CROCC;>sp|Q5TZA2|CROCC_HUMAN Rootletin OS=Homo sapiens GN=CROCC PE=1 SV=1	3	1	1	1	1	1	1	1	1	1	1	1	1	1	1	1	1	1	1	1	1	1	0.6	0.6	0.6	149.06	1311	1311;1313;2017	2.5		6	6								2	2	2
Q9NUK0-2;B1AKI6;Q9NUK0;Q9NUK0-4;Q9NUK0-3;B1AKI2;B1AKI5;B1AKI4;Q9NUK0-5	Q9NUK0-2;B1AKI6;Q9NUK0;Q9NUK0-4;Q9NUK0-3	4;4;4;3;3;1;1;1;1	1;1;1;1;1;1;1;1;1	1;1;1;1;1;1;1;1;1	Muscleblind-like protein 3	MBNL3	>sp|Q9NUK0-2|MBNL3_HUMAN Isoform 2 of Muscleblind-like protein 3 OS=Homo sapiens GN=MBNL3;>tr|B1AKI6|B1AKI6_HUMAN Muscleblind-like protein 3 OS=Homo sapiens GN=MBNL3 PE=4 SV=1;>sp|Q9NUK0|MBNL3_HUMAN Muscleblind-like protein 3 OS=Homo sapiens GN=MBNL3 PE=2	9	4	1	1	3	4	4	4	3	4	1	1	1	1	1	1	1	1	1	1	1	1	10.5	3.3	3.3	36.38	334	334;342;354;292;304;150;223;242;258	8.33								6	3		2	1	2
G3V1R5;O43847;O43847-2;B1AKJ5;F5H7V1;H0Y5G9	G3V1R5;O43847;O43847-2;B1AKJ5;F5H7V1;H0Y5G9	16;16;16;16;11;8	16;16;16;16;11;8	16;16;16;16;11;8	Nardilysin	NRD1	>tr|G3V1R5|G3V1R5_HUMAN Nardilysin OS=Homo sapiens GN=NRD1 PE=1 SV=1;>sp|O43847|NRDC_HUMAN Nardilysin OS=Homo sapiens GN=NRD1 PE=1 SV=2;>sp|O43847-2|NRDC_HUMAN Isoform 2 of Nardilysin OS=Homo sapiens GN=NRD1;>tr|B1AKJ5|B1AKJ5_HUMAN Nardilysin OS=Homo sapie	6	16	16	16	16	15	14	14	15	15	16	15	14	14	15	15	16	15	14	14	15	15	16	16	16	125.12	1087	1087;1150;1218;1219;747;538	6.45	7	14	4	3	12	18	30	17	24	12	26	26	24
Q96SU4-7;Q96SU4-2;Q96SU4;B1AKJ6;Q96SU4-6;J3KPA3;E9PJW9;Q96SU4-5;Q96SU4-4;Q96SU4-3;H0YE19;E9PKX6;H0YCW0;E9PJ80;E9PLH0;E9PNR1	Q96SU4-7;Q96SU4-2;Q96SU4;B1AKJ6;Q96SU4-6;J3KPA3;E9PJW9;Q96SU4-5;Q96SU4-4;Q96SU4-3	9;9;9;9;9;9;8;7;7;7;3;1;1;1;1;1	9;9;9;9;9;9;8;7;7;7;3;1;1;1;1;1	8;8;8;8;8;8;7;6;6;6;3;1;1;1;1;1	Oxysterol-binding protein-related protein 9;Oxysterol-binding protein	OSBPL9	>sp|Q96SU4-7|OSBL9_HUMAN Isoform 7 of Oxysterol-binding protein-related protein 9 OS=Homo sapiens GN=OSBPL9;>sp|Q96SU4-2|OSBL9_HUMAN Isoform 2 of Oxysterol-binding protein-related protein 9 OS=Homo sapiens GN=OSBPL9;>sp|Q96SU4|OSBL9_HUMAN Oxysterol-binding	16	9	9	8	8	9	8	8	8	8	8	9	8	8	8	8	7	8	7	7	7	7	14.2	14.2	13.2	81.165	719	719;723;736;741;746;754;655;558;571;626;196;32;34;41;92;109	6.67		7	6	7	2	14	18	10	6	16	15	15	13
Q15121;B1AKZ3;B1AKZ5	Q15121;B1AKZ3	4;4;1	4;4;1	4;4;1	Astrocytic phosphoprotein PEA-15	PEA15	>sp|Q15121|PEA15_HUMAN Astrocytic phosphoprotein PEA-15 OS=Homo sapiens GN=PEA15 PE=1 SV=2;>tr|B1AKZ3|B1AKZ3_HUMAN Astrocytic phosphoprotein PEA-15 OS=Homo sapiens GN=PEA15 PE=1 SV=1	3	4	4	4	4	4	4	4	4	4	4	4	4	4	4	4	4	4	4	4	4	4	36.9	36.9	36.9	15.04	130	130;151;108	7.07					3	16	27	23	2		14	13	10
Q8N983-4;Q8N983-3;H0Y6Y8;B1AL05;Q8N983-2;Q8N983;Q8N983-6;Q8N983-7;H0YBU8;M0R051	Q8N983-4;Q8N983-3;H0Y6Y8;B1AL05;Q8N983-2;Q8N983;Q8N983-6;Q8N983-7;H0YBU8	8;8;8;8;8;8;8;8;5;3	8;8;8;8;8;8;8;8;5;3	8;8;8;8;8;8;8;8;5;3	39S ribosomal protein L43, mitochondrial	MRPL43	>sp|Q8N983-4|RM43_HUMAN Isoform 4 of 39S ribosomal protein L43, mitochondrial OS=Homo sapiens GN=MRPL43;>sp|Q8N983-3|RM43_HUMAN Isoform 3 of 39S ribosomal protein L43, mitochondrial OS=Homo sapiens GN=MRPL43;>tr|H0Y6Y8|H0Y6Y8_HUMAN 39S ribosomal protein L4	10	8	8	8	7	7	6	8	8	8	7	7	6	8	8	8	7	7	6	8	8	8	49.1	49.1	49.1	17.853	159	159;164;169;184;202;215;235;261;148;44	5.33	4	17	22	6		1	12	7	4	17	14	15	15
E9PEK3;B1ALB4;E9PCE5;Q92540-2;Q92540;Q92540-5;E9PD50;Q92540-4;E9PBK2	E9PEK3;B1ALB4;E9PCE5;Q92540-2;Q92540;Q92540-5;E9PD50;Q92540-4;E9PBK2	2;2;2;2;2;2;2;2;1	2;2;2;2;2;2;2;2;1	2;2;2;2;2;2;2;2;1	Protein SMG7	SMG7	>tr|E9PEK3|E9PEK3_HUMAN Protein SMG7 OS=Homo sapiens GN=SMG7 PE=1 SV=1;>tr|B1ALB4|B1ALB4_HUMAN Protein SMG7 (Fragment) OS=Homo sapiens GN=SMG7 PE=1 SV=2;>tr|E9PCE5|E9PCE5_HUMAN Protein SMG7 OS=Homo sapiens GN=SMG7 PE=1 SV=1;>sp|Q92540-2|SMG7_HUMAN Isoform	9	2	2	2	1	2	1	2	2	2	1	2	1	2	2	2	1	2	1	2	2	2	12.5	12.5	12.5	20.583	184	184;756;1049;1091;1137;1145;1170;1178;73	2.8		2	8								1	2	1
Q14155-1;B1ALK7;B7Z6G2;Q14155-5;Q14155-6;Q14155-2;Q14155-3;Q14155;E7EUY6;E9PDQ5;E7EU80;Q15052-2;B7Z3C7;Q15052;C9JAD7;C9JDI6;B1ANY6;E7ENL8;B7Z6D9	Q14155-1;B1ALK7;B7Z6G2;Q14155-5;Q14155-6;Q14155-2;Q14155-3;Q14155;E7EUY6;E9PDQ5	11;11;11;11;9;9;9;9;7;7;2;2;2;2;1;1;1;1;1	11;11;11;11;9;9;9;9;7;7;2;2;2;2;1;1;1;1;1	11;11;11;11;9;9;9;9;7;7;2;2;2;2;1;1;1;1;1	Rho guanine nucleotide exchange factor 7	ARHGEF7	>sp|Q14155-1|ARHG7_HUMAN Isoform 1 of Rho guanine nucleotide exchange factor 7 OS=Homo sapiens GN=ARHGEF7;>tr|B1ALK7|B1ALK7_HUMAN Rho guanine nucleotide exchange factor 7 OS=Homo sapiens GN=ARHGEF7 PE=1 SV=1;>tr|B7Z6G2|B7Z6G2_HUMAN Rho guanine nucleotide e	19	11	11	11	11	10	8	10	9	7	11	10	8	10	9	7	11	10	8	10	9	7	19.7	19.7	19.7	73.139	646	646;705;721;731;625;753;782;803;447;547;151;622;649;776;39;61;66;143;181	4.58	5	19	7	4	10	23	18				18	15	12
Q9P0T7;B1ALM5	Q9P0T7;B1ALM5	1;1	1;1	1;1	Transmembrane protein 9	TMEM9	>sp|Q9P0T7|TMEM9_HUMAN Transmembrane protein 9 OS=Homo sapiens GN=TMEM9 PE=1 SV=1;>tr|B1ALM5|B1ALM5_HUMAN Transmembrane protein 9 OS=Homo sapiens GN=TMEM9 PE=1 SV=1	2	1	1	1	0	1	1	1	1	1	0	1	1	1	1	1	0	1	1	1	1	1	7.1	7.1	7.1	20.574	183	183;186	7.38							5	3				1	2
B1AMU3;Q9Y3B2;R4GNH9;R4GMQ7;B1AMU7;B1AMU4	B1AMU3;Q9Y3B2;R4GNH9;R4GMQ7;B1AMU7;B1AMU4	3;3;2;2;2;2	3;3;2;2;2;2	3;3;2;2;2;2	Exosome complex component CSL4	EXOSC1	>tr|B1AMU3|B1AMU3_HUMAN Exosome complex component CSL4 OS=Homo sapiens GN=EXOSC1 PE=1 SV=1;>sp|Q9Y3B2|EXOS1_HUMAN Exosome complex component CSL4 OS=Homo sapiens GN=EXOSC1 PE=1 SV=1;>tr|R4GNH9|R4GNH9_HUMAN Exosome complex component CSL4 OS=Homo sapiens GN=E	6	3	3	3	3	3	3	3	3	3	3	3	3	3	3	3	3	3	3	3	3	3	22.9	22.9	22.9	18.816	170	170;195;139;143;165;178	7.09		6					1	6	1	8	3	3	5
D6RCR1;B1ANS9-2;B1ANS9	D6RCR1;B1ANS9-2;B1ANS9	2;2;2	2;2;2	2;2;2	WD repeat-containing protein 64	WDR64	>tr|D6RCR1|D6RCR1_HUMAN WD repeat-containing protein 64 OS=Homo sapiens GN=WDR64 PE=4 SV=2;>sp|B1ANS9-2|WDR64_HUMAN Isoform 2 of WD repeat-containing protein 64 OS=Homo sapiens GN=WDR64;>sp|B1ANS9|WDR64_HUMAN WD repeat-containing protein 64 OS=Homo sapiens	3	2	2	2	1	1	1	2	2	1	1	1	1	2	2	1	1	1	1	2	2	1	3.8	3.8	3.8	60.443	528	528;914;1081	4.44			6	1					2		1	1	1
P08174-4;E9PSH2;P08174;P08174-3;P08174-5;P08174-2;B1AP13;P08174-6;P08174-7;H3BLV0;B1AP15;H7BY55	P08174-4;E9PSH2;P08174;P08174-3;P08174-5;P08174-2;B1AP13;P08174-6;P08174-7;H3BLV0;B1AP15	4;4;4;4;4;4;4;4;4;3;2;1	4;4;4;4;4;4;4;4;4;3;2;1	4;4;4;4;4;4;4;4;4;3;2;1	Complement decay-accelerating factor	CD55	>sp|P08174-4|DAF_HUMAN Isoform 4 of Complement decay-accelerating factor OS=Homo sapiens GN=CD55;>tr|E9PSH2|E9PSH2_HUMAN Complement decay-accelerating factor OS=Homo sapiens GN=CD55 PE=1 SV=1;>sp|P08174|DAF_HUMAN Complement decay-accelerating factor OS=Hom	12	4	4	4	3	3	4	3	3	3	3	3	4	3	3	3	3	3	4	3	3	3	10.7	10.7	10.7	39.759	364	364;377;381;384;439;440;444;525;551;326;317;129	4.38		13	6			1	6	6			5	5	7
H0Y6W5;Q6ZN30-2;F5H586;B1APH0;Q6ZN30	H0Y6W5;Q6ZN30-2;F5H586;B1APH0;Q6ZN30	1;1;1;1;1	1;1;1;1;1	1;1;1;1;1	Zinc finger protein basonuclin-2	BNC2	>tr|H0Y6W5|H0Y6W5_HUMAN Zinc finger protein basonuclin-2 (Fragment) OS=Homo sapiens GN=BNC2 PE=1 SV=1;>sp|Q6ZN30-2|BNC2_HUMAN Isoform 2 of Zinc finger protein basonuclin-2 OS=Homo sapiens GN=BNC2;>tr|F5H586|F5H586_HUMAN Zinc finger protein basonuclin-2 OS=	5	1	1	1	1	1	0	0	1	0	1	1	0	0	1	0	1	1	0	0	1	0	0.8	0.8	0.8	96.52	860	860;903;1004;1032;1099	2.25		3	1								1	1
O75335;B1APN9;J3KQI5;M0QZB5;O75335-2;O75335-1	O75335;B1APN9;J3KQI5;M0QZB5;O75335-2;O75335-1	7;7;5;5;4;4	1;1;1;1;1;1	1;1;1;1;1;1	Liprin-alpha-4	PPFIA4	>sp|O75335|LIPA4_HUMAN Liprin-alpha-4 OS=Homo sapiens GN=PPFIA4 PE=2 SV=3;>tr|B1APN9|B1APN9_HUMAN Liprin-alpha-4 OS=Homo sapiens GN=PPFIA4 PE=4 SV=2;>tr|J3KQI5|J3KQI5_HUMAN Liprin-alpha-4 OS=Homo sapiens GN=PPFIA4 PE=4 SV=1;>tr|M0QZB5|M0QZB5_HUMAN Liprin-a	6	7	1	1	6	7	6	5	7	5	1	1	0	0	1	0	1	1	0	0	1	0	6.9	1.3	1.3	134.4	1185	1185;1186;914;953;692;701	8.6								2	3		2	1
B1AT46;Q9Y692-2;Q9Y692	B1AT46;Q9Y692-2;Q9Y692	3;2;2	3;2;2	0;0;0	Glucocorticoid modulatory element-binding protein 1	GMEB1	>tr|B1AT46|B1AT46_HUMAN Glucocorticoid modulatory element-binding protein 1 (Fragment) OS=Homo sapiens GN=GMEB1 PE=4 SV=1;>sp|Q9Y692-2|GMEB1_HUMAN Isoform 2 of Glucocorticoid modulatory element-binding protein 1 OS=Homo sapiens GN=GMEB1;>sp|Q9Y692|GMEB1_HU	3	3	3	0	3	2	2	3	3	3	3	2	2	3	3	3	0	0	0	0	0	0	4.7	4.7	0	40.265	360	360;563;573	7.77							6	15	1		4	2	3
B1AUU8;P42566;H7BYP0;P42566-2;S4R3U1	B1AUU8;P42566	7;7;3;3;1	7;7;3;3;1	7;7;3;3;1	Epidermal growth factor receptor substrate 15	EPS15	>tr|B1AUU8|B1AUU8_HUMAN Epidermal growth factor receptor substrate 15 OS=Homo sapiens GN=EPS15 PE=1 SV=1;>sp|P42566|EPS15_HUMAN Epidermal growth factor receptor substrate 15 OS=Homo sapiens GN=EPS15 PE=1 SV=2	5	7	7	7	7	6	7	7	4	6	7	6	7	7	4	6	7	6	7	7	4	6	10.2	10.2	10.2	83.653	762	762;896;573;582;90	5.31			11	12		6	14	5			9	7	10
P07602;P07602-2;C9JIZ6;P07602-3;B1AVU8	P07602;P07602-2;C9JIZ6;P07602-3;B1AVU8	15;15;15;15;15	15;15;15;15;15	15;15;15;15;15	Proactivator polypeptide;Saposin-A;Saposin-B-Val;Saposin-B;Saposin-C;Saposin-D	PSAP	>sp|P07602|SAP_HUMAN Prosaposin OS=Homo sapiens GN=PSAP PE=1 SV=2;>sp|P07602-2|SAP_HUMAN Isoform Sap-mu-6 of Prosaposin OS=Homo sapiens GN=PSAP;>tr|C9JIZ6|C9JIZ6_HUMAN Prosaposin OS=Homo sapiens GN=PSAP PE=1 SV=1;>sp|P07602-3|SAP_HUMAN Isoform Sap-mu-9 of	5	15	15	15	13	13	11	13	15	14	13	13	11	13	15	14	13	13	11	13	15	14	28.6	28.6	28.6	58.112	524	524;526;526;527;559	4.95	5	39	16	16	10	8	10	18	24		23	26	18
B2WTI3;B2WTI4;Q6NYC1-2;K7EJU9;Q6NYC1;Q6NYC1-3	B2WTI3;B2WTI4;Q6NYC1-2;K7EJU9;Q6NYC1;Q6NYC1-3	7;7;7;7;7;7	7;7;7;7;7;7	7;7;7;7;7;7	Bifunctional arginine demethylase and lysyl-hydroxylase JMJD6	JMJD6	>tr|B2WTI3|B2WTI3_HUMAN Bifunctional arginine demethylase and lysyl-hydroxylase JMJD6 OS=Homo sapiens GN=JMJD6 PE=1 SV=1;>tr|B2WTI4|B2WTI4_HUMAN Bifunctional arginine demethylase and lysyl-hydroxylase JMJD6 OS=Homo sapiens GN=JMJD6 PE=1 SV=1;>sp|Q6NYC1-2|J	6	7	7	7	6	6	5	5	7	6	6	6	5	5	7	6	6	6	5	5	7	6	28.4	28.4	28.4	39.241	335	335;361;372;395;403;414	5.7		19		1	2	5	2		8	10	9	8	6
B3KMK8;O95210	B3KMK8;O95210	1;1	1;1	1;1	Starch-binding domain-containing protein 1	STBD1	>tr|B3KMK8|B3KMK8_HUMAN Protein FAM47E-STBD1 OS=Homo sapiens GN=FAM47E-STBD1 PE=2 SV=1;>sp|O95210|STBD1_HUMAN Starch-binding domain-containing protein 1 OS=Homo sapiens GN=STBD1 PE=1 SV=1	2	1	1	1	1	1	1	1	1	1	1	1	1	1	1	1	1	1	1	1	1	1	6.7	6.7	6.7	23.594	209	209;358	6.4						6	4				1	2	2
Q8IXK0-2;B3KPJ4;Q8IXK0-4;Q8IXK0;Q8IXK0-5;H7C528;Q8IXK0-3;C9J3D2;Q8NDX5-2;Q8NDX5;Q8NDX5-7	Q8IXK0-2;B3KPJ4;Q8IXK0-4;Q8IXK0;Q8IXK0-5;H7C528;Q8IXK0-3;C9J3D2;Q8NDX5-2;Q8NDX5;Q8NDX5-7	2;2;2;2;2;1;1;1;1;1;1	2;2;2;2;2;1;1;1;1;1;1	2;2;2;2;2;1;1;1;1;1;1	Polyhomeotic-like protein 2;Polyhomeotic-like protein 3	PHC2;PHC3	>sp|Q8IXK0-2|PHC2_HUMAN Isoform 2 of Polyhomeotic-like protein 2 OS=Homo sapiens GN=PHC2;>tr|B3KPJ4|B3KPJ4_HUMAN Polyhomeotic-like protein 2 OS=Homo sapiens GN=PHC2 PE=1 SV=1;>sp|Q8IXK0-4|PHC2_HUMAN Isoform 4 of Polyhomeotic-like protein 2 OS=Homo sapiens	11	2	2	2	2	2	2	1	2	2	2	2	2	1	2	2	2	2	2	1	2	2	7.4	7.4	7.4	35.759	323	323;464;829;858;859;161;267;317;964;983;995	4.65				8	7	2					3	4	2
Q99808;B3KQV7	Q99808;B3KQV7	4;4	4;4	4;4	Equilibrative nucleoside transporter 1	SLC29A1	>sp|Q99808|S29A1_HUMAN Equilibrative nucleoside transporter 1 OS=Homo sapiens GN=SLC29A1 PE=1 SV=3;>tr|B3KQV7|B3KQV7_HUMAN Equilibrative nucleoside transporter 1 OS=Homo sapiens GN=SLC29A1 PE=1 SV=1	2	4	4	4	4	4	3	2	4	3	4	4	3	2	4	3	4	4	3	2	4	3	11	11	11	50.219	456	456;535	5.95	5	5								11	4	4	3
B3KR41;Q9Y6D9;C9JP81;C9JTA2;C9K086;C9JKI7;C9JPS1	B3KR41;Q9Y6D9;C9JP81	7;7;4;2;2;1;1	7;7;4;2;2;1;1	7;7;4;2;2;1;1	Mitotic spindle assembly checkpoint protein MAD1	MAD1L1	>tr|B3KR41|B3KR41_HUMAN Mitotic spindle assembly checkpoint protein MAD1 OS=Homo sapiens GN=MAD1L1 PE=1 SV=1;>sp|Q9Y6D9|MD1L1_HUMAN Mitotic spindle assembly checkpoint protein MAD1 OS=Homo sapiens GN=MAD1L1 PE=1 SV=2;>tr|C9JP81|C9JP81_HUMAN Mitotic spindle	7	7	7	7	5	6	6	7	6	6	5	6	6	7	6	6	5	6	6	7	6	6	15.3	15.3	15.3	72.286	626	626;718;266;205;213;122;199	5.75	5	6		4	1	8	8	4	1	7	6	8	9
F5H5N1;B3KRI2;O75251;F5GXJ1	F5H5N1;B3KRI2;O75251;F5GXJ1	2;2;2;2	2;2;2;2	2;2;2;2	NADH dehydrogenase [ubiquinone] iron-sulfur protein 7, mitochondrial	NDUFS7	>tr|F5H5N1|F5H5N1_HUMAN NADH dehydrogenase [ubiquinone] iron-sulfur protein 7, mitochondrial OS=Homo sapiens GN=NDUFS7 PE=1 SV=1;>tr|B3KRI2|B3KRI2_HUMAN NADH dehydrogenase [ubiquinone] iron-sulfur protein 7, mitochondrial OS=Homo sapiens GN=NDUFS7 PE=1 SV=	4	2	2	2	1	1	2	1	1	1	1	1	2	1	1	1	1	1	2	1	1	1	12.6	12.6	12.6	19.77	182	182;206;213;236	4.75	1			1	8	2					1	1	4
O15372;B3KS98;E5RJT0;E5RGU4;E5RFW7;E5RFH0	O15372;B3KS98;E5RJT0	11;11;7;3;1;1	11;11;7;3;1;1	11;11;7;3;1;1	Eukaryotic translation initiation factor 3 subunit H	EIF3H	>sp|O15372|EIF3H_HUMAN Eukaryotic translation initiation factor 3 subunit H OS=Homo sapiens GN=EIF3H PE=1 SV=1;>tr|B3KS98|B3KS98_HUMAN Eukaryotic translation initiation factor 3 subunit H OS=Homo sapiens GN=EIF3H PE=1 SV=1;>tr|E5RJT0|E5RJT0_HUMAN Eukaryoti	6	11	11	11	10	11	9	10	10	10	10	11	9	10	10	10	10	11	9	10	10	10	33.5	33.5	33.5	39.93	352	352;366;244;235;97;170	6.73		12	6	5	6	21	55	23	17	11	26	28	23
O00303;B3KSH1;B4DEW9;H0YDT6;E9PQV8	O00303;B3KSH1;B4DEW9	12;12;10;3;1	12;12;10;3;1	12;12;10;3;1	Eukaryotic translation initiation factor 3 subunit F	EIF3F	>sp|O00303|EIF3F_HUMAN Eukaryotic translation initiation factor 3 subunit F OS=Homo sapiens GN=EIF3F PE=1 SV=1;>tr|B3KSH1|B3KSH1_HUMAN Eukaryotic translation initiation factor 3 subunit F OS=Homo sapiens GN=EIF3F PE=1 SV=1;>tr|B4DEW9|B4DEW9_HUMAN Eukaryoti	5	12	12	12	12	12	10	10	10	11	12	12	10	10	10	11	12	12	10	10	10	11	46.8	46.8	46.8	37.563	357	357;372;208;100;124	7.53		14	11	7	3	3	24	32	40	42	35	34	25
H0YNF6;B3KT51;E7EPS7;H0YNS4;Q9BRN9-2;Q9BRN9	H0YNF6;B3KT51;E7EPS7;H0YNS4;Q9BRN9-2;Q9BRN9	1;1;1;1;1;1	1;1;1;1;1;1	1;1;1;1;1;1	TM2 domain-containing protein 3	TM2D3	>tr|H0YNF6|H0YNF6_HUMAN TM2 domain-containing protein 3 (Fragment) OS=Homo sapiens GN=TM2D3 PE=4 SV=1;>tr|B3KT51|B3KT51_HUMAN TM2 domain containing 3, isoform CRA_a OS=Homo sapiens GN=TM2D3 PE=2 SV=1;>tr|E7EPS7|E7EPS7_HUMAN TM2 domain-containing protein 3	6	1	1	1	1	1	0	0	1	1	1	1	0	0	1	1	1	1	0	0	1	1	12.4	12.4	12.4	18.074	161	161;182;183;209;221;247	6						4					1	1
H7C1A6;C9JLX3;B3KT86;U3KQ91;O60266	H7C1A6;C9JLX3;B3KT86;U3KQ91;O60266	1;1;1;1;1	1;1;1;1;1	1;1;1;1;1	Adenylate cyclase type 3	ADCY3	>tr|H7C1A6|H7C1A6_HUMAN Adenylate cyclase type 3 (Fragment) OS=Homo sapiens GN=ADCY3 PE=3 SV=1;>tr|C9JLX3|C9JLX3_HUMAN Adenylate cyclase type 3 (Fragment) OS=Homo sapiens GN=ADCY3 PE=3 SV=1;>tr|B3KT86|B3KT86_HUMAN Adenylate cyclase type 3 OS=Homo sapiens G	5	1	1	1	1	1	1	1	1	1	1	1	1	1	1	1	1	1	1	1	1	1	5.4	5.4	5.4	32.966	298	298;482;731;791;1144	9.25									6	2	1	1	1
P49959-2;F8W7U8;P49959;B3KTC7;F5GXT0;F5H742;F5H256	P49959-2;F8W7U8;P49959;B3KTC7	17;17;17;17;6;4;4	17;17;17;17;6;4;4	17;17;17;17;6;4;4	Double-strand break repair protein MRE11A	MRE11A	>sp|P49959-2|MRE11_HUMAN Isoform 2 of Double-strand break repair protein MRE11A OS=Homo sapiens GN=MRE11A;>tr|F8W7U8|F8W7U8_HUMAN Double-strand break repair protein MRE11A OS=Homo sapiens GN=MRE11A PE=1 SV=1;>sp|P49959|MRE11_HUMAN Double-strand break repai	7	17	17	17	17	17	12	15	14	15	17	17	12	15	14	15	17	17	12	15	14	15	32.4	32.4	32.4	77.641	680	680;707;708;711;221;111;127	5.75	9		16	29	22	30	49	26	8		35	36	26
H0YMJ0;H0YLJ3;Q9UBU8-2;B3KTM8;Q9UBU8;H0YNE0	H0YMJ0;H0YLJ3;Q9UBU8-2;B3KTM8;Q9UBU8;H0YNE0	5;5;5;5;5;3	5;5;5;5;5;3	2;2;2;2;2;1	Mortality factor 4-like protein 1	MORF4L1	>tr|H0YMJ0|H0YMJ0_HUMAN Mortality factor 4-like protein 1 (Fragment) OS=Homo sapiens GN=MORF4L1 PE=1 SV=1;>tr|H0YLJ3|H0YLJ3_HUMAN Mortality factor 4-like protein 1 OS=Homo sapiens GN=MORF4L1 PE=1 SV=1;>sp|Q9UBU8-2|MO4L1_HUMAN Isoform 2 of Mortality factor	6	5	5	2	5	5	3	4	5	4	5	5	3	4	5	4	2	2	1	2	2	1	24.1	24.1	8.6	28.207	245	245;269;323;348;362;213	5.57	1	10	6				2	9	9		8	7	3
F5H3L3;F5H8D3;B3KUS5;Q70CQ3	F5H3L3;F5H8D3;B3KUS5;Q70CQ3	1;1;1;1	1;1;1;1	1;1;1;1	Ubiquitin carboxyl-terminal hydrolase;Ubiquitin carboxyl-terminal hydrolase 30	USP30	>tr|F5H3L3|F5H3L3_HUMAN Ubiquitin carboxyl-terminal hydrolase 30 (Fragment) OS=Homo sapiens GN=USP30 PE=4 SV=1;>tr|F5H8D3|F5H8D3_HUMAN Ubiquitin carboxyl-terminal hydrolase 30 (Fragment) OS=Homo sapiens GN=USP30 PE=4 SV=1;>tr|B3KUS5|B3KUS5_HUMAN Ubiquitin	4	1	1	1	0	0	0	1	0	0	0	0	0	1	0	0	0	0	0	1	0	0	13	13	13	16.621	146	146;177;486;517	5					1
J3QQS6;J3KRZ9;B3KUS7;Q9H3Q1;J3QR93	J3QQS6;J3KRZ9;B3KUS7;Q9H3Q1;J3QR93	3;3;3;3;2	3;3;3;3;2	3;3;3;3;2	Cdc42 effector protein 4	CDC42EP4	>tr|J3QQS6|J3QQS6_HUMAN Cdc42 effector protein 4 (Fragment) OS=Homo sapiens GN=CDC42EP4 PE=1 SV=1;>tr|J3KRZ9|J3KRZ9_HUMAN Cdc42 effector protein 4 (Fragment) OS=Homo sapiens GN=CDC42EP4 PE=1 SV=1;>tr|B3KUS7|B3KUS7_HUMAN Cdc42 effector protein 4 OS=Homo sap	5	3	3	3	2	3	2	3	3	3	2	3	2	3	3	3	2	3	2	3	3	3	54.8	54.8	54.8	7.8025	73	73;127;286;356;79	3.47		1	10	6	2						2	4	3
B3KVH1;O95785-3;M0QXA7;O95785;O95785-2	B3KVH1;O95785-3;M0QXA7;O95785;O95785-2	9;9;9;9;7	9;9;9;9;7	9;9;9;9;7	Protein Wiz	WIZ	>tr|B3KVH1|B3KVH1_HUMAN Protein Wiz OS=Homo sapiens GN=WIZ PE=1 SV=1;>sp|O95785-3|WIZ_HUMAN Isoform 3 of Protein Wiz OS=Homo sapiens GN=WIZ;>tr|M0QXA7|M0QXA7_HUMAN Protein Wiz OS=Homo sapiens GN=WIZ PE=1 SV=1;>sp|O95785|WIZ_HUMAN Protein Wiz OS=Homo sapien	5	9	9	9	5	6	8	7	8	6	5	6	8	7	8	6	5	6	8	7	8	6	11.5	11.5	11.5	89.355	835	835;965;968;1651;794	6.03		4	3	4	12	11	17	6	6		7	8	12
J3QLE5;P14678-2;P63162;P14678;B3KVR1;P14678-3;J3KRY3;S4R3P3	J3QLE5;P14678-2;P63162;P14678;B3KVR1;P14678-3;J3KRY3;S4R3P3	8;8;8;8;8;8;5;5	8;8;8;8;8;8;5;5	8;8;8;8;8;8;5;5	Small nuclear ribonucleoprotein-associated protein N;Small nuclear ribonucleoprotein-associated proteins B and B;Small nuclear ribonucleoprotein-associated protein	SNRPN;SNRPB	>tr|J3QLE5|J3QLE5_HUMAN Small nuclear ribonucleoprotein-associated protein N (Fragment) OS=Homo sapiens GN=SNRPN PE=4 SV=1;>sp|P14678-2|RSMB_HUMAN Isoform SM-B of Small nuclear ribonucleoprotein-associated proteins B and B OS=Homo sapiens GN=SNRPB;>sp|P63	8	8	8	8	8	8	8	8	8	8	8	8	8	8	8	8	8	8	8	8	8	8	35.5	35.5	35.5	17.546	169	169;231;240;240;244;289;59;70	4.46		32	21	28	17				3	18	19	19	20
B3KWN8;Q8WU10;H0YGU0;B4DEW4	B3KWN8;Q8WU10	3;3;1;1	3;3;1;1	3;3;1;1	Pyridine nucleotide-disulfide oxidoreductase domain-containing protein 1	PYROXD1	>tr|B3KWN8|B3KWN8_HUMAN Pyridine nucleotide-disulfide oxidoreductase domain-containing protein 1 OS=Homo sapiens GN=PYROXD1 PE=2 SV=1;>sp|Q8WU10|PYRD1_HUMAN Pyridine nucleotide-disulfide oxidoreductase domain-containing protein 1 OS=Homo sapiens GN=PYROXD1	4	3	3	3	3	3	2	2	2	2	3	3	2	2	2	2	3	3	2	2	2	2	11.7	11.7	11.7	48.338	429	429;500;60;139	7.47			2				1	12	2		5	3	3
B3KXE0;P32780	B3KXE0;P32780	1;1	1;1	1;1	General transcription factor IIH subunit 1	GTF2H1	>tr|B3KXE0|B3KXE0_HUMAN General transcription factor IIH subunit 1 OS=Homo sapiens GN=GTF2H1 PE=1 SV=1;>sp|P32780|TF2H1_HUMAN General transcription factor IIH subunit 1 OS=Homo sapiens GN=GTF2H1 PE=1 SV=1	2	1	1	1	0	0	1	1	1	0	0	0	1	1	1	0	0	0	1	1	1	0	3	3	3	48.738	432	432;548	6.33						2	1						1
O43747;O43747-2;J3KQU9;B3KXW5;H3BNR4;H3BR36;H3BUN9;H3BRM7;H3BN71;B4DGE1;B3KNW1;H3BNN2	O43747;O43747-2;J3KQU9;B3KXW5	24;24;24;24;6;4;4;2;2;2;2;1	24;24;24;24;6;4;4;2;2;2;2;1	24;24;24;24;6;4;4;2;2;2;2;1	AP-1 complex subunit gamma-1	AP1G1	>sp|O43747|AP1G1_HUMAN AP-1 complex subunit gamma-1 OS=Homo sapiens GN=AP1G1 PE=1 SV=5;>sp|O43747-2|AP1G1_HUMAN Isoform 2 of AP-1 complex subunit gamma-1 OS=Homo sapiens GN=AP1G1;>tr|J3KQU9|J3KQU9_HUMAN AP-1 complex subunit gamma-1 OS=Homo sapiens GN=AP1G1	12	24	24	24	23	24	22	22	21	22	23	24	22	22	21	22	23	24	22	22	21	22	37	37	37	91.35	822	822;825;825;845;236;187;208;139;144;176;247;58	6.29	12	14	17	22	55	76	54	30	44	31	61	63	60
B3KY83;P19793;P48443	B3KY83;P19793;P48443	6;6;3	2;2;0	2;2;0	Retinoic acid receptor RXR-alpha;Retinoic acid receptor RXR-gamma	RXRA;RXRG	>tr|B3KY83|B3KY83_HUMAN Retinoic acid receptor RXR-alpha OS=Homo sapiens GN=RXRA PE=2 SV=1;>sp|P19793|RXRA_HUMAN Retinoic acid receptor RXR-alpha OS=Homo sapiens GN=RXRA PE=1 SV=1;>sp|P48443|RXRG_HUMAN Retinoic acid receptor RXR-gamma OS=Homo sapiens GN=RX	3	6	2	2	4	6	5	5	4	5	2	2	2	2	1	2	2	2	2	2	1	2	18.4	7.4	7.4	41.06	365	365;462;463	7.31						1	7	5			2	3	2
O14735-3;O14735;B3KY94;H3BUR9;O14735-2	O14735-3;O14735;B3KY94;H3BUR9	3;3;3;2;1	3;3;3;2;1	3;3;3;2;1	CDP-diacylglycerol--inositol 3-phosphatidyltransferase	CDIPT	>sp|O14735-3|CDIPT_HUMAN Isoform 3 of CDP-diacylglycerol--inositol 3-phosphatidyltransferase OS=Homo sapiens GN=CDIPT;>sp|O14735|CDIPT_HUMAN CDP-diacylglycerol--inositol 3-phosphatidyltransferase OS=Homo sapiens GN=CDIPT PE=1 SV=1;>tr|B3KY94|B3KY94_HUMAN C	5	3	3	3	3	2	2	3	2	2	3	2	2	3	2	2	3	2	2	3	2	2	20.8	20.8	20.8	18.624	168	168;213;237;157;182	8.81							2	9	1	9	4	3	3
B4DDF4;Q99439;B4DUT8;Q99439-2;H3BVI6;K7ES69;H3BQH0;U3KPS3	B4DDF4;Q99439;B4DUT8;Q99439-2;H3BVI6;K7ES69	10;10;10;8;7;5;4;2	9;9;9;7;7;4;4;2	9;9;9;7;7;4;4;2	Calponin-2	CNN2	>tr|B4DDF4|B4DDF4_HUMAN Calponin-2 OS=Homo sapiens GN=CNN2 PE=1 SV=1;>sp|Q99439|CNN2_HUMAN Calponin-2 OS=Homo sapiens GN=CNN2 PE=1 SV=4;>tr|B4DUT8|B4DUT8_HUMAN Calponin-2 OS=Homo sapiens GN=CNN2 PE=1 SV=1;>sp|Q99439-2|CNN2_HUMAN Isoform 2 of Calponin-2 OS=	8	10	9	9	9	9	9	9	10	9	8	8	9	9	9	8	8	8	9	9	9	8	45	41.3	41.3	32.616	298	298;309;330;270;218;148;154;103	6.22		13	22	12	4	9	24	43	23		23	26	28
B4DDF9	B4DDF9	12	1	1	Annexin	ANXA4	>tr|B4DDF9|B4DDF9_HUMAN Annexin OS=Homo sapiens GN=ANXA4 PE=1 SV=1	1	12	1	1	12	12	12	12	12	12	1	1	1	1	1	1	1	1	1	1	1	1	52.7	5.5	5.5	27.062	237	237	4.45				23	19						7	10	5
F5H6T0;B4DDH7;Q8TB40;F5GZC9;H0YFD5;F5H067	F5H6T0;B4DDH7;Q8TB40;F5GZC9;H0YFD5;F5H067	2;2;2;1;1;1	2;2;2;1;1;1	2;2;2;1;1;1	Abhydrolase domain-containing protein 4	ABHD4	>tr|F5H6T0|F5H6T0_HUMAN Abhydrolase domain-containing protein 4 (Fragment) OS=Homo sapiens GN=ABHD4 PE=4 SV=1;>tr|B4DDH7|B4DDH7_HUMAN Abhydrolase domain-containing protein 4 OS=Homo sapiens GN=ABHD4 PE=2 SV=1;>sp|Q8TB40|ABHD4_HUMAN Abhydrolase domain-conta	6	2	2	2	2	2	2	2	2	1	2	2	2	2	2	1	2	2	2	2	2	1	22.2	22.2	22.2	10.143	90	90;181;342;44;54;85	9.06								3	11	4	4	4	3
C9IZT1;C9JVE9;B4DDS0;Q9H0V1	C9IZT1;C9JVE9;B4DDS0;Q9H0V1	1;1;1;1	1;1;1;1	1;1;1;1	Transmembrane protein 168	TMEM168;FLJ13576	>tr|C9IZT1|C9IZT1_HUMAN Transmembrane protein 168 (Fragment) OS=Homo sapiens GN=TMEM168 PE=4 SV=1;>tr|C9JVE9|C9JVE9_HUMAN Transmembrane protein 168 (Fragment) OS=Homo sapiens GN=TMEM168 PE=4 SV=1;>tr|B4DDS0|B4DDS0_HUMAN Transmembrane protein 168 OS=Homo sa	4	1	1	1	0	1	1	1	1	1	0	1	1	1	1	1	0	1	1	1	1	1	8.9	8.9	8.9	12.364	112	112;124;313;697	6						5						1	1
B4DDT2;O75191	B4DDT2;O75191	6;6	6;6	6;6	Xylulose kinase	XYLB	>tr|B4DDT2|B4DDT2_HUMAN Xylulose kinase OS=Homo sapiens GN=XYLB PE=1 SV=1;>sp|O75191|XYLB_HUMAN Xylulose kinase OS=Homo sapiens GN=XYLB PE=1 SV=3	2	6	6	6	6	5	5	5	4	4	6	5	5	5	4	4	6	5	5	5	4	4	18	18	18	43.181	399	399;536	5.78			13	5	3	12	14	11	1		9	11	10
O43414-3;B4DEX5;H0Y4B0;O43414-2;O43414	O43414-3;B4DEX5;H0Y4B0;O43414-2;O43414	1;1;1;1;1	1;1;1;1;1	1;1;1;1;1	ERI1 exoribonuclease 3	PRNPIP;ERI3	>sp|O43414-3|ERI3_HUMAN Isoform 3 of ERI1 exoribonuclease 3 OS=Homo sapiens GN=ERI3;>tr|B4DEX5|B4DEX5_HUMAN ERI1 exoribonuclease 3 OS=Homo sapiens GN=ERI3 PE=1 SV=1;>tr|H0Y4B0|H0Y4B0_HUMAN ERI1 exoribonuclease 3 (Fragment) OS=Homo sapiens GN=ERI3 PE=1 SV=1	5	1	1	1	1	1	1	1	1	1	1	1	1	1	1	1	1	1	1	1	1	1	7	7	7	14.542	128	128;160;204;222;337	7.6							4	6			2	2	2
B4DF47;Q9BUK6-7;Q9BUK6-3;Q9BUK6-2;Q9BUK6;Q9BUK6-5;Q9BUK6-4;B4DHK3	B4DF47;Q9BUK6-7;Q9BUK6-3;Q9BUK6-2;Q9BUK6	5;5;5;5;5;2;1;1	5;5;5;5;5;2;1;1	5;5;5;5;5;2;1;1	Protein misato homolog 1	MSTO1	>tr|B4DF47|B4DF47_HUMAN Protein misato homolog 1 OS=Homo sapiens GN=MSTO1 PE=1 SV=1;>sp|Q9BUK6-7|MSTO1_HUMAN Isoform 7 of Protein misato homolog 1 OS=Homo sapiens GN=MSTO1;>sp|Q9BUK6-3|MSTO1_HUMAN Isoform 3 of Protein misato homolog 1 OS=Homo sapiens GN=MS	8	5	5	5	4	4	5	4	5	5	4	4	5	4	5	5	4	4	5	4	5	5	17.1	17.1	17.1	34.737	315	315;524;558;569;570;391;99;147	4.86		8	4	4	1	9	8	2			5	5	8
B4DF64;Q68CZ6	B4DF64;Q68CZ6	4;4	4;4	4;4	HAUS augmin-like complex subunit 3	HAUS3	>tr|B4DF64|B4DF64_HUMAN HAUS augmin-like complex subunit 3 OS=Homo sapiens GN=HAUS3 PE=1 SV=1;>sp|Q68CZ6|HAUS3_HUMAN HAUS augmin-like complex subunit 3 OS=Homo sapiens GN=HAUS3 PE=1 SV=1	2	4	4	4	1	2	3	1	3	2	1	2	3	1	3	2	1	2	3	1	3	2	8.2	8.2	8.2	56.384	489	489;603	5.83		1		1	1	4	5				1	2	3
Q9P0J0;B4DF76;J3KN00;U3KQP3;B4DEZ3;K7EJE1	Q9P0J0;B4DF76;J3KN00;U3KQP3;B4DEZ3;K7EJE1	5;5;5;3;3;3	5;5;5;3;3;3	2;2;2;0;0;0	NADH dehydrogenase [ubiquinone] 1 alpha subcomplex subunit 13	NDUFA13	>sp|Q9P0J0|NDUAD_HUMAN NADH dehydrogenase [ubiquinone] 1 alpha subcomplex subunit 13 OS=Homo sapiens GN=NDUFA13 PE=1 SV=3;>tr|B4DF76|B4DF76_HUMAN NADH dehydrogenase [ubiquinone] 1 alpha subcomplex subunit 13 OS=Homo sapiens GN=NDUFA13 PE=1 SV=1;>tr|J3KN00|	6	5	5	2	4	5	4	4	4	4	4	5	4	4	4	4	1	2	1	1	1	1	31.9	31.9	16	16.698	144	144;222;227;75;120;150	5.26	1	6	14	7					7	8	6	10	6
Q9UBD8;Q13286-5;Q13286-4;H3BPM8;Q2TA70;B4DFF3;Q13286-2;B4DXL3;Q13286-3;Q13286	Q9UBD8;Q13286-5;Q13286-4;H3BPM8;Q2TA70;B4DFF3;Q13286-2;B4DXL3;Q13286-3;Q13286	1;1;1;1;1;1;1;1;1;1	1;1;1;1;1;1;1;1;1;1	1;1;1;1;1;1;1;1;1;1	Battenin	CLN3	>tr|Q9UBD8|Q9UBD8_HUMAN Battenin OS=Homo sapiens GN=CLN3 PE=1 SV=1;>sp|Q13286-5|CLN3_HUMAN Isoform 5 of Battenin OS=Homo sapiens GN=CLN3;>sp|Q13286-4|CLN3_HUMAN Isoform 4 of Battenin OS=Homo sapiens GN=CLN3;>tr|H3BPM8|H3BPM8_HUMAN Battenin OS=Homo sapiens	10	1	1	1	1	1	1	1	1	0	1	1	1	1	1	0	1	1	1	1	1	0	8.3	8.3	8.3	19.287	181	181;253;321;341;360;384;390;414;421;438	10										6	1	2	1
B4DFL2;P48735;B4DSZ6;H0YL11	B4DFL2;P48735;B4DSZ6	13;13;10;6	12;12;9;6	12;12;9;6	Isocitrate dehydrogenase [NADP];Isocitrate dehydrogenase [NADP], mitochondrial	IDH2	>tr|B4DFL2|B4DFL2_HUMAN Isocitrate dehydrogenase [NADP] OS=Homo sapiens GN=IDH2 PE=1 SV=1;>sp|P48735|IDHP_HUMAN Isocitrate dehydrogenase [NADP], mitochondrial OS=Homo sapiens GN=IDH2 PE=1 SV=2;>tr|B4DSZ6|B4DSZ6_HUMAN Isocitrate dehydrogenase [NADP], mitoch	4	13	12	12	12	12	12	13	12	13	11	11	11	12	11	12	11	11	11	12	11	12	33.8	31.5	31.5	45.179	400	400;452;322;312	6.2	14	15	6	1	12	9	12	29	17	17	26	24	20
B4DFQ4;Q8N668;H7C169;E9PE85	B4DFQ4;Q8N668	4;4;1;1	4;4;1;1	4;4;1;1	COMM domain-containing protein 1	COMMD1	>tr|B4DFQ4|B4DFQ4_HUMAN COMM domain-containing protein 1 OS=Homo sapiens GN=COMMD1 PE=1 SV=1;>sp|Q8N668|COMD1_HUMAN COMM domain-containing protein 1 OS=Homo sapiens GN=COMMD1 PE=1 SV=1	4	4	4	4	4	4	2	3	2	3	4	4	2	3	2	3	4	4	2	3	2	3	44.7	44.7	44.7	17.665	159	159;190;50;98	5.5		6		1	2	4	6	5			5	4	2
B4DHT5;Q96CM8;B4DFQ6;E9PF16;B4DUF5;D6RF87;H0Y8N1	B4DHT5;Q96CM8;B4DFQ6;E9PF16;B4DUF5	18;18;18;16;12;6;1	18;18;18;16;12;6;1	18;18;18;16;12;6;1	Acyl-CoA synthetase family member 2, mitochondrial	ACSF2	>tr|B4DHT5|B4DHT5_HUMAN Acyl-CoA synthetase family member 2, mitochondrial OS=Homo sapiens GN=ACSF2 PE=2 SV=1;>sp|Q96CM8|ACSF2_HUMAN Acyl-CoA synthetase family member 2, mitochondrial OS=Homo sapiens GN=ACSF2 PE=1 SV=2;>tr|B4DFQ6|B4DFQ6_HUMAN Acyl-CoA synt	7	18	18	18	17	17	16	17	17	17	17	17	16	17	17	17	17	17	16	17	17	17	40	40	40	66.798	602	602;615;640;572;455;183;104	4.75	10	54	46	29	21	13	15	17	26	13	43	40	38
Q9NP97;B4DFR2;B1AKR6;Q8TF09;H3BNG9;H3BPA0;Q9NP97-2;Q7Z4M1;H3BQI1	Q9NP97;B4DFR2;B1AKR6;Q8TF09	4;4;3;2;1;1;1;1;1	4;4;3;2;1;1;1;1;1	4;4;3;2;1;1;1;1;1	Dynein light chain roadblock-type 1;Dynein light chain roadblock-type 2	DYNLRB1;DYNLRB2	>sp|Q9NP97|DLRB1_HUMAN Dynein light chain roadblock-type 1 OS=Homo sapiens GN=DYNLRB1 PE=1 SV=3;>tr|B4DFR2|B4DFR2_HUMAN Dynein light chain roadblock-type 1 OS=Homo sapiens GN=DYNLRB1 PE=1 SV=1;>tr|B1AKR6|B1AKR6_HUMAN Dynein light chain roadblock-type 1 OS=	9	4	4	4	4	4	3	3	4	4	4	4	3	3	4	4	4	4	3	3	4	4	60.4	60.4	60.4	10.921	96	96;121;148;96;40;44;47;54;125	5.95	4	6	4				3	12	9		7	6	7
B4DGG1;Q9H0X4-2;Q9H0X4;C9JP72;H7C2U8;C9J3Y6;C9IYB9;C9K0C5;C9J1M4;C9J8V3;C9JJN3;C9JR71;C9JTF7;H7C3L6	B4DGG1;Q9H0X4-2;Q9H0X4	5;5;5;2;2;2;2;2;1;1;1;1;1;1	5;5;5;2;2;2;2;2;1;1;1;1;1;1	5;5;5;2;2;2;2;2;1;1;1;1;1;1	Protein ITFG3	ITFG3	>tr|B4DGG1|B4DGG1_HUMAN Protein ITFG3 OS=Homo sapiens GN=ITFG3 PE=1 SV=1;>sp|Q9H0X4-2|ITFG3_HUMAN Isoform 2 of Protein ITFG3 OS=Homo sapiens GN=ITFG3;>sp|Q9H0X4|ITFG3_HUMAN Protein ITFG3 OS=Homo sapiens GN=ITFG3 PE=1 SV=1	14	5	5	5	5	5	5	5	5	4	5	5	5	5	5	4	5	5	5	5	5	4	11.3	11.3	11.3	57.547	531	531;540;552;131;192;233;236;242;50;68;87;102;103;234	4.77	7	3	9	16	14			6	7	2	10	12	10
J3QKS7;Q969G3-2;B4DGM3;Q969G3;K7EMQ8;Q969G3-6;Q969G3-5;Q969G3-3;Q969G3-4;H7C048;J3KS99;J3QL66;J3QKX6;J3QR61	J3QKS7;Q969G3-2;B4DGM3;Q969G3;K7EMQ8;Q969G3-6;Q969G3-5;Q969G3-3;Q969G3-4;H7C048	6;6;6;6;5;5;5;5;5;4;1;1;1;1	6;6;6;6;5;5;5;5;5;4;1;1;1;1	6;6;6;6;5;5;5;5;5;4;1;1;1;1	SWI/SNF-related matrix-associated actin-dependent regulator of chromatin subfamily E member 1	SMARCE1	>tr|J3QKS7|J3QKS7_HUMAN SWI/SNF-related matrix-associated actin-dependent regulator of chromatin subfamily E member 1 (Fragment) OS=Homo sapiens GN=SMARCE1 PE=1 SV=1;>sp|Q969G3-2|SMCE1_HUMAN Isoform 2 of SWI/SNF-related matrix-associated actin-dependent re	14	6	6	6	5	6	6	4	6	4	5	6	6	4	6	4	5	6	6	4	6	4	25.7	25.7	25.7	33.433	288	288;363;393;411;177;293;328;341;376;157;55;77;129;153	4.26	6	8	6		3	11	6	2			6	7	9
P27824;B4DGP8;B4E2T8;H0Y9Q7;D6RGY2;D6RDP7;D6RFL1;D6RB85;H0Y9H1;D6RAU8;D6RAQ8;D6RHJ3;D6RD16	P27824;B4DGP8;B4E2T8;H0Y9Q7	19;19;16;10;9;8;7;7;6;5;2;1;1	19;19;16;10;9;8;7;7;6;5;2;1;1	19;19;16;10;9;8;7;7;6;5;2;1;1	Calnexin	CANX	>sp|P27824|CALX_HUMAN Calnexin OS=Homo sapiens GN=CANX PE=1 SV=2;>tr|B4DGP8|B4DGP8_HUMAN Calnexin OS=Homo sapiens GN=CANX PE=1 SV=1;>tr|B4E2T8|B4E2T8_HUMAN Calnexin OS=Homo sapiens GN=CANX PE=1 SV=1;>tr|H0Y9Q7|H0Y9Q7_HUMAN Calnexin (Fragment) OS=Homo sapie	13	19	19	19	18	18	16	17	18	18	18	18	16	17	18	18	18	18	16	17	18	18	32.6	32.6	32.6	67.567	592	592;627;484;170;308;168;131;144;189;134;107;78;96	5.78	11	43	39	38	37	28	11	42	53	32	58	57	45
B4DGU4;P35222;P35222-2;E7EMJ5;C9IZ65;E9PDF9;E7EV28	B4DGU4;P35222	19;19;3;2;1;1;1	14;14;1;2;1;1;1	14;14;1;2;1;1;1	Catenin beta-1	CTNNB1	>tr|B4DGU4|B4DGU4_HUMAN Catenin beta-1 OS=Homo sapiens GN=CTNNB1 PE=1 SV=1;>sp|P35222|CTNB1_HUMAN Catenin beta-1 OS=Homo sapiens GN=CTNNB1 PE=1 SV=1	7	19	14	14	17	18	17	17	15	16	12	13	13	12	10	11	12	13	13	12	10	11	31.7	24.5	24.5	84.765	774	774;781;88;149;59;100;108	6.4	5	16	7	12	15	26	36	32	25	12	38	31	33
B4DGZ4	B4DGZ4	3	1	1		SF3B1	>tr|B4DGZ4|B4DGZ4_HUMAN Splicing factor 3B subunit 1 OS=Homo sapiens GN=SF3B1 PE=1 SV=1	1	3	1	1	3	3	3	3	1	2	1	1	1	1	0	0	1	1	1	1	0	0	35.1	9.7	9.7	17.409	154	154	3.14		1	4	2							2	2	2
B4DH06;O43741	B4DH06;O43741	5;5	4;4	4;4	5-AMP-activated protein kinase subunit beta-2	PRKAB2	>tr|B4DH06|B4DH06_HUMAN 5-AMP-activated protein kinase subunit beta-2 OS=Homo sapiens GN=PRKAB2 PE=1 SV=1;>sp|O43741|AAKB2_HUMAN 5-AMP-activated protein kinase subunit beta-2 OS=Homo sapiens GN=PRKAB2 PE=1 SV=1	2	5	4	4	4	4	3	3	3	5	3	3	2	2	2	4	3	3	2	2	2	4	20.5	15.3	15.3	21.484	190	190;272	4.53	1	7	4							5	3	3	2
B4DH53;Q66K74;M0QXQ9;M0QY41;M0R1M7;M0R1J2;M0QZ50	B4DH53;Q66K74	13;13;3;3;2;2;1	13;13;3;3;2;2;1	13;13;3;3;2;2;1	Microtubule-associated protein 1S;MAP1S heavy chain;MAP1S light chain	MAP1S	>tr|B4DH53|B4DH53_HUMAN MAP1S light chain OS=Homo sapiens GN=MAP1S PE=1 SV=1;>sp|Q66K74|MAP1S_HUMAN Microtubule-associated protein 1S OS=Homo sapiens GN=MAP1S PE=1 SV=2	7	13	13	13	13	12	12	11	12	12	13	12	12	11	12	12	13	12	12	11	12	12	16.6	16.6	16.6	109.79	1033	1033;1059;185;189;120;188;93	5.57	6	15	11	13	14	9	15	22	17		25	19	22
Q9UKB1-2;B4DH70;Q9UKB1-3;Q9UKB1;E5RGC1	Q9UKB1-2;B4DH70;Q9UKB1-3;Q9UKB1	5;5;5;5;1	5;5;5;5;1	2;2;2;2;0	F-box/WD repeat-containing protein 11	FBXW11	>sp|Q9UKB1-2|FBW1B_HUMAN Isoform A of F-box/WD repeat-containing protein 11 OS=Homo sapiens GN=FBXW11;>tr|B4DH70|B4DH70_HUMAN F-box/WD repeat-containing protein 11 OS=Homo sapiens GN=FBXW11 PE=2 SV=1;>sp|Q9UKB1-3|FBW1B_HUMAN Isoform B of F-box/WD repeat-co	5	5	5	2	4	4	4	5	4	5	4	4	4	5	4	5	1	1	2	2	1	2	10	10	4.1	58.422	508	508;510;529;542;196	3.72		5	13	1	12	1					8	5	4
B4DHB2;Q9Y2G1-2;Q9Y2G1	B4DHB2;Q9Y2G1-2;Q9Y2G1	1;1;1	1;1;1	1;1;1	Myelin regulatory factor	MYRF	>tr|B4DHB2|B4DHB2_HUMAN Myelin regulatory factor OS=Homo sapiens GN=MYRF PE=2 SV=1;>sp|Q9Y2G1-2|MRF_HUMAN Isoform 2 of Myelin regulatory factor OS=Homo sapiens GN=MYRF;>sp|Q9Y2G1|MRF_HUMAN Myelin regulatory factor OS=Homo sapiens GN=MYRF PE=1 SV=3	3	1	1	1	1	1	1	1	1	1	1	1	1	1	1	1	1	1	1	1	1	1	1.9	1.9	1.9	57.48	537	537;1111;1151	6.6						4	6				1	1	1
B4DHE8;Q96DH6-2;Q96DH6;J3KTC1;Q96DH6-3;B4DM51;J3QKT5;H0YHB7;O43347	B4DHE8;Q96DH6-2;Q96DH6;J3KTC1;Q96DH6-3;B4DM51	9;8;8;5;5;5;3;2;2	9;8;8;5;5;5;3;2;2	9;8;8;5;5;5;3;2;2	RNA-binding protein Musashi homolog 2	MSI2	>tr|B4DHE8|B4DHE8_HUMAN RNA-binding protein Musashi homolog 2 OS=Homo sapiens GN=MSI2 PE=1 SV=1;>sp|Q96DH6-2|MSI2H_HUMAN Isoform 2 of RNA-binding protein Musashi homolog 2 OS=Homo sapiens GN=MSI2;>sp|Q96DH6|MSI2H_HUMAN RNA-binding protein Musashi homolog 2	9	9	9	9	9	9	9	8	8	9	9	9	9	8	8	9	9	9	9	8	8	9	32.1	32.1	32.1	34.812	324	324;251;328;140;151;267;99;233;362	4.33		42	18	4		7	13	2	4	9	17	16	16
B4DHR0;Q9H5N1-2;Q9H5N1;H3BNR8;H3BU67;H3BNR2;H3BT64	B4DHR0;Q9H5N1-2;Q9H5N1	4;4;4;1;1;1;1	4;4;4;1;1;1;1	4;4;4;1;1;1;1	Rab GTPase-binding effector protein 2	RABEP2	>tr|B4DHR0|B4DHR0_HUMAN Rab GTPase-binding effector protein 2 OS=Homo sapiens GN=RABEP2 PE=1 SV=1;>sp|Q9H5N1-2|RABE2_HUMAN Isoform 2 of Rab GTPase-binding effector protein 2 OS=Homo sapiens GN=RABEP2;>sp|Q9H5N1|RABE2_HUMAN Rab GTPase-binding effector prote	7	4	4	4	4	2	3	3	2	3	4	2	3	3	2	3	4	2	3	3	2	3	7.6	7.6	7.6	56.112	498	498;533;569;44;72;245;280	5.82	3				6	12	9	3			8	4	5
B4DI26;Q9Y6N1-2;Q9Y6N1	B4DI26;Q9Y6N1-2;Q9Y6N1	1;1;1	1;1;1	1;1;1	Cytochrome c oxidase assembly protein COX11, mitochondrial	COX11	>tr|B4DI26|B4DI26_HUMAN Cytochrome c oxidase assembly protein COX11, mitochondrial OS=Homo sapiens GN=COX11 PE=2 SV=1;>sp|Q9Y6N1-2|COX11_HUMAN Isoform 2 of Cytochrome c oxidase assembly protein COX11, mitochondrial OS=Homo sapiens GN=COX11;>sp|Q9Y6N1|COX11	3	1	1	1	1	1	1	1	1	1	1	1	1	1	1	1	1	1	1	1	1	1	8.7	8.7	8.7	25.977	230	230;231;276	3.83			1	5							1	1	1
E5RJ56;Q08495-3;B4DI75;Q08495-2;Q08495;E5RGQ7;E5RJC0;E5RFK4;E5RIG5;E5RGQ0	E5RJ56;Q08495-3;B4DI75;Q08495-2;Q08495;E5RGQ7;E5RJC0;E5RFK4;E5RIG5;E5RGQ0	2;2;2;2;2;1;1;1;1;1	2;2;2;2;2;1;1;1;1;1	2;2;2;2;2;1;1;1;1;1	Dematin	EPB49	>tr|E5RJ56|E5RJ56_HUMAN Dematin OS=Homo sapiens GN=DMTN PE=1 SV=1;>sp|Q08495-3|DEMA_HUMAN Isoform 3 of Dematin OS=Homo sapiens GN=DMTN;>tr|B4DI75|B4DI75_HUMAN Dematin OS=Homo sapiens GN=DMTN PE=1 SV=1;>sp|Q08495-2|DEMA_HUMAN Isoform 2 of Dematin OS=Homo sa	10	2	2	2	2	2	2	1	2	2	2	2	2	1	2	2	2	2	2	1	2	2	7.7	7.7	7.7	36.488	326	326;358;365;383;405;148;151;189;209;211	5.18				5	5	6	1				3	3	2
B4DIR9;Q9NYJ8	B4DIR9;Q9NYJ8	2;2	2;2	2;2	TGF-beta-activated kinase 1 and MAP3K7-binding protein 2	TAB2	>tr|B4DIR9|B4DIR9_HUMAN TGF-beta-activated kinase 1 and MAP3K7-binding protein 2 OS=Homo sapiens GN=TAB2 PE=1 SV=1;>sp|Q9NYJ8|TAB2_HUMAN TGF-beta-activated kinase 1 and MAP3K7-binding protein 2 OS=Homo sapiens GN=TAB2 PE=1 SV=1	2	2	2	2	1	2	2	2	2	2	1	2	2	2	2	2	1	2	2	2	2	2	4.5	4.5	4.5	72.804	661	661;693	6.75				2	3		9	5	1		3	4	3
B4DIT7;P21980;F5H6P0;P21980-2;A2A299;P21980-3;A2A2A0;O43548-2;O43548	B4DIT7;P21980;F5H6P0;P21980-2	16;16;15;8;3;3;1;1;1	16;16;15;8;3;3;1;1;1	16;16;15;8;3;3;1;1;1	Protein-glutamine gamma-glutamyltransferase 2	TGM2	>tr|B4DIT7|B4DIT7_HUMAN Protein-glutamine gamma-glutamyltransferase 2 OS=Homo sapiens GN=TGM2 PE=1 SV=1;>sp|P21980|TGM2_HUMAN Protein-glutamine gamma-glutamyltransferase 2 OS=Homo sapiens GN=TGM2 PE=1 SV=2;>tr|F5H6P0|F5H6P0_HUMAN Protein-glutamine gamma-gl	9	16	16	16	15	15	16	16	15	16	15	15	16	16	15	16	15	15	16	16	15	16	31.2	31.2	31.2	68.648	606	606;687;627;548;280;349;159;638;720	5.74	13	20	15	15	22	13	12	12	48	4	29	29	30
B4DJA5;P20339	B4DJA5;P20339	7;7	4;4	4;4	Ras-related protein Rab-5A	RAB5A	>tr|B4DJA5|B4DJA5_HUMAN Ras-related protein Rab-5A OS=Homo sapiens GN=RAB5A PE=1 SV=1;>sp|P20339|RAB5A_HUMAN Ras-related protein Rab-5A OS=Homo sapiens GN=RAB5A PE=1 SV=2	2	7	4	4	6	5	7	7	6	6	3	2	4	4	3	3	3	2	4	4	3	3	45.3	29.4	29.4	22.178	201	201;215	5.48	5	4	7						14	1	5	5	6
B4DVT3;Q96SY0;B4DJL6;Q96SY0-4;Q96SY0-3;H3BRY6;H3BP17;H3BMK7;H3BN95;Q96SY0-2	B4DVT3;Q96SY0;B4DJL6;Q96SY0-4;Q96SY0-3;H3BRY6	8;8;8;7;7;7;2;2;1;1	8;8;8;7;7;7;2;2;1;1	8;8;8;7;7;7;2;2;1;1	von Willebrand factor A domain-containing protein 9	VWA9	>tr|B4DVT3|B4DVT3_HUMAN cDNA FLJ50705 OS=Homo sapiens GN=VWA9 PE=1 SV=1;>sp|Q96SY0|VWA9_HUMAN von Willebrand factor A domain-containing protein 9 OS=Homo sapiens GN=VWA9 PE=1 SV=2;>tr|B4DJL6|B4DJL6_HUMAN cDNA FLJ55475 OS=Homo sapiens GN=VWA9 PE=1 SV=1;>sp|	10	8	8	8	6	5	5	7	5	5	6	5	5	7	5	5	6	5	5	7	5	5	20.1	20.1	20.1	53.587	482	482;518;554;439;461;468;154;169;71;86	5.28	5	10	4			4			1	12	7	5	5
I3L2V0;B4DJP2;H3BR29;H3BSM7;Q96GQ5	I3L2V0;B4DJP2;H3BR29;H3BSM7;Q96GQ5	2;2;2;2;2	2;2;2;2;2	2;2;2;2;2	UPF0420 protein C16orf58	C16orf58	>tr|I3L2V0|I3L2V0_HUMAN UPF0420 protein C16orf58 (Fragment) OS=Homo sapiens GN=C16orf58 PE=4 SV=1;>tr|B4DJP2|B4DJP2_HUMAN UPF0420 protein C16orf58 OS=Homo sapiens GN=C16orf58 PE=2 SV=1;>tr|H3BR29|H3BR29_HUMAN UPF0420 protein C16orf58 OS=Homo sapiens GN=C16	5	2	2	2	2	1	1	1	1	1	2	1	1	1	1	1	2	1	1	1	1	1	24.4	24.4	24.4	9.1358	82	82;194;423;466;468	3.89			2	6	1						2	2	2
B4DJP7;P62318;H3BT13	B4DJP7;P62318;H3BT13	4;4;2	4;4;2	4;4;2	Small nuclear ribonucleoprotein Sm D3	SNRPD3	>tr|B4DJP7|B4DJP7_HUMAN Small nuclear ribonucleoprotein Sm D3 OS=Homo sapiens GN=SNRPD3 PE=1 SV=1;>sp|P62318|SMD3_HUMAN Small nuclear ribonucleoprotein Sm D3 OS=Homo sapiens GN=SNRPD3 PE=1 SV=1;>tr|H3BT13|H3BT13_HUMAN Small nuclear ribonucleoprotein Sm D3	3	4	4	4	4	4	4	3	4	3	4	4	4	3	4	3	4	4	4	3	4	3	39.2	39.2	39.2	13.291	120	120;126;62	5.04		18		7	11	4			1	11	9	9	9
B4DJV2;O75390;H0YIC4;H0YH82;F8VRI6;F8VPF9;F8VPA1;F8VTT8;F8W1S4;F8W4S1;F8VRP1;F8VX68;F8VR34;F8W642;F8VZK9;F8VX07;F8VWQ5;F8VU34	B4DJV2;O75390	17;17;7;5;4;4;4;4;4;4;3;3;3;2;2;2;2;2	17;17;7;5;4;4;4;4;4;4;3;3;3;2;2;2;2;2	16;16;7;5;4;4;4;3;4;3;3;3;2;2;2;2;1;1	Citrate synthase;Citrate synthase, mitochondrial	CS	>tr|B4DJV2|B4DJV2_HUMAN Citrate synthase OS=Homo sapiens GN=CS PE=1 SV=1;>sp|O75390|CISY_HUMAN Citrate synthase, mitochondrial OS=Homo sapiens GN=CS PE=1 SV=2	18	17	17	16	17	17	15	15	15	16	17	17	15	15	15	16	16	16	14	14	14	15	48.1	48.1	46.1	50.431	453	453;466;123;190;140;140;144;149;157;178;117;120;146;66;80;114;132;142	6.06	1	36	40	16	9	19	35	53	38	18	46	48	41
B4DKL4;S4R3V8;Q86X29-5;Q86X29-3;Q86X29-4;Q86X29;Q86X29-2;M0QZL9;M0R1W9	B4DKL4;S4R3V8;Q86X29-5;Q86X29-3;Q86X29-4;Q86X29;Q86X29-2	8;8;8;8;8;8;7;1;1	8;8;8;8;8;8;7;1;1	8;8;8;8;8;8;7;1;1	Lipolysis-stimulated lipoprotein receptor	LSR	>tr|B4DKL4|B4DKL4_HUMAN Lipolysis-stimulated lipoprotein receptor OS=Homo sapiens GN=LSR PE=1 SV=1;>tr|S4R3V8|S4R3V8_HUMAN Lipolysis-stimulated lipoprotein receptor (Fragment) OS=Homo sapiens GN=LSR PE=1 SV=1;>sp|Q86X29-5|LSR_HUMAN Isoform 5 of Lipolysis-s	9	8	8	8	8	6	8	7	7	6	8	6	8	7	7	6	8	6	8	7	7	6	22.9	22.9	22.9	54.498	493	493;500;581;629;630;649;591;114;213	3.51	9	24	22	11		6	5	6	1		15	14	13
B4DL54;H0YHI0;P49356-2;H0YID9;H0YHA3;H0YJ25;H0YHB4;Q8WUH1-3;H0YIM3	B4DL54;H0YHI0;P49356-2	8;8;5;3;3;1;1;1;1	8;8;5;3;3;1;1;1;1	0;0;0;0;0;0;0;0;0		CHURC1-FNTB	>tr|B4DL54|B4DL54_HUMAN Protein farnesyltransferase subunit beta OS=Homo sapiens GN=FNTB PE=2 SV=1;>tr|H0YHI0|H0YHI0_HUMAN Protein CHURC1-FNTB (Fragment) OS=Homo sapiens GN=CHURC1-FNTB PE=4 SV=1;>sp|P49356-2|FNTB_HUMAN Isoform 2 of Protein farnesyltransfer	9	8	8	0	6	7	5	7	7	7	6	7	5	7	7	7	0	0	0	0	0	0	16.8	16.8	0	52.785	471	471;472;391;95;126;69;83;105;107	5.57	8	6	9	7	8	2		6	12	9	11	10	8
B4DL79;O95235;D6R9E4;D6RBN1	B4DL79;O95235	4;4;1;1	4;4;1;1	4;4;1;1	Kinesin-like protein KIF20A	KIF20A	>tr|B4DL79|B4DL79_HUMAN Kinesin-like protein KIF20A OS=Homo sapiens GN=KIF20A PE=1 SV=1;>sp|O95235|KI20A_HUMAN Kinesin-like protein KIF20A OS=Homo sapiens GN=KIF20A PE=1 SV=1	4	4	4	4	3	3	1	2	4	3	3	3	1	2	4	3	3	3	1	2	4	3	6	6	6	98.099	872	872;890;159;225	3.18	1	5	1	10							4	3	1
B4DL80;P30260;P30260-2;G5EA36;I3L394;I3L2Z8;I3L328;I3L3H6;F6QPS0	B4DL80;P30260;P30260-2;G5EA36	9;9;9;8;4;1;1;1;1	9;9;9;8;4;1;1;1;1	9;9;9;8;4;1;1;1;1	Cell division cycle protein 27 homolog	CDC27	>tr|B4DL80|B4DL80_HUMAN Cell division cycle protein 27 homolog OS=Homo sapiens GN=CDC27 PE=1 SV=1;>sp|P30260|CDC27_HUMAN Cell division cycle protein 27 homolog OS=Homo sapiens GN=CDC27 PE=1 SV=2;>sp|P30260-2|CDC27_HUMAN Isoform 2 of Cell division cycle pro	9	9	9	9	5	7	5	8	7	7	5	7	5	8	7	7	5	7	5	8	7	7	12.3	12.3	12.3	84.887	763	763;824;830;823;163;86;113;233;343	4.69	3	2	12	23	10		7	1	7		9	11	9
Q9H910;B4DLH4;A6NGP5;H3BMV3;Q9H910-2;H3BMT0;H3BTV5;H3BU16;H3BMM8;B4E1P3;H3BS08	Q9H910;B4DLH4;A6NGP5;H3BMV3;Q9H910-2;H3BMT0;H3BTV5;H3BU16	9;9;8;8;6;5;5;5;4;4;1	9;9;8;8;6;5;5;5;4;4;1	9;9;8;8;6;5;5;5;4;4;1	Hematological and neurological expressed 1-like protein	HN1L	>sp|Q9H910|HN1L_HUMAN Hematological and neurological expressed 1-like protein OS=Homo sapiens GN=HN1L PE=1 SV=1;>tr|B4DLH4|B4DLH4_HUMAN Hematological and neurological-expressed 1-like protein OS=Homo sapiens GN=HN1L PE=1 SV=1;>tr|A6NGP5|A6NGP5_HUMAN Hemato	11	9	9	9	8	8	9	9	8	8	8	8	9	9	8	8	8	8	9	9	8	8	56.8	56.8	56.8	20.063	190	190;218;178;190;174;115;116;167;70;98;77	3.49		22	36	39	16	1	1				21	20	18
B4DLN1;B4E1E9;I3L1E8	B4DLN1;B4E1E9	15;10;4	15;10;4	0;0;0		SLC25A10	>tr|B4DLN1|B4DLN1_HUMAN Mitochondrial dicarboxylate carrier OS=Homo sapiens GN=SLC25A10 PE=1 SV=1;>tr|B4E1E9|B4E1E9_HUMAN Mitochondrial dicarboxylate carrier OS=Homo sapiens GN=SLC25A10 PE=1 SV=1	3	15	15	0	15	14	11	14	13	12	15	14	11	14	13	12	0	0	0	0	0	0	41.9	41.9	0	48.099	442	442;244;113	5.89	5	11	31	29	16	8	17	16	21	26	33	32	28
B4DLR8;P15559-3;P15559-2;P15559;H3BNV2;H3BRK3	B4DLR8;P15559-3;P15559-2;P15559;H3BNV2;H3BRK3	7;7;7;7;5;5	7;7;7;7;5;5	7;7;7;7;5;5	NAD(P)H dehydrogenase [quinone] 1	NQO1	>tr|B4DLR8|B4DLR8_HUMAN NAD(P)H dehydrogenase [quinone] 1 OS=Homo sapiens GN=NQO1 PE=1 SV=1;>sp|P15559-3|NQO1_HUMAN Isoform 3 of NAD(P)H dehydrogenase [quinone] 1 OS=Homo sapiens GN=NQO1;>sp|P15559-2|NQO1_HUMAN Isoform 2 of NAD(P)H dehydrogenase [quinone]	6	7	7	7	7	7	4	7	7	7	7	7	4	7	7	7	7	7	4	7	7	7	38.1	38.1	38.1	22.793	202	202;236;240;274;253;269	5.92	10	5	1	5		16	17	12	12		12	14	10
B4DME1;E9PQE8;Q9Y296;E9PN70;E9PKS9;G3V1A0;G5EA23;J3KP27	B4DME1;E9PQE8;Q9Y296;E9PN70;E9PKS9	5;5;5;5;4;2;2;2	5;5;5;5;4;2;2;2	5;5;5;5;4;2;2;2	Trafficking protein particle complex subunit 4	TRAPPC4	>tr|B4DME1|B4DME1_HUMAN Trafficking protein particle complex subunit 4 OS=Homo sapiens GN=TRAPPC4 PE=1 SV=1;>tr|E9PQE8|E9PQE8_HUMAN Trafficking protein particle complex subunit 4 OS=Homo sapiens GN=TRAPPC4 PE=1 SV=1;>sp|Q9Y296|TPPC4_HUMAN Trafficking prote	8	5	5	5	5	3	5	4	3	4	5	3	5	4	3	4	5	3	5	4	3	4	29.7	29.7	29.7	18.446	165	165;176;219;257;126;117;126;181	8.23						2	9	6	6	7	7	3	7
H0Y4S7;B4DML5;G3XAG9;Q9BYM8;A6PVJ6;A6PVJ7;Q5JWR1;Q9BYM8-4;Q9BYM8-3	H0Y4S7;B4DML5;G3XAG9;Q9BYM8;A6PVJ6;A6PVJ7;Q5JWR1;Q9BYM8-4;Q9BYM8-3	2;2;2;2;1;1;1;1;1	2;2;2;2;1;1;1;1;1	2;2;2;2;1;1;1;1;1	RanBP-type and C3HC4-type zinc finger-containing protein 1	RBCK1	>tr|H0Y4S7|H0Y4S7_HUMAN RanBP-type and C3HC4-type zinc finger-containing protein 1 (Fragment) OS=Homo sapiens GN=RBCK1 PE=4 SV=1;>tr|B4DML5|B4DML5_HUMAN RanBP-type and C3HC4-type zinc finger-containing protein 1 OS=Homo sapiens GN=RBCK1 PE=1 SV=1;>tr|G3XAG	9	2	2	2	1	2	2	2	2	2	1	2	2	2	2	2	1	2	2	2	2	2	10.2	10.2	10.2	28.306	255	255;272;336;510;105;116;117;230;468	5.75				3	3		6				1	2	2
B4DMQ3;J3KT10;Q9BW27;J3QLD4;B4DPW1;J3QL54;J3QLV0;J3QLH0;J3KSH3;J3KRC0;F5H0W7	B4DMQ3;J3KT10;Q9BW27;J3QLD4;B4DPW1;J3QL54;J3QLV0;J3QLH0	4;4;4;3;3;3;2;2;1;1;1	4;4;4;3;3;3;2;2;1;1;1	4;4;4;3;3;3;2;2;1;1;1	Nuclear pore complex protein Nup85	NUP85	>tr|B4DMQ3|B4DMQ3_HUMAN Nuclear pore complex protein Nup85 OS=Homo sapiens GN=NUP85 PE=1 SV=1;>tr|J3KT10|J3KT10_HUMAN Nuclear pore complex protein Nup85 OS=Homo sapiens GN=NUP85 PE=1 SV=1;>sp|Q9BW27|NUP85_HUMAN Nuclear pore complex protein Nup85 OS=Homo sa	11	4	4	4	4	4	3	4	4	4	4	4	3	4	4	4	4	4	3	4	4	4	9	9	9	69.799	610	610;611;656;272;462;544;191;302;120;169;259	7.03		6	3				3	4	6	9	4	6	3
B4DN45;Q00266	B4DN45	9;2	1;0	1;0	S-adenosylmethionine synthase	MAT2A	>tr|B4DN45|B4DN45_HUMAN S-adenosylmethionine synthase OS=Homo sapiens GN=MAT2A PE=1 SV=1	2	9	1	1	8	8	9	8	8	8	0	0	1	0	0	0	0	0	1	0	0	0	39.8	3.3	3.3	32.964	299	299;395	7							1						1
E7ETU5;P29558-2;P29558;B4DN88;E7EPF2;C9J9B2;Q6XE24-3;Q6XE24-4;Q6XE24-5;Q6XE24-2;J3QT21;C9JIJ9;Q6XE24	E7ETU5;P29558-2;P29558;B4DN88;E7EPF2	3;3;3;3;2;1;1;1;1;1;1;1;1	3;3;3;3;2;1;1;1;1;1;1;1;1	2;2;2;2;1;1;1;1;1;1;1;1;1	RNA-binding motif, single-stranded-interacting protein 1	RBMS1	>tr|E7ETU5|E7ETU5_HUMAN RNA-binding motif, single-stranded-interacting protein 1 OS=Homo sapiens GN=RBMS1 PE=1 SV=1;>sp|P29558-2|RBMS1_HUMAN Isoform 2 of RNA-binding motif, single-stranded-interacting protein 1 OS=Homo sapiens GN=RBMS1;>sp|P29558|RBMS1_HUM	13	3	3	2	3	3	3	2	3	3	3	3	3	2	3	3	2	2	2	1	2	2	10.8	10.8	8.1	40.147	370	370;403;406;419;127;264;419;420;421;433;434;436;437	2.79		8	7	4							3	3	4
J3QL05;J3KP15;B4DN89;Q01130;Q9BRL6-2;Q9BRL6	J3QL05;J3KP15;B4DN89;Q01130;Q9BRL6-2;Q9BRL6	4;4;4;4;2;2	4;4;4;4;2;2	4;4;4;4;2;2	Serine/arginine-rich splicing factor 2;Serine/arginine-rich splicing factor 8	SRSF2;SFRS2;SRSF8	>tr|J3QL05|J3QL05_HUMAN Serine/arginine-rich-splicing factor 2 (Fragment) OS=Homo sapiens GN=SRSF2 PE=1 SV=1;>tr|J3KP15|J3KP15_HUMAN Serine/arginine-rich-splicing factor 2 (Fragment) OS=Homo sapiens GN=SRSF2 PE=1 SV=2;>tr|B4DN89|B4DN89_HUMAN Serine/arginin	6	4	4	4	4	4	4	4	4	4	4	4	4	4	4	4	4	4	4	4	4	4	32.3	32.3	32.3	15.156	130	130;133;209;221;275;282	2.67	5	27	25	12	1						14	11	11
H0YCR5;B4DNI8;Q9BQC3	H0YCR5;B4DNI8;Q9BQC3	1;1;1	1;1;1	1;1;1	Diphthamide biosynthesis protein 2	DPH2	>tr|H0YCR5|H0YCR5_HUMAN Diphthamide biosynthesis protein 2 (Fragment) OS=Homo sapiens GN=DPH2 PE=1 SV=1;>tr|B4DNI8|B4DNI8_HUMAN Diphthamide biosynthesis protein 2 OS=Homo sapiens GN=DPH2 PE=1 SV=1;>sp|Q9BQC3|DPH2_HUMAN Diphthamide biosynthesis protein 2 OS	3	1	1	1	1	1	1	1	1	1	1	1	1	1	1	1	1	1	1	1	1	1	5.7	5.7	5.7	27.845	262	262;354;489	10										6	1	1	1
B4DNI9;Q8N1B4	B4DNI9;Q8N1B4	5;5	5;5	5;5	Vacuolar protein sorting-associated protein 52 homolog	VPS52	>tr|B4DNI9|B4DNI9_HUMAN Vacuolar protein sorting-associated protein 52 homolog OS=Homo sapiens GN=VPS52 PE=1 SV=1;>sp|Q8N1B4|VPS52_HUMAN Vacuolar protein sorting-associated protein 52 homolog OS=Homo sapiens GN=VPS52 PE=1 SV=1	2	5	5	5	4	4	3	4	5	3	4	4	3	4	5	3	4	4	3	4	5	3	8.5	8.5	8.5	68.495	598	598;723	4.69		6	5	9	5			1	6		6	6	4
Q9Y3F4;B4DNJ6;B0AZV0;H0YH33	Q9Y3F4;B4DNJ6;B0AZV0	15;15;11;4	15;15;11;4	15;15;11;4	Serine-threonine kinase receptor-associated protein	STRAP	>sp|Q9Y3F4|STRAP_HUMAN Serine-threonine kinase receptor-associated protein OS=Homo sapiens GN=STRAP PE=1 SV=1;>tr|B4DNJ6|B4DNJ6_HUMAN Serine-threonine kinase receptor-associated protein OS=Homo sapiens GN=STRAP PE=1 SV=1;>tr|B0AZV0|B0AZV0_HUMAN Serine-thre	4	15	15	15	14	13	15	15	14	14	14	13	15	15	14	14	14	13	15	15	14	14	56	56	56	38.438	350	350;363;256;95	4.88	27	41	31	22	35	45	40	29	11	5	50	49	47
Q03154;B4DNW0;Q03154-2;Q03154-4;C9JMV9;Q03154-3;F8WC59;C9JYZ0	Q03154;B4DNW0;Q03154-2;Q03154-4;C9JMV9;Q03154-3	11;11;10;9;9;7;5;5	11;11;10;9;9;7;5;5	11;11;10;9;9;7;5;5	Aminoacylase-1	ACY1;ABHD14A-ACY1	>sp|Q03154|ACY1_HUMAN Aminoacylase-1 OS=Homo sapiens GN=ACY1 PE=1 SV=1;>tr|B4DNW0|B4DNW0_HUMAN Aminoacylase-1 OS=Homo sapiens GN=ACY1 PE=1 SV=1;>sp|Q03154-2|ACY1_HUMAN Isoform 2 of Aminoacylase-1 OS=Homo sapiens GN=ACY1;>sp|Q03154-4|ACY1_HUMAN Isoform 4 of	8	11	11	11	9	9	8	10	10	11	9	9	8	10	10	11	9	9	8	10	10	11	30.1	30.1	30.1	45.884	408	408;498;336;373;509;343;201;228	5.08		12	20	6	13	16	5	3	6	6	14	14	10
K7EII2;B4DP81;Q8TAP6-2;Q8TAP6	K7EII2;B4DP81;Q8TAP6-2;Q8TAP6	1;1;1;1	1;1;1;1	1;1;1;1	Centrosomal protein of 76 kDa	CEP76	>tr|K7EII2|K7EII2_HUMAN Centrosomal protein of 76 kDa OS=Homo sapiens GN=CEP76 PE=4 SV=1;>tr|B4DP81|B4DP81_HUMAN Centrosomal protein of 76 kDa OS=Homo sapiens GN=CEP76 PE=1 SV=1;>sp|Q8TAP6-2|CEP76_HUMAN Isoform 2 of Centrosomal protein of 76 kDa OS=Homo sa	4	1	1	1	1	1	1	1	1	1	1	1	1	1	1	1	1	1	1	1	1	1	23	23	23	8.5769	74	74;112;584;659	1	6										1	1	1
B4DPY5;Q9Y5W9;J3QRB9;J3KTN6;B4DKH7;J3QLV8;B4DJI7	B4DPY5;Q9Y5W9;J3QRB9;J3KTN6;B4DKH7;J3QLV8	3;3;2;2;2;2;1	3;3;2;2;2;2;1	3;3;2;2;2;2;1	Sorting nexin-11	SNX11	>tr|B4DPY5|B4DPY5_HUMAN Sorting nexin-11 OS=Homo sapiens GN=SNX11 PE=2 SV=1;>sp|Q9Y5W9|SNX11_HUMAN Sorting nexin-11 OS=Homo sapiens GN=SNX11 PE=1 SV=2;>tr|J3QRB9|J3QRB9_HUMAN Sorting nexin-11 (Fragment) OS=Homo sapiens GN=SNX11 PE=4 SV=1;>tr|J3KTN6|J3KTN6_	7	3	3	3	2	2	3	3	2	2	2	2	3	3	2	2	2	2	3	3	2	2	15.3	15.3	15.3	29.423	262	262;270;172;177;209;254;126	5.4		2	5	2					6		2	2	3
B4DQH9;Q6VN20;R4GMX8;B3KP49;B4DID0;B4DHL9	B4DQH9;Q6VN20;R4GMX8;B3KP49;B4DID0	3;3;3;2;2;1	2;2;2;2;2;1	2;2;2;2;2;1	Ran-binding protein 10	RANBP10	>tr|B4DQH9|B4DQH9_HUMAN Ran-binding protein 10 OS=Homo sapiens GN=RANBP10 PE=1 SV=1;>sp|Q6VN20|RBP10_HUMAN Ran-binding protein 10 OS=Homo sapiens GN=RANBP10 PE=1 SV=1;>tr|R4GMX8|R4GMX8_HUMAN Ran-binding protein 10 OS=Homo sapiens GN=RANBP10 PE=1 SV=1;>tr|B	6	3	2	2	1	2	2	1	2	1	0	1	1	0	1	1	0	1	1	0	1	1	6.9	4	4	64.541	594	594;620;650;391;533;179	4		1	2					1				1	1
B4DQJ8;P52209;F5H7U0;K7EM49;K7ELN9;K7EPF6;K7EMN2	B4DQJ8;P52209;F5H7U0	21;21;20;8;7;7;6	21;21;20;8;7;7;6	21;21;20;8;7;7;6	6-phosphogluconate dehydrogenase, decarboxylating	PGD	>tr|B4DQJ8|B4DQJ8_HUMAN 6-phosphogluconate dehydrogenase, decarboxylating OS=Homo sapiens GN=PGD PE=1 SV=1;>sp|P52209|6PGD_HUMAN 6-phosphogluconate dehydrogenase, decarboxylating OS=Homo sapiens GN=PGD PE=1 SV=3;>tr|F5H7U0|F5H7U0_HUMAN Uncharacterized prot	7	21	21	21	21	21	14	17	18	20	21	21	14	17	18	20	21	21	14	17	18	20	57.7	57.7	57.7	51.872	470	470;483;461;205;224;256;160	5.73		36	24	36	42	29	68	36	4	24	56	55	40
G3V2V8;B4DQV7;J3KMY5;P61916;H0YIZ1;G3V3E8;E7EMS2;G3V3D1	G3V2V8;B4DQV7;J3KMY5;P61916;H0YIZ1;G3V3E8;E7EMS2;G3V3D1	3;3;3;3;3;3;3;3	3;3;3;3;3;3;3;3	3;3;3;3;3;3;3;3	Epididymal secretory protein E1	NPC2	>tr|G3V2V8|G3V2V8_HUMAN Epididymal secretory protein E1 (Fragment) OS=Homo sapiens GN=NPC2 PE=1 SV=1;>tr|B4DQV7|B4DQV7_HUMAN Epididymal secretory protein E1 OS=Homo sapiens GN=NPC2 PE=1 SV=1;>tr|J3KMY5|J3KMY5_HUMAN Epididymal secretory protein E1 OS=Homo s	8	3	3	3	3	3	3	3	3	3	3	3	3	3	3	3	3	3	3	3	3	3	39.3	39.3	39.3	13.078	122	122;125;148;151;173;174;201;221	4.37		12	6	2	3				4	3	5	4	6
Q99880;Q99879;Q99877;Q93079;Q5QNW6;P62807;P58876;P57053;O60814;Q5QNW6-2;U3KQK0;B4DR52;Q16778;P33778;P23527;P06899;Q8N257;Q96A08	Q99880;Q99879;Q99877;Q93079;Q5QNW6;P62807;P58876;P57053;O60814;Q5QNW6-2;U3KQK0;B4DR52;Q16778;P33778;P23527;P06899;Q8N257;Q96A08	6;6;6;6;6;6;6;6;6;6;6;6;4;4;4;4;3;3	6;6;6;6;6;6;6;6;6;6;6;6;4;4;4;4;3;3	6;6;6;6;6;6;6;6;6;6;6;6;4;4;4;4;3;3	Histone H2B type 1-L;Histone H2B type 1-M;Histone H2B type 1-N;Histone H2B type 1-H;Histone H2B type 2-F;Histone H2B type 1-C/E/F/G/I;Histone H2B type 1-D;Histone H2B type F-S;Histone H2B type 1-K;Histone H2B;Histone H2B type 2-E;Histone H2B type 1-B;Histone H2B type 1-O;Histone H2B type 1-J;Histone H2B type 3-B;Histone H2B type 1-A	HIST1H2BL;HIST1H2BM;HIST1H2BN;HIST1H2BH;HIST2H2BF;HIST1H2BC;HIST1H2BD;H2BFS;HIST1H2BK;HIST2H2BE;HIST1H2BB;HIST1H2BO;HIST1H2BJ;HIST3H2BB;HIST1H2BA	>sp|Q99880|H2B1L_HUMAN Histone H2B type 1-L OS=Homo sapiens GN=HIST1H2BL PE=1 SV=3;>sp|Q99879|H2B1M_HUMAN Histone H2B type 1-M OS=Homo sapiens GN=HIST1H2BM PE=1 SV=3;>sp|Q99877|H2B1N_HUMAN Histone H2B type 1-N OS=Homo sapiens GN=HIST1H2BN PE=1 SV=3;>sp|Q93	18	6	6	6	6	5	6	6	6	5	6	5	6	6	6	5	6	5	6	6	6	5	41.3	41.3	41.3	13.952	126	126;126;126;126;126;126;126;126;126;134;166;166;126;126;126;126;126;127	5.27	19	28	8				8	16	27	7	17	18	23
P61619;B4DR61;P61619-3;F8W776;Q8TC24;Q9H9S3-2;Q9H9S3-3;Q9H9S3;H7C1Q9;C9JXC6;H7C069;A6NK38;F2Z2C7;A6NIF9;C9JJV4	P61619;B4DR61;P61619-3;F8W776;Q8TC24;Q9H9S3-2;Q9H9S3-3;Q9H9S3	9;9;5;5;5;5;5;5;4;4;4;4;4;4;4	9;9;5;5;5;5;5;5;4;4;4;4;4;4;4	9;9;5;5;5;5;5;5;4;4;4;4;4;4;4	Protein transport protein Sec61 subunit alpha isoform 1;Protein transport protein Sec61 subunit alpha isoform 2	SEC61A1;SEC61A2	>sp|P61619|S61A1_HUMAN Protein transport protein Sec61 subunit alpha isoform 1 OS=Homo sapiens GN=SEC61A1 PE=1 SV=2;>tr|B4DR61|B4DR61_HUMAN Protein transport protein Sec61 subunit alpha isoform 1 OS=Homo sapiens GN=SEC61A1 PE=1 SV=1;>sp|P61619-3|S61A1_HUMA	15	9	9	9	7	7	6	5	6	7	7	7	6	5	6	7	7	7	6	5	6	7	23.7	23.7	23.7	52.264	476	476;482;357;410;418;437;454;476;94;101;145;159;162;168;189	4.18	16	22	15	10	6	7	5	6	6	6	17	18	13
B4DR80;Q9Y6E0-2;Q9Y6E0;H0Y630;Q5JV98;Q5JV99	B4DR80;Q9Y6E0-2;Q9Y6E0;H0Y630;Q5JV98	18;18;17;15;10;6	18;18;17;15;10;6	11;11;10;9;7;4	Serine/threonine-protein kinase 24;Serine/threonine-protein kinase 24 36 kDa subunit;Serine/threonine-protein kinase 24 12 kDa subunit	STK24	>tr|B4DR80|B4DR80_HUMAN Serine/threonine-protein kinase 24 12 kDa subunit OS=Homo sapiens GN=STK24 PE=1 SV=1;>sp|Q9Y6E0-2|STK24_HUMAN Isoform A of Serine/threonine-protein kinase 24 OS=Homo sapiens GN=STK24;>sp|Q9Y6E0|STK24_HUMAN Serine/threonine-protein k	6	18	18	11	15	17	14	14	16	15	15	17	14	14	16	15	8	10	7	7	9	8	51.5	51.5	36.9	45.835	412	412;431;443;369;209;142	4.23	16	36	25	19	11	12	13	6	13	3	25	28	25
Q02809;B4DR87;Q5JXB9;Q5JXB7;Q5JXB8	Q02809;B4DR87	22;22;4;4;3	22;22;4;4;3	22;22;4;4;3	Procollagen-lysine,2-oxoglutarate 5-dioxygenase 1	PLOD1	>sp|Q02809|PLOD1_HUMAN Procollagen-lysine,2-oxoglutarate 5-dioxygenase 1 OS=Homo sapiens GN=PLOD1 PE=1 SV=2;>tr|B4DR87|B4DR87_HUMAN Procollagen-lysine,2-oxoglutarate 5-dioxygenase 1 OS=Homo sapiens GN=PLOD1 PE=1 SV=1	5	22	22	22	21	22	16	18	20	22	21	22	16	18	20	22	21	22	16	18	20	22	36.5	36.5	36.5	83.549	727	727;774;199;283;225	5.73	5	30	26	17	33	31	16	18	32	20	41	41	33
B4DRC2;Q9UQR0	B4DRC2;Q9UQR0	2;2	2;2	2;2	Sex comb on midleg-like protein 2	SCML2	>tr|B4DRC2|B4DRC2_HUMAN Sex comb on midleg-like protein 2 OS=Homo sapiens GN=SCML2 PE=1 SV=1;>sp|Q9UQR0|SCML2_HUMAN Sex comb on midleg-like protein 2 OS=Homo sapiens GN=SCML2 PE=1 SV=1	2	2	2	2	2	2	2	2	1	2	2	2	2	2	1	2	2	2	2	2	1	2	8.4	8.4	8.4	37.605	345	345;700	8.56								7	9		3	2	3
F5GZP8;Q7Z5G9;Q5JVZ5;Q96JJ3;B4DRL5;B4DZ20;Q5JVZ8;Q5JW01;Q92556-3;H0YCM7;Q92556;H7C0S6;H7C3P3;Q92556-2;Q5JVZ4	F5GZP8;Q7Z5G9;Q5JVZ5;Q96JJ3;B4DRL5;B4DZ20;Q5JVZ8;Q5JW01;Q92556-3;H0YCM7;Q92556	4;4;4;4;4;3;2;2;2;2;2;1;1;1;1	4;4;4;4;4;3;2;2;2;2;2;1;1;1;1	4;4;4;4;4;3;2;2;2;2;2;1;1;1;1	Engulfment and cell motility protein 2;Engulfment and cell motility protein 1	ELMO2;ELMO1	>tr|F5GZP8|F5GZP8_HUMAN Engulfment and cell motility protein 2 OS=Homo sapiens GN=ELMO2 PE=1 SV=1;>tr|Q7Z5G9|Q7Z5G9_HUMAN ELMO2 protein OS=Homo sapiens GN=ELMO2 PE=1 SV=1;>tr|Q5JVZ5|Q5JVZ5_HUMAN Engulfment and cell motility protein 2 OS=Homo sapiens GN=ELM	15	4	4	4	3	4	4	4	4	4	3	4	4	4	4	4	3	4	4	4	4	4	7.3	7.3	7.3	62.135	537	537;632;718;720;732;452;267;283;429;441;727;182;193;247;338	6.6		4	11			1	6		12	8	7	8	8
Q5W0Z9-2;B4DRN8;Q2TB82;Q5W0Z9-3;Q5W0Z9	Q5W0Z9-2;B4DRN8;Q2TB82;Q5W0Z9-3;Q5W0Z9	1;1;1;1;1	1;1;1;1;1	1;1;1;1;1	Probable palmitoyltransferase ZDHHC20	ZDHHC20	>sp|Q5W0Z9-2|ZDH20_HUMAN Isoform 2 of Probable palmitoyltransferase ZDHHC20 OS=Homo sapiens GN=ZDHHC20;>tr|B4DRN8|B4DRN8_HUMAN Palmitoyltransferase OS=Homo sapiens GN=ZDHHC20 PE=1 SV=1;>tr|Q2TB82|Q2TB82_HUMAN Palmitoyltransferase OS=Homo sapiens GN=ZDHHC20	5	1	1	1	0	1	0	0	1	1	0	1	0	0	1	1	0	1	0	0	1	1	8.5	8.5	8.5	15.419	130	130;292;320;354;365	6						3						1
H7C0X4;B4DS50;Q92685-2;C9J7S5;Q92685	H7C0X4;B4DS50;Q92685-2;C9J7S5;Q92685	2;2;2;2;2	2;2;2;2;2	2;2;2;2;2	Dol-P-Man:Man(5)GlcNAc(2)-PP-Dol alpha-1,3-mannosyltransferase	ALG3	>tr|H7C0X4|H7C0X4_HUMAN Dol-P-Man:Man(5)GlcNAc(2)-PP-Dol alpha-1,3-mannosyltransferase (Fragment) OS=Homo sapiens GN=ALG3 PE=1 SV=1;>tr|B4DS50|B4DS50_HUMAN Dol-P-Man:Man(5)GlcNAc(2)-PP-Dol alpha-1,3-mannosyltransferase OS=Homo sapiens GN=ALG3 PE=2 SV=1;>sp	5	2	2	2	2	2	1	2	2	2	2	2	1	2	2	2	2	2	1	2	2	2	6.2	6.2	6.2	36.898	323	323;382;390;398;438	8.9								6	10	4	4	3	3
B4DS52;Q96J42-2;H0Y997;Q96J42;H0Y928	B4DS52;Q96J42-2;H0Y997;Q96J42;H0Y928	3;3;3;3;2	3;3;3;3;2	3;3;3;3;2	Thioredoxin domain-containing protein 15	TXNDC15	>tr|B4DS52|B4DS52_HUMAN Thioredoxin domain-containing protein 15 OS=Homo sapiens GN=TXNDC15 PE=2 SV=1;>sp|Q96J42-2|TXD15_HUMAN Isoform 2 of Thioredoxin domain-containing protein 15 OS=Homo sapiens GN=TXNDC15;>tr|H0Y997|H0Y997_HUMAN Thioredoxin domain-conta	5	3	3	3	1	2	1	1	2	1	1	2	1	1	2	1	1	2	1	1	2	1	12.5	12.5	12.5	37.249	337	337;343;344;360;115	9.33		1							2	12	2	3	2
Q96AE4;E9PEB5;B4DT31;M0R251;M0R263	Q96AE4;E9PEB5;B4DT31	19;19;19;1;1	1;1;1;0;0	1;1;1;0;0	Far upstream element-binding protein 1	FUBP1	>sp|Q96AE4|FUBP1_HUMAN Far upstream element-binding protein 1 OS=Homo sapiens GN=FUBP1 PE=1 SV=3;>tr|E9PEB5|E9PEB5_HUMAN Far upstream element-binding protein 1 OS=Homo sapiens GN=FUBP1 PE=1 SV=1;>tr|B4DT31|B4DT31_HUMAN Far upstream element-binding protein	5	19	1	1	18	19	19	17	17	19	0	1	1	0	0	1	0	1	1	0	0	1	35.1	3.3	3.3	67.56	644	644;655;665;79;143	5.33					2	1						1	1
B4DT69;P09622;E9PEX6;B4DHG0;F8WDM5;F2Z2E3	B4DT69;P09622;E9PEX6;B4DHG0	12;12;11;9;3;3	12;12;11;9;3;3	12;12;11;9;3;3	Dihydrolipoyl dehydrogenase;Dihydrolipoyl dehydrogenase, mitochondrial	DLD	>tr|B4DT69|B4DT69_HUMAN Dihydrolipoyl dehydrogenase, mitochondrial OS=Homo sapiens GN=DLD PE=1 SV=1;>sp|P09622|DLDH_HUMAN Dihydrolipoyl dehydrogenase, mitochondrial OS=Homo sapiens GN=DLD PE=1 SV=2;>tr|E9PEX6|E9PEX6_HUMAN Dihydrolipoyl dehydrogenase, mitoc	6	12	12	12	12	12	11	11	11	10	12	12	11	11	11	10	12	12	11	11	11	10	36.2	36.2	36.2	49.282	461	461;509;486;410;114;115	6.08		16	19	21	33	28	27	16	23	21	38	33	41
J3QS48;I3L295;J3KTK8;J3QQZ4;J3KT75;B4DT74;J3QW43;J3QRD5;O75352;J3KSI4;I3L405;I3L261;I3L1D2;I3L4E0	J3QS48;I3L295;J3KTK8;J3QQZ4;J3KT75;B4DT74;J3QW43;J3QRD5;O75352;J3KSI4;I3L405;I3L261;I3L1D2;I3L4E0	2;2;2;2;2;2;2;2;2;1;1;1;1;1	2;2;2;2;2;2;2;2;2;1;1;1;1;1	2;2;2;2;2;2;2;2;2;1;1;1;1;1	Mannose-P-dolichol utilization defect 1 protein	MPDU1	>tr|J3QS48|J3QS48_HUMAN Mannose-P-dolichol utilization defect 1 protein OS=Homo sapiens GN=MPDU1 PE=1 SV=1;>tr|I3L295|I3L295_HUMAN Mannose-P-dolichol utilization defect 1 protein OS=Homo sapiens GN=MPDU1 PE=1 SV=1;>tr|J3KTK8|J3KTK8_HUMAN Mannose-P-dolichol	14	2	2	2	2	2	1	2	2	2	2	2	1	2	2	2	2	2	1	2	2	2	23.8	23.8	23.8	10.978	101	101;109;116;152;154;186;192;193;247;52;54;61;61;75	9.86									2	12	3	2	2
B4DT77;P20073-2;P20073	B4DT77;P20073-2;P20073	15;15;15	15;15;15	15;15;15	Annexin;Annexin A7	ANXA7	>tr|B4DT77|B4DT77_HUMAN Annexin OS=Homo sapiens GN=ANXA7 PE=1 SV=1;>sp|P20073-2|ANXA7_HUMAN Isoform 2 of Annexin A7 OS=Homo sapiens GN=ANXA7;>sp|P20073|ANXA7_HUMAN Annexin A7 OS=Homo sapiens GN=ANXA7 PE=1 SV=3	3	15	15	15	15	15	14	15	15	15	15	15	14	15	15	15	15	15	14	15	15	15	42.6	42.6	42.6	37.805	336	336;466;488	5.24	7	47	29	14	19	34	11	7	25	23	35	40	33
H0YA96;H0Y8G5;Q14103-4;B4DTC3;Q14103-3;Q14103-2;Q14103;D6RAF8;D6RF44;D6RBQ9;D6RD83;F5H6R6	H0YA96;H0Y8G5;Q14103-4;B4DTC3;Q14103-3;Q14103-2;Q14103;D6RAF8;D6RF44;D6RBQ9	11;11;11;11;11;11;11;8;7;6;5;5	11;11;11;11;11;11;11;8;7;6;5;5	10;10;10;10;10;10;10;7;6;5;5;5	Heterogeneous nuclear ribonucleoprotein D0	HNRNPD	>tr|H0YA96|H0YA96_HUMAN Heterogeneous nuclear ribonucleoprotein D0 (Fragment) OS=Homo sapiens GN=HNRNPD PE=1 SV=1;>tr|H0Y8G5|H0Y8G5_HUMAN Heterogeneous nuclear ribonucleoprotein D0 (Fragment) OS=Homo sapiens GN=HNRNPD PE=1 SV=2;>sp|Q14103-4|HNRPD_HUMAN Iso	12	11	11	10	11	11	11	11	11	11	11	11	11	11	11	11	10	10	10	10	10	10	45.7	45.7	41.9	23.811	210	210;260;287;303;306;336;355;221;111;155;92;201	4.95		43	43	19	4		1	2	27	22	29	31	26
B4DTG6;Q8ND56-2;Q8ND56;K7EMZ9;I3L4Q1	B4DTG6;Q8ND56-2;Q8ND56;K7EMZ9	7;7;7;5;2	7;7;7;5;2	7;7;7;5;2	Protein LSM14 homolog A	LSM14A	>tr|B4DTG6|B4DTG6_HUMAN Protein LSM14 homolog A OS=Homo sapiens GN=LSM14A PE=1 SV=1;>sp|Q8ND56-2|LS14A_HUMAN Isoform 2 of Protein LSM14 homolog A OS=Homo sapiens GN=LSM14A;>sp|Q8ND56|LS14A_HUMAN Protein LSM14 homolog A OS=Homo sapiens GN=LSM14A PE=1 SV=3;>	5	7	7	7	7	7	4	6	6	6	7	7	4	6	6	6	7	7	4	6	6	6	19	19	19	46.411	422	422;463;463;333;102	2.65	10	15	1	14	3						8	8	4
P20936-2;B4DTL2;E9PGC0;P20936;Q68CU6	P20936-2;B4DTL2;E9PGC0;P20936	18;18;18;18;1	18;18;18;18;1	18;18;18;18;1	Ras GTPase-activating protein 1	RASA1	>sp|P20936-2|RASA1_HUMAN Isoform 2 of Ras GTPase-activating protein 1 OS=Homo sapiens GN=RASA1;>tr|B4DTL2|B4DTL2_HUMAN Ras GTPase-activating protein 1 OS=Homo sapiens GN=RASA1 PE=1 SV=1;>tr|E9PGC0|E9PGC0_HUMAN Ras GTPase-activating protein 1 OS=Homo sapien	5	18	18	18	14	15	15	17	15	16	14	15	15	17	15	16	14	15	15	17	15	16	24.7	24.7	24.7	100.4	870	870;880;881;1047;539	6.49		19	11	5	2	4	19	24	7	22	16	17	21
B4DTR1;J3QLU9;P04626-5;P04626-4;P04626;J3QRX1;F5H1T4	B4DTR1;J3QLU9;P04626-5;P04626-4;P04626;J3QRX1;F5H1T4	2;2;2;2;2;1;1	1;1;1;1;1;1;1	1;1;1;1;1;1;1	Receptor tyrosine-protein kinase erbB-2	ERBB2	>tr|B4DTR1|B4DTR1_HUMAN Receptor tyrosine-protein kinase erbB-2 OS=Homo sapiens GN=ERBB2 PE=1 SV=1;>tr|J3QLU9|J3QLU9_HUMAN Receptor tyrosine-protein kinase erbB-2 OS=Homo sapiens GN=ERBB2 PE=3 SV=1;>sp|P04626-5|ERBB2_HUMAN Isoform 5 of Receptor tyrosine-pr	7	2	1	1	2	2	2	2	2	2	1	1	1	1	1	1	1	1	1	1	1	1	2.7	1.4	1.4	107.57	979	979;1055;1225;1240;1255;166;603	4				6							1	1	1
F5GZ28;B4DTU4;P18858;M0R0Q7;Q2TB12;B4E135	F5GZ28;B4DTU4;P18858;M0R0Q7;Q2TB12	13;13;13;10;10;4	13;13;13;10;10;4	13;13;13;10;10;4	DNA ligase;DNA ligase 1	LIG1	>tr|F5GZ28|F5GZ28_HUMAN DNA ligase OS=Homo sapiens GN=LIG1 PE=1 SV=1;>tr|B4DTU4|B4DTU4_HUMAN DNA ligase OS=Homo sapiens GN=LIG1 PE=1 SV=1;>sp|P18858|DNLI1_HUMAN DNA ligase 1 OS=Homo sapiens GN=LIG1 PE=1 SV=1;>tr|M0R0Q7|M0R0Q7_HUMAN DNA ligase OS=Homo sapie	6	13	13	13	11	12	9	11	13	13	11	12	9	11	13	13	11	12	9	11	13	13	19	19	19	93.946	851	851;888;919;800;801;415	4.72	33	15		5	4		4	13	18	7	16	17	14
Q13126;B4DUC8;Q13126-4;Q13126-3;Q13126-2;Q13126-7;J3QSB7;Q13126-6;Q13126-5;F2Z2F3;F8WES2;J3KRN1	Q13126;B4DUC8;Q13126-4;Q13126-3;Q13126-2;Q13126-7;J3QSB7;Q13126-6;Q13126-5;F2Z2F3	17;17;16;16;16;15;15;15;15;9;2;1	17;17;16;16;16;15;15;15;15;9;2;1	17;17;16;16;16;15;15;15;15;9;2;1	S-methyl-5-thioadenosine phosphorylase;Purine nucleoside phosphorylase	MTAP	>sp|Q13126|MTAP_HUMAN S-methyl-5-thioadenosine phosphorylase OS=Homo sapiens GN=MTAP PE=1 SV=2;>tr|B4DUC8|B4DUC8_HUMAN S-methyl-5-thioadenosine phosphorylase OS=Homo sapiens GN=MTAP PE=1 SV=1;>sp|Q13126-4|MTAP_HUMAN Isoform 4 of S-methyl-5-thioadenosine	12	17	17	17	16	17	16	16	17	17	16	17	16	16	17	17	16	17	16	16	17	17	70	70	70	31.236	283	283;300;280;334;346;239;242;293;305;143;50;112	4.82		36	36	30	4	9	13	24	13	4	31	31	27
B4DUE9;Q13530;Q5H936	B4DUE9;Q13530;Q5H936	2;2;1	2;2;1	2;2;1	Serine incorporator 3	SERINC3	>tr|B4DUE9|B4DUE9_HUMAN Serine incorporator 3 OS=Homo sapiens GN=SERINC3 PE=2 SV=1;>sp|Q13530|SERC3_HUMAN Serine incorporator 3 OS=Homo sapiens GN=SERINC3 PE=2 SV=2;>tr|Q5H936|Q5H936_HUMAN Serine incorporator 3 (Fragment) OS=Homo sapiens GN=SERINC3 PE=4 SV	3	2	2	2	1	2	2	2	2	2	1	2	2	2	2	2	1	2	2	2	2	2	4.3	4.3	4.3	46.821	418	418;473;212	5.7			3	4		2	11				2	4	3
F8VRR3;G3XA91;B4DUX5;F8VQZ7;P50579;G3V1U3;F8VZX9;F8VY03	F8VRR3;G3XA91;B4DUX5;F8VQZ7;P50579	11;11;11;11;11;4;2;2	11;11;11;11;11;4;2;2	11;11;11;11;11;4;2;2	Methionine aminopeptidase;Methionine aminopeptidase 2	METAP2	>tr|F8VRR3|F8VRR3_HUMAN Methionine aminopeptidase 2 OS=Homo sapiens GN=METAP2 PE=1 SV=1;>tr|G3XA91|G3XA91_HUMAN Methionine aminopeptidase 2 OS=Homo sapiens GN=METAP2 PE=1 SV=1;>tr|B4DUX5|B4DUX5_HUMAN Methionine aminopeptidase 2 OS=Homo sapiens GN=METAP2 PE	8	11	11	11	11	10	9	10	9	10	11	10	9	10	9	10	11	10	9	10	9	10	30.1	30.1	30.1	48.876	442	442;455;455;477;478;328;163;178	5.34	13	13	4	25	29	14	13	7	23	4	26	23	24
B4DV78;H7C0B6	B4DV78	27;12	2;0	2;0		VIL1	>tr|B4DV78|B4DV78_HUMAN Villin-1 OS=Homo sapiens GN=VIL1 PE=1 SV=1	2	27	2	2	26	27	24	26	26	26	1	2	2	2	1	2	1	2	2	2	1	2	60.3	1.7	1.7	57.983	516	516;213	7.93							6	3	5		2	3	2
Q15717;B4DVB8;M0QZR9;M0R055;B1AM48;Q12926-2;Q12926;P26378-4;P26378-2;P26378-5;B1APY9;P26378;P26378-3;B1APY8;B1AM49	Q15717;B4DVB8	11;11;5;1;1;1;1;1;1;1;1;1;1;1;1	11;11;5;1;1;1;1;1;1;1;1;1;1;1;1	11;11;5;1;1;1;1;1;1;1;1;1;1;1;1	ELAV-like protein 1	ELAVL1	>sp|Q15717|ELAV1_HUMAN ELAV-like protein 1 OS=Homo sapiens GN=ELAVL1 PE=1 SV=2;>tr|B4DVB8|B4DVB8_HUMAN ELAV-like protein 1 OS=Homo sapiens GN=ELAVL1 PE=1 SV=1	15	11	11	11	11	11	11	11	11	11	11	11	11	11	11	11	11	11	11	11	11	11	44.5	44.5	44.5	36.091	326	326;353;153;133;189;346;359;366;366;369;371;380;383;385;387	5.85		17	20	33	17	3	20	10	22	20	27	26	26
B4DVY1;O15371;B0QYA5;B0QYA4;B0QYA6;B0QYA7;B0QYA8	B4DVY1;O15371	14;14;5;3;2;2;1	14;14;5;3;2;2;1	14;14;5;3;2;2;1	Eukaryotic translation initiation factor 3 subunit D	EIF3D	>tr|B4DVY1|B4DVY1_HUMAN Eukaryotic translation initiation factor 3 subunit D OS=Homo sapiens GN=EIF3D PE=1 SV=1;>sp|O15371|EIF3D_HUMAN Eukaryotic translation initiation factor 3 subunit D OS=Homo sapiens GN=EIF3D PE=1 SV=1	7	14	14	14	14	14	11	11	12	10	14	14	11	11	12	10	14	14	11	11	12	10	42.9	42.9	42.9	58.14	499	499;548;269;105;173;186;123	5.76		22	19	11	14	17	20	15	4	21	29	27	21
Q86WQ0;B4DW92;U3KQ53;F5H0B6	Q86WQ0;B4DW92;U3KQ53	4;4;2;1	4;4;2;1	4;4;2;1	Nuclear receptor 2C2-associated protein	NR2C2AP	>sp|Q86WQ0|NR2CA_HUMAN Nuclear receptor 2C2-associated protein OS=Homo sapiens GN=NR2C2AP PE=1 SV=1;>tr|B4DW92|B4DW92_HUMAN Nuclear receptor 2C2-associated protein OS=Homo sapiens GN=NR2C2AP PE=1 SV=1;>tr|U3KQ53|U3KQ53_HUMAN Nuclear receptor 2C2-associated	4	4	4	4	4	4	3	3	4	3	4	4	3	3	4	3	4	4	3	3	4	3	32.4	32.4	32.4	15.876	139	139;167;127;54	3.44		12	6	6					3		5	5	5
B4DWB0;Q8TB37;F8W0A2;H0YHR7;F8W061;Q8TB37-2	B4DWB0;Q8TB37;F8W0A2	3;3;2;1;1;1	3;3;2;1;1;1	3;3;2;1;1;1	Iron-sulfur protein NUBPL	NUBPL	>tr|B4DWB0|B4DWB0_HUMAN Iron-sulfur protein NUBPL OS=Homo sapiens GN=NUBPL PE=1 SV=1;>sp|Q8TB37|NUBPL_HUMAN Iron-sulfur protein NUBPL OS=Homo sapiens GN=NUBPL PE=1 SV=3;>tr|F8W0A2|F8W0A2_HUMAN Iron-sulfur protein NUBPL (Fragment) OS=Homo sapiens GN=NUBPL P	6	3	3	3	3	3	1	2	1	3	3	3	1	2	1	3	3	3	1	2	1	3	20.6	20.6	20.6	24.415	223	223;319;167;130;133;173	6			6	1	1		3		2	3	4	3	1
B4DWW1;P40616;F8VYN9;B4DZG7;F8VP99;F8W1Z8;F8VP63	B4DWW1;P40616;F8VYN9;B4DZG7	8;8;7;6;1;1;1	8;8;7;6;1;1;1	8;8;7;6;1;1;1	ADP-ribosylation factor-like protein 1	ARL1	>tr|B4DWW1|B4DWW1_HUMAN ADP-ribosylation factor-like protein 1 OS=Homo sapiens GN=ARL1 PE=1 SV=1;>sp|P40616|ARL1_HUMAN ADP-ribosylation factor-like protein 1 OS=Homo sapiens GN=ARL1 PE=1 SV=1;>tr|F8VYN9|F8VYN9_HUMAN ADP-ribosylation factor-like protein 1 O	7	8	8	8	6	7	2	5	7	7	6	7	2	5	7	7	6	7	2	5	7	7	65.9	65.9	65.9	18.565	164	164;181;194;135;17;52;64	5.34	22	8			3			11	13	10	13	13	5
B4DWZ5;O43772;C9JPE1	B4DWZ5;O43772;C9JPE1	6;6;5	6;6;5	6;6;5	Mitochondrial carnitine/acylcarnitine carrier protein	SLC25A20	>tr|B4DWZ5|B4DWZ5_HUMAN Mitochondrial carnitine/acylcarnitine carrier protein OS=Homo sapiens GN=SLC25A20 PE=1 SV=1;>sp|O43772|MCAT_HUMAN Mitochondrial carnitine/acylcarnitine carrier protein OS=Homo sapiens GN=SLC25A20 PE=1 SV=1;>tr|C9JPE1|C9JPE1_HUMAN Mi	3	6	6	6	5	5	5	6	5	6	5	5	5	6	5	6	5	5	5	6	5	6	19.1	19.1	19.1	27.744	251	251;301;228	5.35	2	12	6		2	6		7	10	1	7	7	8
B4DX32;O60870;F5GXB3;S4R357	B4DX32;O60870;F5GXB3	4;4;3;1	4;4;3;1	4;4;3;1	DNA/RNA-binding protein KIN17	KIN	>tr|B4DX32|B4DX32_HUMAN DNA/RNA-binding protein KIN17 OS=Homo sapiens GN=KIN PE=1 SV=1;>sp|O60870|KIN17_HUMAN DNA/RNA-binding protein KIN17 OS=Homo sapiens GN=KIN PE=1 SV=2;>tr|F5GXB3|F5GXB3_HUMAN DNA/RNA-binding protein KIN17 OS=Homo sapiens GN=KIN PE=1 S	4	4	4	4	4	4	3	2	3	3	4	4	3	2	3	3	4	4	3	2	3	3	10.2	10.2	10.2	43.261	374	374;393;288;108	3.95		7	1	1	6	4					4	4	3
I3L4X7;B4DXA1;Q13227;I3L3Y9	I3L4X7;B4DXA1;Q13227;I3L3Y9	3;3;3;3	3;3;3;3	3;3;3;3	G protein pathway suppressor 2	GPS2	>tr|I3L4X7|I3L4X7_HUMAN G protein pathway suppressor 2 (Fragment) OS=Homo sapiens GN=GPS2 PE=4 SV=2;>tr|B4DXA1|B4DXA1_HUMAN G protein pathway suppressor 2 OS=Homo sapiens GN=GPS2 PE=2 SV=1;>sp|Q13227|GPS2_HUMAN G protein pathway suppressor 2 OS=Homo sapien	4	3	3	3	2	2	2	2	3	3	2	2	2	2	3	3	2	2	2	2	3	3	8.9	8.9	8.9	29.334	259	259;303;327;327	4.17	5	6	3	1	2	1			6		4	3	2
E9PNU1;B4DXC8;Q9Y5B8-2;Q9Y5B8	E9PNU1;B4DXC8;Q9Y5B8-2;Q9Y5B8	3;3;3;3	3;3;3;3	3;3;3;3	Nucleoside diphosphate kinase 7	NME7	>tr|E9PNU1|E9PNU1_HUMAN Nucleoside diphosphate kinase 7 OS=Homo sapiens GN=NME7 PE=1 SV=1;>tr|B4DXC8|B4DXC8_HUMAN Nucleoside diphosphate kinase 7 OS=Homo sapiens GN=NME7 PE=1 SV=1;>sp|Q9Y5B8-2|NDK7_HUMAN Isoform 2 of Nucleoside diphosphate kinase 7 OS=Homo	4	3	3	3	3	2	3	3	2	2	3	2	3	3	2	2	3	2	3	3	2	2	11.7	11.7	11.7	28.888	256	256;339;340;376	5.96			6		3	1	6	7			5	3	4
B4DXM1;Q96CU9-3;Q96CU9;Q96CU9-2	B4DXM1;Q96CU9-3;Q96CU9;Q96CU9-2	4;4;4;3	4;4;4;3	4;4;4;3	FAD-dependent oxidoreductase domain-containing protein 1	FOXRED1	>tr|B4DXM1|B4DXM1_HUMAN FAD-dependent oxidoreductase domain-containing protein 1 OS=Homo sapiens GN=FOXRED1 PE=1 SV=1;>sp|Q96CU9-3|FXRD1_HUMAN Isoform 3 of FAD-dependent oxidoreductase domain-containing protein 1 OS=Homo sapiens GN=FOXRED1;>sp|Q96CU9|FXRD1	4	4	4	4	3	2	2	3	2	3	3	2	2	3	2	3	3	2	2	3	2	3	11.7	11.7	11.7	35.221	316	316;472;486;275	5.62		6		1	3				1	5	3	2	2
P36897-3;B4DY26;P36897;P36897-2;F8W1R9	P36897-3;B4DY26;P36897;P36897-2;F8W1R9	2;2;2;2;1	2;2;2;2;1	2;2;2;2;1	TGF-beta receptor type-1	TGFBR1	>sp|P36897-3|TGFR1_HUMAN Isoform 3 of TGF-beta receptor type-1 OS=Homo sapiens GN=TGFBR1;>tr|B4DY26|B4DY26_HUMAN TGF-beta receptor type-1 OS=Homo sapiens GN=TGFBR1 PE=1 SV=1;>sp|P36897|TGFR1_HUMAN TGF-beta receptor type-1 OS=Homo sapiens GN=TGFBR1 PE=1 SV=	5	2	2	2	1	2	0	1	1	1	1	2	0	1	1	1	1	2	0	1	1	1	5.4	5.4	5.4	47.69	426	426;434;503;507;383	1.5	5			1							1	2
B4DY35	B4DY35	9	1	1		MTHFD2	>tr|B4DY35|B4DY35_HUMAN Bifunctional methylenetetrahydrofolate dehydrogenase/cyclohydrolase, mitochondrial OS=Homo sapiens GN=MTHFD2 PE=1 SV=1	1	9	1	1	9	8	7	8	5	8	1	0	1	1	0	1	1	0	1	1	0	1	65.6	10.8	10.8	19.933	186	186	9									4		1		1
B4DYB4;Q8NFH5;C9JIY9;C9IYQ7;F8WCF5;F8WEL4;C9JWU7;B4DP57	B4DYB4;Q8NFH5;C9JIY9;C9IYQ7;F8WCF5;F8WEL4	3;3;2;2;2;2;1;1	3;3;2;2;2;2;1;1	3;3;2;2;2;2;1;1	Nucleoporin NUP53	NUP35	>tr|B4DYB4|B4DYB4_HUMAN Nucleoporin NUP53 OS=Homo sapiens GN=NUP35 PE=1 SV=1;>sp|Q8NFH5|NUP53_HUMAN Nucleoporin NUP53 OS=Homo sapiens GN=NUP35 PE=1 SV=1;>tr|C9JIY9|C9JIY9_HUMAN Nucleoporin NUP53 (Fragment) OS=Homo sapiens GN=NUP35 PE=1 SV=1;>tr|C9IYQ7|C9IY	8	3	3	3	2	3	3	2	3	2	2	3	3	2	3	2	2	3	3	2	3	2	14.2	14.2	14.2	33.12	309	309;326;76;115;136;152;53;191	5.31			6	3			1	6			2	3	4
B4DZG6;Q9BTX1-6;Q9BTX1-5;Q9BTX1-2;Q9BTX1;Q9BTX1-4;Q9BTX1-3	B4DZG6;Q9BTX1-6;Q9BTX1-5;Q9BTX1-2;Q9BTX1;Q9BTX1-4;Q9BTX1-3	4;4;4;4;4;2;2	4;4;4;4;4;2;2	4;4;4;4;4;2;2	Nucleoporin NDC1	TMEM48	>tr|B4DZG6|B4DZG6_HUMAN Nucleoporin NDC1 OS=Homo sapiens GN=NDC1 PE=1 SV=1;>sp|Q9BTX1-6|NDC1_HUMAN Isoform 6 of Nucleoporin NDC1 OS=Homo sapiens GN=NDC1;>sp|Q9BTX1-5|NDC1_HUMAN Isoform 5 of Nucleoporin NDC1 OS=Homo sapiens GN=NDC1;>sp|Q9BTX1-2|NDC1_HUMAN I	7	4	4	4	3	4	3	3	4	4	3	4	3	3	4	4	3	4	3	3	4	4	14.5	14.5	14.5	37.928	339	339;559;634;673;674;542;557	5.11		3	7	2	2	14	6	1			4	6	5
Q9UBN7;B4DZH6;Q9UBN7-2;A6NDI8;E7EPS2;C9J172;E9PEH1;E7EP63;E7ER52;E7EUZ1;C9JEF4	Q9UBN7;B4DZH6;Q9UBN7-2	9;9;7;3;3;2;2;2;2;2;1	9;9;7;3;3;2;2;2;2;2;1	9;9;7;3;3;2;2;2;2;2;1	Histone deacetylase 6	HDAC6	>sp|Q9UBN7|HDAC6_HUMAN Histone deacetylase 6 OS=Homo sapiens GN=HDAC6 PE=1 SV=2;>tr|B4DZH6|B4DZH6_HUMAN Histone deacetylase 6 OS=Homo sapiens GN=HDAC6 PE=1 SV=1;>sp|Q9UBN7-2|HDAC6_HUMAN Isoform 2 of Histone deacetylase 6 OS=Homo sapiens GN=HDAC6	11	9	9	9	8	7	6	7	8	7	8	7	6	7	8	7	8	7	6	7	8	7	10.5	10.5	10.5	131.42	1215	1215;1229;1063;210;269;142;161;167;171;296;51	4.08	1	12	15	12	2	12	3			2	11	11	7
B4DZI8;P35606;D6R997;D6RBZ7;D6RCL6;D6RBG7;D6RBT6;H0YAC7;H0Y938	B4DZI8;P35606	32;32;6;5;5;5;5;3;3	32;32;6;5;5;5;5;3;3	32;32;6;5;5;5;5;3;3	Coatomer subunit beta	COPB2	>tr|B4DZI8|B4DZI8_HUMAN Coatomer protein complex, subunit beta 2 (Beta prime), isoform CRA_b OS=Homo sapiens GN=COPB2 PE=1 SV=1;>sp|P35606|COPB2_HUMAN Coatomer subunit beta OS=Homo sapiens GN=COPB2 PE=1 SV=2	9	32	32	32	32	32	26	29	29	28	32	32	26	29	29	28	32	32	26	29	29	28	51.4	51.4	51.4	99.045	877	877;906;152;77;86;89;111;118;177	3.98	45	75	90	81	17	23	45	21	10	6	77	77	57
B4E022;P29401;P29401-2;E9PFF2;F8W888	B4E022;P29401;P29401-2	30;30;30;11;3	30;30;30;11;3	30;30;30;11;3	Transketolase	TKT	>tr|B4E022|B4E022_HUMAN Transketolase OS=Homo sapiens GN=TKT PE=1 SV=1;>sp|P29401|TKT_HUMAN Transketolase OS=Homo sapiens GN=TKT PE=1 SV=3;>sp|P29401-2|TKT_HUMAN Isoform 2 of Transketolase OS=Homo sapiens GN=TKT	5	30	30	30	30	30	26	28	28	29	30	30	26	28	28	29	30	30	26	28	28	29	63.2	63.2	63.2	62.878	576	576;623;631;334;153	5.38	4	94	82	51	49	27	33	70	64	29	95	86	75
P11234;Q6ZS74;B4E040;C9J6B1;C9JQB3;F8WEQ6;C9JYR1	P11234;Q6ZS74;B4E040;C9J6B1;C9JQB3	9;9;9;8;6;3;3	9;9;9;8;6;3;3	7;7;7;7;5;2;2	Ras-related protein Ral-B	RALB	>sp|P11234|RALB_HUMAN Ras-related protein Ral-B OS=Homo sapiens GN=RALB PE=1 SV=1;>tr|Q6ZS74|Q6ZS74_HUMAN Ras-related protein Ral-B OS=Homo sapiens GN=RALB PE=1 SV=1;>tr|B4E040|B4E040_HUMAN Ras-related protein Ral-B OS=Homo sapiens GN=RALB PE=1 SV=1;>tr|C9	7	9	9	7	9	8	9	9	9	9	9	8	9	9	9	9	7	6	7	7	7	7	29.6	29.6	20.9	23.408	206	206;227;228;167;171;46;112	5.81	5	20	20	23	16	18	11	16	17	25	30	29	29
G3XAN4;B4E0K2;Q15629	G3XAN4;B4E0K2;Q15629	5;5;5	5;5;5	5;5;5	Translocating chain-associated membrane protein 1	TRAM1	>tr|G3XAN4|G3XAN4_HUMAN Translocating chain-associated membrane protein 1 OS=Homo sapiens GN=TRAM1 PE=1 SV=1;>tr|B4E0K2|B4E0K2_HUMAN Translocating chain-associated membrane protein 1 OS=Homo sapiens GN=TRAM1 PE=1 SV=1;>sp|Q15629|TRAM1_HUMAN Translocating c	3	5	5	5	4	5	3	4	3	5	4	5	3	4	3	5	4	5	3	4	3	5	18.1	18.1	18.1	33.435	288	288;343;374	5.84		12	6					3	10	6	7	6	5
K7ENL4;J3QL63;J3QL47;B4E0Q0;Q96ET8-3;J3KS67;Q9NYZ1;C9JYS5	K7ENL4;J3QL63;J3QL47;B4E0Q0;Q96ET8-3;J3KS67;Q9NYZ1;C9JYS5	1;1;1;1;1;1;1;1	1;1;1;1;1;1;1;1	1;1;1;1;1;1;1;1	Golgi apparatus membrane protein TVP23 homolog B	TVP23B;TVP23C	>tr|K7ENL4|K7ENL4_HUMAN Golgi apparatus membrane protein TVP23 homolog B (Fragment) OS=Homo sapiens GN=TVP23B PE=4 SV=1;>tr|J3QL63|J3QL63_HUMAN Golgi apparatus membrane protein TVP23 homolog B OS=Homo sapiens GN=TVP23B PE=4 SV=2;>tr|J3QL47|J3QL47_HUMAN Gol	8	1	1	1	1	1	1	1	1	1	1	1	1	1	1	1	1	1	1	1	1	1	9.1	9.1	9.1	15.323	132	132;141;141;185;203;203;205;205	8.33							1	4	4		1	1	2
P50542;P50542-4;B4E0T2;P50542-2;P50542-3;F5H3X7;F5H5C0;J3KPV0;F5H432;F5GXX3;F5H205;F5H637	P50542;P50542-4;B4E0T2;P50542-2;P50542-3	10;10;10;9;9;2;2;2;1;1;1;1	10;10;10;9;9;2;2;2;1;1;1;1	10;10;10;9;9;2;2;2;1;1;1;1	Peroxisomal targeting signal 1 receptor	PEX5	>sp|P50542|PEX5_HUMAN Peroxisomal targeting signal 1 receptor OS=Homo sapiens GN=PEX5 PE=1 SV=3;>sp|P50542-4|PEX5_HUMAN Isoform 4 of Peroxisomal targeting signal 1 receptor OS=Homo sapiens GN=PEX5;>tr|B4E0T2|B4E0T2_HUMAN Peroxisomal targeting signal 1 rece	12	10	10	10	8	8	7	9	7	6	8	8	7	9	7	6	8	8	7	9	7	6	19.9	19.9	19.9	70.864	639	639;654;660;602;631;248;272;410;102;104;114;168	4.04	8		10	17	4	7				3	8	9	7
Q96II8-3;B4E0T7;Q96II8;Q96II8-2;E9PD99	Q96II8-3;B4E0T7;Q96II8;Q96II8-2;E9PD99	4;4;4;4;2	3;3;3;3;2	3;3;3;3;2	Leucine-rich repeat and calponin homology domain-containing protein 3	LRCH3	>sp|Q96II8-3|LRCH3_HUMAN Isoform 3 of Leucine-rich repeat and calponin homology domain-containing protein 3 OS=Homo sapiens GN=LRCH3;>tr|B4E0T7|B4E0T7_HUMAN Leucine-rich repeat and calponin homology domain-containing protein 3 OS=Homo sapiens GN=LRCH3 PE=1	5	4	3	3	3	4	3	3	3	3	2	3	2	2	2	2	2	3	2	2	2	2	5.2	4.1	4.1	78.801	712	712;725;777;803;623	6.71					3	3	7	4			2	3	4
Q8NBY1;Q9P289;B4E0Y9;Q9P289-2;Q9P289-3	Q8NBY1;Q9P289;B4E0Y9;Q9P289-2;Q9P289-3	14;14;14;11;11	8;8;8;7;5	6;6;6;5;4	Serine/threonine-protein kinase MST4	MST4	>tr|Q8NBY1|Q8NBY1_HUMAN Serine/threonine-protein kinase MST4 OS=Homo sapiens GN=MST4 PE=2 SV=1;>sp|Q9P289|MST4_HUMAN Serine/threonine-protein kinase MST4 OS=Homo sapiens GN=MST4 PE=1 SV=2;>tr|B4E0Y9|B4E0Y9_HUMAN Serine/threonine-protein kinase MST4 OS=Homo	5	14	8	6	13	13	13	13	14	14	7	7	7	7	8	8	5	5	5	5	6	6	39.3	26.3	19.1	43.867	392	392;416;438;339;354	4.86	2	17	10	6			4	7	12		9	9	10
B4E1D7;Q9NVS9;B4E0V0;B4E152;J3QQV6	B4E1D7;Q9NVS9;B4E0V0;B4E152;J3QQV6	10;10;8;6;5	10;10;8;6;5	10;10;8;6;5	Pyridoxine-5-phosphate oxidase	PNPO	>tr|B4E1D7|B4E1D7_HUMAN Pyridoxine-5-phosphate oxidase OS=Homo sapiens GN=PNPO PE=1 SV=1;>sp|Q9NVS9|PNPO_HUMAN Pyridoxine-5-phosphate oxidase OS=Homo sapiens GN=PNPO PE=1 SV=1;>tr|B4E0V0|B4E0V0_HUMAN Pyridoxine-5-phosphate oxidase OS=Homo sapiens GN=PNP	5	10	10	10	10	8	8	10	8	10	10	8	8	10	8	10	10	8	8	10	8	10	39.1	39.1	39.1	27.822	243	243;261;166;218;120	3.82	57	25		15	24	32	14	6	2	4	33	30	25
B4E1G1;Q9BUN8-2;Q9BUN8;E5RGY0	B4E1G1;Q9BUN8-2;Q9BUN8;E5RGY0	4;4;4;3	4;4;4;3	4;4;4;3	Derlin-1	DERL1	>tr|B4E1G1|B4E1G1_HUMAN Derlin-1 OS=Homo sapiens GN=DERL1 PE=1 SV=1;>sp|Q9BUN8-2|DERL1_HUMAN Isoform 2 of Derlin-1 OS=Homo sapiens GN=DERL1;>sp|Q9BUN8|DERL1_HUMAN Derlin-1 OS=Homo sapiens GN=DERL1 PE=1 SV=1;>tr|E5RGY0|E5RGY0_HUMAN Derlin-1 OS=Homo sapiens	4	4	4	4	4	4	4	4	4	4	4	4	4	4	4	4	4	4	4	4	4	4	27.2	27.2	27.2	17.033	151	151;231;251;151	5.98			6	8	9	7	5	5	1	6	9	7	9
B4E1J0;F5H2F6;Q96AQ6-2;Q96AQ6;Q96AQ6-3	B4E1J0;F5H2F6;Q96AQ6-2;Q96AQ6;Q96AQ6-3	10;10;10;10;7	10;10;10;10;7	10;10;10;10;7	Pre-B-cell leukemia transcription factor-interacting protein 1	PBXIP1	>tr|B4E1J0|B4E1J0_HUMAN Pre-B-cell leukemia transcription factor-interacting protein 1 OS=Homo sapiens GN=PBXIP1 PE=2 SV=1;>tr|F5H2F6|F5H2F6_HUMAN Pre-B-cell leukemia transcription factor-interacting protein 1 OS=Homo sapiens GN=PBXIP1 PE=4 SV=1;>sp|Q96AQ6	5	10	10	10	8	7	9	8	9	8	8	7	9	8	9	8	8	7	9	8	9	8	19.4	19.4	19.4	62.667	558	558;576;702;731;662	4.57	7	18	6	6	6	2	11	7	5	1	11	10	13
B4E1Q4;O14730;O14730-2;J3QLP4;J3QQL5	B4E1Q4;O14730;O14730-2	4;4;3;1;1	4;4;3;1;1	4;4;3;1;1	Serine/threonine-protein kinase RIO3	RIOK3	>tr|B4E1Q4|B4E1Q4_HUMAN Serine/threonine-protein kinase RIO3 OS=Homo sapiens GN=RIOK3 PE=1 SV=1;>sp|O14730|RIOK3_HUMAN Serine/threonine-protein kinase RIO3 OS=Homo sapiens GN=RIOK3 PE=1 SV=2;>sp|O14730-2|RIOK3_HUMAN Isoform 2 of Serine/threonine-protein ki	5	4	4	4	4	4	4	4	4	4	4	4	4	4	4	4	4	4	4	4	4	4	7.8	7.8	7.8	57.474	503	503;519;516;89;135	7.31				1	6	7	7	2	16		7	6	6
B4E241;P84103	B4E241;P84103	4;4	3;3	3;3	Serine/arginine-rich splicing factor 3	SRSF3	>tr|B4E241|B4E241_HUMAN Serine/arginine-rich-splicing factor 3 OS=Homo sapiens GN=SRSF3 PE=1 SV=1;>sp|P84103|SRSF3_HUMAN Serine/arginine-rich splicing factor 3 OS=Homo sapiens GN=SRSF3 PE=1 SV=1	2	4	3	3	4	4	4	4	4	4	3	3	3	3	3	3	3	3	3	3	3	3	34.7	23.4	23.4	14.203	124	124;164	6.81			1	12	4		6	6	8	6	8	8	6
B4E2J3;O95084	B4E2J3;O95084	1;1	1;1	1;1	Serine protease 23	PRSS23	>tr|B4E2J3|B4E2J3_HUMAN Serine protease 23 OS=Homo sapiens GN=PRSS23 PE=2 SV=1;>sp|O95084|PRS23_HUMAN Serine protease 23 OS=Homo sapiens GN=PRSS23 PE=1 SV=1	2	1	1	1	1	1	1	1	1	1	1	1	1	1	1	1	1	1	1	1	1	1	3.7	3.7	3.7	39.641	351	351;383	7.86							1	6			1	1	2
B4E2M5;H3BTF0	B4E2M5;H3BTF0	2;1	2;1	2;1	Ankyrin repeat domain-containing protein 66	ANKRD66;LOC100287718	>sp|B4E2M5|ANR66_HUMAN Ankyrin repeat domain-containing protein 66 OS=Homo sapiens GN=ANKRD66 PE=2 SV=2;>tr|H3BTF0|H3BTF0_HUMAN Ankyrin repeat domain-containing protein 66 (Fragment) OS=Homo sapiens GN=ANKRD66 PE=4 SV=1	2	2	2	2	1	1	1	1	1	2	1	1	1	1	1	2	1	1	1	1	1	2	6.4	6.4	6.4	27.916	251	251;73	6.5						6	6				2	2	2
Q8WZA0;B4E2N0;K7ES95	Q8WZA0;B4E2N0;K7ES95	3;3;2	3;3;2	3;3;2	Protein LZIC	LZIC	>sp|Q8WZA0|LZIC_HUMAN Protein LZIC OS=Homo sapiens GN=LZIC PE=1 SV=1;>tr|B4E2N0|B4E2N0_HUMAN Protein LZIC OS=Homo sapiens GN=LZIC PE=1 SV=1;>tr|K7ES95|K7ES95_HUMAN Protein LZIC (Fragment) OS=Homo sapiens GN=LZIC PE=1 SV=1	3	3	3	3	3	2	3	3	3	3	3	2	3	3	3	3	3	2	3	3	3	3	17.9	17.9	17.9	21.494	190	190;211;169	6.25		6					13	9			6	4	5
C9JA28;Q9UNL2;B4E2P2	C9JA28;Q9UNL2;B4E2P2	1;1;1	1;1;1	1;1;1	Translocon-associated protein subunit gamma	SSR3	>tr|C9JA28|C9JA28_HUMAN Translocon-associated protein subunit gamma OS=Homo sapiens GN=SSR3 PE=1 SV=1;>sp|Q9UNL2|SSRG_HUMAN Translocon-associated protein subunit gamma OS=Homo sapiens GN=SSR3 PE=1 SV=1;>tr|B4E2P2|B4E2P2_HUMAN Translocon-associated protein	3	1	1	1	1	1	1	1	1	1	1	1	1	1	1	1	1	1	1	1	1	1	8	8	8	20.161	174	174;185;198	1	11										1	2	1
B4E2S7;P13473-2;P13473;P13473-3;B7Z2R9;H0YCG2	B4E2S7;P13473-2;P13473;P13473-3;B7Z2R9	5;5;5;5;4;2	5;5;5;5;4;2	5;5;5;5;4;2	Lysosome-associated membrane glycoprotein 2	LAMP2	>tr|B4E2S7|B4E2S7_HUMAN Lysosome-associated membrane glycoprotein 2 OS=Homo sapiens GN=LAMP2 PE=1 SV=1;>sp|P13473-2|LAMP2_HUMAN Isoform LAMP-2B of Lysosome-associated membrane glycoprotein 2 OS=Homo sapiens GN=LAMP2;>sp|P13473|LAMP2_HUMAN Lysosome-associat	6	5	5	5	5	4	5	5	4	5	5	4	5	5	4	5	5	4	5	5	4	5	12.4	12.4	12.4	39.811	363	363;410;410;411;300;258	7.14	4	3		5	7	8	8	18	23	8	14	12	13
K7ELV6;K7ENX8;K7EJV5;K7ELT6;K7EMY9;K7EPM4;Q14011;K7ER40;K7EQR7;B4E2X2;D6W5Y5;K7EQX4;K7ENN6;K7EIF7;K7EQL0	K7ELV6;K7ENX8;K7EJV5;K7ELT6;K7EMY9;K7EPM4;Q14011;K7ER40;K7EQR7;B4E2X2;D6W5Y5	3;3;3;3;3;3;3;3;3;3;3;1;1;1;1	3;3;3;3;3;3;3;3;3;3;3;1;1;1;1	3;3;3;3;3;3;3;3;3;3;3;1;1;1;1	Cold-inducible RNA-binding protein	CIRBP	>tr|K7ELV6|K7ELV6_HUMAN Cold-inducible RNA-binding protein (Fragment) OS=Homo sapiens GN=CIRBP PE=1 SV=1;>tr|K7ENX8|K7ENX8_HUMAN Cold-inducible RNA-binding protein OS=Homo sapiens GN=CIRBP PE=1 SV=1;>tr|K7EJV5|K7EJV5_HUMAN Cold-inducible RNA-binding protei	15	3	3	3	3	3	2	3	3	3	3	3	2	3	3	3	3	3	2	3	3	3	65.7	65.7	65.7	7.7876	70	70;89;105;135;159;168;172;173;202;263;297;32;37;60;79	5.15			4	12	2			8			5	5	4
Q8N6R0-3;B4E2X3;Q8N6R0;Q8N6R0-1;Q8N6R0-4;Q8N6R0-2	Q8N6R0-3;B4E2X3;Q8N6R0;Q8N6R0-1;Q8N6R0-4;Q8N6R0-2	16;16;16;13;13;11	16;16;16;13;13;11	16;16;16;13;13;11	Methyltransferase-like protein 13	METTL13	>sp|Q8N6R0-3|MET13_HUMAN Isoform 3 of Methyltransferase-like protein 13 OS=Homo sapiens GN=METTL13;>tr|B4E2X3|B4E2X3_HUMAN Methyltransferase-like protein 13 OS=Homo sapiens GN=METTL13 PE=1 SV=1;>sp|Q8N6R0|MET13_HUMAN Methyltransferase-like protein 13 OS=Ho	6	16	16	16	10	14	11	10	15	12	10	14	11	10	15	12	10	14	11	10	15	12	35.2	35.2	35.2	68.689	613	613;698;699;543;642;396	5.25	9	3	21	18	12	7	5	7	7	13	14	19	18
B5MC35;B5MD16;B5MCA1;Q96G28;Q96G28-2	B5MC35;B5MD16;B5MCA1;Q96G28;Q96G28-2	1;1;1;1;1	1;1;1;1;1	1;1;1;1;1	Coiled-coil domain-containing protein 104	CCDC104	>tr|B5MC35|B5MC35_HUMAN Coiled-coil domain-containing protein 104 OS=Homo sapiens GN=CCDC104 PE=1 SV=1;>tr|B5MD16|B5MD16_HUMAN Coiled-coil domain-containing protein 104 OS=Homo sapiens GN=CCDC104 PE=1 SV=1;>tr|B5MCA1|B5MCA1_HUMAN Coiled-coil domain-contain	5	1	1	1	1	1	1	1	1	1	1	1	1	1	1	1	1	1	1	1	1	1	4.6	4.6	4.6	24.971	218	218;223;313;342;367	5.13				2	9	4					2	3	2
B5MC51;P53671-3;P53671-2;P53671;F5GXC4;F5H2U0;Q96C90;E7EUC1	B5MC51;P53671-3;P53671-2;P53671	6;5;3;3;2;2;2;1	6;5;3;3;2;2;2;1	6;5;3;3;2;2;2;1	LIM domain kinase 2	LIMK2	>tr|B5MC51|B5MC51_HUMAN LIM domain kinase 2 OS=Homo sapiens GN=LIMK2 PE=1 SV=1;>sp|P53671-3|LIMK2_HUMAN Isoform 3 of LIM domain kinase 2 OS=Homo sapiens GN=LIMK2;>sp|P53671-2|LIMK2_HUMAN Isoform LIMK2b of LIM domain kinase 2 OS=Homo sapiens GN=LIMK2;>sp|P5	8	6	6	6	4	5	4	5	5	6	4	5	4	5	5	6	4	5	4	5	5	6	12.2	12.2	12.2	71.192	629	629;686;617;638;45;72;147;392	6.69		3				4	16	9			5	5	4
G5E9F5;B5MC53;B5MCF8;P39210	G5E9F5;B5MC53;B5MCF8;P39210	1;1;1;1	1;1;1;1	1;1;1;1	Protein Mpv17	MPV17	>tr|G5E9F5|G5E9F5_HUMAN MpV17 transgene, murine homolog, glomerulosclerosis, isoform CRA_d OS=Homo sapiens GN=MPV17 PE=4 SV=1;>tr|B5MC53|B5MC53_HUMAN MpV17 transgene, murine homolog, glomerulosclerosis, isoform CRA_f OS=Homo sapiens GN=MPV17 PE=4 SV=1;>tr|	4	1	1	1	1	1	0	0	1	0	1	1	0	0	1	0	1	1	0	0	1	0	20.4	20.4	20.4	12.958	113	113;170;171;176	9.67									1	2	1	1
P16422;B5MCA4;C9JKY3	P16422;B5MCA4;C9JKY3	6;6;3	6;6;3	6;6;3	Epithelial cell adhesion molecule	EPCAM	>sp|P16422|EPCAM_HUMAN Epithelial cell adhesion molecule OS=Homo sapiens GN=EPCAM PE=1 SV=2;>tr|B5MCA4|B5MCA4_HUMAN Epithelial cell adhesion molecule OS=Homo sapiens GN=EPCAM PE=1 SV=1;>tr|C9JKY3|C9JKY3_HUMAN Epithelial cell adhesion molecule (Fragment) OS	3	6	6	6	6	5	4	6	5	6	6	5	4	6	5	6	6	5	4	6	5	6	27.7	27.7	27.7	34.932	314	314;342;199	3.53	7	28	7	10				6	6		11	10	9
B5MCF9;O00541-2;O00541;B3KXD6	B5MCF9;O00541-2;O00541;B3KXD6	10;10;10;5	10;10;10;5	10;10;10;5	Pescadillo homolog	PES1	>tr|B5MCF9|B5MCF9_HUMAN Pescadillo homolog OS=Homo sapiens GN=PES1 PE=1 SV=1;>sp|O00541-2|PESC_HUMAN Isoform 2 of Pescadillo homolog OS=Homo sapiens GN=PES1;>sp|O00541|PESC_HUMAN Pescadillo homolog OS=Homo sapiens GN=PES1 PE=1 SV=1;>tr|B3KXD6|B3KXD6_HUMAN	4	10	10	10	9	9	9	10	10	9	9	9	9	10	10	9	9	9	9	10	10	9	17.9	17.9	17.9	66.077	571	571;583;588;449	6.63		11	6		10	12	32	39	6	5	20	22	19
Q6ICJ4;B5MCL2;P0CG30;P0CG29	Q6ICJ4;B5MCL2;P0CG30;P0CG29	4;4;4;4	4;4;4;4	4;4;4;4	Glutathione S-transferase theta-2B;Glutathione S-transferase theta-2	Em:AP000351.3;GSTT2;GSTT2B	>tr|Q6ICJ4|Q6ICJ4_HUMAN Em:AP000351.3 protein OS=Homo sapiens GN=Em:AP000351.3 PE=2 SV=1;>tr|B5MCL2|B5MCL2_HUMAN Glutathione S-transferase theta-2B OS=Homo sapiens GN=GSTT2 PE=4 SV=2;>sp|P0CG30|GSTT2_HUMAN Glutathione S-transferase theta-2B OS=Homo sapiens	4	4	4	4	4	4	4	4	3	4	4	4	4	4	3	4	4	4	4	4	3	4	22.2	22.2	22.2	25.948	230	230;230;244;244	4.42		2	14	6	2	10	4				8	7	6
C9JR33;C9J3U7;F8WCF4;C9JZQ0;B5MCS1;E7EWX6;Q8IXJ6-4;Q8IXJ6-2;Q8IXJ6-3;Q8IXJ6;F8WF57;F8WDM4;Q8IXJ6-5	C9JR33;C9J3U7;F8WCF4;C9JZQ0;B5MCS1;E7EWX6;Q8IXJ6-4;Q8IXJ6-2;Q8IXJ6-3;Q8IXJ6;F8WF57;F8WDM4;Q8IXJ6-5	2;2;2;2;2;2;2;2;2;2;1;1;1	2;2;2;2;2;2;2;2;2;2;1;1;1	2;2;2;2;2;2;2;2;2;2;1;1;1	NAD-dependent protein deacetylase sirtuin-2	SIRT2	>tr|C9JR33|C9JR33_HUMAN NAD-dependent protein deacetylase sirtuin-2 (Fragment) OS=Homo sapiens GN=SIRT2 PE=4 SV=1;>tr|C9J3U7|C9J3U7_HUMAN NAD-dependent protein deacetylase sirtuin-2 (Fragment) OS=Homo sapiens GN=SIRT2 PE=4 SV=1;>tr|F8WCF4|F8WCF4_HUMAN NAD-	13	2	2	2	2	2	1	1	2	2	2	2	1	1	2	2	2	2	1	1	2	2	34.2	34.2	34.2	8.2183	73	73;78;111;130;169;237;271;352;369;389;39;52;319	6.5	4								6	2	2	2	1
B5MCT7;B7Z2C3;P49593;A8MX49;C9J2F3	B5MCT7;B7Z2C3;P49593;A8MX49	3;3;3;2;1	3;3;3;2;1	3;3;3;2;1	Protein phosphatase 1F	PPM1F	>tr|B5MCT7|B5MCT7_HUMAN Protein phosphatase 1F OS=Homo sapiens GN=PPM1F PE=1 SV=1;>tr|B7Z2C3|B7Z2C3_HUMAN Protein phosphatase 1F OS=Homo sapiens GN=PPM1F PE=1 SV=1;>sp|P49593|PPM1F_HUMAN Protein phosphatase 1F OS=Homo sapiens GN=PPM1F PE=1 SV=3;>tr|A8MX49|	5	3	3	3	3	3	2	2	1	1	3	3	2	2	1	1	3	3	2	2	1	1	14.3	14.3	14.3	31.263	286	286;350;454;361;89	3.69			4	9							3	3	2
H7C128;H7C179;Q9H0E9-4;B5MCW3;H7C127;Q9H0E9-2;Q9H0E9;F8W820;F8WDX5;D6RID0;F8WCS7;F8WBH2;C9JV05;H0YAH7;Q9H0E9-3	H7C128;H7C179;Q9H0E9-4;B5MCW3;H7C127;Q9H0E9-2;Q9H0E9;F8W820	3;3;3;3;3;3;3;2;1;1;1;1;1;1;1	3;3;3;3;3;3;3;2;1;1;1;1;1;1;1	3;3;3;3;3;3;3;2;1;1;1;1;1;1;1	Bromodomain-containing protein 8	BRD8	>tr|H7C128|H7C128_HUMAN Bromodomain-containing protein 8 (Fragment) OS=Homo sapiens GN=BRD8 PE=1 SV=1;>tr|H7C179|H7C179_HUMAN Bromodomain-containing protein 8 (Fragment) OS=Homo sapiens GN=BRD8 PE=1 SV=1;>sp|Q9H0E9-4|BRD8_HUMAN Isoform 4 of Bromodomain-con	15	3	3	3	1	1	2	2	3	2	1	1	2	2	3	2	1	1	2	2	3	2	4.1	4.1	4.1	93.293	857	857;861;866;878;892;951;1235;837;39;48;67;79;122;292;757	4.64	1		4	5				4			1	1	2
B5MCX3;C9J2Q4;C9IY94;H7C2Y0;H7C310;B5MD47;C9JQJ4	B5MCX3;C9J2Q4	16;11;7;7;6;5;5	1;1;1;0;0;1;0	0;0;0;0;0;0;0		2019-09-02	>tr|B5MCX3|B5MCX3_HUMAN Septin-2 OS=Homo sapiens GN=SEPT2 PE=1 SV=1;>tr|C9J2Q4|C9J2Q4_HUMAN Septin-2 (Fragment) OS=Homo sapiens GN=SEPT2 PE=1 SV=1	7	16	1	0	16	15	15	16	15	16	1	1	1	1	1	1	0	0	0	0	0	0	62.9	2.8	0	36.94	321	321;184;121;188;161;94;147	2.4		6	4								2	2	1
F8WB76;Q6NXT1-2;B5MCX7;H7C3L3;D3YTC9;Q6NXT1	F8WB76;Q6NXT1-2;B5MCX7;H7C3L3;D3YTC9;Q6NXT1	1;1;1;1;1;1	1;1;1;1;1;1	1;1;1;1;1;1	Ankyrin repeat domain-containing protein 54	ANKRD54	>tr|F8WB76|F8WB76_HUMAN Ankyrin repeat domain-containing protein 54 (Fragment) OS=Homo sapiens GN=ANKRD54 PE=4 SV=1;>sp|Q6NXT1-2|ANR54_HUMAN Isoform 2 of Ankyrin repeat domain-containing protein 54 OS=Homo sapiens GN=ANKRD54;>tr|B5MCX7|B5MCX7_HUMAN Ankyrin	6	1	1	1	1	1	1	0	1	1	1	1	1	0	1	1	1	1	1	0	1	1	10.3	10.3	10.3	17.502	156	156;161;180;208;284;300	4.8				1	4						1	1	1
B5MDE0;Q96AA3	B5MDE0;Q96AA3	4;4	4;4	4;4	Protein RFT1 homolog	RFT1	>tr|B5MDE0|B5MDE0_HUMAN Protein RFT1 homolog OS=Homo sapiens GN=RFT1 PE=4 SV=1;>sp|Q96AA3|RFT1_HUMAN Protein RFT1 homolog OS=Homo sapiens GN=RFT1 PE=1 SV=1	2	4	4	4	4	4	4	4	4	4	4	4	4	4	4	4	4	4	4	4	4	4	6.8	6.8	6.8	55.835	502	502;541	4.82		5	11	6	6	11			6		8	8	6
P62826;B5MDF5;J3KQE5;F5H018;H0YFC6;B4DV51	P62826;B5MDF5;J3KQE5;F5H018;H0YFC6	14;14;13;12;7;6	14;14;13;12;7;6	14;14;13;12;7;6	GTP-binding nuclear protein Ran	RAN	>sp|P62826|RAN_HUMAN GTP-binding nuclear protein Ran OS=Homo sapiens GN=RAN PE=1 SV=3;>tr|B5MDF5|B5MDF5_HUMAN GTP-binding nuclear protein Ran OS=Homo sapiens GN=RAN PE=1 SV=1;>tr|J3KQE5|J3KQE5_HUMAN GTP-binding nuclear protein Ran (Fragment) OS=Homo sapien	6	14	14	14	13	14	11	13	13	14	13	14	11	13	13	14	13	14	11	13	13	14	49.1	49.1	49.1	24.423	216	216;233;234;198;103;128	6.45	3	31	17	21	14	19	20	5	48	43	40	38	31
B5MDQ0;Q2NKX8	B5MDQ0;Q2NKX8	7;7	7;7	7;7	DNA excision repair protein ERCC-6-like	ERCC6L	>tr|B5MDQ0|B5MDQ0_HUMAN DNA excision repair protein ERCC-6-like OS=Homo sapiens GN=ERCC6L PE=1 SV=1;>sp|Q2NKX8|ERC6L_HUMAN DNA excision repair protein ERCC-6-like OS=Homo sapiens GN=ERCC6L PE=1 SV=1	2	7	7	7	5	5	5	6	7	7	5	5	5	6	7	7	5	5	5	6	7	7	6.6	6.6	6.6	126.98	1127	1127;1250	4.98	6		3	11	1	8	9	2	2		5	5	8
Q9H6V9;Q9H6V9-2;B5MDU6;B5MCE2;B4DRG3;C9JHU6;D3YTH1;C9JUM0;Q9H6V9-4;B5MCU4;Q9H6V9-3	Q9H6V9;Q9H6V9-2;B5MDU6;B5MCE2;B4DRG3	3;3;3;2;2;1;1;1;1;1;1	3;3;3;2;2;1;1;1;1;1;1	3;3;3;2;2;1;1;1;1;1;1	UPF0554 protein C2orf43	C2orf43;FLJ21820	>sp|Q9H6V9|CB043_HUMAN UPF0554 protein C2orf43 OS=Homo sapiens GN=C2orf43 PE=1 SV=1;>sp|Q9H6V9-2|CB043_HUMAN Isoform 2 of UPF0554 protein C2orf43 OS=Homo sapiens GN=C2orf43;>tr|B5MDU6|B5MDU6_HUMAN UPF0554 protein C2orf43 OS=Homo sapiens GN=C2orf43 PE=1 SV=	11	3	3	3	3	2	1	2	3	3	3	2	1	2	3	3	3	2	1	2	3	3	9.8	9.8	9.8	37.318	325	325;331;370;146;166;130;156;159;195;240;277	6.38	4					3	3		1	5	3	2	1
H3BRV0;Q99613;B5ME19;H3BPE4;H3BPE3;H3BTY8	H3BRV0;Q99613;B5ME19	26;26;26;4;2;1	26;26;26;4;2;1	26;26;26;4;2;1	Eukaryotic translation initiation factor 3 subunit C	EIF3C;EIF3CL	>tr|H3BRV0|H3BRV0_HUMAN Eukaryotic translation initiation factor 3 subunit C OS=Homo sapiens GN=EIF3C PE=1 SV=1;>sp|Q99613|EIF3C_HUMAN Eukaryotic translation initiation factor 3 subunit C OS=Homo sapiens GN=EIF3C PE=1 SV=1;>sp|B5ME19|EIFCL_HUMAN Eukaryotic	6	26	26	26	26	25	22	23	24	23	26	25	22	23	24	23	26	25	22	23	24	23	31.5	31.5	31.5	104.1	903	903;913;914;148;132;79	5.16	8	56	63	33	19	19	60	46	19	12	61	58	50
Q9P0V9-3;E7EW69;Q9P0V9;E7EX04;Q9P0V9-2;B5ME97;B7Z371;B7Z277;F5GYV2;C9JEW2;C9JNR7;F5H1F2	Q9P0V9-3;E7EW69;Q9P0V9;E7EX04;Q9P0V9-2;B5ME97;B7Z371	10;10;10;10;10;10;7;4;1;1;1;1	9;9;9;9;9;9;6;3;1;1;1;1	9;9;9;9;9;9;6;3;1;1;1;1	Septin-10	2019-09-10	>sp|Q9P0V9-3|SEP10_HUMAN Isoform 3 of Septin-10 OS=Homo sapiens GN=SEPT10;>tr|E7EW69|E7EW69_HUMAN Septin-10 OS=Homo sapiens GN=SEPT10 PE=1 SV=1;>sp|Q9P0V9|SEP10_HUMAN Septin-10 OS=Homo sapiens GN=SEPT10 PE=1 SV=2;>tr|E7EX04|E7EX04_HUMAN Septin-10 OS=Homo s	12	10	9	9	9	10	10	10	10	10	8	9	9	9	9	9	8	9	9	9	9	9	31.6	27.1	27.1	50.065	431	431;450;454;473;503;544;321;283;26;57;61;98	5.74		13	11	14		8	19	13	8	5	15	15	16
H0YBP2;H0YEE5;Q5JRY3;H0YAR8;Q5JRY4;H0YBC8;Q5JRY5;P36402-10;P36402-14;P36402-16;P36402-8;P36402-6;P36402-2;Q9UJU2-3;Q9UJU2-7;Q9NQB0-17;P36402-9;D4PHA3;P36402-13;P36402-15;Q9UJU2-5;P36402-12;P36402-4;P36402-7;P36402-5;P36402;Q9UJU2-6;Q9UJU2;Q9NQB0-14;Q9NQB0-15;Q9NQB0-10;Q9NQB0-12;Q9NQB0-9;Q9NQB0-4;B7WNT5;Q9NQB0-6;Q9NQB0-11;Q9NQB0-2;P36402-11;P36402-3;Q9NQB0-13;Q9NQB0-16;Q9HCS4;Q9NQB0-8;Q9NQB0-7;Q9N…	H0YBP2;H0YEE5;Q5JRY3;H0YAR8;Q5JRY4;H0YBC8;Q5JRY5;P36402-10;P36402-14;P36402-16;P36402-8;P36402-6;P36402-2;Q9UJU2-3;Q9UJU2-7;Q9NQB0-17;P36402-9;D4PHA3;P36402-13;P36402-15;Q9UJU2-5;P36402-12;P36402-4;P36402-7;P36402-5;P36402;Q9UJU2-6;Q9UJU2;Q9NQB0-14;Q9NQB0-15;Q9NQB0-10;Q9NQB0-12;Q9NQB0-9;Q9NQB0-4;B7WNT5;Q9NQB0-6;Q9NQB0-11;Q9NQB0-2;P36402-11;P36402-3;Q9NQB0-13;Q9NQB0-16;Q9HCS4;Q9NQB0-8;Q9NQB0-7;Q9N…	1;1;1;1;1;1;1;1;1;1;1;1;1;1;1;1;1;1;1;1;1;1;1;1;1;1;1;1;1;1;1;1;1;1;1;1;1;1;1;1;1;1;1;1;1;1;1;1	1;1;1;1;1;1;1;1;1;1;1;1;1;1;1;1;1;1;1;1;1;1;1;1;1;1;1;1;1;1;1;1;1;1;1;1;1;1;1;1;1;1;1;1;1;1;1;1	1;1;1;1;1;1;1;1;1;1;1;1;1;1;1;1;1;1;1;1;1;1;1;1;1;1;1;1;1;1;1;1;1;1;1;1;1;1;1;1;1;1;1;1;1;1;1;1	Transcription factor 7;Lymphoid enhancer-binding factor 1;Transcription factor 7-like 1;Transcription factor 7-like 2	TCF7;TCF7L2;LEF1;TCF7L1	>tr|H0YBP2|H0YBP2_HUMAN Transcription factor 7 (Fragment) OS=Homo sapiens GN=TCF7 PE=4 SV=1;>tr|H0YEE5|H0YEE5_HUMAN Transcription factor 7-like 2 (Fragment) OS=Homo sapiens GN=TCF7L2 PE=4 SV=1;>tr|Q5JRY3|Q5JRY3_HUMAN Transcription factor 7-like 2 OS=Homo s	48	1	1	1	0	0	0	0	1	1	0	0	0	0	1	1	0	0	0	0	1	1	10.5	10.5	10.5	12.639	105	105;108;120;147;176;204;206;250;254;255;268;269;269;284;303;335;365;366;369;370;371;379;380;383;384;384;386;399;442;447;455;459;465;477;481;482;489;494;494;495;579;584;588;596;602;602;619;619	5					3
C9JDT9;B7Z730;C9J695;Q6ICL3-3;Q6ICL3;C9JC99;B7WNV6	C9JDT9;B7Z730;C9J695;Q6ICL3-3;Q6ICL3;C9JC99;B7WNV6	1;1;1;1;1;1;1	1;1;1;1;1;1;1	1;1;1;1;1;1;1	Transport and Golgi organization 2 homolog	TANGO2	>tr|C9JDT9|C9JDT9_HUMAN Transport and Golgi organization protein 2 homolog OS=Homo sapiens GN=TANGO2 PE=4 SV=1;>tr|B7Z730|B7Z730_HUMAN Transport and Golgi organization protein 2 homolog OS=Homo sapiens GN=TANGO2 PE=2 SV=1;>tr|C9J695|C9J695_HUMAN Transport	7	1	1	1	1	1	1	1	0	1	1	1	1	1	0	1	1	1	1	1	0	1	11.5	11.5	11.5	18.472	165	165;198;226;273;276;281;317	7							5				1	1	1
B7WP74;Q9HCG8;B7WP27	B7WP74;Q9HCG8;B7WP27	9;9;9	9;9;9	9;9;9	Pre-mRNA-splicing factor CWC22 homolog	CWC22	>tr|B7WP74|B7WP74_HUMAN Pre-mRNA-splicing factor CWC22 homolog (Fragment) OS=Homo sapiens GN=CWC22 PE=1 SV=1;>sp|Q9HCG8|CWC22_HUMAN Pre-mRNA-splicing factor CWC22 homolog OS=Homo sapiens GN=CWC22 PE=1 SV=3;>tr|B7WP27|B7WP27_HUMAN Pre-mRNA-splicing factor C	3	9	9	9	7	7	5	5	7	6	7	7	5	5	7	6	7	7	5	5	7	6	13	13	13	85.576	745	745;908;908	4.15	3	14	13	6	2	6	1		1	6	10	9	9
B7WPD1	B7WPD1	2	2	1			>tr|B7WPD1|B7WPD1_HUMAN Uncharacterized protein OS=Homo sapiens PE=4 SV=1	1	2	2	1	2	2	2	2	2	2	2	2	2	2	2	2	1	1	1	1	1	1	3.9	3.9	2.1	59.713	533	533	5.8				3	6	4	6	1			3	4	4
Q32P44;B7WPE2;H0Y3M3;Q32P44-2;G3V195;G3V1D0;C9J6V3;E9PJV5;E9PSB4;H7C355;Q32P44-3	Q32P44;B7WPE2;H0Y3M3;Q32P44-2;G3V195;G3V1D0	5;5;4;4;3;3;1;1;1;1;1	5;5;4;4;3;3;1;1;1;1;1	5;5;4;4;3;3;1;1;1;1;1	Echinoderm microtubule-associated protein-like 3	EML3	>sp|Q32P44|EMAL3_HUMAN Echinoderm microtubule-associated protein-like 3 OS=Homo sapiens GN=EML3 PE=1 SV=1;>tr|B7WPE2|B7WPE2_HUMAN Echinoderm microtubule associated protein like 3, isoform CRA_e OS=Homo sapiens GN=EML3 PE=1 SV=1;>tr|H0Y3M3|H0Y3M3_HUMAN Echi	11	5	5	5	3	4	3	3	3	2	3	4	3	3	3	2	3	4	3	3	3	2	7	7	7	95.196	896	896;897;911;917;679;889;113;127;128;137;194	4.45		5	1		8	6					3	5	4
B7WPF4;Q9UPU5	B7WPF4;Q9UPU5	30;30	30;30	30;30	Ubiquitin carboxyl-terminal hydrolase;Ubiquitin carboxyl-terminal hydrolase 24	USP24	>tr|B7WPF4|B7WPF4_HUMAN Ubiquitin carboxyl-terminal hydrolase OS=Homo sapiens GN=USP24 PE=1 SV=2;>sp|Q9UPU5|UBP24_HUMAN Ubiquitin carboxyl-terminal hydrolase 24 OS=Homo sapiens GN=USP24 PE=1 SV=3	2	30	30	30	20	23	26	24	23	25	20	23	26	24	23	25	20	23	26	24	23	25	14.5	14.5	14.5	277.41	2460	2460;2620	6	6	24	15	24	17	5	20	38	20	20	27	30	34
Q8WVV9-5;B7WPG3;Q8WVV9-4;Q8WVV9;D6W592;H7C464;Q8WVV9-3;Q8WVV9-2;C9IYN3;C9JJZ7;H7BXH8	Q8WVV9-5;B7WPG3;Q8WVV9-4;Q8WVV9;D6W592	15;15;15;15;15;6;4;4;4;3;3	14;14;14;14;14;5;4;4;4;3;3	14;14;14;14;14;5;4;4;4;3;3	Heterogeneous nuclear ribonucleoprotein L-like	HNRPLL	>sp|Q8WVV9-5|HNRLL_HUMAN Isoform 5 of Heterogeneous nuclear ribonucleoprotein L-like OS=Homo sapiens GN=HNRNPLL;>tr|B7WPG3|B7WPG3_HUMAN Uncharacterized protein OS=Homo sapiens GN=HNRPLL PE=1 SV=1;>sp|Q8WVV9-4|HNRLL_HUMAN Isoform 4 of Heterogeneous nuclear	11	15	14	14	15	15	13	13	15	14	14	14	12	12	14	13	14	14	12	12	14	13	37.8	36.4	36.4	56.466	508	508;508;537;542;542;133;275;282;282;149;217	4.34	6	39	30	21	23	31	25	7			33	33	30
B7Z1C4;P40123;B7Z385;E9PDI2;B7Z214;F8WEW0;F8WDB9	B7Z1C4;P40123;B7Z385;E9PDI2	8;8;7;7;3;2;2	7;7;6;6;2;2;2	7;7;6;6;2;2;2	Adenylyl cyclase-associated protein;Adenylyl cyclase-associated protein 2	CAP2	>tr|B7Z1C4|B7Z1C4_HUMAN Adenylyl cyclase-associated protein OS=Homo sapiens GN=CAP2 PE=1 SV=1;>sp|P40123|CAP2_HUMAN Adenylyl cyclase-associated protein 2 OS=Homo sapiens GN=CAP2 PE=1 SV=1;>tr|B7Z385|B7Z385_HUMAN Adenylyl cyclase-associated protein OS=Homo	7	8	7	7	5	5	6	5	6	5	4	4	5	4	5	4	4	4	5	4	5	4	24.2	22.3	22.3	45.245	413	413;477;365;451;217;104;194	4.44	3	5	5	6	1	6	6	2			6	5	7
H0YE25;H0YF25;B7Z1J9;Q8NB37;Q8NB37-2;E9PLI5;H0YER3;E9PQD8;Q8NB37-3	H0YE25;H0YF25;B7Z1J9;Q8NB37;Q8NB37-2;E9PLI5	3;3;3;3;3;2;1;1;1	3;3;3;3;3;2;1;1;1	3;3;3;3;3;2;1;1;1	Parkinson disease 7 domain-containing protein 1	PDDC1	>tr|H0YE25|H0YE25_HUMAN Parkinson disease 7 domain-containing protein 1 (Fragment) OS=Homo sapiens GN=PDDC1 PE=1 SV=1;>tr|H0YF25|H0YF25_HUMAN Parkinson disease 7 domain-containing protein 1 (Fragment) OS=Homo sapiens GN=PDDC1 PE=1 SV=1;>tr|B7Z1J9|B7Z1J9_HU	9	3	3	3	2	2	2	2	3	2	2	2	2	2	3	2	2	2	2	2	3	2	30.6	30.6	30.6	15.439	144	144;162;170;220;250;186;87;120;184	6.53					1	10	6	1	1		4	2	2
B7Z1R5;P38606;C9JVW8;C9JA17	B7Z1R5;P38606	23;23;7;6	23;23;7;6	23;23;7;6	V-type proton ATPase catalytic subunit A	ATP6V1A	>tr|B7Z1R5|B7Z1R5_HUMAN V-type proton ATPase catalytic subunit A OS=Homo sapiens GN=ATP6V1A PE=1 SV=1;>sp|P38606|VATA_HUMAN V-type proton ATPase catalytic subunit A OS=Homo sapiens GN=ATP6V1A PE=1 SV=2	4	23	23	23	22	23	20	22	23	21	22	23	20	22	23	21	22	23	20	22	23	21	50.7	50.7	50.7	64.735	584	584;617;221;184	5.58	7	44	30	40	18	24	25	34	21	32	45	42	44
B7Z242;P27338;B7Z5H3;P21397-2;P21397	B7Z242;P27338;B7Z5H3	10;10;9;1;1	10;10;9;1;1	10;10;9;1;1	Amine oxidase [flavin-containing] B	MAOB	>tr|B7Z242|B7Z242_HUMAN Amine oxidase [flavin-containing] B OS=Homo sapiens GN=MAOB PE=2 SV=1;>sp|P27338|AOFB_HUMAN Amine oxidase [flavin-containing] B OS=Homo sapiens GN=MAOB PE=1 SV=3;>tr|B7Z5H3|B7Z5H3_HUMAN Amine oxidase [flavin-containing] B OS=Homo sa	5	10	10	10	7	9	10	8	9	8	7	9	10	8	9	8	7	9	10	8	9	8	24.2	24.2	24.2	57.258	504	504;520;411;394;527	4.72		19	7	8	18	8	11	9			10	16	16
B7Z266;B7Z6M6;O43511	B7Z266;B7Z6M6;O43511	1;1;1	1;1;1	1;1;1	Pendrin	SLC26A4	>tr|B7Z266|B7Z266_HUMAN Pendrin OS=Homo sapiens GN=SLC26A4 PE=2 SV=1;>tr|B7Z6M6|B7Z6M6_HUMAN Pendrin OS=Homo sapiens GN=SLC26A4 PE=2 SV=1;>sp|O43511|S26A4_HUMAN Pendrin OS=Homo sapiens GN=SLC26A4 PE=1 SV=1	3	1	1	1	1	1	1	1	1	1	1	1	1	1	1	1	1	1	1	1	1	1	3.4	3.4	3.4	39.266	349	349;367;780	9									7		1	2	1
J3KP22;P18433-4;P18433-2;P18433-3;P18433;B7Z2A4;Q5JWG0	J3KP22;P18433-4;P18433-2;P18433-3;P18433;B7Z2A4	12;12;12;12;12;12;1	12;12;12;12;12;12;1	10;10;10;10;10;10;1	Receptor-type tyrosine-protein phosphatase alpha	PTPRA	>tr|J3KP22|J3KP22_HUMAN Receptor-type tyrosine-protein phosphatase OS=Homo sapiens GN=PTPRA PE=1 SV=1;>sp|P18433-4|PTPRA_HUMAN Isoform 4 of Receptor-type tyrosine-protein phosphatase alpha OS=Homo sapiens GN=PTPRA;>sp|P18433-2|PTPRA_HUMAN Isoform 2 of Rece	7	12	12	10	11	9	8	10	10	11	11	9	8	10	10	11	9	7	6	8	8	9	22.6	22.6	20.1	75.886	658	658;793;793;802;802;813;253	6.05		14	9		4	24	24	8	8	7	18	16	15
B7Z2A7;Q5T8D3-4;Q5T8D3-2;Q5T8D3-3;Q5T8D3;X6RDD7;Q5T8E0	B7Z2A7;Q5T8D3-4;Q5T8D3-2;Q5T8D3-3;Q5T8D3;X6RDD7;Q5T8E0	6;6;6;6;6;4;4	6;6;6;6;6;4;4	6;6;6;6;6;4;4	Acyl-CoA-binding domain-containing protein 5	ACBD5	>tr|B7Z2A7|B7Z2A7_HUMAN Acyl-CoA-binding domain-containing protein 5 OS=Homo sapiens GN=ACBD5 PE=1 SV=1;>sp|Q5T8D3-4|ACBD5_HUMAN Isoform 4 of Acyl-CoA-binding domain-containing protein 5 OS=Homo sapiens GN=ACBD5;>sp|Q5T8D3-2|ACBD5_HUMAN Isoform 2 of Acyl-C	7	6	6	6	5	5	4	6	4	5	5	5	4	6	4	5	5	5	4	6	4	5	22.7	22.7	22.7	38.771	348	348;416;490;525;534;251;294	4.32	5	6	3	7	8	5				4	6	5	6
B7Z2C8;Q969H0-4;Q969H0-3;Q969H0-2;Q969H0	B7Z2C8;Q969H0-4;Q969H0-3;Q969H0-2;Q969H0	2;2;2;2;2	2;2;2;2;2	2;2;2;2;2	F-box/WD repeat-containing protein 7	FBXW7	>tr|B7Z2C8|B7Z2C8_HUMAN F-box/WD repeat-containing protein 7 OS=Homo sapiens GN=FBXW7 PE=2 SV=1;>sp|Q969H0-4|FBXW7_HUMAN Isoform 4 of F-box/WD repeat-containing protein 7 OS=Homo sapiens GN=FBXW7;>sp|Q969H0-3|FBXW7_HUMAN Isoform 3 of F-box/WD repeat-contai	5	2	2	2	2	2	2	1	2	2	2	2	2	1	2	2	2	2	2	1	2	2	4.1	4.1	4.1	59.723	531	531;589;621;627;707	6.71		5							6	3	3	3	2
B7Z2L7;Q6ZVM7;B7Z2U2;Q6ZVM7-2;Q6ZVM7-3;K7ENB0;Q6ZVM7-4;F5H3S6	B7Z2L7;Q6ZVM7;B7Z2U2;Q6ZVM7-2;Q6ZVM7-3	5;5;3;3;3;2;1;1	5;5;3;3;3;2;1;1	5;5;3;3;3;2;1;1	TOM1-like protein 2	TOM1L2	>tr|B7Z2L7|B7Z2L7_HUMAN TOM1-like protein 2 OS=Homo sapiens GN=TOM1L2 PE=1 SV=1;>sp|Q6ZVM7|TM1L2_HUMAN TOM1-like protein 2 OS=Homo sapiens GN=TOM1L2 PE=1 SV=1;>tr|B7Z2U2|B7Z2U2_HUMAN TOM1-like protein 2 OS=Homo sapiens GN=TOM1L2 PE=2 SV=1;>sp|Q6ZVM7-2|TM1L	8	5	5	5	3	4	5	4	4	4	3	4	5	4	4	4	3	4	5	4	4	4	13.3	13.3	13.3	53.368	483	483;507;389;457;462;83;240;388	5.74		2	9	4		2	6	1	1	6	4	5	6
B7Z2S5;Q16881-4;Q16881-3;Q16881;E7ESI6;B2R5P6;Q16881-5;E2QRB9;Q16881-2;E9PNQ6;E7EW10;Q16881-6;E9PIR7;Q16881-7;E9PKD3;E9PIZ5;E9PLT3;E9PKI4;E9PQI3;E9PRI8	B7Z2S5;Q16881-4;Q16881-3;Q16881;E7ESI6;B2R5P6;Q16881-5;E2QRB9;Q16881-2;E9PNQ6;E7EW10;Q16881-6;E9PIR7;Q16881-7	29;29;29;29;28;27;27;27;27;27;27;27;26;24;12;6;4;4;3;2	29;29;29;29;28;27;27;27;27;27;27;27;26;24;12;6;4;4;3;2	28;28;28;28;27;26;26;26;26;26;26;26;25;23;11;5;3;3;3;2	Thioredoxin reductase 1, cytoplasmic	TXNRD1	>tr|B7Z2S5|B7Z2S5_HUMAN Thioredoxin reductase 1, cytoplasmic OS=Homo sapiens GN=TXNRD1 PE=1 SV=1;>sp|Q16881-4|TRXR1_HUMAN Isoform 4 of Thioredoxin reductase 1, cytoplasmic OS=Homo sapiens GN=TXNRD1;>sp|Q16881-3|TRXR1_HUMAN Isoform 3 of Thioredoxin reductas	20	29	29	28	27	28	20	22	18	23	27	28	20	22	18	23	26	27	19	21	17	22	67.3	67.3	64.5	60.021	547	547;551;598;649;581;497;499;541;543;568;612;614;482;461;175;139;70;72;53;44	6.93	19	17	16	12	24	33	42	19	76	62	68	60	48
B7Z2Y2;Q14746-2;Q14746;F5H1E5;B7Z7N2;V9GY21;REV__Q6SZW1-2;REV__Q6SZW1	B7Z2Y2;Q14746-2;Q14746;F5H1E5;B7Z7N2	13;13;13;12;9;1;1;1	13;13;13;12;9;1;1;1	13;13;13;12;9;1;1;1	Conserved oligomeric Golgi complex subunit 2	COG2	>tr|B7Z2Y2|B7Z2Y2_HUMAN Conserved oligomeric Golgi complex subunit 2 OS=Homo sapiens GN=COG2 PE=1 SV=1;>sp|Q14746-2|COG2_HUMAN Isoform 2 of Conserved oligomeric Golgi complex subunit 2 OS=Homo sapiens GN=COG2;>sp|Q14746|COG2_HUMAN Conserved oligomeric Golg	8	13	13	13	12	13	12	11	9	11	12	13	12	11	9	11	12	13	12	11	9	11	24.9	24.9	24.9	76.078	679	679;737;738;622;427;124;690;724	7.06		2	5	13	5	6	4	16	25	8	14	17	14
C9J2P0;H7C061;P51965-2;B7Z306;R4GND1;R4GN80;P51965-3;P51965;Q96LR5;Q969T4	C9J2P0;H7C061;P51965-2;B7Z306;R4GND1;R4GN80;P51965-3;P51965;Q96LR5;Q969T4	1;1;1;1;1;1;1;1;1;1	1;1;1;1;1;1;1;1;1;1	1;1;1;1;1;1;1;1;1;1	Ubiquitin-conjugating enzyme E2 E1;Ubiquitin-conjugating enzyme E2 E2;Ubiquitin-conjugating enzyme E2 E3	UBE2E1;UBE2E2;UBE2E3	>tr|C9J2P0|C9J2P0_HUMAN Ubiquitin-conjugating enzyme E2 E1 (Fragment) OS=Homo sapiens GN=UBE2E1 PE=1 SV=1;>tr|H7C061|H7C061_HUMAN Ubiquitin-conjugating enzyme E2 E1 (Fragment) OS=Homo sapiens GN=UBE2E1 PE=1 SV=1;>sp|P51965-2|UB2E1_HUMAN Isoform 2 of Ubiqui	10	1	1	1	1	1	1	1	1	1	1	1	1	1	1	1	1	1	1	1	1	1	7.5	7.5	7.5	16.21	147	147;151;160;167;174;175;176;193;201;207	4.47				9	8						3	3	3
B7Z3I9;P13716;P13716-2;B7ZBK6	B7Z3I9;P13716;P13716-2	6;6;6;2	6;6;6;2	6;6;6;2	Delta-aminolevulinic acid dehydratase	ALAD	>tr|B7Z3I9|B7Z3I9_HUMAN Delta-aminolevulinic acid dehydratase OS=Homo sapiens GN=ALAD PE=1 SV=1;>sp|P13716|HEM2_HUMAN Delta-aminolevulinic acid dehydratase OS=Homo sapiens GN=ALAD PE=1 SV=1;>sp|P13716-2|HEM2_HUMAN Isoform 2 of Delta-aminolevulinic acid deh	4	6	6	6	3	3	5	4	5	4	3	3	5	4	5	4	3	3	5	4	5	4	20.8	20.8	20.8	34.52	313	313;330;359;120	7.24					2	14	7	6	3	5	3	4	6
B7Z3K1;D3DVS1	B7Z3K1;D3DVS1	1;1	1;1	1;1		TMEM128	>tr|B7Z3K1|B7Z3K1_HUMAN Transmembrane protein 128 OS=Homo sapiens GN=TMEM128 PE=2 SV=1;>tr|D3DVS1|D3DVS1_HUMAN Transmembrane protein 128 OS=Homo sapiens GN=TMEM128 PE=4 SV=1	2	1	1	1	1	1	1	1	1	1	1	1	1	1	1	1	1	1	1	1	1	1	9.8	9.8	9.8	14.946	132	132;165	4.71				2	5						1	1	1
B7Z3Y2;B7Z9P8;C9K055;C9JM55;C9JGT6	B7Z3Y2;B7Z9P8;C9K055	16;16;8;6;5	1;1;1;1;1	1;1;1;1;1		PCYOX1	>tr|B7Z3Y2|B7Z3Y2_HUMAN Prenylcysteine oxidase 1 OS=Homo sapiens GN=PCYOX1 PE=1 SV=1;>tr|B7Z9P8|B7Z9P8_HUMAN Prenylcysteine oxidase 1 OS=Homo sapiens GN=PCYOX1 PE=1 SV=1;>tr|C9K055|C9K055_HUMAN Prenylcysteine oxidase 1 (Fragment) OS=Homo sapiens GN=PCYOX1	5	16	1	1	15	16	13	14	15	15	0	1	1	1	1	1	0	1	1	1	1	1	48.9	5.2	5.2	48.375	427	427;428;209;154;129	6.33						4	2					1	1
B7Z491;Q13496;B7Z499;F5H1N3;C9J2A2	B7Z491;Q13496;B7Z499;F5H1N3	4;4;3;2;1	3;3;2;1;1	3;3;2;1;1	Myotubularin	MTM1	>tr|B7Z491|B7Z491_HUMAN Myotubularin OS=Homo sapiens GN=MTM1 PE=1 SV=1;>sp|Q13496|MTM1_HUMAN Myotubularin OS=Homo sapiens GN=MTM1 PE=1 SV=2;>tr|B7Z499|B7Z499_HUMAN Myotubularin OS=Homo sapiens GN=MTM1 PE=1 SV=1;>tr|F5H1N3|F5H1N3_HUMAN Myotubularin OS=Homo	5	4	3	3	3	4	4	4	3	3	2	3	3	3	2	2	2	3	3	3	2	2	6.7	5.1	5.1	66.053	566	566;603;488;416;103	6.19				3	5	6	3		4		3	5	4
Q96M96;B7Z493;E9PJX4;F8VWL3;Q96M96-3;E9PQT1;E9PNX0;F8W1R0;Q96M96-2;G3XA97	Q96M96;B7Z493;E9PJX4;F8VWL3;Q96M96-3;E9PQT1;E9PNX0;F8W1R0	4;4;4;4;3;3;3;2;1;1	4;4;4;4;3;3;3;2;1;1	4;4;4;4;3;3;3;2;1;1	FYVE, RhoGEF and PH domain-containing protein 4	FGD4	>sp|Q96M96|FGD4_HUMAN FYVE, RhoGEF and PH domain-containing protein 4 OS=Homo sapiens GN=FGD4 PE=1 SV=2;>tr|B7Z493|B7Z493_HUMAN FYVE, RhoGEF and PH domain-containing protein 4 OS=Homo sapiens GN=FGD4 PE=2 SV=1;>tr|E9PJX4|E9PJX4_HUMAN FYVE, RhoGEF and PH do	10	4	4	4	3	2	3	2	3	2	3	2	3	2	3	2	3	2	3	2	3	2	5.2	5.2	5.2	86.625	766	766;851;878;903;188;207;235;673;280;471	6.48		2		1	5	4		7	4		5	3	5
Q9BUJ2-4;B7Z4B8;Q9BUJ2-2;Q9BUJ2;Q9BUJ2-3;M0R3F1;M0QYZ0;M0R203;M0QZV6;M0R0K8;M0QYI8;M0QYM5	Q9BUJ2-4;B7Z4B8;Q9BUJ2-2;Q9BUJ2;Q9BUJ2-3;M0R3F1;M0QYZ0	18;18;18;18;17;15;10;3;3;3;2;1	18;18;18;18;17;15;10;3;3;3;2;1	18;18;18;18;17;15;10;3;3;3;2;1	Heterogeneous nuclear ribonucleoprotein U-like protein 1	HNRNPUL1	>sp|Q9BUJ2-4|HNRL1_HUMAN Isoform 4 of Heterogeneous nuclear ribonucleoprotein U-like protein 1 OS=Homo sapiens GN=HNRNPUL1;>tr|B7Z4B8|B7Z4B8_HUMAN Heterogeneous nuclear ribonucleoprotein U-like protein 1 OS=Homo sapiens GN=HNRNPUL1 PE=1 SV=1;>sp|Q9BUJ2-2|H	12	18	18	18	15	15	16	15	15	17	15	15	16	15	15	17	15	15	16	15	15	17	28	28	28	84.793	756	756;767;804;856;752;641;371;81;118;158;172;90	5.7	3	48	7	16	22	40	16	19	34	15	37	40	37
H7C2W9;C9JU56;B7Z4E3;P62899-3;P62899;P62899-2;B7Z4C8;B8ZZK4	H7C2W9;C9JU56;B7Z4E3;P62899-3;P62899;P62899-2;B7Z4C8;B8ZZK4	4;4;4;4;4;4;4;3	4;4;4;4;4;4;4;3	4;4;4;4;4;4;4;3	60S ribosomal protein L31	RPL31	>tr|H7C2W9|H7C2W9_HUMAN 60S ribosomal protein L31 (Fragment) OS=Homo sapiens GN=RPL31 PE=1 SV=1;>tr|C9JU56|C9JU56_HUMAN 60S ribosomal protein L31 (Fragment) OS=Homo sapiens GN=RPL31 PE=1 SV=1;>tr|B7Z4E3|B7Z4E3_HUMAN 60S ribosomal protein L31 OS=Homo sapien	8	4	4	4	4	4	4	4	4	4	4	4	4	4	4	4	4	4	4	4	4	4	35.2	35.2	35.2	12.701	108	108;115;120;121;125;128;130;79	6.07		12			6	6	5	4		11	8	8	5
B7Z4V9;Q9BT40-2;Q9BT40;C9JZB0;F5GXZ0	B7Z4V9;Q9BT40-2;Q9BT40;C9JZB0;F5GXZ0	2;2;2;1;1	2;2;2;1;1	2;2;2;1;1	Inositol polyphosphate 5-phosphatase K	INPP5K	>tr|B7Z4V9|B7Z4V9_HUMAN Inositol polyphosphate 5-phosphatase K OS=Homo sapiens GN=INPP5K PE=2 SV=1;>sp|Q9BT40-2|INP5K_HUMAN Isoform 2 of Inositol polyphosphate 5-phosphatase K OS=Homo sapiens GN=INPP5K;>sp|Q9BT40|INP5K_HUMAN Inositol polyphosphate 5-phosph	5	2	2	2	2	2	2	2	2	2	2	2	2	2	2	2	2	2	2	2	2	2	5.6	5.6	5.6	40.973	356	356;372;448;229;352	7.26					2	11	3			7	4	5	4
B7Z588;O14763-2;O14763	B7Z588;O14763-2;O14763	3;3;3	3;3;3	3;3;3	Tumor necrosis factor receptor superfamily member 10B	TNFRSF10B	>tr|B7Z588|B7Z588_HUMAN Tumor necrosis factor receptor superfamily member 10B OS=Homo sapiens GN=TNFRSF10B PE=2 SV=1;>sp|O14763-2|TR10B_HUMAN Isoform Short of Tumor necrosis factor receptor superfamily member 10B OS=Homo sapiens GN=TNFRSF10B;>sp|O14763|TR1	3	3	3	3	2	2	2	2	2	1	2	2	2	2	2	1	2	2	2	2	2	1	13.8	13.8	13.8	28.674	260	260;411;440	5.8		1		1	3	4	6				3	3	3
Q5XLC2;Q64EX5;B7Z5C3;Q66S35;Q16877;Q4VBA9;C9K0D8;C9JX77	Q5XLC2;Q64EX5;B7Z5C3;Q66S35;Q16877;Q4VBA9;C9K0D8	6;6;6;6;6;3;3;1	3;3;3;3;3;0;3;1	3;3;3;3;3;0;3;1	6-phosphofructo-2-kinase/fructose-2,6-bisphosphatase 4;6-phosphofructo-2-kinase;Fructose-2,6-bisphosphatase	PFKFB4;PFKFB1	>tr|Q5XLC2|Q5XLC2_HUMAN 6-phosphofructo-2-kinase/fructose-2, 6-biphosphatase 4 splice isoform 5 OS=Homo sapiens GN=PFKFB4 PE=2 SV=1;>tr|Q64EX5|Q64EX5_HUMAN 6-phosphofructo-2-kinase/fructose-2, 6-biphosphatase 4 splice isoform 3 OS=Homo sapiens GN=PFKFB4 PE	8	6	3	3	4	4	4	5	6	6	2	2	1	2	3	3	2	2	1	2	3	3	16.1	9.9	9.9	49.707	434	434;435;458;462;469;271;318;175	4.61			3	10	3	7					4	4	3
B7Z5R1;P31749;G3V3K5;G3V3X1;G3V2I6	B7Z5R1;P31749	6;6;2;2;2	5;5;2;2;2	5;5;2;2;2	RAC-alpha serine/threonine-protein kinase	AKT1	>tr|B7Z5R1|B7Z5R1_HUMAN RAC-alpha serine/threonine-protein kinase OS=Homo sapiens GN=AKT1 PE=1 SV=1;>sp|P31749|AKT1_HUMAN RAC-alpha serine/threonine-protein kinase OS=Homo sapiens GN=AKT1 PE=1 SV=2	5	6	5	5	5	5	6	6	6	6	4	4	5	5	5	5	4	4	5	5	5	5	17.7	15.8	15.8	48.346	418	418;480;105;162;167	6.31		1	3	4	9		3	4	3	5	4	4	7
P62070;B7Z5Z2;E9PK85;P62070-3;P62070-2	P62070;B7Z5Z2;E9PK85;P62070-3	3;3;2;2;1	1;1;1;1;1	1;1;1;1;1	Ras-related protein R-Ras2	RRAS2	>sp|P62070|RRAS2_HUMAN Ras-related protein R-Ras2 OS=Homo sapiens GN=RRAS2 PE=1 SV=1;>tr|B7Z5Z2|B7Z5Z2_HUMAN Ras-related protein R-Ras2 OS=Homo sapiens GN=RRAS2 PE=1 SV=1;>tr|E9PK85|E9PK85_HUMAN Ras-related protein R-Ras2 (Fragment) OS=Homo sapiens GN=RRAS	5	3	1	1	3	3	3	3	3	3	1	1	1	1	1	1	1	1	1	1	1	1	19.1	5.9	5.9	23.399	204	204;210;166;169;127	5.19				3	16	8					4	4	6
B7Z6B8;Q16698;E5RJG7;E5RFV2;E5RJD2;E5RID6;H0YAW3	B7Z6B8;Q16698;E5RJG7;E5RFV2;E5RJD2	12;12;8;8;6;4;1	12;12;8;8;6;4;1	12;12;8;8;6;4;1	2,4-dienoyl-CoA reductase, mitochondrial	DECR1	>tr|B7Z6B8|B7Z6B8_HUMAN 2,4-dienoyl-CoA reductase, mitochondrial OS=Homo sapiens GN=DECR1 PE=1 SV=1;>sp|Q16698|DECR_HUMAN 2,4-dienoyl-CoA reductase, mitochondrial OS=Homo sapiens GN=DECR1 PE=1 SV=1;>tr|E5RJG7|E5RJG7_HUMAN 2,4-dienoyl-CoA reductase, mitocho	7	12	12	12	11	12	11	12	12	12	11	12	11	12	12	12	11	12	11	12	12	12	47.5	47.5	47.5	34.994	326	326;335;181;205;151;95;43	6.03	6	36	5	6		6	5	15	26	23	18	23	21
F8W1R7;P60660-2;P60660;J3KND3;G8JLA2;G3V1V0;B7Z6Z4;F8VPF3;G3V1Y7;F8VZU9;F8W180;H0YI43;F8W1I5;F8VXL3	F8W1R7;P60660-2;P60660;J3KND3;G8JLA2;G3V1V0;B7Z6Z4;F8VPF3;G3V1Y7;F8VZU9;F8W180	7;7;7;7;7;7;7;6;5;4;4;2;2;1	7;7;7;7;7;7;7;6;5;4;4;2;2;1	5;5;5;5;5;5;5;4;5;4;4;2;0;1	Myosin light polypeptide 6	MYL6	>tr|F8W1R7|F8W1R7_HUMAN Myosin light polypeptide 6 OS=Homo sapiens GN=MYL6 PE=1 SV=1;>sp|P60660-2|MYL6_HUMAN Isoform Smooth muscle of Myosin light polypeptide 6 OS=Homo sapiens GN=MYL6;>sp|P60660|MYL6_HUMAN Myosin light polypeptide 6 OS=Homo sapiens GN=MYL	14	7	7	5	7	7	6	7	7	7	7	7	6	7	7	7	5	5	4	5	5	5	49.7	49.7	33.1	16.29	145	145;151;151;152;152;161;238;130;115;103;196;83;175;47	4.78	18	11	15	22	18	9			3	22	23	20	15
F5H4C2;B7Z7F3;Q9H6Z4-3;Q9H6Z4-2;Q9H6Z4;K7EIJ4;K7EN31;K7ESQ0;K7EJV3;K7EMH9	F5H4C2;B7Z7F3;Q9H6Z4-3;Q9H6Z4-2;Q9H6Z4	9;9;9;9;9;4;3;2;2;1	9;9;9;9;9;4;3;2;2;1	9;9;9;9;9;4;3;2;2;1	Ran-binding protein 3	RANBP3	>tr|F5H4C2|F5H4C2_HUMAN Ran-binding protein 3 OS=Homo sapiens GN=RANBP3 PE=1 SV=1;>tr|B7Z7F3|B7Z7F3_HUMAN Ran-binding protein 3 OS=Homo sapiens GN=RANBP3 PE=1 SV=1;>sp|Q9H6Z4-3|RANB3_HUMAN Isoform 3 of Ran-binding protein 3 OS=Homo sapiens GN=RANBP3;>sp|Q9	10	9	9	9	9	9	7	7	9	9	9	9	7	7	9	9	9	9	7	7	9	9	22.1	22.1	22.1	46.949	439	439;494;499;562;567;155;171;122;174;51	6.28	5	4	1	12	17	8	19	14	7	11	17	17	13
B7Z7G5;O95900	B7Z7G5;O95900	4;4	4;4	4;4	Probable tRNA pseudouridine synthase 2	TRUB2	>tr|B7Z7G5|B7Z7G5_HUMAN Probable tRNA pseudouridine synthase 2 OS=Homo sapiens GN=TRUB2 PE=1 SV=1;>sp|O95900|TRUB2_HUMAN Probable tRNA pseudouridine synthase 2 OS=Homo sapiens GN=TRUB2 PE=1 SV=1	2	4	4	4	3	3	3	4	3	3	3	3	3	4	3	3	3	3	3	4	3	3	16	16	16	30.454	275	275;331	8.63	1						6	1	8	11	4	3	5
B7Z817;Q15392;F5H0H1;H7C4B7	B7Z817;Q15392;F5H0H1	13;13;8;6	13;13;8;6	13;13;8;6	Delta(24)-sterol reductase	DHCR24	>tr|B7Z817|B7Z817_HUMAN Delta(24)-sterol reductase OS=Homo sapiens GN=DHCR24 PE=1 SV=1;>sp|Q15392|DHC24_HUMAN Delta(24)-sterol reductase OS=Homo sapiens GN=DHCR24 PE=1 SV=2;>tr|F5H0H1|F5H0H1_HUMAN Delta(24)-sterol reductase OS=Homo sapiens GN=DHCR24 PE=1 S	4	13	13	13	13	11	11	10	10	11	13	11	11	10	10	11	13	11	11	10	10	11	28.8	28.8	28.8	54.75	475	475;516;300;154	5.26	1	31	15	14	11	20	38	8		12	25	26	25
F8W118;F8VV59;B7Z9C2;H0YHC3;B3KV44;F8VRJ2;H0YH88;F8W543	F8W118;F8VV59;B7Z9C2;H0YHC3;B3KV44;F8VRJ2;H0YH88;F8W543	8;8;8;7;7;6;6;6	8;8;8;7;7;6;6;6	1;1;1;0;1;1;0;0		NAP1L1	>tr|F8W118|F8W118_HUMAN Nucleosome assembly protein 1-like 1 (Fragment) OS=Homo sapiens GN=NAP1L1 PE=1 SV=1;>tr|F8VV59|F8VV59_HUMAN Nucleosome assembly protein 1-like 1 OS=Homo sapiens GN=NAP1L1 PE=1 SV=1;>tr|B7Z9C2|B7Z9C2_HUMAN Nucleosome assembly protein	8	8	8	1	8	8	7	8	8	8	8	8	7	8	8	8	1	1	1	1	1	1	39.7	39.7	6.7	24.694	209	209;327;349;198;323;114;177;328	6.31	11	17	1	15	10	1	3	24	29	17	22	21	19
I3L3T4;I3L367;I3NI44;Q8N749;B7Z9E2;J3KQU4;I3L4I4;O75674;I3L4G0;I3L1G1;B4DUW5;I3L1Q1;I3L4N3	I3L3T4;I3L367;I3NI44;Q8N749;B7Z9E2;J3KQU4;I3L4I4;O75674;I3L4G0;I3L1G1;B4DUW5;I3L1Q1;I3L4N3	4;4;4;4;4;4;4;4;3;3;3;2;2	4;4;4;4;4;4;4;4;3;3;3;2;2	4;4;4;4;4;4;4;4;3;3;3;2;2	TOM1-like protein 1	TOM1L1	>tr|I3L3T4|I3L3T4_HUMAN TOM1-like protein 1 OS=Homo sapiens GN=TOM1L1 PE=4 SV=1;>tr|I3L367|I3L367_HUMAN TOM1-like protein 1 (Fragment) OS=Homo sapiens GN=TOM1L1 PE=4 SV=1;>tr|I3NI44|I3NI44_HUMAN TOM1-like protein 1 OS=Homo sapiens GN=TOM1L1 PE=1 SV=1;>tr|Q	13	4	4	4	3	2	2	2	3	2	3	2	2	2	3	2	3	2	2	2	3	2	17.8	17.8	17.8	25.253	225	225;229;326;346;399;465;469;476;199;252;364;106;122	4.11		7	4	2	7	7					6	6	5
B7Z9G5;Q5VW32;F5GXQ0;Q5VW33	B7Z9G5;Q5VW32;F5GXQ0	7;7;6;3	7;7;6;3	7;7;6;3	BRO1 domain-containing protein BROX	C1orf58;BROX	>tr|B7Z9G5|B7Z9G5_HUMAN BRO1 domain-containing protein BROX OS=Homo sapiens GN=BROX PE=1 SV=1;>sp|Q5VW32|BROX_HUMAN BRO1 domain-containing protein BROX OS=Homo sapiens GN=BROX PE=1 SV=1;>tr|F5GXQ0|F5GXQ0_HUMAN BRO1 domain-containing protein BROX OS=Homo sa	4	7	7	7	7	6	4	5	7	7	7	6	4	5	7	7	7	6	4	5	7	7	23.2	23.2	23.2	42.871	379	379;411;338;215	6.17		8	10					11	5	8	8	7	6
B7Z9I1;P11310;P11310-2;Q5T4U5;B4DJE7;H0YDT5;E9PJM9	B7Z9I1;P11310;P11310-2;Q5T4U5;B4DJE7	11;10;10;10;9;2;1	11;10;10;10;9;2;1	11;10;10;10;9;2;1	Medium-chain specific acyl-CoA dehydrogenase, mitochondrial	ACADM	>tr|B7Z9I1|B7Z9I1_HUMAN Medium-chain-specific acyl-CoA dehydrogenase, mitochondrial OS=Homo sapiens GN=ACADM PE=1 SV=1;>sp|P11310|ACADM_HUMAN Medium-chain specific acyl-CoA dehydrogenase, mitochondrial OS=Homo sapiens GN=ACADM PE=1 SV=1;>sp|P11310-2|ACADM_	7	11	11	11	11	11	10	10	9	10	11	11	10	10	9	10	11	11	10	10	9	10	33.8	33.8	33.8	42.426	385	385;421;425;454;232;67;104	5.27		25	22	9	18	6	4	10	9	16	23	22	19
B7Z9I3;O75787;H0Y750;B7Z1I9;H7C240;B7Z413;H7C3E1	B7Z9I3;O75787;H0Y750;B7Z1I9;H7C240;B7Z413	6;6;5;5;4;3;2	6;6;5;5;4;3;2	6;6;5;5;4;3;2	Renin receptor	ATP6AP2	>tr|B7Z9I3|B7Z9I3_HUMAN Renin receptor OS=Homo sapiens GN=ATP6AP2 PE=1 SV=1;>sp|O75787|RENR_HUMAN Renin receptor OS=Homo sapiens GN=ATP6AP2 PE=1 SV=2;>tr|H0Y750|H0Y750_HUMAN Renin receptor (Fragment) OS=Homo sapiens GN=ATP6AP2 PE=4 SV=1;>tr|B7Z1I9|B7Z1I9_H	7	6	6	6	5	5	5	6	6	6	5	5	5	6	6	6	5	5	5	6	6	6	27	27	27	35.612	318	318;350;243;272;203;274;259	5.73		6	10	5	6	5	1	4	13	2	10	9	7
B7ZAB3;G3V150;O94766;E9PNA1	B7ZAB3;G3V150;O94766;E9PNA1	4;4;4;2	4;4;4;2	4;4;4;2	Galactosylgalactosylxylosylprotein 3-beta-glucuronosyltransferase 3	B3GAT3	>tr|B7ZAB3|B7ZAB3_HUMAN Galactosylgalactosylxylosylprotein 3-beta-glucuronosyltransferase 3 OS=Homo sapiens GN=B3GAT3 PE=1 SV=1;>tr|G3V150|G3V150_HUMAN Beta-1,3-glucuronyltransferase 3 (Glucuronosyltransferase I), isoform CRA_a OS=Homo sapiens GN=B3GAT3 PE	4	4	4	4	3	3	4	4	2	2	3	3	4	4	2	2	3	3	4	4	2	2	14	14	14	34.624	315	315;319;335;223	7.27			2	1		2	11	3	4	3	5	4	6
B7ZAM9;Q9UBQ5;K7ES31;K7EMQ9;K7EQM4;B4DQ48;K7EK53	B7ZAM9;Q9UBQ5;K7ES31;K7EMQ9;K7EQM4	9;9;6;6;6;3;3	9;9;6;6;6;3;3	3;3;0;0;3;3;3	Eukaryotic translation initiation factor 3 subunit K	EIF3K	>tr|B7ZAM9|B7ZAM9_HUMAN Eukaryotic translation initiation factor 3 subunit K OS=Homo sapiens GN=EIF3K PE=1 SV=1;>sp|Q9UBQ5|EIF3K_HUMAN Eukaryotic translation initiation factor 3 subunit K OS=Homo sapiens GN=EIF3K PE=1 SV=1;>tr|K7ES31|K7ES31_HUMAN Eukaryoti	7	9	9	3	9	9	7	7	9	8	9	9	7	7	9	8	3	3	2	2	3	2	53.1	53.1	15.2	24.484	211	211;218;137;140;170;124;131	5.72	10	24	12	7			8	20	20	14	20	19	16
B7ZAQ6-2;B7ZAQ6-3;P0CG08;B7ZAQ6;U3KPV2;E9PKY3;A6NKF9;V9GY17;H0YFP4	B7ZAQ6-2;B7ZAQ6-3;P0CG08;B7ZAQ6;U3KPV2;E9PKY3;A6NKF9;V9GY17;H0YFP4	4;4;4;4;3;3;3;2;2	4;4;4;4;3;3;3;2;2	4;4;4;4;3;3;3;2;2	Golgi pH regulator B;Golgi pH regulator A;Putative Golgi pH regulator C	GPR89B;GPR89A;GPR89C	>sp|B7ZAQ6-2|GPHRA_HUMAN Isoform 2 of Golgi pH regulator A OS=Homo sapiens GN=GPR89A;>sp|B7ZAQ6-3|GPHRA_HUMAN Isoform 3 of Golgi pH regulator A OS=Homo sapiens GN=GPR89A;>sp|P0CG08|GPHRB_HUMAN Golgi pH regulator B OS=Homo sapiens GN=GPR89B PE=1 SV=1;>sp|B7	9	4	4	4	4	4	4	3	4	4	4	4	4	3	4	4	4	4	4	3	4	4	14.3	14.3	14.3	38.484	335	335;430;455;455;216;229;320;109;122	6.24		6		6	6	2	2		15	1	7	7	8
B7ZBC9;B7ZBC8;O75449-2;O75449	B7ZBC9;B7ZBC8;O75449-2;O75449	2;2;2;2	2;2;2;2	2;2;2;2	Katanin p60 ATPase-containing subunit A1	KATNA1	>tr|B7ZBC9|B7ZBC9_HUMAN Katanin p60 ATPase-containing subunit A1 (Fragment) OS=Homo sapiens GN=KATNA1 PE=1 SV=1;>tr|B7ZBC8|B7ZBC8_HUMAN Katanin p60 ATPase-containing subunit A1 (Fragment) OS=Homo sapiens GN=KATNA1 PE=1 SV=1;>sp|O75449-2|KTNA1_HUMAN Isoform	4	2	2	2	1	1	1	2	2	2	1	1	1	2	2	2	1	1	1	2	2	2	10	10	10	24.322	211	211;280;311;491	4.24			6	6	2	1	2				2	2	3
Q9NR46;B7ZC38;B7ZC39;Q9NR46-2;F8WFB9;G5E9J1	Q9NR46;B7ZC38;B7ZC39;Q9NR46-2	10;10;9;9;3;1	10;10;9;9;3;1	10;10;9;9;3;1	Endophilin-B2	SH3GLB2	>sp|Q9NR46|SHLB2_HUMAN Endophilin-B2 OS=Homo sapiens GN=SH3GLB2 PE=1 SV=1;>tr|B7ZC38|B7ZC38_HUMAN Endophilin-B2 OS=Homo sapiens GN=SH3GLB2 PE=1 SV=1;>tr|B7ZC39|B7ZC39_HUMAN Endophilin-B2 OS=Homo sapiens GN=SH3GLB2 PE=1 SV=1;>sp|Q9NR46-2|SHLB2_HUMAN Isoform	6	10	10	10	9	8	8	9	9	9	9	8	8	9	9	9	9	8	8	9	9	9	28.6	28.6	28.6	43.973	395	395;400;374;404;127;24	5.75		13	25			1	7	7	18	8	12	13	13
E7EN44;B7ZKL7;Q86WA8;H3BQ67;H3BUW8	E7EN44;B7ZKL7;Q86WA8;H3BQ67;H3BUW8	2;2;2;1;1	2;2;2;1;1	2;2;2;1;1	Lon protease homolog 2, peroxisomal	LONP2	>tr|E7EN44|E7EN44_HUMAN Lon protease homolog 2, peroxisomal OS=Homo sapiens GN=LONP2 PE=1 SV=1;>tr|B7ZKL7|B7ZKL7_HUMAN Lon protease homolog 2, peroxisomal OS=Homo sapiens GN=LONP2 PE=1 SV=1;>sp|Q86WA8|LONP2_HUMAN Lon protease homolog 2, peroxisomal OS=Homo	5	2	2	2	2	1	2	1	2	1	2	1	2	1	2	1	2	1	2	1	2	1	5.6	5.6	5.6	68.054	605	605;808;852;169;300	5.78			2	4						3	2	1	2
Q8WTV0-4;B7ZKQ9;Q8WTV0-2;Q8WTV0-5;B3KW46;B4DZ71;Q8WTV0;Q8WTV0-3;F5H4X0;F5H5E8	Q8WTV0-4;B7ZKQ9;Q8WTV0-2;Q8WTV0-5;B3KW46;B4DZ71;Q8WTV0;Q8WTV0-3;F5H4X0	11;11;11;10;10;10;10;9;9;2	11;11;11;10;10;10;10;9;9;2	11;11;11;10;10;10;10;9;9;2	Scavenger receptor class B member 1	SCARB1	>sp|Q8WTV0-4|SCRB1_HUMAN Isoform 4 of Scavenger receptor class B member 1 OS=Homo sapiens GN=SCARB1;>tr|B7ZKQ9|B7ZKQ9_HUMAN SCARB1 protein OS=Homo sapiens GN=SCARB1 PE=1 SV=1;>sp|Q8WTV0-2|SCRB1_HUMAN Isoform 1 of Scavenger receptor class B member 1 OS=Homo	10	11	11	11	9	10	9	9	10	11	9	10	9	9	10	11	9	10	9	9	10	11	23	23	23	53.579	474	474;481;509;506;512;516;552;409;499;146	5.95		8	13	7	17	10			14	14	13	13	11
E7ERB7;B7ZLZ0;Q9P107;K7EJC2	E7ERB7;B7ZLZ0;Q9P107;K7EJC2	2;2;2;1	2;2;2;1	2;2;2;1	GEM-interacting protein	GMIP	>tr|E7ERB7|E7ERB7_HUMAN GEM-interacting protein OS=Homo sapiens GN=GMIP PE=1 SV=1;>tr|B7ZLZ0|B7ZLZ0_HUMAN GEM-interacting protein OS=Homo sapiens GN=GMIP PE=1 SV=1;>sp|Q9P107|GMIP_HUMAN GEM-interacting protein OS=Homo sapiens GN=GMIP PE=1 SV=2;>tr|K7EJC2|K	4	2	2	2	1	1	0	2	2	1	1	1	0	2	2	1	1	1	0	2	2	1	3.3	3.3	3.3	103.7	941	941;944;970;303	8.57					1	1			1	4	1	1
B7ZLZ2;Q9BZQ6;H0Y498	B7ZLZ2;Q9BZQ6	4;4;1	4;4;1	4;4;1	ER degradation-enhancing alpha-mannosidase-like protein 3	EDEM3	>tr|B7ZLZ2|B7ZLZ2_HUMAN ER degradation-enhancing alpha-mannosidase-like protein 3 OS=Homo sapiens GN=EDEM3 PE=2 SV=1;>sp|Q9BZQ6|EDEM3_HUMAN ER degradation-enhancing alpha-mannosidase-like protein 3 OS=Homo sapiens GN=EDEM3 PE=1 SV=2	3	4	4	4	3	4	3	3	3	3	3	4	3	3	3	3	3	4	3	3	3	3	5.1	5.1	5.1	102	905	905;932;380	6.33		1	5		5	4	1		1	7	4	5	3
B7ZM01;P19113	B7ZM01;P19113	1;1	1;1	1;1	Histidine decarboxylase	HDC	>tr|B7ZM01|B7ZM01_HUMAN HDC protein OS=Homo sapiens GN=HDC PE=2 SV=1;>sp|P19113|DCHS_HUMAN Histidine decarboxylase OS=Homo sapiens GN=HDC PE=1 SV=2	2	1	1	1	1	1	1	1	1	1	1	1	1	1	1	1	1	1	1	1	1	1	2.1	2.1	2.1	70.058	629	629;662	3		2	6	2							2	2	2
B8ZZ47;H0Y714;Q96G21;B9A008;E7ENR5;F8WCN0	B8ZZ47;H0Y714;Q96G21;B9A008;E7ENR5	3;3;3;2;2;1	3;3;3;2;2;1	3;3;3;2;2;1	U3 small nucleolar ribonucleoprotein protein IMP4	IMP4	>tr|B8ZZ47|B8ZZ47_HUMAN U3 small nucleolar ribonucleoprotein protein IMP4 OS=Homo sapiens GN=IMP4 PE=4 SV=1;>tr|H0Y714|H0Y714_HUMAN U3 small nucleolar ribonucleoprotein protein IMP4 (Fragment) OS=Homo sapiens GN=IMP4 PE=4 SV=1;>sp|Q96G21|IMP4_HUMAN U3 smal	6	3	3	3	3	2	2	3	2	2	3	2	2	3	2	2	3	2	2	3	2	2	11.7	11.7	11.7	28.568	248	248;280;291;172;236;76	5.89		2			2	7	8				3	3	4
C9JEL3;B9A044;O60573-2;B8ZZ50;O60573;B4E1E4;B9A023;B8ZZL3	C9JEL3;B9A044;O60573-2;B8ZZ50;O60573	5;5;5;5;5;2;2;2	5;5;5;5;5;2;2;2	5;5;5;5;5;2;2;2	Eukaryotic translation initiation factor 4E type 2	EIF4E2	>tr|C9JEL3|C9JEL3_HUMAN Eukaryotic translation initiation factor 4E type 2 (Fragment) OS=Homo sapiens GN=EIF4E2 PE=1 SV=1;>tr|B9A044|B9A044_HUMAN Eukaryotic translation initiation factor 4E type 2 OS=Homo sapiens GN=EIF4E2 PE=1 SV=1;>sp|O60573-2|IF4E2_HUMA	8	5	5	5	3	3	4	4	5	4	3	3	4	4	5	4	3	3	4	4	5	4	24.9	24.9	24.9	24.602	213	213;233;234;236;245;188;189;200	5.65	6	2				1	4	4	6		3	3	4
H7C173;Q6NZ67;B8ZZ87;H7BZ50;H7C202;Q6P582	H7C173;Q6NZ67;B8ZZ87;H7BZ50;H7C202;Q6P582	3;3;3;2;2;2	3;3;3;2;2;2	3;3;3;2;2;2	Mitotic-spindle organizing protein 2B;Mitotic-spindle organizing protein 2A	MZT2B;MZT2A	>tr|H7C173|H7C173_HUMAN Mitotic-spindle organizing protein 2B (Fragment) OS=Homo sapiens GN=MZT2B PE=1 SV=1;>sp|Q6NZ67|MZT2B_HUMAN Mitotic-spindle organizing protein 2B OS=Homo sapiens GN=MZT2B PE=1 SV=1;>tr|B8ZZ87|B8ZZ87_HUMAN Mitotic-spindle organizing p	6	3	3	3	2	2	2	3	3	3	2	2	2	3	3	3	2	2	2	3	3	3	27.9	27.9	27.9	12.395	122	122;158;218;121;140;158	8.19					3	2			6	5	2	2	2
Q8WVK2;B8ZZ98	Q8WVK2;B8ZZ98	1;1	1;1	1;1	U4/U6.U5 small nuclear ribonucleoprotein 27 kDa protein	SNRNP27	>sp|Q8WVK2|SNR27_HUMAN U4/U6.U5 small nuclear ribonucleoprotein 27 kDa protein OS=Homo sapiens GN=SNRNP27 PE=1 SV=1;>tr|B8ZZ98|B8ZZ98_HUMAN U4/U6.U5 small nuclear ribonucleoprotein 27 kDa protein OS=Homo sapiens GN=SNRNP27 PE=1 SV=1	2	1	1	1	1	0	0	1	1	1	1	0	0	1	1	1	1	0	0	1	1	1	7.1	7.1	7.1	18.86	155	155;158	8								4			1
B8ZZA8;B8ZZC5	B8ZZA8;B8ZZC5	6;3	1;0	0;0		GLS	>tr|B8ZZA8|B8ZZA8_HUMAN Glutaminase kidney isoform, mitochondrial OS=Homo sapiens GN=GLS PE=1 SV=1;>tr|B8ZZC5|B8ZZC5_HUMAN Glutaminase kidney isoform, mitochondrial OS=Homo sapiens GN=GLS PE=1 SV=1	2	6	1	0	5	6	4	4	5	5	0	1	0	0	1	1	0	0	0	0	0	0	62.7	9.5	0	18.634	169	169;103	4.75				1	3							1
B8ZZE3;Q9NRN9;B8ZZC8;B8ZZY8;H7C0M7;F5H4E8;E7EMN2	B8ZZE3;Q9NRN9;B8ZZC8;B8ZZY8;H7C0M7	4;4;4;3;2;1;1	4;4;4;3;2;1;1	4;4;4;3;2;1;1	Methyltransferase-like protein 5	METTL5	>tr|B8ZZE3|B8ZZE3_HUMAN Methyltransferase like 5, isoform CRA_b OS=Homo sapiens GN=METTL5 PE=1 SV=1;>sp|Q9NRN9|METL5_HUMAN Methyltransferase-like protein 5 OS=Homo sapiens GN=METTL5 PE=1 SV=1;>tr|B8ZZC8|B8ZZC8_HUMAN Methyltransferase-like protein 5 OS=Homo	7	4	4	4	3	4	4	3	3	4	3	4	4	3	3	4	3	4	4	3	3	4	17.7	17.7	17.7	22.384	198	198;209;244;110;126;48;164	3.14		6	14	8	1						6	6	6
Q86VP1-3;Q86VP1-4;Q86VP1-2;Q86VP1;B8ZZD4;H7C3L5	Q86VP1-3;Q86VP1-4;Q86VP1-2;Q86VP1;B8ZZD4	6;6;6;6;6;1	6;6;6;6;6;1	6;6;6;6;6;1	Tax1-binding protein 1	TAX1BP1	>sp|Q86VP1-3|TAXB1_HUMAN Isoform 3 of Tax1-binding protein 1 OS=Homo sapiens GN=TAX1BP1;>sp|Q86VP1-4|TAXB1_HUMAN Isoform 4 of Tax1-binding protein 1 OS=Homo sapiens GN=TAX1BP1;>sp|Q86VP1-2|TAXB1_HUMAN Isoform 2 of Tax1-binding protein 1 OS=Homo sapiens GN=	6	6	6	6	4	6	4	6	6	5	4	6	4	6	6	5	4	6	4	6	6	5	10.8	10.8	10.8	65.111	563	563;590;747;789;813;326	2.73	6	10	9	12							5	9	4
B8ZZF8;Q9Y4Y9	B8ZZF8;Q9Y4Y9	1;1	1;1	1;1	U6 snRNA-associated Sm-like protein LSm5	LSM5	>tr|B8ZZF8|B8ZZF8_HUMAN U6 snRNA-associated Sm-like protein LSm5 OS=Homo sapiens GN=LSM5 PE=1 SV=1;>sp|Q9Y4Y9|LSM5_HUMAN U6 snRNA-associated Sm-like protein LSm5 OS=Homo sapiens GN=LSM5 PE=1 SV=3	2	1	1	1	1	1	0	1	1	0	1	1	0	1	1	0	1	1	0	1	1	0	29.7	29.7	29.7	7.0202	64	64;91	6.73						4	6	1			3	3
P63165;B8ZZN6;B8ZZ67;P63165-2;B8ZZJ0;B9A032	P63165;B8ZZN6;B8ZZ67;P63165-2	3;3;2;2;1;1	3;3;2;2;1;1	3;3;2;2;1;1	Small ubiquitin-related modifier 1	SUMO1	>sp|P63165|SUMO1_HUMAN Small ubiquitin-related modifier 1 OS=Homo sapiens GN=SUMO1 PE=1 SV=1;>tr|B8ZZN6|B8ZZN6_HUMAN Small ubiquitin-related modifier 1 OS=Homo sapiens GN=SUMO1 PE=1 SV=1;>tr|B8ZZ67|B8ZZ67_HUMAN SMT3 suppressor of mif two 3 homolog 1 (Yeast	6	3	3	3	3	3	3	3	3	3	3	3	3	3	3	3	3	3	3	3	3	3	27.7	27.7	27.7	11.557	101	101;146;62;76;58;77	4.39		12	12	19	9	2	6	5	1	1	11	12	10
B8ZZQ6;P06454-2;P06454	B8ZZQ6;P06454-2;P06454	1;1;1	1;1;1	1;1;1	Prothymosin alpha;Thymosin alpha-1	PTMA	>tr|B8ZZQ6|B8ZZQ6_HUMAN Uncharacterized protein OS=Homo sapiens GN=PTMA PE=1 SV=1;>sp|P06454-2|PTMA_HUMAN Isoform 2 of Prothymosin alpha OS=Homo sapiens GN=PTMA;>sp|P06454|PTMA_HUMAN Prothymosin alpha OS=Homo sapiens GN=PTMA PE=1 SV=2	3	1	1	1	1	1	1	1	1	1	1	1	1	1	1	1	1	1	1	1	1	1	15.9	15.9	15.9	11.758	107	107;110;111	1	6										1	1	1
H7BXT7;E9PHY4;Q9NYM9;B8ZZS0	H7BXT7;E9PHY4;Q9NYM9;B8ZZS0	1;1;1;1	1;1;1;1	1;1;1;1	BET1-like protein	BET1L	>tr|H7BXT7|H7BXT7_HUMAN BET1-like protein OS=Homo sapiens GN=BET1L PE=1 SV=1;>tr|E9PHY4|E9PHY4_HUMAN BET1-like protein OS=Homo sapiens GN=BET1L PE=1 SV=1;>sp|Q9NYM9|BET1L_HUMAN BET1-like protein OS=Homo sapiens GN=BET1L PE=1 SV=1;>tr|B8ZZS0|B8ZZS0_HUMAN BE	4	1	1	1	1	1	1	1	1	0	1	1	1	1	1	0	1	1	1	1	1	0	22.4	22.4	22.4	6.4651	58	58;92;111;152	1	5										1	1	1
Q8WV83-2;B8ZZV6;B8ZZY4;Q8WV83	Q8WV83-2;B8ZZV6;B8ZZY4;Q8WV83	2;2;2;2	2;2;2;2	2;2;2;2	Solute carrier family 35 member F5	SLC35F5	>sp|Q8WV83-2|S35F5_HUMAN Isoform 2 of Solute carrier family 35 member F5 OS=Homo sapiens GN=SLC35F5;>tr|B8ZZV6|B8ZZV6_HUMAN Solute carrier family 35 member F5 OS=Homo sapiens GN=SLC35F5 PE=4 SV=1;>tr|B8ZZY4|B8ZZY4_HUMAN Solute carrier family 35 member F5 O	4	2	2	2	2	2	2	2	2	2	2	2	2	2	2	2	2	2	2	2	2	2	10.7	10.7	10.7	27.826	244	244;248;517;523	4.78	4	6				2	6	5			3	3	4
Q8NBF6-2;B8ZZW5;Q8NBF6;Q8N6Z3	Q8NBF6-2;B8ZZW5;Q8NBF6	9;9;9;4	9;9;9;4	2;2;2;0	Late secretory pathway protein AVL9 homolog	AVL9	>sp|Q8NBF6-2|AVL9_HUMAN Isoform 2 of Late secretory pathway protein AVL9 homolog OS=Homo sapiens GN=AVL9;>tr|B8ZZW5|B8ZZW5_HUMAN Late secretory pathway protein AVL9 homolog OS=Homo sapiens GN=AVL9 PE=1 SV=1;>sp|Q8NBF6|AVL9_HUMAN Late secretory pathway prot	4	9	9	2	7	7	6	6	8	6	7	7	6	6	8	6	2	2	2	2	2	2	15.1	15.1	4.1	65.313	591	591;630;648;463	6.53			1	5	17	15	19	7		9	12	15	11
Q658P3-4;B8ZZX6;Q658P3-3;Q658P3;Q658P3-2	Q658P3-4;B8ZZX6;Q658P3-3;Q658P3;Q658P3-2	1;1;1;1;1	1;1;1;1;1	1;1;1;1;1	Metalloreductase STEAP3	STEAP3	>sp|Q658P3-4|STEA3_HUMAN Isoform 4 of Metalloreductase STEAP3 OS=Homo sapiens GN=STEAP3;>tr|B8ZZX6|B8ZZX6_HUMAN Metalloreductase STEAP3 OS=Homo sapiens GN=STEAP3 PE=4 SV=1;>sp|Q658P3-3|STEA3_HUMAN Isoform 3 of Metalloreductase STEAP3 OS=Homo sapiens GN=STE	5	1	1	1	1	1	1	1	1	1	1	1	1	1	1	1	1	1	1	1	1	1	2.4	2.4	2.4	50.499	456	456;457;487;488;498	5.78				1	1	6	1				2	1	2
Q96PC3-3;B8ZZZ1;Q96PC3-4;Q96PC3;Q96PC3-2;F8W8K9;G5E966	Q96PC3-3;B8ZZZ1;Q96PC3-4;Q96PC3;Q96PC3-2;F8W8K9;G5E966	5;5;5;5;5;4;4	5;5;5;5;5;4;4	4;4;4;4;4;4;4	AP-1 complex subunit sigma-3	AP1S3	>sp|Q96PC3-3|AP1S3_HUMAN Isoform 3 of AP-1 complex subunit sigma-3 OS=Homo sapiens GN=AP1S3;>tr|B8ZZZ1|B8ZZZ1_HUMAN AP-1 complex subunit sigma-3 OS=Homo sapiens GN=AP1S3 PE=4 SV=1;>sp|Q96PC3-4|AP1S3_HUMAN Isoform 4 of AP-1 complex subunit sigma-3 OS=Homo s	7	5	5	4	4	4	4	4	5	3	4	4	4	4	5	3	3	3	3	3	4	2	41.3	41.3	34.6	12.655	104	104;137;154;154;164;63;81	6.41		6	5			5	4	9	7	3	7	8	6
B9A049;Q9H977;C9J016	B9A049;Q9H977;C9J016	2;2;1	2;2;1	2;2;1	WD repeat-containing protein 54	WDR54	>tr|B9A049|B9A049_HUMAN WD repeat-containing protein 54 OS=Homo sapiens GN=WDR54 PE=4 SV=1;>sp|Q9H977|WDR54_HUMAN WD repeat-containing protein 54 OS=Homo sapiens GN=WDR54 PE=1 SV=1;>tr|C9J016|C9J016_HUMAN WD repeat-containing protein 54 (Fragment) OS=Homo	3	2	2	2	2	1	2	1	2	1	2	1	2	1	2	1	2	1	2	1	2	1	9	9	9	26.249	244	244;334;162	4.12			3	8	5						4	2	3
B9ZVN9;O95602	B9ZVN9;O95602	15;15	15;15	15;15	DNA-directed RNA polymerase;DNA-directed RNA polymerase I subunit RPA1	POLR1A	>tr|B9ZVN9|B9ZVN9_HUMAN DNA-directed RNA polymerase OS=Homo sapiens GN=POLR1A PE=1 SV=1;>sp|O95602|RPA1_HUMAN DNA-directed RNA polymerase I subunit RPA1 OS=Homo sapiens GN=POLR1A PE=1 SV=2	2	15	15	15	10	12	12	10	11	9	10	12	12	10	11	9	10	12	12	10	11	9	10.6	10.6	10.6	187.81	1659	1659;1720	5.32		12	8	12	7	9		9	5	6	11	14	13
E7ERW8;O60610-2;B9ZVX0;E9PHQ0;O60610-3;E7ET75;E9PEZ3;O60610;H9KV28;E7EMV0;B4E2I7;E5RJ79	E7ERW8;O60610-2;B9ZVX0;E9PHQ0;O60610-3;E7ET75;E9PEZ3;O60610;H9KV28;E7EMV0	43;43;43;43;43;43;43;43;43;25;3;2	43;43;43;43;43;43;43;43;43;25;3;2	43;43;43;43;43;43;43;43;43;25;3;2	Protein diaphanous homolog 1	DIAPH1	>tr|E7ERW8|E7ERW8_HUMAN Protein diaphanous homolog 1 OS=Homo sapiens GN=DIAPH1 PE=1 SV=1;>sp|O60610-2|DIAP1_HUMAN Isoform 2 of Protein diaphanous homolog 1 OS=Homo sapiens GN=DIAPH1;>tr|B9ZVX0|B9ZVX0_HUMAN Diaphanous homolog 1 (Drosophila), isoform CRA_a O	12	43	43	43	40	41	35	40	37	38	40	41	35	40	37	38	40	41	35	40	37	38	42.2	42.2	42.2	135.35	1215	1215;1248;1248;1260;1263;1264;1269;1272;1273;863;201;112	5.55	73	66	41	55	50	33	49	114	82	30	106	111	98
B9ZVX7;P09488-2;Q03013-2;Q03013;P09488;H3BQT3;Q03013-3;E7EWW9	B9ZVX7;P09488-2;Q03013-2;Q03013;P09488;H3BQT3;Q03013-3;E7EWW9	3;3;3;3;3;2;2;2	1;1;1;1;1;1;1;1	0;0;0;0;0;0;0;0	Glutathione S-transferase Mu 4;Glutathione S-transferase Mu 1	GSTM1;GSTM4	>tr|B9ZVX7|B9ZVX7_HUMAN Glutathione S-transferase Mu 1 OS=Homo sapiens GN=GSTM1 PE=4 SV=1;>sp|P09488-2|GSTM1_HUMAN Isoform 2 of Glutathione S-transferase Mu 1 OS=Homo sapiens GN=GSTM1;>sp|Q03013-2|GSTM4_HUMAN Isoform 2 of Glutathione S-transferase Mu 4 OS=	8	3	1	0	2	1	2	1	2	2	0	0	0	0	0	1	0	0	0	0	0	0	24.8	8.7	0	17.39	149	149;181;195;218;218;85;157;237	2		1
O94817;C1IDX9	O94817;C1IDX9	3;3	3;3	3;3	Ubiquitin-like protein ATG12	ATG12	>sp|O94817|ATG12_HUMAN Ubiquitin-like protein ATG12 OS=Homo sapiens GN=ATG12 PE=1 SV=1;>tr|C1IDX9|C1IDX9_HUMAN ATG12 autophagy related 12 homolog (S. cerevisiae), isoform CRA_b OS=Homo sapiens GN=ATG12 PE=1 SV=1	2	3	3	3	2	2	3	2	2	2	2	2	3	2	2	2	2	2	3	2	2	2	18.6	18.6	18.6	15.113	140	140;187	8.14		1					5	6	6	4	3	3	5
C4AMC7;Q6VEQ5;Q9NQA3;H3BV49;A8K0Z3;A8MWX3	C4AMC7;Q6VEQ5;Q9NQA3;H3BV49;A8K0Z3;A8MWX3	5;5;4;3;3;3	5;5;4;3;3;3	5;5;4;3;3;3	Putative WAS protein family homolog 3;WAS protein family homolog 2;WAS protein family homolog 6;WAS protein family homolog 1;Putative WAS protein family homolog 4	WASH3P;WASH2P;WASH6P;WASH4P;WASH1	>sp|C4AMC7|WASH3_HUMAN Putative WAS protein family homolog 3 OS=Homo sapiens GN=WASH3P PE=2 SV=2;>sp|Q6VEQ5|WASH2_HUMAN WAS protein family homolog 2 OS=Homo sapiens GN=WASH2P PE=2 SV=2;>sp|Q9NQA3|WASH6_HUMAN WAS protein family homolog 6 OS=Homo sapiens GN=	6	5	5	5	4	4	5	3	5	5	4	4	5	3	5	5	4	4	5	3	5	5	11.2	11.2	11.2	49.994	463	463;465;447;300;465;477	5.86		6	3	2	6	2		11	4	1	6	5	6
C9JGJ9;F8WB99;C9IYK6;C9JTE9;Q9UHQ4;H7C5E2;Q9UHQ4-2	C9JGJ9;F8WB99;C9IYK6;C9JTE9;Q9UHQ4;H7C5E2;Q9UHQ4-2	1;1;1;1;1;1;1	1;1;1;1;1;1;1	1;1;1;1;1;1;1	B-cell receptor-associated protein 29	BCAP29	>tr|C9JGJ9|C9JGJ9_HUMAN B-cell receptor-associated protein 29 (Fragment) OS=Homo sapiens GN=BCAP29 PE=1 SV=1;>tr|F8WB99|F8WB99_HUMAN B-cell receptor-associated protein 29 OS=Homo sapiens GN=BCAP29 PE=1 SV=1;>tr|C9IYK6|C9IYK6_HUMAN B-cell receptor-associate	7	1	1	1	1	1	1	1	1	1	1	1	1	1	1	1	1	1	1	1	1	1	11.3	11.3	11.3	15.649	133	133;171;196;230;241;294;348	1	14										1	1	3
C9IYL4;P29083	C9IYL4;P29083	2;2	2;2	2;2	General transcription factor IIE subunit 1	GTF2E1	>tr|C9IYL4|C9IYL4_HUMAN General transcription factor IIE subunit 1 (Fragment) OS=Homo sapiens GN=GTF2E1 PE=1 SV=1;>sp|P29083|T2EA_HUMAN General transcription factor IIE subunit 1 OS=Homo sapiens GN=GTF2E1 PE=1 SV=2	2	2	2	2	1	2	2	2	1	1	1	2	2	2	1	1	1	2	2	2	1	1	24	24	24	14.437	129	129;439	3.26		10	10					2	1		4	5	4
C9IZ04;Q9NY27;Q9NY27-2;C9IZF4;F8WCA1;Q9NY27-3;H7C559	C9IZ04;Q9NY27;Q9NY27-2;C9IZF4;F8WCA1;Q9NY27-3	4;4;3;2;2;2;1	4;4;3;2;2;2;1	4;4;3;2;2;2;1	Serine/threonine-protein phosphatase 4 regulatory subunit 2	PPP4R2	>tr|C9IZ04|C9IZ04_HUMAN Serine/threonine-protein phosphatase 4 regulatory subunit 2 (Fragment) OS=Homo sapiens GN=PPP4R2 PE=1 SV=1;>sp|Q9NY27|PP4R2_HUMAN Serine/threonine-protein phosphatase 4 regulatory subunit 2 OS=Homo sapiens GN=PPP4R2 PE=1 SV=3;>sp|Q9	7	4	4	4	4	3	2	3	4	4	4	3	2	3	4	4	4	3	2	3	4	4	27	27	27	25.621	226	226;417;360;69;116;361;143	4.9	4	7	1					4		5	4	4	2
C9J3L8;C9J5W0;P43307;E9PAL7;C9IZQ1;P43307-2;F5H5Y2;C9JY01;C9JBX5	C9J3L8;C9J5W0;P43307;E9PAL7;C9IZQ1;P43307-2;F5H5Y2	5;5;5;5;5;4;4;1;1	5;5;5;5;5;4;4;1;1	5;5;5;5;5;4;4;1;1	Translocon-associated protein subunit alpha	SSR1	>tr|C9J3L8|C9J3L8_HUMAN Translocon-associated protein subunit alpha OS=Homo sapiens GN=SSR1 PE=1 SV=1;>tr|C9J5W0|C9J5W0_HUMAN Translocon-associated protein subunit alpha OS=Homo sapiens GN=SSR1 PE=1 SV=1;>sp|P43307|SSRA_HUMAN Translocon-associated protein	9	5	5	5	5	5	4	5	5	5	5	5	4	5	5	5	5	5	4	5	5	5	23.4	23.4	23.4	29.573	265	265;266;286;291;298;259;259;103;218	4.69	1	19	11	7	20	7			1	11	12	13	13
Q86WB0-3;C9J0I9;Q86WB0-2;Q86WB0	Q86WB0-3;C9J0I9;Q86WB0-2;Q86WB0	3;3;3;3	3;3;3;3	3;3;3;3	Nuclear-interacting partner of ALK	ZC3HC1	>sp|Q86WB0-3|NIPA_HUMAN Isoform 3 of Nuclear-interacting partner of ALK OS=Homo sapiens GN=ZC3HC1;>tr|C9J0I9|C9J0I9_HUMAN Nuclear-interacting partner of ALK OS=Homo sapiens GN=ZC3HC1 PE=1 SV=1;>sp|Q86WB0-2|NIPA_HUMAN Isoform 2 of Nuclear-interacting partne	4	3	3	3	2	3	1	2	2	2	2	3	1	2	2	2	2	3	1	2	2	2	8.1	8.1	8.1	47.771	431	431;459;481;502	7.59				7			1	4		10	4	5	2
C9J0K6;P30626-3;P30626-2;P30626;B4DHQ6	C9J0K6;P30626-3;P30626-2;P30626;B4DHQ6	9;9;9;9;5	9;9;9;9;5	9;9;9;9;5	Sorcin	SRI	>tr|C9J0K6|C9J0K6_HUMAN Sorcin OS=Homo sapiens GN=SRI PE=1 SV=1;>sp|P30626-3|SORCN_HUMAN Isoform 3 of Sorcin OS=Homo sapiens GN=SRI;>sp|P30626-2|SORCN_HUMAN Isoform 2 of Sorcin OS=Homo sapiens GN=SRI;>sp|P30626|SORCN_HUMAN Sorcin OS=Homo sapiens GN=SRI PE=	5	9	9	9	7	7	6	6	8	9	7	7	6	6	8	9	7	7	6	6	8	9	63.2	63.2	63.2	17.605	155	155;180;183;198;158	5.84	4	6	18	19	10	7	22	29	10	4	21	19	20
C9J0Q4;F8WFA6;F8WE49;Q9NS91	C9J0Q4;F8WFA6;F8WE49;Q9NS91	1;1;1;1	1;1;1;1	1;1;1;1	E3 ubiquitin-protein ligase RAD18	RAD18	>tr|C9J0Q4|C9J0Q4_HUMAN E3 ubiquitin-protein ligase RAD18 (Fragment) OS=Homo sapiens GN=RAD18 PE=1 SV=2;>tr|F8WFA6|F8WFA6_HUMAN E3 ubiquitin-protein ligase RAD18 OS=Homo sapiens GN=RAD18 PE=1 SV=1;>tr|F8WE49|F8WE49_HUMAN E3 ubiquitin-protein ligase RAD18 O	4	1	1	1	1	1	1	1	1	1	1	1	1	1	1	1	1	1	1	1	1	1	17.6	17.6	17.6	10.462	91	91;126;310;495	1.92	1	12									2	2	3
C9JE98;C9J239;Q9Y618-5;C9J0Q5;Q9Y618-4;C9JFD3;Q9Y618-3;Q9Y618;C9J7T7;C9JQE8;H7C1Y3;H0YGK8;C9J330;Q9Y618-2	C9JE98;C9J239;Q9Y618-5;C9J0Q5;Q9Y618-4;C9JFD3;Q9Y618-3;Q9Y618;C9J7T7;C9JQE8	7;7;7;7;7;7;7;7;6;5;1;1;1;1	7;7;7;7;7;7;7;7;6;5;1;1;1;1	6;6;6;6;6;6;6;6;5;4;1;1;1;1	Nuclear receptor corepressor 2	NCOR2	>tr|C9JE98|C9JE98_HUMAN Nuclear receptor corepressor 2 OS=Homo sapiens GN=NCOR2 PE=1 SV=1;>tr|C9J239|C9J239_HUMAN Nuclear receptor corepressor 2 OS=Homo sapiens GN=NCOR2 PE=1 SV=1;>sp|Q9Y618-5|NCOR2_HUMAN Isoform 5 of Nuclear receptor corepressor 2 OS=Homo	14	7	7	6	5	7	6	5	7	7	5	7	6	5	7	7	4	6	5	5	6	6	3.5	3.5	3.2	268.04	2458	2458;2459;2462;2504;2508;2514;2517;2525;2075;1451;245;275;493;769	7.36				8	1	9	4	6	6	11	7	8	7
Q70E73-5;C9J164;Q70E73-2;Q70E73-8;Q70E73-7;Q70E73-4;Q70E73-3;Q70E73-9;Q70E73-6;Q70E73;C9K0J5	Q70E73-5;C9J164;Q70E73-2;Q70E73-8;Q70E73-7;Q70E73-4;Q70E73-3;Q70E73-9;Q70E73-6;Q70E73;C9K0J5	2;2;2;2;2;2;2;2;2;2;2	2;2;2;2;2;2;2;2;2;2;2	2;2;2;2;2;2;2;2;2;2;2	Ras-associated and pleckstrin homology domains-containing protein 1	RAPH1	>sp|Q70E73-5|RAPH1_HUMAN Isoform RMO1c of Ras-associated and pleckstrin homology domains-containing protein 1 OS=Homo sapiens GN=RAPH1;>tr|C9J164|C9J164_HUMAN Ras-associated and pleckstrin homology domains-containing protein 1 OS=Homo sapiens GN=RAPH1 PE=1	11	2	2	2	0	1	0	1	1	0	0	1	0	1	1	0	0	1	0	1	1	0	3.4	3.4	3.4	66.949	592	592;594;597;617;619;622;624;644;649;1250;1302	4.67				1	2							1
C9J185;E7ER02;Q9NZJ5	C9J185;E7ER02;Q9NZJ5	1;1;1	1;1;1	1;1;1	Eukaryotic translation initiation factor 2-alpha kinase 3	EIF2AK3	>tr|C9J185|C9J185_HUMAN Eukaryotic translation initiation factor 2-alpha kinase 3 (Fragment) OS=Homo sapiens GN=EIF2AK3 PE=1 SV=1;>tr|E7ER02|E7ER02_HUMAN Eukaryotic translation initiation factor 2-alpha kinase 3 OS=Homo sapiens GN=EIF2AK3 PE=1 SV=1;>sp|Q9N	3	1	1	1	1	1	0	0	1	1	1	1	0	0	1	1	1	1	0	0	1	1	1.3	1.3	1.3	108.92	956	956;965;1116	1	5										1	1
F8WBU5;C9J391;C9J1C6;Q9P0P0;H7C426	F8WBU5;C9J391;C9J1C6;Q9P0P0;H7C426	2;2;2;2;2	2;2;2;2;2	2;2;2;2;2	E3 ubiquitin-protein ligase RNF181	RNF181	>tr|F8WBU5|F8WBU5_HUMAN E3 ubiquitin-protein ligase RNF181 OS=Homo sapiens GN=RNF181 PE=4 SV=1;>tr|C9J391|C9J391_HUMAN E3 ubiquitin-protein ligase RNF181 (Fragment) OS=Homo sapiens GN=RNF181 PE=4 SV=1;>tr|C9J1C6|C9J1C6_HUMAN E3 ubiquitin-protein ligase RNF	5	2	2	2	1	1	1	1	2	2	1	1	1	1	2	2	1	1	1	1	2	2	21.8	21.8	21.8	8.7797	78	78;103;139;153;170	5.73		2	1			1	6	1			1	1	2
C9J1Z8;P84085	C9J1Z8;P84085	8;8	3;3	3;3	ADP-ribosylation factor 5	ARF5	>tr|C9J1Z8|C9J1Z8_HUMAN ADP-ribosylation factor 5 (Fragment) OS=Homo sapiens GN=ARF5 PE=1 SV=1;>sp|P84085|ARF5_HUMAN ADP-ribosylation factor 5 OS=Homo sapiens GN=ARF5 PE=1 SV=2	2	8	3	3	8	8	8	8	8	8	3	3	3	3	3	3	3	3	3	3	3	3	65.3	24	24	17.107	150	150;180	6.54		8			1	6	8	6	6	4	6	7	7
C9J2U4;Q96BW9;Q96BW9-2	C9J2U4;Q96BW9;Q96BW9-2	2;2;1	2;2;1	2;2;1	Mitochondrial translocator assembly and maintenance protein 41 homolog	TAMM41	>tr|C9J2U4|C9J2U4_HUMAN Chromosome 3 open reading frame 31, isoform CRA_f OS=Homo sapiens GN=TAMM41 PE=1 SV=1;>sp|Q96BW9|TAM41_HUMAN Mitochondrial translocator assembly and maintenance protein 41 homolog OS=Homo sapiens GN=TAMM41 PE=1 SV=2;>sp|Q96BW9-2|TAM	3	2	2	2	2	1	1	1	2	1	2	1	1	1	2	1	2	1	1	1	2	1	8.3	8.3	8.3	38.078	337	337;452;316	7.33	2								6	1	3	1	1
C9J4M6;C9J2Y9;P30876	C9J4M6;C9J2Y9;P30876	28;28;28	28;28;28	28;28;28	DNA-directed RNA polymerase;DNA-directed RNA polymerase II subunit RPB2	POLR2B	>tr|C9J4M6|C9J4M6_HUMAN DNA-directed RNA polymerase OS=Homo sapiens GN=POLR2B PE=1 SV=2;>tr|C9J2Y9|C9J2Y9_HUMAN DNA-directed RNA polymerase OS=Homo sapiens GN=POLR2B PE=1 SV=2;>sp|P30876|RPB2_HUMAN DNA-directed RNA polymerase II subunit RPB2 OS=Homo sapien	3	28	28	28	26	27	22	24	25	26	26	27	22	24	25	26	26	27	22	24	25	26	25.9	25.9	25.9	125.19	1099	1099;1167;1174	6.21	16	32	16	15	14	29	17	11	45	44	41	42	35
C9J384;Q9BQ75-2;Q9BQ75;H7C515	C9J384;Q9BQ75-2;Q9BQ75	6;6;6;1	6;6;6;1	6;6;6;1	Protein CMSS1	CMSS1	>tr|C9J384|C9J384_HUMAN Protein CMSS1 (Fragment) OS=Homo sapiens GN=CMSS1 PE=1 SV=1;>sp|Q9BQ75-2|CMS1_HUMAN Isoform 2 of Protein CMSS1 OS=Homo sapiens GN=CMSS1;>sp|Q9BQ75|CMS1_HUMAN Protein CMSS1 OS=Homo sapiens GN=CMSS1 PE=1 SV=2	4	6	6	6	6	6	6	5	6	6	6	6	6	5	6	6	6	6	6	5	6	6	28	28	28	26.228	225	225;261;279;82	5.8	6	2	12	6		5	9	14	12		13	13	11
C9J3D7;Q9UKG9;Q9UKG9-3	C9J3D7;Q9UKG9;Q9UKG9-3	3;3;3	3;3;3	3;3;3	Peroxisomal carnitine O-octanoyltransferase	CROT	>tr|C9J3D7|C9J3D7_HUMAN Peroxisomal carnitine O-octanoyltransferase OS=Homo sapiens GN=CROT PE=1 SV=1;>sp|Q9UKG9|OCTC_HUMAN Peroxisomal carnitine O-octanoyltransferase OS=Homo sapiens GN=CROT PE=1 SV=2;>sp|Q9UKG9-3|OCTC_HUMAN Isoform 3 of Peroxisomal carni	3	3	3	3	2	1	2	2	2	3	2	1	2	2	2	3	2	1	2	2	2	3	5.4	5.4	5.4	65.883	574	574;612;640	4.93			5		3	5	2				2	2	4
C9J3F6;Q92609;Q92609-2	C9J3F6;Q92609;Q92609-2	6;6;6	6;6;6	6;6;6	TBC1 domain family member 5	TBC1D5	>tr|C9J3F6|C9J3F6_HUMAN TBC1 domain family member 5 OS=Homo sapiens GN=TBC1D5 PE=1 SV=1;>sp|Q92609|TBCD5_HUMAN TBC1 domain family member 5 OS=Homo sapiens GN=TBC1D5 PE=1 SV=1;>sp|Q92609-2|TBCD5_HUMAN Isoform 2 of TBC1 domain family member 5 OS=Homo sapiens	3	6	6	6	6	5	6	6	4	5	6	5	6	6	4	5	6	5	6	6	4	5	13.2	13.2	13.2	67.534	593	593;795;817	5.51		7	6	5			6	7	6		7	6	7
C9JYP1;C9J6Y8;X6RET8;C9JP05;C9J3Q3;C9J6N5;C9JQ40;C9JW51;Q9H098;Q9H098-2	C9JYP1;C9J6Y8;X6RET8;C9JP05;C9J3Q3;C9J6N5;C9JQ40;C9JW51;Q9H098;Q9H098-2	1;1;1;1;1;1;1;1;1;1	1;1;1;1;1;1;1;1;1;1	1;1;1;1;1;1;1;1;1;1	Protein FAM107B	FAM107B	>tr|C9JYP1|C9JYP1_HUMAN Protein FAM107B (Fragment) OS=Homo sapiens GN=FAM107B PE=1 SV=1;>tr|C9J6Y8|C9J6Y8_HUMAN Protein FAM107B (Fragment) OS=Homo sapiens GN=FAM107B PE=1 SV=1;>tr|X6RET8|X6RET8_HUMAN Protein FAM107B (Fragment) OS=Homo sapiens GN=FAM107B PE	10	1	1	1	1	1	1	1	1	1	1	1	1	1	1	1	1	1	1	1	1	1	17.9	17.9	17.9	8.0132	67	67;84;90;93;101;124;126;128;131;306	2.45		12	10								4	3	4
F8WEN0;C9JUE3;C9J3R7;Q5FWF6-3;C9J487;Q5FWF6	F8WEN0;C9JUE3;C9J3R7;Q5FWF6-3;C9J487;Q5FWF6	1;1;1;1;1;1	1;1;1;1;1;1	1;1;1;1;1;1	Zinc finger protein 789	ZNF789	>tr|F8WEN0|F8WEN0_HUMAN Zinc finger protein 789 OS=Homo sapiens GN=ZNF789 PE=4 SV=1;>tr|C9JUE3|C9JUE3_HUMAN Zinc finger protein 789 OS=Homo sapiens GN=ZNF789 PE=4 SV=1;>tr|C9J3R7|C9J3R7_HUMAN Zinc finger protein 789 OS=Homo sapiens GN=ZNF789 PE=4 SV=1;>sp|	6	1	1	1	1	1	1	1	1	1	1	1	1	1	1	1	1	1	1	1	1	1	25.5	25.5	25.5	6.7257	55	55;56;56;62;118;425	7.88							2	5	1		1	1	2
C9J406;H7C463	C9J406;H7C463	26;23	1;0	1;0		IMMT	>tr|C9J406|C9J406_HUMAN Mitochondrial inner membrane protein OS=Homo sapiens GN=IMMT PE=1 SV=1;>tr|H7C463|H7C463_HUMAN Mitochondrial inner membrane protein (Fragment) OS=Homo sapiens GN=IMMT PE=1 SV=1	2	26	1	1	25	24	24	22	22	21	0	0	1	0	0	0	0	0	1	0	0	0	45.8	2.1	2.1	73.253	659	659;613	10										1			1
C9J4W5;Q9GZV4;F8WCJ1;C9J7B5	C9J4W5;Q9GZV4;F8WCJ1;C9J7B5	6;6;5;5	1;1;0;0	1;1;0;0	Eukaryotic translation initiation factor 5A-2	EIF5A2	>tr|C9J4W5|C9J4W5_HUMAN Eukaryotic translation initiation factor 5A-2 (Fragment) OS=Homo sapiens GN=EIF5A2 PE=4 SV=1;>sp|Q9GZV4|IF5A2_HUMAN Eukaryotic translation initiation factor 5A-2 OS=Homo sapiens GN=EIF5A2 PE=1 SV=3;>tr|F8WCJ1|F8WCJ1_HUMAN Eukaryotic	4	6	1	1	6	6	6	6	6	6	1	1	1	1	1	1	1	1	1	1	1	1	50.4	10.4	10.4	12.821	115	115;153;105;109	1	12										2	2	2
C9J4Z3;P61513;M0R0A1;Q6P4E4;E9PEL3;M0R2L6;G5E9R3;A6NKH3	C9J4Z3;P61513;M0R0A1;Q6P4E4;E9PEL3;M0R2L6;G5E9R3	5;5;4;4;4;4;3;1	5;5;4;4;4;4;3;1	5;5;4;4;4;4;3;1	60S ribosomal protein L37a	RPL37A	>tr|C9J4Z3|C9J4Z3_HUMAN 60S ribosomal protein L37a OS=Homo sapiens GN=RPL37A PE=1 SV=1;>sp|P61513|RL37A_HUMAN 60S ribosomal protein L37a OS=Homo sapiens GN=RPL37A PE=1 SV=2;>tr|M0R0A1|M0R0A1_HUMAN 60S ribosomal protein L37a OS=Homo sapiens GN=RPL37A PE=1 S	8	5	5	5	5	5	5	5	5	5	5	5	5	5	5	5	5	5	5	5	5	5	69.1	69.1	69.1	7.624	68	68;92;60;72;75;88;58;93	5.18		24	25	10	2	10	28	23	5		23	20	23
H7C1U8;C9J574;Q9BUR5-2;Q9BUR5;G3V1B6	H7C1U8;C9J574;Q9BUR5-2;Q9BUR5	3;3;3;3;1	3;3;3;3;1	3;3;3;3;1	Apolipoprotein O	APOO	>tr|H7C1U8|H7C1U8_HUMAN Apolipoprotein O (Fragment) OS=Homo sapiens GN=APOO PE=1 SV=1;>tr|C9J574|C9J574_HUMAN Apolipoprotein O OS=Homo sapiens GN=APOO PE=1 SV=1;>sp|Q9BUR5-2|APOO_HUMAN Isoform 2 of Apolipoprotein O OS=Homo sapiens GN=APOO;>sp|Q9BUR5|APOO_H	5	3	3	3	3	3	2	2	2	2	3	3	2	2	2	2	3	3	2	2	2	2	15.7	15.7	15.7	20.08	178	178;179;180;198;114	4.93		6				1	8				3	3	3
Q9BXD5-5;C9J576;Q9BXD5-4;Q9BXD5-3;Q9BXD5	Q9BXD5-5;C9J576;Q9BXD5-4;Q9BXD5-3;Q9BXD5	1;1;1;1;1	1;1;1;1;1	1;1;1;1;1	N-acetylneuraminate lyase	NPL	>sp|Q9BXD5-5|NPL_HUMAN Isoform 5 of N-acetylneuraminate lyase OS=Homo sapiens GN=NPL;>tr|C9J576|C9J576_HUMAN N-acetylneuraminate lyase OS=Homo sapiens GN=NPL PE=4 SV=1;>sp|Q9BXD5-4|NPL_HUMAN Isoform 4 of N-acetylneuraminate lyase OS=Homo sapiens GN=NPL;>sp	5	1	1	1	1	1	1	1	1	1	1	1	1	1	1	1	1	1	1	1	1	1	8.3	8.3	8.3	12.201	109	109;109;240;284;320	6.33						6	3				2	1	1
C9J5A4;Q9P2N6-8;F8W894;E7EU88;Q9P2N6-6;Q9P2N6-2;Q9P2N6-5;Q9P2N6-4;Q9P2N6-3;Q9P2N6	C9J5A4;Q9P2N6-8;F8W894;E7EU88;Q9P2N6-6;Q9P2N6-2;Q9P2N6-5;Q9P2N6-4;Q9P2N6-3;Q9P2N6	1;1;1;1;1;1;1;1;1;1	1;1;1;1;1;1;1;1;1;1	1;1;1;1;1;1;1;1;1;1	KAT8 regulatory NSL complex subunit 3	KANSL3	>tr|C9J5A4|C9J5A4_HUMAN KAT8 regulatory NSL complex subunit 3 (Fragment) OS=Homo sapiens GN=KANSL3 PE=4 SV=2;>sp|Q9P2N6-8|KANL3_HUMAN Isoform 8 of KAT8 regulatory NSL complex subunit 3 OS=Homo sapiens GN=KANSL3;>tr|F8W894|F8W894_HUMAN KAT8 regulatory NSL c	10	1	1	1	1	1	1	1	1	1	1	1	1	1	1	1	1	1	1	1	1	1	8.1	8.1	8.1	18.583	172	172;530;530;698;764;780;789;791;878;904	8								6			1	1	1
C9JJV6;C9JZL8;C9J5M0;C9JC07;Q96S97	C9JJV6;C9JZL8;C9J5M0;C9JC07;Q96S97	2;2;2;2;2	2;2;2;2;2	2;2;2;2;2	Myeloid-associated differentiation marker	MYADM	>tr|C9JJV6|C9JJV6_HUMAN Myeloid-associated differentiation marker (Fragment) OS=Homo sapiens GN=MYADM PE=1 SV=2;>tr|C9JZL8|C9JZL8_HUMAN Myeloid-associated differentiation marker (Fragment) OS=Homo sapiens GN=MYADM PE=1 SV=1;>tr|C9J5M0|C9J5M0_HUMAN Myeloid-	5	2	2	2	1	1	2	1	1	1	1	1	2	1	1	1	1	1	2	1	1	1	22.6	22.6	22.6	15.864	146	146;188;242;259;322	9.36								1	7	6	2	2	3
Q9BTE6;C9J5N1;Q9BTE6-2;Q9BTE6-3;K7EQ85;L7N2F4;H7C054	Q9BTE6;C9J5N1;Q9BTE6-2;Q9BTE6-3;K7EQ85	9;9;9;9;5;2;1	9;9;9;9;5;2;1	9;9;9;9;5;2;1	Alanyl-tRNA editing protein Aarsd1	AARSD1;PTGES3L-AARSD1	>sp|Q9BTE6|AASD1_HUMAN Alanyl-tRNA editing protein Aarsd1 OS=Homo sapiens GN=AARSD1 PE=1 SV=2;>tr|C9J5N1|C9J5N1_HUMAN Protein PTGES3L-AARSD1 OS=Homo sapiens GN=PTGES3L-AARSD1 PE=1 SV=1;>sp|Q9BTE6-2|AASD1_HUMAN Isoform 2 of Alanyl-tRNA editing protein Aarsd	7	9	9	9	6	7	8	8	7	8	6	7	8	8	7	8	6	7	8	8	7	8	26.9	26.9	26.9	45.479	412	412;495;525;586;94;140;189	5.56	7	12	1	9	5	6	10		16	5	11	12	11
C9J7T9;P02585	C9J7T9;P02585	2;2	1;1	1;1	Troponin C, skeletal muscle	TNNC2	>tr|C9J7T9|C9J7T9_HUMAN Troponin C type 2 (Fast), isoform CRA_a OS=Homo sapiens GN=TNNC2 PE=4 SV=1;>sp|P02585|TNNC2_HUMAN Troponin C, skeletal muscle OS=Homo sapiens GN=TNNC2 PE=1 SV=2	2	2	1	1	2	2	2	2	1	1	1	1	1	1	0	0	1	1	1	1	0	0	10.3	5.5	5.5	16.382	145	145;160	5.6					2	3					1	1	1
H7C2R6;C9JX57;F5GXV2;D3DSE6;C9J818;P57076;H7BZW1;F8VZ95	H7C2R6;C9JX57;F5GXV2;D3DSE6;C9J818;P57076;H7BZW1;F8VZ95	1;1;1;1;1;1;1;1	1;1;1;1;1;1;1;1	1;1;1;1;1;1;1;1	Uncharacterized protein C21orf59	C21orf59	>tr|H7C2R6|H7C2R6_HUMAN UPF0769 protein C21orf59 (Fragment) OS=Homo sapiens GN=C21orf59 PE=4 SV=1;>tr|C9JX57|C9JX57_HUMAN UPF0769 protein C21orf59 (Fragment) OS=Homo sapiens GN=C21orf59 PE=4 SV=2;>tr|F5GXV2|F5GXV2_HUMAN UPF0769 protein C21orf59 OS=Homo sap	8	1	1	1	1	1	1	1	1	1	1	1	1	1	1	1	1	1	1	1	1	1	12	12	12	13.334	117	117;183;189;245;258;290;297;297	2		6									1	1	1
C9J8E1;Q16644	C9J8E1;Q16644	3;3	1;1	1;1	MAP kinase-activated protein kinase 3	MAPKAPK3	>tr|C9J8E1|C9J8E1_HUMAN MAP kinase-activated protein kinase 3 (Fragment) OS=Homo sapiens GN=MAPKAPK3 PE=1 SV=1;>sp|Q16644|MAPK3_HUMAN MAP kinase-activated protein kinase 3 OS=Homo sapiens GN=MAPKAPK3 PE=1 SV=1	2	3	1	1	3	3	3	3	2	3	1	1	1	1	0	1	1	1	1	1	0	1	11.1	5.1	5.1	37.389	332	332;382	9.17									5	1	2	1	1
Q14061;C9J8T6	Q14061;C9J8T6	1;1	1;1	1;1	Cytochrome c oxidase copper chaperone	COX17	>sp|Q14061|COX17_HUMAN Cytochrome c oxidase copper chaperone OS=Homo sapiens GN=COX17 PE=1 SV=2;>tr|C9J8T6|C9J8T6_HUMAN Cytochrome c oxidase copper chaperone OS=Homo sapiens GN=COX17 PE=1 SV=1	2	1	1	1	1	1	1	1	1	1	1	1	1	1	1	1	1	1	1	1	1	1	25.4	25.4	25.4	6.9151	63	63;98	1	11										2	2	1
Q9UQL0;C9J9H9;Q9Y2X8;P51668;D6RA11	Q9UQL0;C9J9H9;Q9Y2X8;P51668;D6RA11	2;2;2;2;1	1;1;1;1;0	1;1;1;1;0	Ubiquitin-conjugating enzyme E2 D4;Ubiquitin-conjugating enzyme E2 D1	UBE2D4;UBE2D1;UBE2D3	>tr|Q9UQL0|Q9UQL0_HUMAN Ubiquitin-conjugating enzyme 1 isoform OS=Homo sapiens GN=UBE2D4 PE=2 SV=1;>tr|C9J9H9|C9J9H9_HUMAN Ubiquitin-conjugating enzyme E2 D4 OS=Homo sapiens GN=UBE2D4 PE=3 SV=1;>sp|Q9Y2X8|UB2D4_HUMAN Ubiquitin-conjugating enzyme E2 D4 OS=H	5	2	1	1	2	2	2	2	2	2	1	1	1	1	1	1	1	1	1	1	1	1	26.6	10.1	10.1	12.463	109	109;122;147;147;96	6.62						6	6	1			2	2	2
C9J9K3;P08865;A6NE09;C9JQR9	C9J9K3;P08865;A6NE09	13;13;11;4	13;13;11;4	13;13;11;4	40S ribosomal protein SA	RPSA;RPSAP58	>tr|C9J9K3|C9J9K3_HUMAN 40S ribosomal protein SA (Fragment) OS=Homo sapiens GN=RPSA PE=1 SV=2;>sp|P08865|RSSA_HUMAN 40S ribosomal protein SA OS=Homo sapiens GN=RPSA PE=1 SV=4;>tr|A6NE09|A6NE09_HUMAN 40S ribosomal protein SA OS=Homo sapiens GN=RPSAP58 PE=3	4	13	13	13	13	13	12	13	13	12	13	13	12	13	13	12	13	13	12	13	13	12	64.6	64.6	64.6	29.404	263	263;295;295;73	6.64		10	5	9	46	67	65	27	22	28	46	48	46
C9J9V6;O75414;C9J1J2;C9JQB1;F2Z2J2;O75414-2;O75414-3	C9J9V6;O75414;C9J1J2;C9JQB1	3;3;2;2;1;1;1	3;3;2;2;1;1;1	3;3;2;2;1;1;1	Nucleoside diphosphate kinase;Nucleoside diphosphate kinase 6	NME6	>tr|C9J9V6|C9J9V6_HUMAN Nucleoside diphosphate kinase (Fragment) OS=Homo sapiens GN=NME6 PE=1 SV=1;>sp|O75414|NDK6_HUMAN Nucleoside diphosphate kinase 6 OS=Homo sapiens GN=NME6 PE=1 SV=3;>tr|C9J1J2|C9J1J2_HUMAN Nucleoside diphosphate kinase 6 (Fragment) OS	7	3	3	3	2	2	2	3	2	2	2	2	2	3	2	2	2	2	2	3	2	2	21.3	21.3	21.3	20.061	174	174;186;111;141;82;119;163	5.71		7							4	3	2	2	2
C9JA07;Q9GZY4;C9J6J1	C9JA07;Q9GZY4;C9J6J1	2;2;1	2;2;1	2;2;1	Cytochrome c oxidase assembly protein 1 homolog	COA1	>tr|C9JA07|C9JA07_HUMAN Cytochrome c oxidase assembly factor 1 homolog (Fragment) OS=Homo sapiens GN=COA1 PE=1 SV=1;>sp|Q9GZY4|COA1_HUMAN Cytochrome c oxidase assembly factor 1 homolog OS=Homo sapiens GN=COA1 PE=1 SV=1;>tr|C9J6J1|C9J6J1_HUMAN Cytochrome c	3	2	2	2	2	2	2	2	2	1	2	2	2	2	2	1	2	2	2	2	2	1	18.6	18.6	18.6	12.828	113	113;146;88	2.33	3	4	8								2	2	3
Q96D46;C9JA08;C9J0B9;C9IZW9;C9K0C2;C9IY70	Q96D46;C9JA08	14;14;6;4;4;3	14;14;6;4;4;3	14;14;6;4;4;3	60S ribosomal export protein NMD3	NMD3	>sp|Q96D46|NMD3_HUMAN 60S ribosomal export protein NMD3 OS=Homo sapiens GN=NMD3 PE=1 SV=1;>tr|C9JA08|C9JA08_HUMAN 60S ribosomal export protein NMD3 OS=Homo sapiens GN=NMD3 PE=1 SV=1	6	14	14	14	12	11	11	12	12	12	12	11	11	12	12	12	12	11	11	12	12	12	35.6	35.6	35.6	57.603	503	503;529;218;155;162;98	5.98	1	4	12	15	24	30	24	13	18	1	25	25	26
C9JAG1;Q9C0D9	C9JAG1;Q9C0D9	1;1	1;1	1;1	Ethanolaminephosphotransferase 1	EPT1	>tr|C9JAG1|C9JAG1_HUMAN Ethanolaminephosphotransferase 1 (Fragment) OS=Homo sapiens GN=EPT1 PE=1 SV=1;>sp|Q9C0D9|EPT1_HUMAN Ethanolaminephosphotransferase 1 OS=Homo sapiens GN=EPT1 PE=1 SV=3	2	1	1	1	1	1	1	1	1	1	1	1	1	1	1	1	1	1	1	1	1	1	8.9	8.9	8.9	20.557	180	180;397	2.33		6	3								1	2	1
C9JAM4;Q99685-2;Q99685	C9JAM4;Q99685-2;Q99685	1;1;1	1;1;1	1;1;1	Monoglyceride lipase	MGLL	>tr|C9JAM4|C9JAM4_HUMAN Monoglyceride lipase (Fragment) OS=Homo sapiens GN=MGLL PE=1 SV=1;>sp|Q99685-2|MGLL_HUMAN Isoform 2 of Monoglyceride lipase OS=Homo sapiens GN=MGLL;>sp|Q99685|MGLL_HUMAN Monoglyceride lipase OS=Homo sapiens GN=MGLL PE=1 SV=2	3	1	1	1	1	1	1	1	1	1	1	1	1	1	1	1	1	1	1	1	1	1	19.5	19.5	19.5	8.7809	77	77;283;303	7.35							11	6			3	4	3
Q9NW68-8;C9JB13;Q9NW68-2;Q9NW68;Q9NW68-7;Q9NW68-3;Q9NW68-9;Q9NW68-4;B4DM89;F8W6C6;E9PNA9;E9PS77;Q9NW68-5;E9PQA7	Q9NW68-8;C9JB13;Q9NW68-2;Q9NW68;Q9NW68-7;Q9NW68-3;Q9NW68-9;Q9NW68-4;B4DM89	4;4;4;4;4;4;3;3;3;1;1;1;1;1	4;4;4;4;4;4;3;3;3;1;1;1;1;1	4;4;4;4;4;4;3;3;3;1;1;1;1;1	BSD domain-containing protein 1	BSDC1	>sp|Q9NW68-8|BSDC1_HUMAN Isoform 8 of BSD domain-containing protein 1 OS=Homo sapiens GN=BSDC1;>tr|C9JB13|C9JB13_HUMAN BSD domain-containing protein 1 OS=Homo sapiens GN=BSDC1 PE=1 SV=1;>sp|Q9NW68-2|BSDC1_HUMAN Isoform 2 of BSD domain-containing protein 1	14	4	4	4	4	4	3	3	3	3	4	4	3	3	3	3	4	4	3	3	3	3	19	19	19	41.411	374	374;422;428;430;447;474;335;353;369;64;89;156;173;177	5.27	5					10	5	2			4	4	3
C9JB30;Q9UPY8;Q9UPY8-2	C9JB30;Q9UPY8;Q9UPY8-2	6;6;5	4;4;3	4;4;3	Microtubule-associated protein RP/EB family member 3	MAPRE3	>tr|C9JB30|C9JB30_HUMAN Microtubule-associated protein RP/EB family member 3 (Fragment) OS=Homo sapiens GN=MAPRE3 PE=1 SV=1;>sp|Q9UPY8|MARE3_HUMAN Microtubule-associated protein RP/EB family member 3 OS=Homo sapiens GN=MAPRE3 PE=1 SV=1;>sp|Q9UPY8-2|MARE3_H	3	6	4	4	5	6	6	5	6	6	3	4	4	3	4	4	3	4	4	3	4	4	20.6	16.1	16.1	24.582	218	218;281;266	7.54		1	3		1	4	4	12	15	1	7	5	7
C9JCL4;F8WCS4;C9JBC5;C9JZ71;O95376	C9JCL4;F8WCS4;C9JBC5;C9JZ71;O95376	1;1;1;1;1	1;1;1;1;1	1;1;1;1;1	E3 ubiquitin-protein ligase ARIH2	ARIH2	>tr|C9JCL4|C9JCL4_HUMAN E3 ubiquitin-protein ligase ARIH2 (Fragment) OS=Homo sapiens GN=ARIH2 PE=4 SV=1;>tr|F8WCS4|F8WCS4_HUMAN E3 ubiquitin-protein ligase ARIH2 OS=Homo sapiens GN=ARIH2 PE=4 SV=1;>tr|C9JBC5|C9JBC5_HUMAN E3 ubiquitin-protein ligase ARIH2 (	5	1	1	1	0	1	1	1	1	1	0	1	1	1	1	1	0	1	1	1	1	1	21.2	21.2	21.2	9.5448	85	85;106;107;138;493	4.9				2	7	1						2	1
E9PNC7;E9PQX9;Q14919;Q14919-2;C9JCC6	E9PNC7;E9PQX9;Q14919;Q14919-2;C9JCC6	2;2;2;2;2	2;2;2;2;2	2;2;2;2;2	Dr1-associated corepressor	DRAP1	>tr|E9PNC7|E9PNC7_HUMAN Dr1-associated corepressor (Fragment) OS=Homo sapiens GN=DRAP1 PE=1 SV=2;>tr|E9PQX9|E9PQX9_HUMAN Dr1-associated corepressor OS=Homo sapiens GN=DRAP1 PE=1 SV=1;>sp|Q14919|NC2A_HUMAN Dr1-associated corepressor OS=Homo sapiens GN=DRAP1	5	2	2	2	2	2	2	2	2	2	2	2	2	2	2	2	2	2	2	2	2	2	14.2	14.2	14.2	16.561	155	155;185;205;211;212	9.38									13	8	5	3	4
H7C405;C9JCD5	H7C405;C9JCD5	1;1	1;1	1;1		TM4SF19	>tr|H7C405|H7C405_HUMAN Transmembrane 4 L6 family member 19 (Fragment) OS=Homo sapiens GN=TM4SF19 PE=4 SV=1;>tr|C9JCD5|C9JCD5_HUMAN Transmembrane 4 L6 family member 19 OS=Homo sapiens GN=TM4SF19 PE=4 SV=1	2	1	1	1	1	1	1	1	1	1	1	1	1	1	1	1	1	1	1	1	1	1	6.4	6.4	6.4	12.271	110	110;299	8.67								3	6		1	1	2
C9JRA9;C9JCM6;C9JWU9;C9JSW2;Q5EB52-3;C9JW74;Q5EB52-2;Q5EB52;C9JG66;C9JUD2	C9JRA9;C9JCM6;C9JWU9;C9JSW2;Q5EB52-3;C9JW74;Q5EB52-2;Q5EB52;C9JG66;C9JUD2	3;3;3;3;3;3;3;3;2;2	3;3;3;3;3;3;3;3;2;2	3;3;3;3;3;3;3;3;2;2	Mesoderm-specific transcript homolog protein	MEST	>tr|C9JRA9|C9JRA9_HUMAN Mesoderm-specific transcript homolog protein (Fragment) OS=Homo sapiens GN=MEST PE=4 SV=1;>tr|C9JCM6|C9JCM6_HUMAN Mesoderm-specific transcript homolog protein (Fragment) OS=Homo sapiens GN=MEST PE=4 SV=2;>tr|C9JWU9|C9JWU9_HUMAN Meso	10	3	3	3	2	3	1	3	3	2	2	3	1	3	3	2	2	3	1	3	3	2	26.9	26.9	26.9	18.537	160	160;169;207;232;292;296;326;335;117;126	8.8							1	5	5	4	2	3	1
Q9NSV4-7;Q9NSV4-6;Q9NSV4-5;Q9NSV4-4;Q9NSV4;C9JDG0;Q9NSV4-1;Q9NSV4-2	Q9NSV4-7;Q9NSV4-6;Q9NSV4-5;Q9NSV4-4;Q9NSV4;C9JDG0;Q9NSV4-1;Q9NSV4-2	4;4;4;4;4;4;3;2	4;4;4;4;4;4;3;2	4;4;4;4;4;4;3;2	Protein diaphanous homolog 3	DIAPH3	>sp|Q9NSV4-7|DIAP3_HUMAN Isoform 7 of Protein diaphanous homolog 3 OS=Homo sapiens GN=DIAPH3;>sp|Q9NSV4-6|DIAP3_HUMAN Isoform 6 of Protein diaphanous homolog 3 OS=Homo sapiens GN=DIAPH3;>sp|Q9NSV4-5|DIAP3_HUMAN Isoform 5 of Protein diaphanous homolog 3 OS=	8	4	4	4	2	3	2	2	3	3	2	3	2	2	3	3	2	3	2	2	3	3	4.2	4.2	4.2	127.85	1112	1112;1123;1147;1182;1193;1193;849;691	7.71							10	2	5		2	3	3
C9JG97;Q13685;C9JEH3;C9JTS3;H7C0R2	C9JG97;Q13685;C9JEH3;C9JTS3	11;11;11;6;4	11;11;11;6;4	11;11;11;6;4	Angio-associated migratory cell protein	AAMP	>tr|C9JG97|C9JG97_HUMAN Angio-associated migratory cell protein OS=Homo sapiens GN=AAMP PE=1 SV=1;>sp|Q13685|AAMP_HUMAN Angio-associated migratory cell protein OS=Homo sapiens GN=AAMP PE=1 SV=2;>tr|C9JEH3|C9JEH3_HUMAN Angio-associated migratory cell protei	5	11	11	11	11	11	11	10	11	11	11	11	11	10	11	11	11	11	11	10	11	11	31.8	31.8	31.8	44.693	415	415;434;435;200;189	4.25	18	16	27	41	23	12	12	8	8		30	28	25
P49585;C9JEJ2;C9J050;H7C1T3;H7BZN1;C9J2E1;Q9Y5K3-2;Q9Y5K3-4;Q9Y5K3-3;Q9Y5K3;C9JPY0;C9JVS0;F8WAZ5;F2Z2B1	P49585;C9JEJ2;C9J050;H7C1T3;H7BZN1	10;10;9;7;5;4;4;4;4;4;2;1;1;1	10;10;9;7;5;4;4;4;4;4;2;1;1;1	10;10;9;7;5;4;4;4;4;4;2;1;1;1	Choline-phosphate cytidylyltransferase A	PCYT1A	>sp|P49585|PCY1A_HUMAN Choline-phosphate cytidylyltransferase A OS=Homo sapiens GN=PCYT1A PE=1 SV=2;>tr|C9JEJ2|C9JEJ2_HUMAN Choline-phosphate cytidylyltransferase A OS=Homo sapiens GN=PCYT1A PE=1 SV=1;>tr|C9J050|C9J050_HUMAN Choline-phosphate cytidylyltran	14	10	10	10	10	9	9	10	9	9	10	9	9	10	9	9	10	9	9	10	9	9	37.3	37.3	37.3	41.731	367	367;380;293;201;137;212;330;351;351;369;133;115;134;177	5.2	6	28	11			2	12	17	18		18	15	15
Q8IX18-3;C9JEW8;Q8IX18-2;Q8IX18;Q8IX18-4;J3KSW6;J3KTK0;F5H625	Q8IX18-3;C9JEW8;Q8IX18-2;Q8IX18;Q8IX18-4;J3KSW6	9;9;9;9;8;5;4;3	9;9;9;9;8;5;4;3	9;9;9;9;8;5;4;3	Probable ATP-dependent RNA helicase DHX40	DHX40	>sp|Q8IX18-3|DHX40_HUMAN Isoform 3 of Probable ATP-dependent RNA helicase DHX40 OS=Homo sapiens GN=DHX40;>tr|C9JEW8|C9JEW8_HUMAN Probable ATP-dependent RNA helicase DHX40 OS=Homo sapiens GN=DHX40 PE=1 SV=2;>sp|Q8IX18-2|DHX40_HUMAN Isoform 2 of Probable ATP	8	9	9	9	9	7	6	7	7	7	9	7	6	7	7	7	9	7	6	7	7	7	13.7	13.7	13.7	81.796	722	722;731;732;779;702;268;173;250	7.24			5	6	6	6	1	2	17	11	10	8	8
C9JEX3;Q13614-2;Q13614	C9JEX3;Q13614-2;Q13614	6;6;6	6;6;6	5;5;5	Myotubularin-related protein 2	MTMR2	>tr|C9JEX3|C9JEX3_HUMAN Myotubularin-related protein 2 (Fragment) OS=Homo sapiens GN=MTMR2 PE=4 SV=2;>sp|Q13614-2|MTMR2_HUMAN Isoform 2 of Myotubularin-related protein 2 OS=Homo sapiens GN=MTMR2;>sp|Q13614|MTMR2_HUMAN Myotubularin-related protein 2 OS=Homo	3	6	6	5	4	3	5	5	4	4	4	3	5	5	4	4	3	2	4	4	3	3	12.4	12.4	10.8	64.49	556	556;571;643	4.41		5	17	4	1		2	5	3		6	5	8
P05090;C9JF17;C9JX71;F8WBT9	P05090;C9JF17	7;7;3;1	7;7;3;1	7;7;3;1	Apolipoprotein D	APOD	>sp|P05090|APOD_HUMAN Apolipoprotein D OS=Homo sapiens GN=APOD PE=1 SV=1;>tr|C9JF17|C9JF17_HUMAN Apolipoprotein D (Fragment) OS=Homo sapiens GN=APOD PE=4 SV=1	4	7	7	7	7	7	7	7	7	7	7	7	7	7	7	7	7	7	7	7	7	7	34.9	34.9	34.9	21.275	189	189;215;149;108	2.52	1	52	26	11							15	16	12
C9JFE4;Q13098-5;Q13098;Q13098-7;Q13098-6;J3QLT0;J3KSA5;J3KRJ4;J3QS84;J3QS88;J3KTB0;J3QLE8;J3QL53;J3KRE8;J3QQX0	C9JFE4;Q13098-5;Q13098;Q13098-7;Q13098-6	10;10;10;10;7;4;4;4;3;3;3;3;3;3;1	10;10;10;10;7;4;4;4;3;3;3;3;3;3;1	10;10;10;10;7;4;4;4;3;3;3;3;3;3;1	COP9 signalosome complex subunit 1	GPS1	>tr|C9JFE4|C9JFE4_HUMAN COP9 signalosome complex subunit 1 OS=Homo sapiens GN=GPS1 PE=1 SV=2;>sp|Q13098-5|CSN1_HUMAN Isoform 4 of COP9 signalosome complex subunit 1 OS=Homo sapiens GN=GPS1;>sp|Q13098|CSN1_HUMAN COP9 signalosome complex subunit 1 OS=Homo sa	15	10	10	10	9	9	8	9	10	9	9	9	8	9	10	9	9	9	8	9	10	9	25.3	25.3	25.3	53.371	471	471;487;491;527;549;168;210;253;101;134;139;166;168;186;79	5.61		21	7	18	5	6	27	13	11	4	19	18	14
C9JFR7;P99999;CON__P62894	C9JFR7;P99999	7;7;1	7;7;1	7;7;1	Cytochrome c	CYCS	>tr|C9JFR7|C9JFR7_HUMAN Cytochrome c (Fragment) OS=Homo sapiens GN=CYCS PE=1 SV=1;>sp|P99999|CYC_HUMAN Cytochrome c OS=Homo sapiens GN=CYCS PE=1 SV=2	3	7	7	7	7	7	5	6	6	6	7	7	5	6	6	6	7	7	5	6	6	6	58.4	58.4	58.4	11.333	101	101;105;105	6.64		18	3		8	14	16	11	15	18	19	20	13
Q16854-3;Q16854-5;C9JFV8;Q16854;Q16854-4;Q16854-2	Q16854-3;Q16854-5;C9JFV8;Q16854;Q16854-4;Q16854-2	3;3;3;3;2;2	3;3;3;3;2;2	3;3;3;3;2;2	Deoxyguanosine kinase, mitochondrial	DGUOK	>sp|Q16854-3|DGUOK_HUMAN Isoform 3 of Deoxyguanosine kinase, mitochondrial OS=Homo sapiens GN=DGUOK;>sp|Q16854-5|DGUOK_HUMAN Isoform 5 of Deoxyguanosine kinase, mitochondrial OS=Homo sapiens GN=DGUOK;>tr|C9JFV8|C9JFV8_HUMAN Deoxyguanosine kinase, mitochond	6	3	3	3	3	3	2	3	3	3	3	3	2	3	3	3	3	3	2	3	3	3	15.9	15.9	15.9	27.873	239	239;255;255;277;151;189	4.76	3	6		1	6	7	1	5			7	5	5
Q6IA17;Q6IA17-2;C9JFX4;E9PLG6;H0YDF8;E9PSD9	Q6IA17;Q6IA17-2;C9JFX4;E9PLG6	4;4;4;3;1;1	4;4;4;3;1;1	4;4;4;3;1;1	Single Ig IL-1-related receptor	SIGIRR	>sp|Q6IA17|SIGIR_HUMAN Single Ig IL-1-related receptor OS=Homo sapiens GN=SIGIRR PE=1 SV=3;>sp|Q6IA17-2|SIGIR_HUMAN Isoform 2 of Single Ig IL-1-related receptor OS=Homo sapiens GN=SIGIRR;>tr|C9JFX4|C9JFX4_HUMAN Single Ig IL-1-related receptor OS=Homo sapie	6	4	4	4	4	4	2	4	4	4	4	4	2	4	4	4	4	4	2	4	4	4	10.5	10.5	10.5	45.679	410	410;504;504;189;142;143	7.87			1	6					6	10	4	4	3
C9JG41;Q9NQX7-2;Q9NQX7-3;Q9NQX7;F5H4I5;E7EUS6;B8ZZM6	C9JG41;Q9NQX7-2;Q9NQX7-3;Q9NQX7	3;3;3;3;1;1;1	3;3;3;3;1;1;1	3;3;3;3;1;1;1	Integral membrane protein 2C;CT-BRI3	ITM2C	>tr|C9JG41|C9JG41_HUMAN Integral membrane protein 2C (Fragment) OS=Homo sapiens GN=ITM2C PE=1 SV=1;>sp|Q9NQX7-2|ITM2C_HUMAN Isoform 2 of Integral membrane protein 2C OS=Homo sapiens GN=ITM2C;>sp|Q9NQX7-3|ITM2C_HUMAN Isoform 3 of Integral membrane protein 2	7	3	3	3	3	3	2	3	3	3	3	3	2	3	3	3	3	3	2	3	3	3	29.4	29.4	29.4	20.056	180	180;220;230;267;122;125;205	7.72						1	10	9	5		5	4	3
H7C0E6;O75319-2;C9JGC8;C9JYA6;O75319	H7C0E6;O75319-2;C9JGC8;C9JYA6;O75319	2;2;2;2;2	2;2;2;2;2	2;2;2;2;2	RNA/RNP complex-1-interacting phosphatase	DUSP11	>tr|H7C0E6|H7C0E6_HUMAN RNA/RNP complex-1-interacting phosphatase (Fragment) OS=Homo sapiens GN=DUSP11 PE=4 SV=1;>sp|O75319-2|DUS11_HUMAN Isoform 2 of RNA/RNP complex-1-interacting phosphatase OS=Homo sapiens GN=DUSP11;>tr|C9JGC8|C9JGC8_HUMAN RNA/RNP compl	5	2	2	2	1	1	1	2	1	1	1	1	1	2	1	1	1	1	1	2	1	1	20.7	20.7	20.7	17.774	150	150;226;226;273;330	3.78			2	7							1	1	2
P13798;C9JIF9;H7C393;H7C1U0;C9JLK2;F8WEH5;H0YFE5	P13798;C9JIF9;H7C393;H7C1U0	14;14;9;7;5;2;1	14;14;9;7;5;2;1	14;14;9;7;5;2;1	Acylamino-acid-releasing enzyme	APEH	>sp|P13798|ACPH_HUMAN Acylamino-acid-releasing enzyme OS=Homo sapiens GN=APEH PE=1 SV=4;>tr|C9JIF9|C9JIF9_HUMAN Acylamino-acid-releasing enzyme OS=Homo sapiens GN=APEH PE=1 SV=1;>tr|H7C393|H7C393_HUMAN Acylamino-acid-releasing enzyme (Fragment) OS=Homo sap	7	14	14	14	13	14	14	13	14	14	13	14	14	13	14	14	13	14	14	13	14	14	25.3	25.3	25.3	81.224	732	732;737;284;308;232;50;47	5.04		34	24	21	16	18	27	27	5	1	28	27	32
C9JIK8;Q9Y4P1-6;Q9Y4P1;Q9Y4P1-2;F2Z2K8;H7C2A6;C9JQ72;Q9Y4P1-3;F8WD71;Q9Y4P1-4;F5H7P2	C9JIK8;Q9Y4P1-6;Q9Y4P1;Q9Y4P1-2;F2Z2K8;H7C2A6;C9JQ72;Q9Y4P1-3;F8WD71;Q9Y4P1-4;F5H7P2	2;2;2;2;1;1;1;1;1;1;1	2;2;2;2;1;1;1;1;1;1;1	2;2;2;2;1;1;1;1;1;1;1	Cysteine protease ATG4B	ATG4B	>tr|C9JIK8|C9JIK8_HUMAN Cysteine protease ATG4B (Fragment) OS=Homo sapiens GN=ATG4B PE=1 SV=1;>sp|Q9Y4P1-6|ATG4B_HUMAN Isoform 6 of Cysteine protease ATG4B OS=Homo sapiens GN=ATG4B;>sp|Q9Y4P1|ATG4B_HUMAN Cysteine protease ATG4B OS=Homo sapiens GN=ATG4B PE=	11	2	2	2	1	2	2	2	2	2	1	2	2	2	2	2	1	2	2	2	2	2	12.3	12.3	12.3	24.833	219	219;380;393;468;88;193;266;280;319;331;379	3.38			8	5							1	2	2
P82930;C9JJ19	P82930;C9JJ19	8;8	8;8	8;8	28S ribosomal protein S34, mitochondrial	MRPS34	>sp|P82930|RT34_HUMAN 28S ribosomal protein S34, mitochondrial OS=Homo sapiens GN=MRPS34 PE=1 SV=2;>tr|C9JJ19|C9JJ19_HUMAN 28S ribosomal protein S34, mitochondrial OS=Homo sapiens GN=MRPS34 PE=1 SV=2	2	8	8	8	6	7	6	5	6	5	6	7	6	5	6	5	6	7	6	5	6	5	44	44	44	25.65	218	218;225	5.81		19		2	6	13	10	2	1	14	11	12	12
Q8N3P4-3;Q8N3P4;C9JJN9;Q8N3P4-2;H7C322	Q8N3P4-3;Q8N3P4;C9JJN9;Q8N3P4-2	10;10;10;9;1	10;10;10;9;1	10;10;10;9;1	Vacuolar protein sorting-associated protein 8 homolog	VPS8	>sp|Q8N3P4-3|VPS8_HUMAN Isoform 3 of Vacuolar protein sorting-associated protein 8 homolog OS=Homo sapiens GN=VPS8;>sp|Q8N3P4|VPS8_HUMAN Vacuolar protein sorting-associated protein 8 homolog OS=Homo sapiens GN=VPS8 PE=1 SV=3;>tr|C9JJN9|C9JJN9_HUMAN Vacuola	5	10	10	10	8	9	9	9	8	8	8	9	9	9	8	8	8	9	9	9	8	8	7.9	7.9	7.9	161.57	1426	1426;1428;1428;1336;108	6.94		5	4	2		10	14	13	11	6	10	12	11
C9JPX5;C9JKL2;O95772-2;O95772;C9JJ39;C9J3F5	C9JPX5;C9JKL2;O95772-2;O95772;C9JJ39;C9J3F5	2;2;2;2;1;1	2;2;2;2;1;1	2;2;2;2;1;1	MLN64 N-terminal domain homolog	STARD3NL	>tr|C9JPX5|C9JPX5_HUMAN MLN64 N-terminal domain homolog (Fragment) OS=Homo sapiens GN=STARD3NL PE=1 SV=1;>tr|C9JKL2|C9JKL2_HUMAN MLN64 N-terminal domain homolog OS=Homo sapiens GN=STARD3NL PE=1 SV=1;>sp|O95772-2|MENTO_HUMAN Isoform 2 of MLN64 N-terminal do	6	2	2	2	1	2	2	1	1	2	1	2	2	1	1	2	1	2	2	1	1	2	11.2	11.2	11.2	23.505	206	206;216;227;234;172;184	7.36			2	1				1	7		1	3	2
Q12767;C9JL75;Q12767-2	Q12767;C9JL75;Q12767-2	1;1;1	1;1;1	1;1;1	Uncharacterized protein KIAA0195	KIAA0195	>sp|Q12767|K0195_HUMAN Uncharacterized protein KIAA0195 OS=Homo sapiens GN=KIAA0195 PE=1 SV=1;>tr|C9JL75|C9JL75_HUMAN Uncharacterized protein OS=Homo sapiens GN=KIAA0195 PE=1 SV=2;>sp|Q12767-2|K0195_HUMAN Isoform 2 of Uncharacterized protein KIAA0195 OS=Ho	3	1	1	1	1	1	1	1	1	1	1	1	1	1	1	1	1	1	1	1	1	1	0.8	0.8	0.8	151.15	1356	1356;1366;1386	4				7							1	1	1
C9JLU1;P52434;P52434-3;P52434-2;P52434-4;P52434-5	C9JLU1;P52434;P52434-3;P52434-2;P52434-4	4;4;3;2;2;1	4;4;3;2;2;1	4;4;3;2;2;1	DNA-directed RNA polymerases I, II, and III subunit RPABC3	POLR2H	>tr|C9JLU1|C9JLU1_HUMAN DNA-directed RNA polymerases I, II, and III subunit RPABC3 (Fragment) OS=Homo sapiens GN=POLR2H PE=1 SV=2;>sp|P52434|RPAB3_HUMAN DNA-directed RNA polymerases I, II, and III subunit RPABC3 OS=Homo sapiens GN=POLR2H PE=1 SV=4;>sp|P524	6	4	4	4	4	4	1	3	3	4	4	4	1	3	3	4	4	4	1	3	3	4	35.1	35.1	35.1	16.925	148	148;150;114;122;175;86	5.15		21	1			1	3	2	2	10	9	8	2
C9JLV4;O14727-5;O14727-3;O14727-4;O14727-2;O14727;O14727-6	C9JLV4;O14727-5;O14727-3;O14727-4;O14727-2;O14727;O14727-6	5;5;5;5;5;5;3	5;5;5;5;5;5;3	5;5;5;5;5;5;3	Apoptotic protease-activating factor 1	APAF1	>tr|C9JLV4|C9JLV4_HUMAN Apoptotic protease-activating factor 1 OS=Homo sapiens GN=APAF1 PE=4 SV=1;>sp|O14727-5|APAF_HUMAN Isoform 5 of Apoptotic protease-activating factor 1 OS=Homo sapiens GN=APAF1;>sp|O14727-3|APAF_HUMAN Isoform 3 of Apoptotic protease-a	7	5	5	5	4	4	4	3	4	3	4	4	4	3	4	3	4	4	4	3	4	3	5	5	5	132.46	1163	1163;1171;1194;1205;1237;1248;338	6.92			2	2	1	8			11		4	4	5
I3L2L5;C9JLW8;I3L4Q0;I3L317;I3L3A7	I3L2L5;C9JLW8;I3L4Q0;I3L317	3;3;3;2;1	3;3;3;2;1	3;3;3;2;1	Protein FAM195B	FAM195B	>tr|I3L2L5|I3L2L5_HUMAN Protein FAM195B OS=Homo sapiens GN=FAM195B PE=1 SV=1;>sp|C9JLW8|F195B_HUMAN Protein FAM195B OS=Homo sapiens GN=FAM195B PE=1 SV=1;>tr|I3L4Q0|I3L4Q0_HUMAN HCG1818442, isoform CRA_a OS=Homo sapiens GN=FAM195B PE=1 SV=1;>tr|I3L317|I3L31	5	3	3	3	3	3	3	2	2	2	3	3	3	2	2	2	3	3	3	2	2	2	43.5	43.5	43.5	10.463	92	92;97;118;117;63	4.87	2	5			1	10	5				4	4	4
C9JM46;Q8N335;C9JFA7	C9JM46;Q8N335	3;3;1	3;3;1	3;3;1	Glycerol-3-phosphate dehydrogenase 1-like protein	GPD1L	>tr|C9JM46|C9JM46_HUMAN Glycerol-3-phosphate dehydrogenase 1-like protein (Fragment) OS=Homo sapiens GN=GPD1L PE=1 SV=1;>sp|Q8N335|GPD1L_HUMAN Glycerol-3-phosphate dehydrogenase 1-like protein OS=Homo sapiens GN=GPD1L PE=1 SV=1	3	3	3	3	1	1	2	1	1	2	1	1	2	1	1	2	1	1	2	1	1	2	17.9	17.9	17.9	18.642	173	173;351;144	4.89		1		1	6			1			1	1	3
Q9Y4F1;Q9Y4F1-2;C9JME2;M0QXT1;M0QYB0;H0Y783	Q9Y4F1;Q9Y4F1-2;C9JME2;M0QXT1	5;5;5;3;1;1	5;5;5;3;1;1	5;5;5;3;1;1	FERM, RhoGEF and pleckstrin domain-containing protein 1	FARP1	>sp|Q9Y4F1|FARP1_HUMAN FERM, RhoGEF and pleckstrin domain-containing protein 1 OS=Homo sapiens GN=FARP1 PE=1 SV=1;>sp|Q9Y4F1-2|FARP1_HUMAN Isoform 2 of FERM, RhoGEF and pleckstrin domain-containing protein 1 OS=Homo sapiens GN=FARP1;>tr|C9JME2|C9JME2_HUMAN	6	5	5	5	4	4	4	3	4	4	4	4	4	3	4	4	4	4	4	3	4	4	6.5	6.5	6.5	118.63	1045	1045;1076;1076;248;203;215	5.76			3	6	6	9	10	4			7	9	5
C9JQG7;Q9Y232-3;Q9Y232-4;Q9Y6F8;Q9Y6F7;Q9Y232-2;Q9Y6F8-2;C9JMH9;Q9Y232	C9JQG7;Q9Y232-3;Q9Y232-4;Q9Y6F8;Q9Y6F7;Q9Y232-2;Q9Y6F8-2;C9JMH9;Q9Y232	1;1;1;1;1;1;1;1;1	1;1;1;1;1;1;1;1;1	1;1;1;1;1;1;1;1;1	Testis-specific chromodomain protein Y 1;Testis-specific chromodomain protein Y 2;Chromodomain Y-like protein	CDYL;CDY1;CDY2A	>tr|C9JQG7|C9JQG7_HUMAN Chromodomain Y-like protein (Fragment) OS=Homo sapiens GN=CDYL PE=4 SV=1;>sp|Q9Y232-3|CDYL1_HUMAN Isoform 3 of Chromodomain Y-like protein OS=Homo sapiens GN=CDYL;>sp|Q9Y232-4|CDYL1_HUMAN Isoform 4 of Chromodomain Y-like protein OS=	9	1	1	1	0	1	0	1	0	0	0	1	0	1	0	0	0	1	0	1	0	0	5.8	5.8	5.8	19.276	171	171;309;412;540;541;544;554;555;598	10										2		1
C9JN15;Q13427-2;Q13427;E9PG73;C9JM79;C9JT64;C9J679	C9JN15;Q13427-2;Q13427;E9PG73;C9JM79	6;6;6;5;4;2;2	6;6;6;5;4;2;2	6;6;6;5;4;2;2	Peptidyl-prolyl cis-trans isomerase;Peptidyl-prolyl cis-trans isomerase G	PPIG	>tr|C9JN15|C9JN15_HUMAN Peptidyl-prolyl cis-trans isomerase (Fragment) OS=Homo sapiens GN=PPIG PE=3 SV=1;>sp|Q13427-2|PPIG_HUMAN Isoform 2 of Peptidyl-prolyl cis-trans isomerase G OS=Homo sapiens GN=PPIG;>sp|Q13427|PPIG_HUMAN Peptidyl-prolyl cis-trans isom	7	6	6	6	5	6	5	4	5	5	5	6	5	4	5	5	5	6	5	4	5	5	28	28	28	27.409	246	246;357;754;739;487;59;104	5.92	1	10	4			3	17	9	6		8	8	9
C9JXC3;C9JNE2;Q9Y530;H7C5Q1;C9J5P1;C9JA90;C9IZY1	C9JXC3;C9JNE2;Q9Y530	6;6;6;2;2;1;1	6;6;6;2;2;1;1	6;6;6;2;2;1;1	O-acetyl-ADP-ribose deacetylase 1	OARD1	>tr|C9JXC3|C9JXC3_HUMAN O-acetyl-ADP-ribose deacetylase 1 OS=Homo sapiens GN=OARD1 PE=1 SV=1;>tr|C9JNE2|C9JNE2_HUMAN O-acetyl-ADP-ribose deacetylase 1 (Fragment) OS=Homo sapiens GN=OARD1 PE=1 SV=1;>sp|Q9Y530|OARD1_HUMAN O-acetyl-ADP-ribose deacetylase 1 OS	7	6	6	6	5	5	6	4	5	5	5	5	6	4	5	5	5	5	6	4	5	5	43.4	43.4	43.4	12.782	113	113;131;152;77;86;77;88	5.43		17	6	2	1		1	6	5	9	8	8	10
C9JNK6;O75431-2;O75431;C9JAZ1	C9JNK6;O75431-2;O75431;C9JAZ1	4;4;4;3	4;4;4;3	4;4;4;3	Metaxin-2	MTX2	>tr|C9JNK6|C9JNK6_HUMAN Metaxin-2 OS=Homo sapiens GN=MTX2 PE=1 SV=1;>sp|O75431-2|MTX2_HUMAN Isoform 2 of Metaxin-2 OS=Homo sapiens GN=MTX2;>sp|O75431|MTX2_HUMAN Metaxin-2 OS=Homo sapiens GN=MTX2 PE=1 SV=1;>tr|C9JAZ1|C9JAZ1_HUMAN Metaxin-2 (Fragment) OS=Hom	4	4	4	4	4	4	3	4	4	4	4	4	3	4	4	4	4	4	3	4	4	4	29.5	29.5	29.5	23.643	207	207;253;263;229	4.78	6	16	2					6	1	9	9	8	4
F8WCQ4;C9JNP8;Q9H300-2;Q9H300;H7C0U0	F8WCQ4;C9JNP8;Q9H300-2;Q9H300;H7C0U0	2;2;2;2;1	2;2;2;2;1	2;2;2;2;1	Presenilins-associated rhomboid-like protein, mitochondrial;P-beta	PARL	>tr|F8WCQ4|F8WCQ4_HUMAN P-beta OS=Homo sapiens GN=PARL PE=4 SV=1;>tr|C9JNP8|C9JNP8_HUMAN P-beta OS=Homo sapiens GN=PARL PE=4 SV=1;>sp|Q9H300-2|PARL_HUMAN Isoform 2 of Presenilins-associated rhomboid-like protein, mitochondrial OS=Homo sapiens GN=PARL;>sp|Q	5	2	2	2	2	2	2	2	2	2	2	2	2	2	2	2	2	2	2	2	2	2	16.8	16.8	16.8	19.605	173	173;295;329;379;159	5.22		1	3	6	1		2	5			4	2	3
C9JXB8;C9JNW5;P83731	C9JXB8;C9JNW5;P83731	7;7;7	7;7;7	7;7;7	60S ribosomal protein L24	RPL24	>tr|C9JXB8|C9JXB8_HUMAN 60S ribosomal protein L24 OS=Homo sapiens GN=RPL24 PE=1 SV=1;>tr|C9JNW5|C9JNW5_HUMAN 60S ribosomal protein L24 OS=Homo sapiens GN=RPL24 PE=1 SV=1;>sp|P83731|RL24_HUMAN 60S ribosomal protein L24 OS=Homo sapiens GN=RPL24 PE=1 SV=1	3	7	7	7	7	7	6	6	7	6	7	7	6	6	7	6	7	7	6	6	7	6	52.1	52.1	52.1	14.369	121	121;150;157	5.78		18	13	18	10	1	22	20	8	11	17	19	22
C9JP00;Q9NR56;Q9NR56-3;Q9NR56-4;Q9NR56-7;Q9NR56-6;Q9NR56-2;Q9NR56-5;H7C4T5;Q86VM6;C9J4T8;C9JCX1;H7C4Y1	C9JP00;Q9NR56;Q9NR56-3;Q9NR56-4;Q9NR56-7;Q9NR56-6;Q9NR56-2;Q9NR56-5;H7C4T5;Q86VM6	8;8;6;6;6;6;6;6;5;5;2;1;1	8;8;6;6;6;6;6;6;5;5;2;1;1	3;3;1;1;1;1;1;1;0;2;0;0;0	Muscleblind-like protein 1	MBNL1	>tr|C9JP00|C9JP00_HUMAN Muscleblind-like protein 1 OS=Homo sapiens GN=MBNL1 PE=1 SV=1;>sp|Q9NR56|MBNL1_HUMAN Muscleblind-like protein 1 OS=Homo sapiens GN=MBNL1 PE=1 SV=2;>sp|Q9NR56-3|MBNL1_HUMAN Isoform 3 of Muscleblind-like protein 1 OS=Homo sapiens GN=M	13	8	8	3	7	8	8	8	6	8	7	8	8	8	6	8	3	3	3	3	2	3	28.7	28.7	16.1	37.898	348	348;388;302;314;340;342;370;382;329;343;58;155;210	6.78		5	5		5	25	18	14	17	4	15	17	18
C9JP16;O75718	C9JP16;O75718	6;6	6;6	6;6	Cartilage-associated protein	CRTAP	>tr|C9JP16|C9JP16_HUMAN Cartilage-associated protein OS=Homo sapiens GN=CRTAP PE=1 SV=1;>sp|O75718|CRTAP_HUMAN Cartilage-associated protein OS=Homo sapiens GN=CRTAP PE=1 SV=1	2	6	6	6	4	2	2	4	4	3	4	2	2	4	4	3	4	2	2	4	4	3	16.8	16.8	16.8	41.432	358	358;401	7.86	1				1	7	5	4	12	6	8	5	5
C9JP85;Q16656-2;Q16656;Q16656-4	C9JP85;Q16656-2;Q16656;Q16656-4	1;1;1;1	1;1;1;1	1;1;1;1	Nuclear respiratory factor 1	NRF1	>tr|C9JP85|C9JP85_HUMAN Nuclear respiratory factor 1 (Fragment) OS=Homo sapiens GN=NRF1 PE=1 SV=2;>sp|Q16656-2|NRF1_HUMAN Isoform Short of Nuclear respiratory factor 1 OS=Homo sapiens GN=NRF1;>sp|Q16656|NRF1_HUMAN Nuclear respiratory factor 1 OS=Homo sapie	4	1	1	1	1	1	1	1	1	1	1	1	1	1	1	1	1	1	1	1	1	1	5.7	5.7	5.7	22.689	209	209;437;503;522	8								6			1	1	1
Q9UK58-4;C9JPL0;Q9UK58;Q9UK58-5	Q9UK58-4;C9JPL0;Q9UK58;Q9UK58-5	2;2;2;1	2;2;2;1	2;2;2;1	Cyclin-L1	CCNL1	>sp|Q9UK58-4|CCNL1_HUMAN Isoform 2 of Cyclin-L1 OS=Homo sapiens GN=CCNL1;>tr|C9JPL0|C9JPL0_HUMAN Cyclin-L1 OS=Homo sapiens GN=CCNL1 PE=1 SV=1;>sp|Q9UK58|CCNL1_HUMAN Cyclin-L1 OS=Homo sapiens GN=CCNL1 PE=1 SV=1;>sp|Q9UK58-5|CCNL1_HUMAN Isoform 3 of Cyclin-L	4	2	2	2	2	2	1	2	2	2	2	2	1	2	2	2	2	2	1	2	2	2	12.9	12.9	12.9	25.408	232	232;428;526;172	7.93						3	5	1		5	3	2	1
P05166;E9PDR0;C9JQS9;E7ETT1;P05166-2;E7EX59;E7ETT4;E7EUY3;F8WBI9;E9PEC3;E7ENC1;H7C5C9;C9JVY9;C9JVW9;C9JAW3	P05166;E9PDR0;C9JQS9;E7ETT1;P05166-2;E7EX59;E7ETT4;E7EUY3;F8WBI9;E9PEC3;E7ENC1	15;15;15;14;14;14;13;13;12;11;9;4;4;3;2	15;15;15;14;14;14;13;13;12;11;9;4;4;3;2	15;15;15;14;14;14;13;13;12;11;9;4;4;3;2	Propionyl-CoA carboxylase beta chain, mitochondrial	PCCB	>sp|P05166|PCCB_HUMAN Propionyl-CoA carboxylase beta chain, mitochondrial OS=Homo sapiens GN=PCCB PE=1 SV=3;>tr|E9PDR0|E9PDR0_HUMAN Propionyl-CoA carboxylase beta chain, mitochondrial OS=Homo sapiens GN=PCCB PE=1 SV=1;>tr|C9JQS9|C9JQS9_HUMAN Propionyl-CoA	15	15	15	15	15	15	9	14	14	12	15	15	9	14	14	12	15	15	9	14	14	12	38.4	38.4	38.4	58.215	539	539;550;559;520;559;570;482;516;405;423;303;163;191;133;84	5.44	1	18	19	12	20	11	4	19	18	3	23	23	15
C9JQV0;Q9BRJ6;H7C0T1;H7C2R9	C9JQV0;Q9BRJ6;H7C0T1;H7C2R9	4;4;2;2	4;4;2;2	4;4;2;2	Uncharacterized protein C7orf50	C7orf50	>tr|C9JQV0|C9JQV0_HUMAN Uncharacterized protein C7orf50 (Fragment) OS=Homo sapiens GN=C7orf50 PE=1 SV=1;>sp|Q9BRJ6|CG050_HUMAN Uncharacterized protein C7orf50 OS=Homo sapiens GN=C7orf50 PE=1 SV=1;>tr|H7C0T1|H7C0T1_HUMAN Uncharacterized protein C7orf50 (Fra	4	4	4	4	4	4	4	4	4	4	4	4	4	4	4	4	4	4	4	4	4	4	34.9	34.9	34.9	21.883	192	192;194;162;179	2.07	17	15	4	8							8	8	7
C9JRD2;C9JXB9;P25686-2;P25686;C9J1G2;E7ETU0;C9JX00	C9JRD2;C9JXB9;P25686-2;P25686;C9J1G2;E7ETU0;C9JX00	2;2;2;2;1;1;1	2;2;2;2;1;1;1	2;2;2;2;1;1;1	DnaJ homolog subfamily B member 2	DNAJB2	>tr|C9JRD2|C9JRD2_HUMAN DnaJ homolog subfamily B member 2 (Fragment) OS=Homo sapiens GN=DNAJB2 PE=4 SV=1;>tr|C9JXB9|C9JXB9_HUMAN DnaJ homolog subfamily B member 2 (Fragment) OS=Homo sapiens GN=DNAJB2 PE=4 SV=1;>sp|P25686-2|DNJB2_HUMAN Isoform 2 of DnaJ hom	7	2	2	2	2	2	1	2	2	2	2	2	1	2	2	2	2	2	1	2	2	2	10.1	10.1	10.1	25.411	228	228;244;277;324;122;132;148	3.83			6	9	3						2	3	3
C9JRJ5;Q9UGP4	C9JRJ5;Q9UGP4	1;1	1;1	1;1	LIM domain-containing protein 1	LIMD1	>tr|C9JRJ5|C9JRJ5_HUMAN LIM domain-containing protein 1 OS=Homo sapiens GN=LIMD1 PE=1 SV=1;>sp|Q9UGP4|LIMD1_HUMAN LIM domain-containing protein 1 OS=Homo sapiens GN=LIMD1 PE=1 SV=1	2	1	1	1	1	1	1	1	1	1	1	1	1	1	1	1	1	1	1	1	1	1	2.9	2.9	2.9	65.534	620	620;676	3.83			1	5							1	1	1
C9JRL4	C9JRL4	5	1	1		MDH1	>tr|C9JRL4|C9JRL4_HUMAN Malate dehydrogenase, cytoplasmic (Fragment) OS=Homo sapiens GN=MDH1 PE=1 SV=2	1	5	1	1	5	5	4	5	4	5	1	1	0	1	0	1	1	1	0	1	0	1	59.7	16.8	16.8	12.973	119	119	9.25									15	5	7	8
Q9Y6M7-11;Q9Y6M7-14;Q9Y6M7-10;Q9Y6M7-4;Q9Y6M7-3;C9JRP1;Q9Y6M7-2;Q9Y6M7-9;Q9Y6M7-6;Q9Y6M7-13;Q9Y6M7-12;E9PFN4;Q9Y6M7;Q9Y6M7-8;Q9Y6M7-7;Q9Y6M7-5;H7C3C4	Q9Y6M7-11;Q9Y6M7-14;Q9Y6M7-10;Q9Y6M7-4;Q9Y6M7-3;C9JRP1;Q9Y6M7-2;Q9Y6M7-9;Q9Y6M7-6;Q9Y6M7-13;Q9Y6M7-12;E9PFN4;Q9Y6M7;Q9Y6M7-8;Q9Y6M7-7;Q9Y6M7-5;H7C3C4	2;2;2;2;2;2;2;2;2;2;2;2;2;2;2;1;1	2;2;2;2;2;2;2;2;2;2;2;2;2;2;2;1;1	2;2;2;2;2;2;2;2;2;2;2;2;2;2;2;1;1	Sodium bicarbonate cotransporter 3	SLC4A7	>sp|Q9Y6M7-11|S4A7_HUMAN Isoform 11 of Sodium bicarbonate cotransporter 3 OS=Homo sapiens GN=SLC4A7;>sp|Q9Y6M7-14|S4A7_HUMAN Isoform 14 of Sodium bicarbonate cotransporter 3 OS=Homo sapiens GN=SLC4A7;>sp|Q9Y6M7-10|S4A7_HUMAN Isoform 10 of Sodium bicarbonat	17	2	2	2	1	1	1	2	1	0	1	1	1	2	1	0	1	1	1	2	1	0	7.6	7.6	7.6	52.248	463	463;467;574;1000;1018;1051;1090;1095;1131;1135;1206;1210;1214;1246;1259;800;801	5.62				2	3	2				1	2	2	1
Q9NX63;C9JRZ6;G3V1K1;F8WAR4;F8WD73	Q9NX63;C9JRZ6;G3V1K1;F8WAR4	5;5;3;3;2	5;5;3;3;2	5;5;3;3;2	Coiled-coil-helix-coiled-coil-helix domain-containing protein 3, mitochondrial	CHCHD3	>sp|Q9NX63|CHCH3_HUMAN Coiled-coil-helix-coiled-coil-helix domain-containing protein 3, mitochondrial OS=Homo sapiens GN=CHCHD3 PE=1 SV=1;>tr|C9JRZ6|C9JRZ6_HUMAN Coiled-coil-helix-coiled-coil-helix domain-containing protein 3, mitochondrial OS=Homo sapiens	5	5	5	5	5	5	4	4	5	5	5	5	4	4	5	5	5	5	4	4	5	5	21.1	21.1	21.1	26.152	227	227;232;138;241;63	1.43	28	21									10	10	5
H0YK36;Q6V1X1-6;C9JSG1;J3KPT0;Q6V1X1-4;Q6V1X1-2;Q6V1X1-5;Q6V1X1-3;Q6V1X1	H0YK36;Q6V1X1-6;C9JSG1;J3KPT0;Q6V1X1-4;Q6V1X1-2;Q6V1X1-5;Q6V1X1-3;Q6V1X1	1;1;1;1;1;1;1;1;1	1;1;1;1;1;1;1;1;1	1;1;1;1;1;1;1;1;1	Dipeptidyl peptidase 8	DPP8	>tr|H0YK36|H0YK36_HUMAN Dipeptidyl peptidase 8 (Fragment) OS=Homo sapiens GN=DPP8 PE=4 SV=2;>sp|Q6V1X1-6|DPP8_HUMAN Isoform 6 of Dipeptidyl peptidase 8 OS=Homo sapiens GN=DPP8;>tr|C9JSG1|C9JSG1_HUMAN Dipeptidyl peptidase 8 OS=Homo sapiens GN=DPP8 PE=4 SV=1	9	1	1	1	1	1	1	1	1	1	1	1	1	1	1	1	1	1	1	1	1	1	4.2	4.2	4.2	41.085	361	361;725;725;729;782;847;849;882;898	2.25		6	2								1	2	1
C9JSZ2;Q96NT5-2;Q96NT5;J3QRF7	C9JSZ2;Q96NT5-2;Q96NT5	5;5;5;1	5;5;5;1	5;5;5;1	Proton-coupled folate transporter	SLC46A1	>tr|C9JSZ2|C9JSZ2_HUMAN Proton-coupled folate transporter OS=Homo sapiens GN=SLC46A1 PE=1 SV=1;>sp|Q96NT5-2|PCFT_HUMAN Isoform 2 of Proton-coupled folate transporter OS=Homo sapiens GN=SLC46A1;>sp|Q96NT5|PCFT_HUMAN Proton-coupled folate transporter OS=Homo	4	5	5	5	4	4	4	5	4	5	4	4	4	5	4	5	4	4	4	5	4	5	11.4	11.4	11.4	46.53	430	430;431;459;250	5.6	9	8	3		2	6	5	2	10	7	9	7	7
F8VNT9;F8VV56;P08962-3;P08962-2;F8W022;F8VWK8;C9JV86;P08962	F8VNT9;F8VV56;P08962-3;P08962-2;F8W022;F8VWK8;C9JV86;P08962	1;1;1;1;1;1;1;1	1;1;1;1;1;1;1;1	1;1;1;1;1;1;1;1	CD63 antigen	CD63	>tr|F8VNT9|F8VNT9_HUMAN CD63 antigen (Fragment) OS=Homo sapiens GN=CD63 PE=1 SV=1;>tr|F8VV56|F8VV56_HUMAN CD63 antigen OS=Homo sapiens GN=CD63 PE=1 SV=1;>sp|P08962-3|CD63_HUMAN Isoform 3 of CD63 antigen OS=Homo sapiens GN=CD63;>sp|P08962-2|CD63_HUMAN Isofo	8	1	1	1	1	1	1	1	1	1	1	1	1	1	1	1	1	1	1	1	1	1	7.5	7.5	7.5	14.265	133	133;145;156;215;215;217;236;238	5.35			1	6	16	13	3	1			6	5	7
Q9H9P8-2;C9JVN9;Q9H9P8;G3V272;G3V5S1	Q9H9P8-2;C9JVN9;Q9H9P8	12;12;12;3;2	12;12;12;3;2	12;12;12;3;2	L-2-hydroxyglutarate dehydrogenase, mitochondrial	L2HGDH	>sp|Q9H9P8-2|L2HDH_HUMAN Isoform 2 of L-2-hydroxyglutarate dehydrogenase, mitochondrial OS=Homo sapiens GN=L2HGDH;>tr|C9JVN9|C9JVN9_HUMAN L-2-hydroxyglutarate dehydrogenase, mitochondrial OS=Homo sapiens GN=L2HGDH PE=1 SV=1;>sp|Q9H9P8|L2HDH_HUMAN L-2-hydro	5	12	12	12	12	10	11	10	10	10	12	10	11	10	10	10	12	10	11	10	10	10	33.1	33.1	33.1	48.505	441	441;441;463;236;211	5.69		16	6	7	31	30	1		14	12	21	20	22
Q9Y2D2-3;C9JW63;Q9Y2D2;Q9Y2D2-2	Q9Y2D2-3;C9JW63;Q9Y2D2;Q9Y2D2-2	1;1;1;1	1;1;1;1	1;1;1;1	UDP-N-acetylglucosamine transporter	SLC35A3	>sp|Q9Y2D2-3|S35A3_HUMAN Isoform 3 of UDP-N-acetylglucosamine transporter OS=Homo sapiens GN=SLC35A3;>tr|C9JW63|C9JW63_HUMAN UDP-N-acetylglucosamine transporter (Fragment) OS=Homo sapiens GN=SLC35A3 PE=4 SV=1;>sp|Q9Y2D2|S35A3_HUMAN UDP-N-acetylglucosamine	4	1	1	1	1	1	1	1	1	1	1	1	1	1	1	1	1	1	1	1	1	1	6.8	6.8	6.8	24.545	220	220;224;325;367	5.91					2	8	1				3	2	3
C9JW94;Q9HBM1	C9JW94;Q9HBM1	4;4	4;4	4;4	Kinetochore protein Spc25	SPC25	>tr|C9JW94|C9JW94_HUMAN Kinetochore protein Spc25 (Fragment) OS=Homo sapiens GN=SPC25 PE=1 SV=1;>sp|Q9HBM1|SPC25_HUMAN Kinetochore protein Spc25 OS=Homo sapiens GN=SPC25 PE=1 SV=1	2	4	4	4	4	3	1	1	3	3	4	3	1	1	3	3	4	3	1	1	3	3	40	40	40	13.643	115	115;224	3.65		5	1	10	4						5	4	1
C9JWG0;F2Z3H1;C9J3M0;F2Z3P4;F8WC70	C9JWG0;F2Z3H1	10;5;2;2;2	1;0;0;0;0	1;0;0;0;0		UGP2	>tr|C9JWG0|C9JWG0_HUMAN UTP--glucose-1-phosphate uridylyltransferase (Fragment) OS=Homo sapiens GN=UGP2 PE=1 SV=1;>tr|F2Z3H1|F2Z3H1_HUMAN UTP--glucose-1-phosphate uridylyltransferase OS=Homo sapiens GN=UGP2 PE=1 SV=1	5	10	1	1	8	8	9	8	10	10	0	0	1	0	1	1	0	0	1	0	1	1	73.3	6.7	6.7	16.929	150	150;76;38;48;52	2		3											1
O15530-2;E9PER6;O15530-3;C9JWR9;O15530;Q6A1A2;O15530-4;O15530-5;H3BQ10;H3BPW1	O15530-2;E9PER6;O15530-3;C9JWR9;O15530;Q6A1A2;O15530-4;O15530-5	8;8;8;8;8;6;6;6;3;1	8;8;8;8;8;6;6;6;3;1	8;8;8;8;8;6;6;6;3;1	3-phosphoinositide-dependent protein kinase 1;Putative 3-phosphoinositide-dependent protein kinase 2	PDPK1;PDPK2	>sp|O15530-2|PDPK1_HUMAN Isoform 2 of 3-phosphoinositide-dependent protein kinase 1 OS=Homo sapiens GN=PDPK1;>tr|E9PER6|E9PER6_HUMAN 3-phosphoinositide-dependent protein kinase 1 OS=Homo sapiens GN=PDPK1 PE=1 SV=1;>sp|O15530-3|PDPK1_HUMAN Isoform 3 of 3-ph	10	8	8	8	7	6	8	7	6	7	7	6	8	7	6	7	7	6	8	7	6	7	19.6	19.6	19.6	58.034	506	506;529;530;532;556;396;429;454;149;88	7.19			2	8	1	12	10	13	23		10	11	10
H7C0G7;C9JWV4;G5E9Q8;Q9H9Q4;Q9H9Q4-2	H7C0G7;C9JWV4;G5E9Q8;Q9H9Q4;Q9H9Q4-2	2;2;2;2;2	2;2;2;2;2	2;2;2;2;2	Non-homologous end-joining factor 1	NHEJ1	>tr|H7C0G7|H7C0G7_HUMAN Non-homologous end-joining factor 1 (Fragment) OS=Homo sapiens GN=NHEJ1 PE=4 SV=1;>tr|C9JWV4|C9JWV4_HUMAN Non-homologous end-joining factor 1 (Fragment) OS=Homo sapiens GN=NHEJ1 PE=4 SV=1;>tr|G5E9Q8|G5E9Q8_HUMAN HCG2043685, isoform	5	2	2	2	0	1	2	1	1	1	0	1	2	1	1	1	0	1	2	1	1	1	13.8	13.8	13.8	24.751	224	224;229;232;299;316	6.75		1					4	3				2	2
Q0VGL1;C9JXA7	Q0VGL1;C9JXA7	2;2	2;2	2;2	Ragulator complex protein LAMTOR4	LAMTOR4	>sp|Q0VGL1|LTOR4_HUMAN Ragulator complex protein LAMTOR4 OS=Homo sapiens GN=LAMTOR4 PE=1 SV=1;>tr|C9JXA7|C9JXA7_HUMAN Ragulator complex protein LAMTOR4 OS=Homo sapiens GN=LAMTOR4 PE=1 SV=1	2	2	2	2	1	2	2	2	2	2	1	2	2	2	2	2	1	2	2	2	2	2	17.2	17.2	17.2	10.741	99	99;137	4.48		3	5	3	11	7					4	5	5
C9JYM0;O75817	C9JYM0;O75817	4;4	4;4	4;4	Ribonuclease P protein subunit p20	POP7	>tr|C9JYM0|C9JYM0_HUMAN Ribonuclease P protein subunit p20 (Fragment) OS=Homo sapiens GN=POP7 PE=1 SV=1;>sp|O75817|POP7_HUMAN Ribonuclease P protein subunit p20 OS=Homo sapiens GN=POP7 PE=1 SV=2	2	4	4	4	4	3	4	3	4	4	4	3	4	3	4	4	4	3	4	3	4	4	38	38	38	15.324	137	137;140	3.53	5	5	13	1				6			5	4	5
C9JYN0;Q16563-2;Q16563;H7C4J8	C9JYN0;Q16563-2;Q16563	3;3;2;1	3;3;2;1	3;3;2;1	Synaptophysin-like protein 1	SYPL1	>tr|C9JYN0|C9JYN0_HUMAN Synaptophysin-like protein 1 OS=Homo sapiens GN=SYPL1 PE=1 SV=1;>sp|Q16563-2|SYPL1_HUMAN Isoform 2 of Synaptophysin-like protein 1 OS=Homo sapiens GN=SYPL1;>sp|Q16563|SYPL1_HUMAN Synaptophysin-like protein 1 OS=Homo sapiens GN=SYPL1	4	3	3	3	3	3	3	3	3	3	3	3	3	3	3	3	3	3	3	3	3	3	16.5	16.5	16.5	24.784	224	224;241;259;148	7.21				12	1				15	5	5	5	5
Q92823-3;C9JYY6;Q92823-4;Q92823-6;Q92823-2;F8W775;Q92823;Q92823-5;C9JH43	Q92823-3;C9JYY6;Q92823-4;Q92823-6;Q92823-2;F8W775;Q92823;Q92823-5	14;14;14;14;14;14;14;14;6	14;14;14;14;14;14;14;14;6	14;14;14;14;14;14;14;14;6	Neuronal cell adhesion molecule	NRCAM	>sp|Q92823-3|NRCAM_HUMAN Isoform 3 of Neuronal cell adhesion molecule OS=Homo sapiens GN=NRCAM;>tr|C9JYY6|C9JYY6_HUMAN Neuronal cell adhesion molecule OS=Homo sapiens GN=NRCAM PE=4 SV=2;>sp|Q92823-4|NRCAM_HUMAN Isoform 4 of Neuronal cell adhesion molecule	9	14	14	14	13	13	10	9	11	13	13	13	10	9	11	13	13	13	10	9	11	13	14.2	14.2	14.2	130.67	1180	1180;1180;1183;1192;1236;1236;1304;1308;431	5.89	6	14	3	12	10	17	9	18	20	3	19	23	15
C9JZG9;C9JZY6;P62256;H7C4M9;P62256-2;C9J8Q9	C9JZG9;C9JZY6;P62256;H7C4M9;P62256-2;C9J8Q9	4;4;4;3;3;2	4;4;4;3;3;2	4;4;4;3;3;2	Ubiquitin-conjugating enzyme E2 H	UBE2H	>tr|C9JZG9|C9JZG9_HUMAN Ubiquitin-conjugating enzyme E2 H (Fragment) OS=Homo sapiens GN=UBE2H PE=1 SV=1;>tr|C9JZY6|C9JZY6_HUMAN Ubiquitin-conjugating enzyme E2 H (Fragment) OS=Homo sapiens GN=UBE2H PE=1 SV=1;>sp|P62256|UBE2H_HUMAN Ubiquitin-conjugating enz	6	4	4	4	4	4	3	4	3	4	4	4	3	4	3	4	4	4	3	4	3	4	47.6	47.6	47.6	11.545	103	103;123;183;62;152;149	5.75			2	12	7	9	11	7			11	8	7
O60716-21;O60716-19;O60716-18;O60716-17;O60716-13;O60716-11;O60716-10;O60716-9;O60716-5;C9JZR2;O60716-3;O60716-2;O60716;O60716-24;O60716-23;O60716-22;O60716-20;O60716-16;O60716-15;O60716-14;O60716-12;O60716-8;O60716-7;O60716-6;O60716-4;O60716-29;O60716-27;O60716-26;O60716-25;O60716-32;O60716-31;O60716-30;O60716-28;E9PKY0;E9PRE2;H0YC95;E9PKL1	O60716-21;O60716-19;O60716-18;O60716-17;O60716-13;O60716-11;O60716-10;O60716-9;O60716-5;C9JZR2;O60716-3;O60716-2;O60716;O60716-24;O60716-23;O60716-22;O60716-20;O60716-16;O60716-15;O60716-14;O60716-12;O60716-8;O60716-7;O60716-6;O60716-4;O60716-29;O60716-27;O60716-26;O60716-25;O60716-32;O60716-31;O60716-30;O60716-28	34;34;34;34;34;34;34;34;34;34;34;34;34;33;33;33;33;33;33;33;33;33;33;33;33;26;26;26;26;25;25;25;25;7;7;4;1	34;34;34;34;34;34;34;34;34;34;34;34;34;33;33;33;33;33;33;33;33;33;33;33;33;26;26;26;26;25;25;25;25;7;7;4;1	34;34;34;34;34;34;34;34;34;34;34;34;34;33;33;33;33;33;33;33;33;33;33;33;33;26;26;26;26;25;25;25;25;7;7;4;1	Catenin delta-1	CTNND1	>sp|O60716-21|CTND1_HUMAN Isoform 3A of Catenin delta-1 OS=Homo sapiens GN=CTNND1;>sp|O60716-19|CTND1_HUMAN Isoform 3AC of Catenin delta-1 OS=Homo sapiens GN=CTNND1;>sp|O60716-18|CTND1_HUMAN Isoform 3AB of Catenin delta-1 OS=Homo sapiens GN=CTNND1;>sp|O607	37	34	34	34	31	32	29	31	32	34	31	32	29	31	32	34	31	32	29	31	32	34	54.8	54.8	54.8	92.674	832	832;838;861;867;879;885;908;914;933;938;939;962;968;811;817;840;846;858;864;887;893;912;918;941;947;610;616;639;645;589;595;618;624;126;261;123;128	4.99	36	76	52	38	23	27	43	41	37	25	70	73	61
C9JZR4;Q9NP61-2;Q9NP61;B0QYV8;B0QYV9;H0Y6A0	C9JZR4;Q9NP61-2;Q9NP61;B0QYV8	5;5;5;4;2;2	4;4;4;3;1;2	4;4;4;3;1;2	ADP-ribosylation factor GTPase-activating protein 3	ARFGAP3	>tr|C9JZR4|C9JZR4_HUMAN ADP-ribosylation factor GTPase-activating protein 3 OS=Homo sapiens GN=ARFGAP3 PE=1 SV=2;>sp|Q9NP61-2|ARFG3_HUMAN Isoform 2 of ADP-ribosylation factor GTPase-activating protein 3 OS=Homo sapiens GN=ARFGAP3;>sp|Q9NP61|ARFG3_HUMAN ADP	6	5	4	4	5	4	4	5	5	4	4	3	4	4	4	4	4	3	4	4	4	4	10.1	7.9	7.9	48.884	444	444;472;516;152;92;273	5.54		6		1	6	2	2	9			4	4	5
C9K0E9;P22760	C9K0E9;P22760	1;1	1;1	1;1	Arylacetamide deacetylase	AADAC	>tr|C9K0E9|C9K0E9_HUMAN Arylacetamide deacetylase OS=Homo sapiens GN=AADAC PE=4 SV=1;>sp|P22760|AAAD_HUMAN Arylacetamide deacetylase OS=Homo sapiens GN=AADAC PE=1 SV=5	2	1	1	1	0	1	0	1	1	1	0	1	0	1	1	1	0	1	0	1	1	1	4.4	4.4	4.4	23.061	204	204;399	2		4										1
Q7Z422-2;Q7Z422-4;Q7Z422-3;C9K0U0;Q7Z422;F8WEE8	Q7Z422-2;Q7Z422-4;Q7Z422-3;C9K0U0;Q7Z422;F8WEE8	1;1;1;1;1;1	1;1;1;1;1;1	1;1;1;1;1;1	SUZ domain-containing protein 1	SZRD1	>sp|Q7Z422-2|SZRD1_HUMAN Isoform 2 of SUZ domain-containing protein 1 OS=Homo sapiens GN=SZRD1;>sp|Q7Z422-4|SZRD1_HUMAN Isoform 4 of SUZ domain-containing protein 1 OS=Homo sapiens GN=SZRD1;>sp|Q7Z422-3|SZRD1_HUMAN Isoform 3 of SUZ domain-containing protei	6	1	1	1	1	1	1	1	1	1	1	1	1	1	1	1	1	1	1	1	1	1	15.9	15.9	15.9	14.604	132	132;133;134;151;152;158	2		6									1	1	1
C9K0U5;H7C608;E2QRF9;O75496	C9K0U5;H7C608;E2QRF9;O75496	1;1;1;1	1;1;1;1	1;1;1;1	Geminin	GMNN	>tr|C9K0U5|C9K0U5_HUMAN Geminin (Fragment) OS=Homo sapiens GN=GMNN PE=1 SV=2;>tr|H7C608|H7C608_HUMAN Geminin (Fragment) OS=Homo sapiens GN=GMNN PE=1 SV=1;>tr|E2QRF9|E2QRF9_HUMAN Geminin (Fragment) OS=Homo sapiens GN=GMNN PE=1 SV=1;>sp|O75496|GEMI_HUMAN Gem	4	1	1	1	1	1	1	1	1	1	1	1	1	1	1	1	1	1	1	1	1	1	20	20	20	7.2471	65	65;102;179;209	7.35			1				6	10			3	2	2
O14662-6;O14662-2;O14662-4;C9K0W8;O14662-5;O14662;G8JLE0;H3BU86;F8W9Z6;Q96NX8;B7ZBM8;B7ZBM4;B7ZBM5;E9PND6;O14662-3;H0YEW0	O14662-6;O14662-2;O14662-4;C9K0W8;O14662-5;O14662;G8JLE0;H3BU86;F8W9Z6;Q96NX8;B7ZBM8	5;5;5;5;5;5;5;5;4;3;3;2;2;1;1;1	5;5;5;5;5;5;5;5;4;3;3;2;2;1;1;1	5;5;5;5;5;5;5;5;4;3;3;2;2;1;1;1	Syntaxin-16	STX16;STX16-NPEPL1	>sp|O14662-6|STX16_HUMAN Isoform 6 of Syntaxin-16 OS=Homo sapiens GN=STX16;>sp|O14662-2|STX16_HUMAN Isoform A of Syntaxin-16 OS=Homo sapiens GN=STX16;>sp|O14662-4|STX16_HUMAN Isoform D of Syntaxin-16 OS=Homo sapiens GN=STX16;>tr|C9K0W8|C9K0W8_HUMAN Unchara	16	5	5	5	5	4	3	2	4	4	5	4	3	2	4	4	5	4	3	2	4	4	21.7	21.7	21.7	31.073	272	272;304;308;308;321;325;325;382;204;202;219;120;122;79;115;126	4.62	1	6	5	4	4	6		6			7	6	6
P68363;CON__ENSEMBL:ENSBTAP00000016242;F8VVB9;C9JDS9;F8VS66;F8VRZ4;F8VWV9;F8VX09;F8VRK0;F8W0F6;F8VXZ7	P68363;CON__ENSEMBL:ENSBTAP00000016242;F8VVB9	25;25;14;9;8;7;6;5;3;2;1	25;25;14;9;8;7;6;5;3;2;1	0;0;0;0;0;0;0;0;0;0;0	Tubulin alpha-1B chain	TUBA1B	>sp|P68363|TBA1B_HUMAN Tubulin alpha-1B chain OS=Homo sapiens GN=TUBA1B PE=1 SV=1;>ENSEMBL:ENSBTAP00000016242 (Bos taurus) similar to alpha-tubulin I isoform 1;>tr|F8VVB9|F8VVB9_HUMAN Tubulin alpha-1B chain (Fragment) OS=Homo sapiens GN=TUBA1B PE=4 SV=2	11	25	25	0	24	25	23	23	23	21	24	25	23	23	23	21	0	0	0	0	0	0	75.2	75.2	0	50.151	451	451;451;246;156;130;112;81;75;49;231;26	5.92	1	102	110	111	100	65	68	85	97	117	147	149	129
CON__Q3MHN5;CON__ENSEMBL:ENSBTAP00000018229	CON__Q3MHN5;CON__ENSEMBL:ENSBTAP00000018229	3;3	3;3	3;3			>Q3MHN5 SWISS-PROT:Q3MHN5 (Bos taurus) Vitamin D-binding protein precursor;>ENSEMBL:ENSBTAP00000018229 (Bos taurus) 54 kDa protein	2	3	3	3	1	3	3	3	3	3	1	3	3	3	3	3	1	3	3	3	3	3	8.4	8.4	8.4	53.341	474	474;475	6.76				2	3	3	3	10			1	4	3
CON__ENSEMBL:ENSBTAP00000024146	CON__ENSEMBL:ENSBTAP00000024146	3	3	3			>ENSEMBL:ENSBTAP00000024146 (Bos taurus) similar to alpha-2-macroglobulin isoform 1	1	3	3	3	0	0	0	2	3	1	0	0	0	2	3	1	0	0	0	2	3	1	3	3	3	164.34	1477	1477	4.17			1	4		1
CON__ENSEMBL:ENSBTAP00000034412	CON__ENSEMBL:ENSBTAP00000034412	3	3	3			>ENSEMBL:ENSBTAP00000034412 (Bos taurus) similar to C4b-binding protein alpha chain	1	3	3	3	2	2	2	2	2	1	2	2	2	2	2	1	2	2	2	2	2	1	16.1	16.1	16.1	22.336	199	199	1.91	1	10									2	2	2
CON__ENSEMBL:ENSBTAP00000038253	CON__ENSEMBL:ENSBTAP00000038253	4	1	1			>ENSEMBL:ENSBTAP00000038253 (Bos taurus) 63 kDa protein	1	4	1	1	3	3	3	3	3	4	0	0	0	0	0	1	0	0	0	0	0	1	6.6	1.2	1.2	63.165	606	606	2		1
K7ERE3;P13646-3;CON__ENSEMBL:ENSP00000377550;P13646;CON__P13646-1;P13646-2;K7EMD9;J3QR55;K7EQH6;Q9C075;CON__Q9C075	K7ERE3;P13646-3;CON__ENSEMBL:ENSP00000377550;P13646;CON__P13646-1;P13646-2;K7EMD9	8;8;8;8;7;6;5;1;1;1;1	1;1;1;1;1;1;1;0;0;0;0	0;0;0;0;0;0;0;0;0;0;0	Keratin, type I cytoskeletal 13	KRT13	>tr|K7ERE3|K7ERE3_HUMAN Keratin, type I cytoskeletal 13 OS=Homo sapiens GN=KRT13 PE=1 SV=1;>sp|P13646-3|K1C13_HUMAN Isoform 3 of Keratin, type I cytoskeletal 13 OS=Homo sapiens GN=KRT13;>ENSEMBL:ENSP00000377550 Tax_Id=9606 Gene_Symbol=KRT13 46 kDa protein;	11	8	1	0	6	7	5	7	7	7	1	1	1	1	1	1	0	0	0	0	0	0	14.9	2.2	0	45.26	415	415;420;420;458;458;355;165;149;162;422;422	4.09		1	8	6	2	5					6	4	4
O76013-2;O76013;CON__O76013;O76015;CON__O76015;O76014;CON__O76014	O76013-2;O76013;CON__O76013;O76015;CON__O76015	5;5;5;3;3;2;2	1;1;1;0;0;0;0	1;1;1;0;0;0;0	Keratin, type I cuticular Ha6;Keratin, type I cuticular Ha8	KRT36;KRT38	>sp|O76013-2|KRT36_HUMAN Isoform 2 of Keratin, type I cuticular Ha6 OS=Homo sapiens GN=KRT36;>sp|O76013|KRT36_HUMAN Keratin, type I cuticular Ha6 OS=Homo sapiens GN=KRT36 PE=1 SV=1;>O76013 SWISS-PROT:O76013 Keratin, type I cuticular HA6 (Hair keratin, type	7	5	1	1	1	2	1	1	5	5	0	0	0	0	1	1	0	0	0	0	1	1	11	2.2	2.2	47.484	417	417;467;467;456;456;449;471	5.5					2	2
O95678;CON__O95678;CON__Q8VED5;H0YIN9;H0YI76	O95678;CON__O95678;CON__Q8VED5	6;6;4;1;1	2;2;0;0;0	2;2;0;0;0	Keratin, type II cytoskeletal 75	KRT75	>sp|O95678|K2C75_HUMAN Keratin, type II cytoskeletal 75 OS=Homo sapiens GN=KRT75 PE=1 SV=2;>O95678 SWISS-PROT:O95678 Tax_Id=9606 Gene_Symbol=KRT75 Keratin, type II cytoskeletal 75;>Q8VED5 TREMBL:Q8VED5 Tax_Id=10090 Gene_Symbol=Krt79 Keratin 79	5	6	2	2	4	4	4	5	6	5	0	0	0	1	2	1	0	0	0	1	2	1	7.3	2.2	2.2	59.56	551	551;551;531;196;201	3		3	1	1	1
CON__P00735;E9PIT3;P00734	CON__P00735;E9PIT3;P00734	2;1;1	2;1;1	2;1;1	Prothrombin;Activation peptide fragment 1;Activation peptide fragment 2;Thrombin light chain;Thrombin heavy chain	F2	>P00735 SWISS-PROT:P00735 (Bos taurus) Prothrombin precursor (Fragment);>tr|E9PIT3|E9PIT3_HUMAN Thrombin light chain OS=Homo sapiens GN=F2 PE=3 SV=1;>sp|P00734|THRB_HUMAN Prothrombin OS=Homo sapiens GN=F2 PE=1 SV=2	3	2	2	2	2	2	2	2	2	2	2	2	2	2	2	2	2	2	2	2	2	2	4.2	4.2	4.2	70.505	625	625;583;622	7.65						4	6		6	1	3	2	3
CON__P00761	CON__P00761	4	4	4			>P00761 SWISS-PROT:P00761|TRYP_PIG Trypsin - Sus scrofa (Pig).	1	4	4	4	4	4	4	4	4	4	4	4	4	4	4	4	4	4	4	4	4	4	25.1	25.1	25.1	24.409	231	231	5.16		12	11	8	8	7	8	13		3	13	14	10
CON__P01966;P02008	CON__P01966	7;1	7;1	3;0			>P01966 SWISS-PROT:P01966 (Bos taurus) Hemoglobin subunit alpha	2	7	7	3	7	7	7	7	7	7	7	7	7	7	7	7	3	3	3	3	3	3	58.5	58.5	34.5	15.184	142	142;142	5.76	13	11	12	17	4	1	13	22	6	20	18	19	19
P02533;CON__P02533;CON__Q6IFX2;K7ENV3	P02533;CON__P02533;CON__Q6IFX2	12;12;7;1	3;3;1;1	2;2;1;0	Keratin, type I cytoskeletal 14	KRT14	>sp|P02533|K1C14_HUMAN Keratin, type I cytoskeletal 14 OS=Homo sapiens GN=KRT14 PE=1 SV=4;>P02533 SWISS-PROT:P02533 Tax_Id=9606 Gene_Symbol=KRT14 Keratin, type I cytoskeletal 14;>Q6IFX2 SWISS-PROT:Q6IFX2 Tax_Id=10090 Gene_Symbol=Krt42 Keratin, type I cytos	4	12	3	2	8	9	8	8	11	9	1	1	1	0	3	1	1	1	1	0	2	1	21.8	7.4	5.1	51.561	472	472;472;452;48	3.14		4	2					1			1	1	1
P02538;CON__P02538;P48668;CON__P48668;CON__P04259	P02538;CON__P02538;P48668;CON__P48668;CON__P04259	6;6;5;5;5	1;1;0;0;0	1;1;0;0;0	Keratin, type II cytoskeletal 6A;Keratin, type II cytoskeletal 6C	KRT6A;KRT6C	>sp|P02538|K2C6A_HUMAN Keratin, type II cytoskeletal 6A OS=Homo sapiens GN=KRT6A PE=1 SV=3;>P02538 SWISS-PROT:P02538 Tax_Id=9606 Gene_Symbol=KRT6A Keratin, type II cytoskeletal 6A;>sp|P48668|K2C6C_HUMAN Keratin, type II cytoskeletal 6C OS=Homo sapiens GN=K	5	6	1	1	6	6	6	5	6	6	1	1	1	0	1	1	1	1	1	0	1	1	8.3	1.8	1.8	60.044	564	564;564;564;564;564	4			2	4	2						1	3	2
CON__P02769;H0YA55;P02768;CON__P02768-1;P02768-2;C9JKR2;D6RHD5;B7WNR0;H7C013	CON__P02769	33;5;5;5;4;4;4;4;1	33;5;5;5;4;4;4;4;1	33;5;5;5;4;4;4;4;1			>P02769 SWISS-PROT:P02769 (Bos taurus) Bovine serum albumin precursor	9	33	33	33	33	33	30	30	32	33	33	33	30	30	32	33	33	33	30	30	32	33	54.9	54.9	54.9	69.293	607	607;454;609;609;417;417;459;494;197	5.39	41	71	32	25	46	60	69	70	56	4	80	78	75
P04264;CON__P04264	P04264;CON__P04264	17;17	17;17	10;10	Keratin, type II cytoskeletal 1	KRT1	>sp|P04264|K2C1_HUMAN Keratin, type II cytoskeletal 1 OS=Homo sapiens GN=KRT1 PE=1 SV=6;>P04264 SWISS-PROT:P04264 Tax_Id=9606 Gene_Symbol=KRT1 Keratin, type II cytoskeletal 1	2	17	17	10	15	16	16	15	17	17	15	16	16	15	17	17	8	9	9	8	10	10	30.7	30.7	19.6	66.038	644	644;644	4.44	17	40	12	15	34	27	19	3	7	5	30	31	31
CON__P05784	CON__P05784	12	1	1			>P05784 SWISS-PROT:P05784 Tax_Id=10090 Gene_Symbol=Krt18 Keratin, type I cytoskeletal 18	1	12	1	1	12	12	11	12	11	12	1	1	0	1	0	1	1	1	0	1	0	1	22.9	5.4	5.4	47.538	423	423	7							4				1	1
P05787;CON__P05787;P05787-2;F8VUG2;F8W1U3;CON__H-INV:HIT000292931;F8VRG4;F8VP67;CON__Q9H552;F8W0C6;F8VQY3;P08729;CON__Q3KNV1;CON__P08729;CON__P07744;Q9NSB2;CON__Q9NSB2;CON__Q6ISB0;H0YIB2;CON__H-INV:HIT000016045;CON__REFSEQ:XP_092267;Q86Y46-2;Q14CN4-3;Q14CN4-2;Q14CN4;CON__Q14CN4-1;CON__Q6IME9;Q7RTS7;CON__Q7RTS7;Q86Y46;CON__Q32MB2;F8W1S1;H0YHD9;B4DIR1;K7ELP4;F8VS61;K7EJU1;K7EKH9;Q8N1N4-2;P14136-3;B…	P05787;CON__P05787;P05787-2;F8VUG2	29;29;29;16;14;13;11;8;6;3;3;3;3;3;3;3;3;3;2;2;2;2;2;2;2;2;2;2;2;2;2;2;1;1;1;1;1;1;1;1;1;1;1;1;1;1;1;1;1;1	29;29;29;16;14;13;11;8;6;3;3;3;3;3;3;3;3;3;2;2;2;2;2;2;2;2;2;2;2;2;2;2;1;1;1;1;1;1;1;1;1;1;1;1;1;1;1;1;1;1	25;25;25;13;11;11;8;8;5;0;3;0;0;0;0;0;0;0;2;2;2;0;0;0;0;0;0;0;0;0;0;0;0;0;0;0;0;0;0;0;0;0;0;0;0;0;0;0;0;0	Keratin, type II cytoskeletal 8	KRT8	>sp|P05787|K2C8_HUMAN Keratin, type II cytoskeletal 8 OS=Homo sapiens GN=KRT8 PE=1 SV=7;>P05787 SWISS-PROT:P05787 Tax_Id=9606 Gene_Symbol=KRT8 Keratin, type II cytoskeletal 8;>sp|P05787-2|K2C8_HUMAN Isoform 2 of Keratin, type II cytoskeletal 8 OS=Homo sapi	50	29	29	25	29	28	24	25	24	27	29	28	24	25	24	27	25	24	20	21	20	23	67.1	67.1	61.9	53.704	483	483;483;511;273;289;443;177;113;499;178;180;469;469;469;525;600;600;600;83;99;213;381;469;510;511;511;520;529;529;540;540;543;143;179;189;248;248;261;410;431;431;432;438;466;500;520;521;521;534;594	3.98	44	199	174	125	51	42	69	28	27	17	135	134	128
H0Y8D1;Q8NHM4;P07478;P07477;CON__P07477;E7EQ64	H0Y8D1;Q8NHM4;P07478;P07477;CON__P07477;E7EQ64	1;1;1;1;1;1	1;1;1;1;1;1	1;1;1;1;1;1	Putative trypsin-6;Trypsin-2;Trypsin-1;Alpha-trypsin chain 1;Alpha-trypsin chain 2	PRSS1;TRY6;PRSS2	>tr|H0Y8D1|H0Y8D1_HUMAN Trypsin-1 (Fragment) OS=Homo sapiens GN=PRSS1 PE=3 SV=1;>sp|Q8NHM4|TRY6_HUMAN Putative trypsin-6 OS=Homo sapiens GN=PRSS3P2 PE=5 SV=2;>sp|P07478|TRY2_HUMAN Trypsin-2 OS=Homo sapiens GN=PRSS2 PE=1 SV=1;>sp|P07477|TRY1_HUMAN Trypsin-1	6	1	1	1	1	1	1	1	1	1	1	1	1	1	1	1	1	1	1	1	1	1	14.1	14.1	14.1	15.421	142	142;247;247;247;247;261	2.33		6	3								2	2	1
CON__P08727;P08727;C9JM50;K7EMS3;CON__P19001;C9JTG5;Q8N1A0-2;Q8N1A0;CON__Q8N1A0;CON__A2AB72;Q99456;CON__Q99456	CON__P08727;P08727;C9JM50	27;26;15;10;9;2;1;1;1;1;1;1	25;24;13;10;7;2;1;1;1;0;1;1	16;15;6;5;2;0;0;0;0;0;0;0	Keratin, type I cytoskeletal 19	KRT19	>P08727 SWISS-PROT:P08727 Tax_Id=9606 Gene_Symbol=KRT19 Keratin, type I cytoskeletal 19;>sp|P08727|K1C19_HUMAN Keratin, type I cytoskeletal 19 OS=Homo sapiens GN=KRT19 PE=1 SV=4;>tr|C9JM50|C9JM50_HUMAN Keratin, type I cytoskeletal 19 (Fragment) OS=Homo sap	12	27	25	16	26	26	26	25	24	26	24	24	24	23	22	24	16	16	15	14	14	16	70	66	52.5	44.091	400	400;400;196;181;403;220;255;295;295;453;494;494	3.7	37	104	59	25	43	20	26	8	6	9	59	57	58
CON__P08730-1	CON__P08730-1	8	1	1			>P08730-1 SWISS-PROT:P08730-1 Tax_Id=10090 Gene_Symbol=Krt13 Isoform 1 of Keratin, type I cytoskeletal 13	1	8	1	1	6	6	5	8	6	7	0	0	0	1	0	1	0	0	0	1	0	1	14.9	2.7	2.7	47.754	437	437	1	2
P08779;CON__P08779	P08779;CON__P08779	10;10	1;1	1;1	Keratin, type I cytoskeletal 16	KRT16	>sp|P08779|K1C16_HUMAN Keratin, type I cytoskeletal 16 OS=Homo sapiens GN=KRT16 PE=1 SV=4;>P08779 SWISS-PROT:P08779 Tax_Id=9606 Gene_Symbol=KRT16 Keratin, type I cytoskeletal 16	2	10	1	1	7	6	8	8	7	6	0	0	1	0	0	0	0	0	1	0	0	0	16.9	3	3	51.267	473	473;473	3			1										1
CON__P12763	CON__P12763	7	7	7			>P12763 SWISS-PROT:P12763 (Bos taurus) Alpha-2-HS-glycoprotein precursor	1	7	7	7	7	6	6	5	7	6	7	6	6	5	7	6	7	6	6	5	7	6	33.4	33.4	33.4	38.418	359	359	4.95	16	7	9	5	2	6	16	11	2	5	13	15	13
P13645;CON__P13645;CON__P02535-1;Q7Z3Y7;CON__Q148H6;CON__Q7Z3Y7;Q2M2I5;CON__Q2M2I5;Q7Z3Z0;CON__Q7Z3Z0	P13645;CON__P13645	14;14;5;2;2;2;2;2;1;1	12;12;4;1;1;1;1;1;1;1	9;9;1;0;0;0;0;0;0;0	Keratin, type I cytoskeletal 10	KRT10	>sp|P13645|K1C10_HUMAN Keratin, type I cytoskeletal 10 OS=Homo sapiens GN=KRT10 PE=1 SV=6;>P13645 SWISS-PROT:P13645 Tax_Id=9606 Gene_Symbol=KRT10 Keratin, type I cytoskeletal 10	10	14	12	9	12	13	11	12	14	13	10	11	9	10	12	11	7	8	7	7	9	8	25.3	22.9	19.3	58.826	584	584;593;570;464;464;486;525;525;450;450	2.94	15	44	20	6	4			6	4		15	18	14
CON__P15497;F8W696;P02647	CON__P15497	11;1;1	11;1;1	11;1;1			>P15497 SWISS-PROT:P15497 (Bos taurus) Apolipoprotein A-I precursor	3	11	11	11	11	11	11	11	11	10	11	11	11	11	11	10	11	11	11	11	11	10	44.2	44.2	44.2	30.276	265	265;245;267	4.06	6	32	12	6	11		3	6	11		14	14	13
CON__P34955	CON__P34955	8	8	8			>P34955 SWISS-PROT:P34955 (Bos taurus) Alpha-1-antiproteinase precursor	1	8	8	8	6	8	7	7	7	7	6	8	7	7	7	7	6	8	7	7	7	7	21.9	21.9	21.9	46.103	416	416	4.28		15	14	17	10	4	4	7		1	10	11	11
P35527;CON__P35527;K7EQQ3	P35527;CON__P35527;K7EQQ3	15;15;8	14;14;8	14;14;8	Keratin, type I cytoskeletal 9	KRT9	>sp|P35527|K1C9_HUMAN Keratin, type I cytoskeletal 9 OS=Homo sapiens GN=KRT9 PE=1 SV=3;>P35527 SWISS-PROT:P35527 Tax_Id=9606 Gene_Symbol=KRT9 Keratin, type I cytoskeletal 9;>tr|K7EQQ3|K7EQQ3_HUMAN Keratin, type I cytoskeletal 9 OS=Homo sapiens GN=KRT9 PE=1	3	15	14	14	13	12	11	11	13	14	12	11	10	10	12	13	12	11	10	10	12	13	30.7	29.5	29.5	62.064	623	623;623;390	2.54	16	46	9	8	3		1	4			19	13	12
P35908;CON__P35908;CON__Q6NXH9;CON__Q6IFZ6;Q7Z794;CON__Q7Z794	P35908;CON__P35908	16;16;3;3;3;3	12;12;0;0;0;0	9;9;0;0;0;0	Keratin, type II cytoskeletal 2 epidermal	KRT2	>sp|P35908|K22E_HUMAN Keratin, type II cytoskeletal 2 epidermal OS=Homo sapiens GN=KRT2 PE=1 SV=2;>P35908 SWISS-PROT:P35908 Tax_Id=9606 Gene_Symbol=KRT2 Keratin, type II cytoskeletal 2 epidermal	6	16	12	9	12	13	14	14	13	14	8	9	10	10	9	10	6	7	8	7	7	8	26.9	22.4	16.9	65.432	639	639;645;539;572;578;578	3.84		25	12	33	27	9					18	17	18
CON__P41361;P01008	CON__P41361;P01008	3;2	3;2	3;2	Antithrombin-III	SERPINC1	>P41361 SWISS-PROT:P41361 (Bos taurus) Antithrombin-III precursor;>sp|P01008|ANT3_HUMAN Antithrombin-III OS=Homo sapiens GN=SERPINC1 PE=1 SV=1	2	3	3	3	2	3	3	3	3	3	2	3	3	3	3	3	2	3	3	3	3	3	7.1	7.1	7.1	52.347	465	465;464	6.07				5	5	5	7	5			3	4	3
CON__P50448	CON__P50448	3	3	3			>P50448 SWISS-PROT:P50448 (Bos taurus) Factor XIIa inhibitor precursor	1	3	3	3	3	3	1	3	1	1	3	3	1	3	1	1	3	3	1	3	1	1	7.9	7.9	7.9	51.723	468	468	7.54				1	2	2	2	1		5	4	3	1
P60369;P60413;CON__P60413;P60368;P60410;P60370;P60331;P60411;P60409-2;P60409;P60372	P60369;P60413;CON__P60413;P60368;P60410;P60370;P60331;P60411;P60409-2;P60409;P60372	1;1;1;1;1;1;1;1;1;1;1	1;1;1;1;1;1;1;1;1;1;1	1;1;1;1;1;1;1;1;1;1;1	Keratin-associated protein 10-3;Keratin-associated protein 10-12;Keratin-associated protein 10-2;Keratin-associated protein 10-8;Keratin-associated protein 10-5;Keratin-associated protein 10-1;Keratin-associated protein 10-9;Keratin-associated protein 10-7;Keratin-associated protein 10-4	KRTAP10-3;KRTAP10-12;KRTAP10-2;KRTAP10-8;KRTAP10-5;KRTAP10-1;KRTAP10-9;KRTAP10-7;KRTAP10-4	>sp|P60369|KR103_HUMAN Keratin-associated protein 10-3 OS=Homo sapiens GN=KRTAP10-3 PE=1 SV=2;>sp|P60413|KR10C_HUMAN Keratin-associated protein 10-12 OS=Homo sapiens GN=KRTAP10-12 PE=1 SV=1;>P60413 SWISS-PROT:P60413 Tax_Id=9606 Gene_Symbol=KRTAP10-12 Kerat	11	1	1	1	0	0	0	0	1	1	0	0	0	0	1	1	0	0	0	0	1	1	4.5	4.5	4.5	22.348	221	221;245;245;255;259;271;282;292;370;375;401	7.5							2	2
P60709;CON__P60712;G5E9R0;E7EVS6;P63267-2;C9JZR7;C9JUM1;C9JTX5;F8WCH0	P60709;CON__P60712	19;19;7;7;7;6;5;4;2	1;1;1;1;0;1;0;1;0	1;1;1;1;0;1;0;1;0	Actin, cytoplasmic 1;Actin, cytoplasmic 1, N-terminally processed	ACTB	>sp|P60709|ACTB_HUMAN Actin, cytoplasmic 1 OS=Homo sapiens GN=ACTB PE=1 SV=1;>P60712 SWISS-PROT:P60712 (Bos taurus) Actin, cytoplasmic 1	9	19	1	1	19	19	19	19	19	19	1	1	1	1	1	1	1	1	1	1	1	1	67.5	4.5	4.5	41.736	375	375;375;125;163;333;102;99;80;52	1.72	10	21	1								5	6	5
P78386;CON__P78386;F5GYI5	P78386;CON__P78386	11;11;4	10;10;4	3;3;1	Keratin, type II cuticular Hb5	KRT85	>sp|P78386|KRT85_HUMAN Keratin, type II cuticular Hb5 OS=Homo sapiens GN=KRT85 PE=1 SV=1;>P78386 SWISS-PROT:P78386 Keratin, type II cuticular Hb5 (Hair keratin, type II Hb5) - Homo sapiens (Human).	3	11	10	3	3	2	2	3	11	10	2	1	1	2	10	9	0	0	0	0	3	2	20.5	19.1	5.9	55.802	507	507;507;295	4.72	2	8	10	4	7	10	7	3	2		3	2	1
CON__Q03247	CON__Q03247	5	2	2			>Q03247 SWISS-PROT:Q03247 (Bos taurus) Apolipoprotein E precursor	1	5	2	2	5	5	5	5	5	5	2	2	2	2	2	2	2	2	2	2	2	2	17.4	8.2	8.2	35.979	316	316	5.53				4	5		6				3	2	2
Q04695;CON__Q04695;K7EPJ9;K7ESE1	Q04695;CON__Q04695	13;13;4;2	2;2;1;0	1;1;1;0	Keratin, type I cytoskeletal 17	KRT17	>sp|Q04695|K1C17_HUMAN Keratin, type I cytoskeletal 17 OS=Homo sapiens GN=KRT17 PE=1 SV=2;>Q04695 SWISS-PROT:Q04695 Tax_Id=9606 Gene_Symbol=KRT17 Keratin, type I cytoskeletal 17	4	13	2	1	12	12	11	11	12	12	2	2	2	1	2	2	1	1	1	1	1	1	23.1	4.6	2.5	48.105	432	432;432;231;95	3.75		3	5	6	6						4	3	4
CON__Q0IIK2;CON__Q29443;P02788-2;E7EQB2;E7ER44;P02788;C9JVG0;CON__Q2HJF0	CON__Q0IIK2;CON__Q29443	32;31;2;2;2;2;1;1	32;31;2;2;2;2;1;1	31;30;2;2;2;2;0;1			>Q0IIK2 TREMBL:Q0IIK2 (Bos taurus) Transferrin;>Q29443 SWISS-PROT:Q29443 Serotransferrin - Bos taurus (Bovine).	8	32	32	31	29	28	30	31	29	28	29	28	30	31	29	28	29	28	29	30	29	27	57.5	57.5	56.4	77.738	704	704;685;666;696;708;710;134;622	3.86	37	69	65	47	46	25	32	17	1		58	61	60
Q14525;CON__Q14525;O76009;CON__O76009;CON__Q6NTB9;CON__Q497I4;CON__Q92764;C4AM86;Q14532;CON__Q14532;Q92764;G3V1C2	Q14525;CON__Q14525;O76009;CON__O76009;CON__Q6NTB9;CON__Q497I4	8;8;6;6;5;5;3;3;3;3;3;2	1;1;0;0;0;0;0;0;0;0;0;0	1;1;0;0;0;0;0;0;0;0;0;0	Keratin, type I cuticular Ha3-II;Keratin, type I cuticular Ha3-I	KRT33B;KRT33A	>sp|Q14525|KT33B_HUMAN Keratin, type I cuticular Ha3-II OS=Homo sapiens GN=KRT33B PE=2 SV=3;>Q14525 SWISS-PROT:Q14525 Keratin, type I cuticular HA3-II (Hair keratin, type I HA3-II);>sp|O76009|KT33A_HUMAN Keratin, type I cuticular Ha3-I OS=Homo sapiens GN=K	12	8	1	1	2	4	3	3	8	8	0	0	0	0	1	1	0	0	0	0	1	1	20.8	2.7	2.7	46.213	404	404;404;404;404;404;455;425;425;448;448;455;236	2		2
Q15323;CON__Q9UE12;CON__Q15323;CON__Q9D646;CON__O76011;O76011;CON__Q8IUT8	Q15323;CON__Q9UE12;CON__Q15323;CON__Q9D646;CON__O76011;O76011;CON__Q8IUT8	9;9;9;6;5;5;5	8;8;8;6;5;5;5	0;0;0;0;0;0;0	Keratin, type I cuticular Ha1;Keratin, type I cuticular Ha4	KRT31;KRT34	>sp|Q15323|K1H1_HUMAN Keratin, type I cuticular Ha1 OS=Homo sapiens GN=KRT31 PE=2 SV=3;>Q9UE12 TREMBL:Q9UE12 Type I hair keratin 1 - Homo sapiens (Human).;>Q15323 SWISS-PROT:Q15323 Keratin, type I cuticular HA1 (Hair keratin, type I HA1);>Q9D646 TREMBL:Q9D	7	9	8	0	2	5	3	3	9	9	1	4	2	2	8	8	0	0	0	0	0	0	23.3	21.6	0	47.237	416	416;416;416;392;394;436;436	2.89	7	16	9	8	4	3					2	6	3
CON__Q28107;P12259	CON__Q28107	12;2	12;2	12;2			>Q28107 SWISS-PROT:Q28107 (Bos taurus) Coagulation factor V precursor	2	12	12	12	9	8	9	12	6	9	9	8	9	12	6	9	9	8	9	12	6	9	6.3	6.3	6.3	248.98	2211	2211;2224	5.25	12		14	9	1	6	3		1	17	12	9	11
P07996;CON__Q28194	P07996;CON__Q28194	6;6	6;6	6;6	Thrombospondin-1	THBS1	>sp|P07996|TSP1_HUMAN Thrombospondin-1 OS=Homo sapiens GN=THBS1 PE=1 SV=2;>Q28194 TREMBL:Q28194 (Bos taurus) Thrombospondin-1	2	6	6	6	5	6	4	5	3	5	5	6	4	5	3	5	5	6	4	5	3	5	5.9	5.9	5.9	129.38	1170	1170;1170	6.48				1	13	15	4	5	2	4	8	10	7
CON__Q2UVX4;P01024	CON__Q2UVX4;P01024	2;1	2;1	2;1	Complement C3;Complement C3 beta chain;Complement C3 alpha chain;C3a anaphylatoxin;Acylation stimulating protein;Complement C3b alpha chain;Complement C3c alpha chain fragment 1;Complement C3dg fragment;Complement C3g fragment;Complement C3d fragment;Complement C3f fragment;Complement C3c alpha chain fragment 2	C3	>Q2UVX4 SWISS-PROT:Q2UVX4 (Bos taurus) Complement C3 precursor;>sp|P01024|CO3_HUMAN Complement C3 OS=Homo sapiens GN=C3 PE=1 SV=2	2	2	2	2	2	2	2	2	0	0	2	2	2	2	0	0	2	2	2	2	0	0	1.5	1.5	1.5	187.37	1662	1662;1663	3.22	4				5						2	3	2
CON__Q3SX09;E9PFT6;P68871;P02042	CON__Q3SX09	8;2;2;2	8;2;2;2	6;1;1;1			>Q3SX09 TREMBL:Q3SX09 (Bos taurus) similar to HBG protein	4	8	8	6	7	5	7	7	7	7	7	5	7	7	7	7	5	4	6	6	5	6	49.3	49.3	38.3	22.06	201	201;141;147;147	5.99		10	17	14	5	2	2	9	13	16	12	8	20
CON__Q3SX14;Q5T0I1	CON__Q3SX14	15;5	1;0	1;0			>Q3SX14 TREMBL:Q3SX14 (Bos taurus) Similar to Gelsolin	2	15	1	1	13	13	15	14	13	14	0	0	1	1	0	1	0	0	1	1	0	1	17.7	1	1	85.686	781	781;228	4.67				1	2								1
P07951-3;Q5TCU3;P07951-2;P07951;CON__Q3SX28;Q5TCU8	P07951-3;Q5TCU3;P07951-2;P07951;CON__Q3SX28;Q5TCU8	6;6;6;6;6;6	1;1;1;1;1;1	1;1;1;1;1;1	Tropomyosin beta chain	TPM2	>sp|P07951-3|TPM2_HUMAN Isoform 3 of Tropomyosin beta chain OS=Homo sapiens GN=TPM2;>tr|Q5TCU3|Q5TCU3_HUMAN Tropomyosin beta chain OS=Homo sapiens GN=TPM2 PE=1 SV=1;>sp|P07951-2|TPM2_HUMAN Isoform 2 of Tropomyosin beta chain OS=Homo sapiens GN=TPM2;>sp|P07	6	6	1	1	6	6	5	6	6	6	1	1	1	1	1	1	1	1	1	1	1	1	16.9	3.6	3.6	28.684	248	248;284;284;284;284;322	2.27		8	3								1	2	1
CON__Q3SZR3	CON__Q3SZR3	4	4	4			>Q3SZR3 SWISS-PROT:Q3SZR3 (Bos taurus) Alpha-1-acid glycoprotein precursor	1	4	4	4	4	4	4	4	4	4	4	4	4	4	4	4	4	4	4	4	4	4	22.3	22.3	22.3	23.182	202	202	5.38		6	4	3	4	12	4		6		7	6	6
CON__Q3ZBD7	CON__Q3ZBD7	8	2	2			>Q3ZBD7 SWISS-PROT:Q3ZBD7 (Bos taurus) Glucose-6-phosphate isomerase	1	8	2	2	8	8	8	8	8	7	2	2	2	2	2	1	2	2	2	2	2	1	17.1	4.8	4.8	62.87	557	557	2.6		7	7	1							4	3	2
CON__Q3ZBS7	CON__Q3ZBS7	8	8	5			>Q3ZBS7 TREMBL:Q3ZBS7 (Bos taurus) Vitronectin	1	8	8	5	7	7	7	8	7	7	7	7	7	8	7	7	4	4	4	5	4	4	18.4	18.4	11.8	54.099	484	484	5.42	6	12	7	11	6	16	10	6	11	5	15	14	15
CON__Q61726	CON__Q61726	8	2	1			>Q61726 TREMBL:Q61726 Tax_Id=10090 Gene_Symbol=5430421N21Rik Keratin type II	1	8	2	1	3	2	2	3	8	8	0	0	0	0	2	2	0	0	0	0	1	1	14.2	5.4	2.5	52.809	479	479	2.4		3	2
Q6KB66-2;Q6KB66;CON__Q6KB66-1;Q6KB66-3;CON__Q0VBK2	Q6KB66-2;Q6KB66;CON__Q6KB66-1;Q6KB66-3	6;6;6;4;1	6;6;6;4;1	6;6;6;4;1	Keratin, type II cytoskeletal 80	KRT80	>sp|Q6KB66-2|K2C80_HUMAN Isoform 2 of Keratin, type II cytoskeletal 80 OS=Homo sapiens GN=KRT80;>sp|Q6KB66|K2C80_HUMAN Keratin, type II cytoskeletal 80 OS=Homo sapiens GN=KRT80 PE=1 SV=2;>Q6KB66-1 SWISS-PROT:Q6KB66-1 Tax_Id=9606 Gene_Symbol=KRT80 Isoform 1	5	6	6	6	5	6	6	6	6	4	5	6	6	6	6	4	5	6	6	6	6	4	16.4	16.4	16.4	47.241	422	422;452;452;487;452	5.84	1	5		4	11	14	15	1	6		10	11	12
P78385;CON__Q6NT21;Q14533;CON__Q14533;CON__P78385	P78385;CON__Q6NT21;Q14533;CON__Q14533;CON__P78385	8;8;7;7;6	3;3;2;2;1	1;1;0;0;0	Keratin, type II cuticular Hb3;Keratin, type II cuticular Hb1	KRT83;KRT81	>sp|P78385|KRT83_HUMAN Keratin, type II cuticular Hb3 OS=Homo sapiens GN=KRT83 PE=1 SV=2;>Q6NT21 TREMBL:Q6NT21 Keratin, hair, basic, 3 - Homo sapiens (Human).;>sp|Q14533|KRT81_HUMAN Keratin, type II cuticular Hb1 OS=Homo sapiens GN=KRT81 PE=1 SV=3;>Q14533	5	8	3	1	2	2	2	2	8	8	1	1	1	1	3	3	0	0	0	0	1	1	15	5.7	2.4	54.195	493	493;493;505;505;493	4.42		2	5	2	5	3	2				1	1	1
Q7Z3Y8;CON__Q7Z3Y8	Q7Z3Y8;CON__Q7Z3Y8	2;2	1;1	1;1	Keratin, type I cytoskeletal 27	KRT27	>sp|Q7Z3Y8|K1C27_HUMAN Keratin, type I cytoskeletal 27 OS=Homo sapiens GN=KRT27 PE=1 SV=2;>Q7Z3Y8 SWISS-PROT:Q7Z3Y8 Tax_Id=9606 Gene_Symbol=KRT27 Keratin, type I cytoskeletal 27	2	2	1	1	2	2	2	2	2	2	1	1	1	1	1	1	1	1	1	1	1	1	3.9	2	2	49.822	459	459;459	3.5			6	6							2	2	2
Q7Z3Y9;CON__Q7Z3Y9	Q7Z3Y9;CON__Q7Z3Y9	2;2	1;1	1;1	Keratin, type I cytoskeletal 26	KRT26	>sp|Q7Z3Y9|K1C26_HUMAN Keratin, type I cytoskeletal 26 OS=Homo sapiens GN=KRT26 PE=1 SV=2;>Q7Z3Y9 SWISS-PROT:Q7Z3Y9 Tax_Id=9606 Gene_Symbol=KRT26 Keratin, type I cytoskeletal 26	2	2	1	1	1	1	1	2	2	2	0	0	0	1	1	1	0	0	0	1	1	1	5.1	3.2	3.2	51.91	468	468;468	3			3
Q86YZ3;CON__Q86YZ3	Q86YZ3;CON__Q86YZ3	1;1	1;1	1;1	Hornerin	HRNR	>sp|Q86YZ3|HORN_HUMAN Hornerin OS=Homo sapiens GN=HRNR PE=1 SV=2;>Q86YZ3 SWISS-PROT:Q86YZ3 Tax_Id=9606 Gene_Symbol=HRNR Hornerin	2	1	1	1	1	1	1	1	0	1	1	1	1	1	0	1	1	1	1	1	0	1	1.7	1.7	1.7	282.39	2850	2850;2850	1	5										1	1	1
Q9BYR2;Q9BQ66;Q9BYQ5;CON__Q9BYQ5;Q9BYR0;Q9BYQ9;Q9BYQ6;Q9BYQ8;CON__Q9BYQ8	Q9BYR2;Q9BQ66;Q9BYQ5;CON__Q9BYQ5;Q9BYR0	3;3;3;3;3;1;1;1;1	3;3;3;3;3;1;1;1;1	3;3;3;3;3;1;1;1;1	Keratin-associated protein 4-5;Keratin-associated protein 4-12;Keratin-associated protein 4-6;Keratin-associated protein 4-7	KRTAP4-5;KRTAP4-12;KRTAP4-6;KRTAP4-7	>sp|Q9BYR2|KRA45_HUMAN Keratin-associated protein 4-5 OS=Homo sapiens GN=KRTAP4-5 PE=2 SV=4;>sp|Q9BQ66|KR412_HUMAN Keratin-associated protein 4-12 OS=Homo sapiens GN=KRTAP4-12 PE=1 SV=1;>sp|Q9BYQ5|KRA46_HUMAN Keratin-associated protein 4-6 OS=Homo sapiens	9	3	3	3	0	1	1	0	3	3	0	1	1	0	3	3	0	1	1	0	3	3	10.5	10.5	10.5	19.363	181	181;201;205;205;210;185;195;210;210	5.44		2	4		2	2	1	3	2			1	1
Q9BYQ7;CON__Q9BYQ7	Q9BYQ7;CON__Q9BYQ7	1;1	1;1	1;1	Keratin-associated protein 4-1	KRTAP4-1	>sp|Q9BYQ7|KRA41_HUMAN Keratin-associated protein 4-1 OS=Homo sapiens GN=KRTAP4-1 PE=2 SV=3;>Q9BYQ7 SWISS-PROT:Q9BYQ7 Tax_Id=9606 Gene_Symbol=KRTAP4-1 Uncharacterized protein ENSP00000381489	2	1	1	1	0	0	0	0	1	1	0	0	0	0	1	1	0	0	0	0	1	1	13.7	13.7	13.7	15.241	146	146;146	2		2
Q9BYT5;F5H1T9;Q9BYU5;Q9BYR9;P0C7H8;CON__Q9BYR9;F5H6S0	Q9BYT5;F5H1T9;Q9BYU5;Q9BYR9;P0C7H8;CON__Q9BYR9;F5H6S0	3;3;3;3;3;3;3	3;3;3;3;3;3;3	3;3;3;3;3;3;3	Keratin-associated protein 2-2;Keratin-associated protein 2-1;Keratin-associated protein 2-4;Keratin-associated protein 2-3	KRTAP2-2;KRTAP2-1;KRTAP2-4;KRTAP2-3	>sp|Q9BYT5|KRA22_HUMAN Keratin-associated protein 2-2 OS=Homo sapiens GN=KRTAP2-2 PE=2 SV=3;>tr|F5H1T9|F5H1T9_HUMAN Keratin-associated protein 2-1 OS=Homo sapiens GN=KRTAP2-1 PE=4 SV=1;>sp|Q9BYU5|KRA21_HUMAN Keratin-associated protein 2-1 OS=Homo sapiens G	7	3	3	3	0	0	0	0	3	3	0	0	0	0	3	3	0	0	0	0	3	3	21.1	21.1	21.1	12.957	123	123;124;128;128;128;128;129	2.43		8	6
Q9NSB4;CON__Q9NSB4	Q9NSB4;CON__Q9NSB4	2;2	1;1	1;1	Keratin, type II cuticular Hb2	KRT82	>sp|Q9NSB4|KRT82_HUMAN Keratin, type II cuticular Hb2 OS=Homo sapiens GN=KRT82 PE=1 SV=3;>Q9NSB4 SWISS-PROT:Q9NSB4 Keratin, type II cuticular Hb2 (Hair keratin, type II Hb2) - Homo sapiens (Human).	2	2	1	1	0	0	0	0	2	2	0	0	0	0	1	1	0	0	0	0	1	1	3.5	1.9	1.9	56.652	513	513;513	3.5			2	2
CON__Q9TTE1;CON__A2I7N1;CON__A2I7N0;CON__REFSEQ:XP_001252647;CON__A2I7N3	CON__Q9TTE1;CON__A2I7N1;CON__A2I7N0	4;3;2;1;1	4;3;2;1;1	4;3;2;1;1			>Q9TTE1 SWISS-PROT:Q9TTE1 (Bos taurus) Endopin-1 precursor;>A2I7N1 TREMBL:A2I7N1 (Bos taurus) SERPINA3-5;>A2I7N0 TREMBL:A2I7N0;Q28922;Q3ZEJ6 (Bos taurus) SERPINA3-4	5	4	4	4	4	4	4	4	4	4	4	4	4	4	4	4	4	4	4	4	4	4	9.2	9.2	9.2	46.203	411	411;411;411;417;417	4.62		1	11	5	6	5	6				6	6	6
CON__REFSEQ:XP_986630;CON__A2A5Y0	CON__REFSEQ:XP_986630;CON__A2A5Y0	8;7	2;1	1;0			>REFSEQ:XP_986630 Tax_Id=10090 Gene_Symbol=Krt33b keratin complex 1, acidic, gene 3;>A2A5Y0 TREMBL:A2A5Y0 Tax_Id=10090 Gene_Symbol=Krt31 keratin complex 1, acidic, gene 1	2	8	2	1	2	3	2	2	8	8	0	0	0	0	2	2	0	0	0	0	1	1	17	4.8	2.3	53.728	476	476;416	2.2		4	1
D3DQ30;Q5SRH9-5;Q5SRH9-6;Q5SRH9-4;Q5SRH9;Q5SRH9-2;E9PHX9;U5GXS1;E9PAZ4;Q5SRH9-3	D3DQ30;Q5SRH9-5;Q5SRH9-6;Q5SRH9-4;Q5SRH9;Q5SRH9-2	3;3;3;3;3;2;1;1;1;1	3;3;3;3;3;2;1;1;1;1	3;3;3;3;3;2;1;1;1;1	Tetratricopeptide repeat protein 39A	TTC39A	>tr|D3DQ30|D3DQ30_HUMAN HCG40295, isoform CRA_d OS=Homo sapiens GN=TTC39A PE=4 SV=1;>sp|Q5SRH9-5|TT39A_HUMAN Isoform 5 of Tetratricopeptide repeat protein 39A OS=Homo sapiens GN=TTC39A;>sp|Q5SRH9-6|TT39A_HUMAN Isoform 6 of Tetratricopeptide repeat protein	10	3	3	3	2	2	2	2	3	2	2	2	2	2	3	2	2	2	2	2	3	2	6	6	6	63.18	550	550;577;578;581;613;221;112;188;279;420	5.36	1		1	6			1	5			2	2	3
K7EPL7;D3DUE4;Q6ZW76-2;Q6ZW76	K7EPL7;D3DUE4;Q6ZW76-2;Q6ZW76	2;2;2;2	2;2;2;2	2;2;2;2	Ankyrin repeat and SAM domain-containing protein 3	ANKS3	>tr|K7EPL7|K7EPL7_HUMAN Ankyrin repeat and SAM domain-containing protein 3 (Fragment) OS=Homo sapiens GN=ANKS3 PE=4 SV=1;>tr|D3DUE4|D3DUE4_HUMAN Ankyrin repeat and SAM domain-containing protein 3 OS=Homo sapiens GN=ANKS3 PE=4 SV=1;>sp|Q6ZW76-2|ANKS3_HUMAN	4	2	2	2	2	2	2	2	2	2	2	2	2	2	2	2	2	2	2	2	2	2	7.6	7.6	7.6	31.306	289	289;527;583;656	4.08	7						2	4			3	2	2
D3DWF9;Q96QU8	D3DWF9;Q96QU8	3;3	3;3	3;3	Exportin-6	XPO6	>tr|D3DWF9|D3DWF9_HUMAN Exportin 6, isoform CRA_a OS=Homo sapiens GN=XPO6 PE=1 SV=1;>sp|Q96QU8|XPO6_HUMAN Exportin-6 OS=Homo sapiens GN=XPO6 PE=1 SV=1	2	3	3	3	3	2	3	2	3	3	3	2	3	2	3	3	3	2	3	2	3	3	2.3	2.3	2.3	127.39	1111	1111;1125	6				7	6	3		1	6		4	4	6
F6U1T9;P63098;D3YTA9;H7BYZ3	F6U1T9;P63098;D3YTA9;H7BYZ3	6;6;6;5	6;6;6;5	6;6;6;5	Calcineurin subunit B type 1	PPP3R1	>tr|F6U1T9|F6U1T9_HUMAN Calcineurin subunit B type 1 OS=Homo sapiens GN=PPP3R1 PE=4 SV=1;>sp|P63098|CANB1_HUMAN Calcineurin subunit B type 1 OS=Homo sapiens GN=PPP3R1 PE=1 SV=2;>tr|D3YTA9|D3YTA9_HUMAN Calcineurin subunit B type 1 OS=Homo sapiens GN=PPP3R1	4	6	6	6	6	5	6	6	6	5	6	5	6	6	6	5	6	5	6	6	6	5	51.9	51.9	51.9	18.208	160	160;170;189;331	5	6	6	6	7	8	1	6	8	6		8	7	8
D3YTB1;P62910;F8W727;D3YTI8	D3YTB1;P62910;F8W727	8;8;8;1	8;8;8;1	8;8;8;1	60S ribosomal protein L32	RPL32	>tr|D3YTB1|D3YTB1_HUMAN 60S ribosomal protein L32 (Fragment) OS=Homo sapiens GN=RPL32 PE=1 SV=1;>sp|P62910|RL32_HUMAN 60S ribosomal protein L32 OS=Homo sapiens GN=RPL32 PE=1 SV=2;>tr|F8W727|F8W727_HUMAN 60S ribosomal protein L32 OS=Homo sapiens GN=RPL32 PE	4	8	8	8	8	8	8	8	8	8	8	8	8	8	8	8	8	8	8	8	8	8	51.1	51.1	51.1	15.616	133	133;135;153;62	6.74		13	11	21	15	6	19	44	35	16	32	25	31
H7C224;P51617-4;P51617-2;P51617-3;D3YTB5;P51617;H7C2I6;P51955-3;F8WAB6;P51955-2;B4DZU0;P51955-4;P51955	H7C224;P51617-4;P51617-2;P51617-3;D3YTB5;P51617;H7C2I6	5;5;5;5;5;5;3;1;1;1;1;1;1	5;5;5;5;5;5;3;1;1;1;1;1;1	5;5;5;5;5;5;3;1;1;1;1;1;1	Interleukin-1 receptor-associated kinase 1	IRAK1	>tr|H7C224|H7C224_HUMAN Interleukin-1 receptor-associated kinase 1 (Fragment) OS=Homo sapiens GN=IRAK1 PE=1 SV=1;>sp|P51617-4|IRAK1_HUMAN Isoform 4 of Interleukin-1 receptor-associated kinase 1 OS=Homo sapiens GN=IRAK1;>sp|P51617-2|IRAK1_HUMAN Isoform 2 of	13	5	5	5	4	4	4	2	3	3	4	4	4	2	3	3	4	4	4	2	3	3	14	14	14	42.111	392	392;633;682;693;708;712;276;326;339;384;402;437;445	4.4			10	13	8			4			7	6	8
Q9UBM1;D3YTC7;Q9UBM1-3;Q9UBM1-2	Q9UBM1;D3YTC7;Q9UBM1-3;Q9UBM1-2	1;1;1;1	1;1;1;1	1;1;1;1	Phosphatidylethanolamine N-methyltransferase	PEMT	>sp|Q9UBM1|PEMT_HUMAN Phosphatidylethanolamine N-methyltransferase OS=Homo sapiens GN=PEMT PE=2 SV=4;>tr|D3YTC7|D3YTC7_HUMAN Phosphatidylethanolamine N-methyltransferase OS=Homo sapiens GN=PEMT PE=4 SV=1;>sp|Q9UBM1-3|PEMT_HUMAN Isoform 3 of Phosphatidyleth	4	1	1	1	1	1	1	1	1	1	1	1	1	1	1	1	1	1	1	1	1	1	6.5	6.5	6.5	22.134	199	199;211;232;236	8.91								4	4	3	2	1	1
Q8N9T8;D3YTE0;H0YH26;H0YFD2	Q8N9T8;D3YTE0;H0YH26	3;3;2;1	3;3;2;1	3;3;2;1	Protein KRI1 homolog	KRI1	>sp|Q8N9T8|KRI1_HUMAN Protein KRI1 homolog OS=Homo sapiens GN=KRI1 PE=1 SV=3;>tr|D3YTE0|D3YTE0_HUMAN Protein KRI1 homolog OS=Homo sapiens GN=KRI1 PE=1 SV=1;>tr|H0YH26|H0YH26_HUMAN Protein KRI1 homolog (Fragment) OS=Homo sapiens GN=KRI1 PE=1 SV=1	4	3	3	3	3	3	1	3	2	3	3	3	1	3	2	3	3	3	1	3	2	3	5.1	5.1	5.1	82.597	703	703;705;194;190	1.94	1	15									4	3	1
F5H1L4;E7ENA2;Q9NNW7-2;D3YTF8;F5H2V0;D3YTF9;Q9NNW7;Q9NNW7-3;Q9NNW7-4;E7EWK1	F5H1L4;E7ENA2;Q9NNW7-2;D3YTF8;F5H2V0;D3YTF9;Q9NNW7;Q9NNW7-3;Q9NNW7-4;E7EWK1	9;9;9;9;9;9;9;8;5;5	8;8;8;8;8;8;8;8;5;4	8;8;8;8;8;8;8;8;5;4	Thioredoxin reductase 2, mitochondrial	TXNRD2	>tr|F5H1L4|F5H1L4_HUMAN Thioredoxin reductase 2, mitochondrial OS=Homo sapiens GN=TXNRD2 PE=1 SV=1;>tr|E7ENA2|E7ENA2_HUMAN Thioredoxin reductase 2, mitochondrial OS=Homo sapiens GN=TXNRD2 PE=1 SV=1;>sp|Q9NNW7-2|TRXR2_HUMAN Isoform 2 of Thioredoxin reductas	10	9	8	8	7	9	6	5	7	7	6	8	5	4	6	6	6	8	5	4	6	6	28.9	25.8	25.8	53.406	492	492;494;498;499;521;523;524;428;277;338	3.64		45	6			4	10	5		2	12	13	9
Q13557-8;Q13557-12;Q13557-9;Q13557-10;Q13557-5;D6R938;Q13557;Q13557-3;E9PBG7;Q13557-6;Q13557-4;Q13557-11;E9PF82;H0Y9C2;H0Y9J2;Q9UQM7;Q9UQM7-2;E9PBE8;E7EQE4;D6RHX9;D6RFJ0;E7ERS6;E7ETC9	Q13557-8;Q13557-12;Q13557-9;Q13557-10;Q13557-5;D6R938;Q13557;Q13557-3;E9PBG7;Q13557-6;Q13557-4;Q13557-11;E9PF82;H0Y9C2	13;13;13;13;13;13;13;13;13;13;13;13;13;7;6;3;3;2;2;1;1;1;1	13;13;13;13;13;13;13;13;13;13;13;13;13;7;6;3;3;2;2;1;1;1;1	9;9;9;9;9;9;9;9;9;9;9;9;9;5;5;0;0;0;0;0;0;0;0	Calcium/calmodulin-dependent protein kinase type II subunit delta	CAMK2D	>sp|Q13557-8|KCC2D_HUMAN Isoform Delta 6 of Calcium/calmodulin-dependent protein kinase type II subunit delta OS=Homo sapiens GN=CAMK2D;>sp|Q13557-12|KCC2D_HUMAN Isoform Delta 12 of Calcium/calmodulin-dependent protein kinase type II subunit delta OS=Homo	23	13	13	9	13	13	11	10	12	13	13	13	11	10	12	13	9	9	7	6	8	9	31	31	22.8	54.127	478	478;478;489;492;498;498;499;510;512;513;519;524;533;194;182;478;489;168;173;24;90;112;180	5.85		12	6	25	33	41	37	21	2	9	33	35	29
D6R9K1;D6RB31;D6RCP3;D6RIU2;D6RDP6;H0Y8T9;Q9NY35-3;D6RHU6;D6RDY1;D6RA76;Q9NY35-2;D6RC11;D6R9S8;D6RCE6;D6RFX6;D6RDI6;D6RCR8;Q9NY35;J3KQ67	D6R9K1;D6RB31;D6RCP3;D6RIU2;D6RDP6;H0Y8T9;Q9NY35-3;D6RHU6;D6RDY1;D6RA76;Q9NY35-2;D6RC11;D6R9S8;D6RCE6;D6RFX6;D6RDI6;D6RCR8;Q9NY35;J3KQ67	1;1;1;1;1;1;1;1;1;1;1;1;1;1;1;1;1;1;1	1;1;1;1;1;1;1;1;1;1;1;1;1;1;1;1;1;1;1	1;1;1;1;1;1;1;1;1;1;1;1;1;1;1;1;1;1;1	Claudin domain-containing protein 1	CLDND1	>tr|D6R9K1|D6R9K1_HUMAN Claudin domain-containing protein 1 OS=Homo sapiens GN=CLDND1 PE=4 SV=1;>tr|D6RB31|D6RB31_HUMAN Claudin domain-containing protein 1 (Fragment) OS=Homo sapiens GN=CLDND1 PE=4 SV=1;>tr|D6RCP3|D6RCP3_HUMAN Claudin domain-containing pro	19	1	1	1	1	1	1	1	1	1	1	1	1	1	1	1	1	1	1	1	1	1	17.2	17.2	17.2	9.6954	87	87;100;121;138;145;155;158;172;177;180;184;210;213;223;236;239;244;253;276	6.45					1	6	2	2			2	1	3
D6R9P3;D6RD18;Q99729-3;D6RBZ0;Q99729-2;Q99729-4;Q99729	D6R9P3;D6RD18;Q99729-3;D6RBZ0;Q99729-2;Q99729-4;Q99729	12;12;12;12;12;11;11	12;12;12;12;12;11;11	12;12;12;12;12;11;11	Heterogeneous nuclear ribonucleoprotein A/B	HNRNPAB	>tr|D6R9P3|D6R9P3_HUMAN Heterogeneous nuclear ribonucleoprotein A/B OS=Homo sapiens GN=HNRNPAB PE=1 SV=1;>tr|D6RD18|D6RD18_HUMAN Heterogeneous nuclear ribonucleoprotein A/B OS=Homo sapiens GN=HNRNPAB PE=1 SV=1;>sp|Q99729-3|ROAA_HUMAN Isoform 3 of Heterogen	7	12	12	12	12	11	10	10	12	11	12	11	10	10	12	11	12	11	10	10	12	11	28.9	28.9	28.9	30.302	280	280;283;285;327;332;286;332	6.59		5	19	23	16	14	14	26	21	27	30	26	27
D6R9S7;D6RHE3;D6RDB0;Q96GZ6-6;Q96GZ6-7;Q96GZ6-5;Q96GZ6-9;Q96GZ6-2;Q96GZ6;D6RDM3;D6RF72;D6R9M9;D6R9X6;Q96GZ6-8	D6R9S7;D6RHE3;D6RDB0;Q96GZ6-6;Q96GZ6-7;Q96GZ6-5;Q96GZ6-9;Q96GZ6-2;Q96GZ6;D6RDM3;D6RF72;D6R9M9;D6R9X6;Q96GZ6-8	2;2;2;2;2;2;2;2;2;1;1;1;1;1	2;2;2;2;2;2;2;2;2;1;1;1;1;1	2;2;2;2;2;2;2;2;2;1;1;1;1;1	Solute carrier family 41 member 3	SLC41A3	>tr|D6R9S7|D6R9S7_HUMAN Solute carrier family 41 member 3 (Fragment) OS=Homo sapiens GN=SLC41A3 PE=4 SV=1;>tr|D6RHE3|D6RHE3_HUMAN Solute carrier family 41 member 3 (Fragment) OS=Homo sapiens GN=SLC41A3 PE=4 SV=1;>tr|D6RDB0|D6RDB0_HUMAN Solute carrier famil	14	2	2	2	2	2	2	2	2	2	2	2	2	2	2	2	2	2	2	2	2	2	20.4	20.4	20.4	16.43	152	152;201;288;438;461;478;487;500;507;65;138;174;294;370	6	6								2	6	2	2	2
D6R9X2;E9PE34;F6UN30;E7EVH3;Q92576-2;Q92576	D6R9X2;E9PE34;F6UN30;E7EVH3;Q92576-2;Q92576	2;2;2;2;2;2	2;2;2;2;2;2	2;2;2;2;2;2	PHD finger protein 3	PHF3	>tr|D6R9X2|D6R9X2_HUMAN PHD finger protein 3 OS=Homo sapiens GN=PHF3 PE=1 SV=1;>tr|E9PE34|E9PE34_HUMAN PHD finger protein 3 (Fragment) OS=Homo sapiens GN=PHF3 PE=1 SV=1;>tr|F6UN30|F6UN30_HUMAN PHD finger protein 3 (Fragment) OS=Homo sapiens GN=PHF3 PE=1 SV	6	2	2	2	1	2	0	2	1	1	1	2	0	2	1	1	1	2	0	2	1	1	3	3	3	81.964	736	736;813;821;1072;1951;2039	2		7									1	2
D6R9Z7;P15954	D6R9Z7;P15954	2;2	2;2	2;2	Cytochrome c oxidase subunit 7C, mitochondrial	COX7C	>tr|D6R9Z7|D6R9Z7_HUMAN Cytochrome c oxidase subunit 7C, mitochondrial OS=Homo sapiens GN=COX7C PE=1 SV=1;>sp|P15954|COX7C_HUMAN Cytochrome c oxidase subunit 7C, mitochondrial OS=Homo sapiens GN=COX7C PE=1 SV=1	2	2	2	2	2	2	1	1	2	2	2	2	1	1	2	2	2	2	1	1	2	2	28.6	28.6	28.6	6.3824	56	56;63	4.45			3	7	8	2					4	4	3
D6RA57;Q96EY4;H0Y9X1;D6RE67;D6RC31	D6RA57;Q96EY4;H0Y9X1;D6RE67;D6RC31	2;2;2;1;1	2;2;2;1;1	2;2;2;1;1	Translation machinery-associated protein 16	TMA16	>tr|D6RA57|D6RA57_HUMAN Translation machinery-associated protein 16 OS=Homo sapiens GN=TMA16 PE=1 SV=1;>sp|Q96EY4|TMA16_HUMAN Translation machinery-associated protein 16 OS=Homo sapiens GN=TMA16 PE=1 SV=2;>tr|H0Y9X1|H0Y9X1_HUMAN Translation machinery-assoc	5	2	2	2	2	2	2	2	2	2	2	2	2	2	2	2	2	2	2	2	2	2	18.8	18.8	18.8	17.155	144	144;203;242;88;101	5.06		2	6	3				6	1		3	3	4
D6RA77;Q9BPZ3	D6RA77;Q9BPZ3	1;1	1;1	1;1	Polyadenylate-binding protein-interacting protein 2	PAIP2	>tr|D6RA77|D6RA77_HUMAN Polyadenylate-binding protein-interacting protein 2 (Fragment) OS=Homo sapiens GN=PAIP2 PE=4 SV=1;>sp|Q9BPZ3|PAIP2_HUMAN Polyadenylate-binding protein-interacting protein 2 OS=Homo sapiens GN=PAIP2 PE=1 SV=1	2	1	1	1	0	0	0	0	1	0	0	0	0	0	1	0	0	0	0	0	1	0	20.4	20.4	20.4	11.385	93	93;127	2		1
O95359-2;Q4VXL4;O95359-6;D6RAA5;O95359-1;Q4VXL8;O95359-5;E7EMZ9;O95359-3;E9PBC6;O95359;H0Y911;H0Y9C3;E9PGB3;H0Y8P9	O95359-2;Q4VXL4;O95359-6;D6RAA5;O95359-1;Q4VXL8;O95359-5;E7EMZ9;O95359-3;E9PBC6;O95359	8;8;8;8;8;8;8;8;8;8;8;3;2;2;1	8;8;8;8;8;8;8;8;8;8;8;3;2;2;1	7;7;7;7;7;7;7;7;7;7;7;3;2;2;1	Transforming acidic coiled-coil-containing protein 2	TACC2	>sp|O95359-2|TACC2_HUMAN Isoform 2 of Transforming acidic coiled-coil-containing protein 2 OS=Homo sapiens GN=TACC2;>tr|Q4VXL4|Q4VXL4_HUMAN HCG41426, isoform CRA_c OS=Homo sapiens GN=TACC2 PE=1 SV=1;>sp|O95359-6|TACC2_HUMAN Isoform 6 of Transforming acidic	15	8	8	7	7	7	7	6	7	8	7	7	7	6	7	8	6	6	6	5	6	7	18.7	18.7	17.3	64.155	571	571;575;996;1008;1026;1038;1094;2826;2871;2875;2948;409;153;669;184	4	17	7		12	12		3	11			10	10	10
D6RAC5;U3KQ46;P81877-2;P81877-4;P81877-5;P81877-3;Q9BWW4-2;P81877;Q9BWG4-2;Q9BWW4-3;Q9BWG4;Q9BWW4	D6RAC5;U3KQ46;P81877-2;P81877-4;P81877-5;P81877-3;Q9BWW4-2;P81877;Q9BWG4-2;Q9BWW4-3;Q9BWG4;Q9BWW4	1;1;1;1;1;1;1;1;1;1;1;1	1;1;1;1;1;1;1;1;1;1;1;1	1;1;1;1;1;1;1;1;1;1;1;1	Single-stranded DNA-binding protein 2;Single-stranded DNA-binding protein 4;Single-stranded DNA-binding protein 3	SSBP2;SSBP4;SSBP3	>tr|D6RAC5|D6RAC5_HUMAN Single-stranded DNA-binding protein 2 (Fragment) OS=Homo sapiens GN=SSBP2 PE=4 SV=2;>tr|U3KQ46|U3KQ46_HUMAN Single-stranded DNA-binding protein 4 (Fragment) OS=Homo sapiens GN=SSBP4 PE=4 SV=2;>sp|P81877-2|SSBP2_HUMAN Isoform 2 of Si	12	1	1	1	1	1	1	1	1	1	1	1	1	1	1	1	1	1	1	1	1	1	4.8	4.8	4.8	22.667	208	208;234;298;331;339;341;361;361;363;368;385;388	4.56				4	5						1	2	1
D6RAD4;P50613;D6REC6;D6R9G1;D6RFL0;D6RGG9;D6RI01;D6R9Z2;D6RF14;D6RIG9;Q9C098	D6RAD4;P50613;D6REC6;D6R9G1	3;3;2;2;1;1;1;1;1;1;1	3;3;2;2;1;1;1;1;1;1;1	3;3;2;2;1;1;1;1;1;1;1	Cyclin-dependent kinase 7	CDK7	>tr|D6RAD4|D6RAD4_HUMAN Cyclin-dependent kinase 7 OS=Homo sapiens GN=CDK7 PE=1 SV=1;>sp|P50613|CDK7_HUMAN Cyclin-dependent kinase 7 OS=Homo sapiens GN=CDK7 PE=1 SV=1;>tr|D6REC6|D6REC6_HUMAN Cyclin-dependent kinase 7 (Fragment) OS=Homo sapiens GN=CDK7 PE=1	11	3	3	3	2	3	3	3	2	3	2	3	3	3	2	3	2	3	3	3	2	3	12	12	12	34.643	309	309;346;149;253;43;55;58;58;69;77;648	5			1	6	9	2	3				3	4	4
D6RFM0;P62837-2;D6RAH7;H9KV45;P62837;P61077;P61077-2;P61077-3;D6RAW0	D6RFM0;P62837-2;D6RAH7;H9KV45;P62837;P61077;P61077-2;P61077-3;D6RAW0	3;3;3;3;3;3;3;3;2	3;3;3;3;3;3;3;3;2	2;2;2;2;2;2;2;2;1	Ubiquitin-conjugating enzyme E2 D2;Ubiquitin-conjugating enzyme E2 D3	UBE2D2;UBE2D3	>tr|D6RFM0|D6RFM0_HUMAN Ubiquitin-conjugating enzyme E2 D2 (Fragment) OS=Homo sapiens GN=UBE2D2 PE=3 SV=1;>sp|P62837-2|UB2D2_HUMAN Isoform 2 of Ubiquitin-conjugating enzyme E2 D2 OS=Homo sapiens GN=UBE2D2;>tr|D6RAH7|D6RAH7_HUMAN Ubiquitin-conjugating enzym	9	3	3	2	2	2	2	2	3	3	2	2	2	2	3	3	1	1	1	1	2	2	54.1	54.1	35.7	11.065	98	98;118;118;141;147;147;148;149;72	8.13							6	9	7	1	3	3	3
D6RAN8;Q9P0M9;H7C5U8;D6RE11;B3KN43	D6RAN8;Q9P0M9;H7C5U8	5;5;4;1;1	5;5;4;1;1	5;5;4;1;1	39S ribosomal protein L27, mitochondrial	MRPL27	>tr|D6RAN8|D6RAN8_HUMAN 39S ribosomal protein L27, mitochondrial OS=Homo sapiens GN=MRPL27 PE=1 SV=1;>sp|Q9P0M9|RM27_HUMAN 39S ribosomal protein L27, mitochondrial OS=Homo sapiens GN=MRPL27 PE=1 SV=1;>tr|H7C5U8|H7C5U8_HUMAN 39S ribosomal protein L27, mitoc	5	5	5	5	5	5	4	4	4	5	5	5	4	4	4	5	5	5	4	4	4	5	64.5	64.5	64.5	10.474	93	93;148;136;84;94	5.93		15		6	12	6	17	17	5	3	15	16	16
D6RB01;Q9Y6X4;D6RC41;D6R953	D6RB01;Q9Y6X4	3;3;1;1	3;3;1;1	3;3;1;1	Soluble lamin-associated protein of 75 kDa	FAM169A	>tr|D6RB01|D6RB01_HUMAN Soluble lamin-associated protein of 75 kDa OS=Homo sapiens GN=FAM169A PE=1 SV=1;>sp|Q9Y6X4|F169A_HUMAN Soluble lamin-associated protein of 75 kDa OS=Homo sapiens GN=FAM169A PE=1 SV=2	4	3	3	3	2	2	2	3	1	2	2	2	2	3	1	2	2	2	2	3	1	2	4.9	4.9	4.9	68.054	610	610;670;175;222	5.67			4		4	1				3	2	2	2
D6RB81;Q9UHK6;Q9UHK6-5;V9GZ45;V9GYP4;Q9UHK6-4;Q9UHK6-2;V9GYU9	D6RB81;Q9UHK6;Q9UHK6-5;V9GZ45;V9GYP4;Q9UHK6-4;Q9UHK6-2;V9GYU9	6;6;6;5;5;4;4;4	6;6;6;5;5;4;4;4	6;6;6;5;5;4;4;4	Alpha-methylacyl-CoA racemase	AMACR	>tr|D6RB81|D6RB81_HUMAN Alpha-methylacyl-CoA racemase OS=Homo sapiens GN=AMACR PE=4 SV=1;>sp|Q9UHK6|AMACR_HUMAN Alpha-methylacyl-CoA racemase OS=Homo sapiens GN=AMACR PE=1 SV=2;>sp|Q9UHK6-5|AMACR_HUMAN Isoform 4 of Alpha-methylacyl-CoA racemase OS=Homo sap	8	6	6	6	5	5	5	4	6	6	5	5	5	4	6	6	5	5	5	4	6	6	19.1	19.1	19.1	40.674	367	367;382;394;260;288;198;229;281	7.52			6	2	1		12	9	6	12	8	9	7
O75380;D6RBT3	O75380;D6RBT3	2;2	2;2	2;2	NADH dehydrogenase [ubiquinone] iron-sulfur protein 6, mitochondrial	NDUFS6	>sp|O75380|NDUS6_HUMAN NADH dehydrogenase [ubiquinone] iron-sulfur protein 6, mitochondrial OS=Homo sapiens GN=NDUFS6 PE=1 SV=1;>tr|D6RBT3|D6RBT3_HUMAN NADH dehydrogenase [ubiquinone] iron-sulfur protein 6, mitochondrial OS=Homo sapiens GN=NDUFS6 PE=1 SV=1	2	2	2	2	2	2	1	2	2	2	2	2	1	2	2	2	2	2	1	2	2	2	23.4	23.4	23.4	13.711	124	124;172	2.5	5	2	14	1							4	5	2
P06730;P06730-3;D6RBW1;P06730-2;H0Y8J7;D6RFJ3	P06730;P06730-3;D6RBW1;P06730-2;H0Y8J7	6;6;6;6;3;1	6;6;6;6;3;1	6;6;6;6;3;1	Eukaryotic translation initiation factor 4E	EIF4E	>sp|P06730|IF4E_HUMAN Eukaryotic translation initiation factor 4E OS=Homo sapiens GN=EIF4E PE=1 SV=2;>sp|P06730-3|IF4E_HUMAN Isoform 3 of Eukaryotic translation initiation factor 4E OS=Homo sapiens GN=EIF4E;>tr|D6RBW1|D6RBW1_HUMAN Eukaryotic translation in	6	6	6	6	6	6	6	6	6	6	6	6	6	6	6	6	6	6	6	6	6	6	28.6	28.6	28.6	25.097	217	217;237;245;248;155;42	3.69	18	6	4	24	13				1	5	12	14	12
D6RC52;D6RCB9;Q9NX24;H0YC83;J3QSY4	D6RC52;D6RCB9;Q9NX24;H0YC83;J3QSY4	2;2;2;1;1	2;2;2;1;1	2;2;2;1;1	H/ACA ribonucleoprotein complex subunit 2	NHP2	>tr|D6RC52|D6RC52_HUMAN H/ACA ribonucleoprotein complex subunit 2 (Fragment) OS=Homo sapiens GN=NHP2 PE=1 SV=1;>tr|D6RCB9|D6RCB9_HUMAN H/ACA ribonucleoprotein complex subunit 2 (Fragment) OS=Homo sapiens GN=NHP2 PE=1 SV=1;>sp|Q9NX24|NHP2_HUMAN H/ACA ribonu	5	2	2	2	1	1	2	1	2	2	1	1	2	1	2	2	1	1	2	1	2	2	22	22	22	15.017	132	132;135;153;85;90	7.8							2	8			1	1	3
D6RGF1;D6RCC2;Q9UBU2;O94907	D6RGF1;D6RCC2;Q9UBU2;O94907	1;1;1;1	1;1;1;1	1;1;1;1	Dickkopf-related protein 2;Dickkopf-related protein 1	DKK2;DKK1	>tr|D6RGF1|D6RGF1_HUMAN Dickkopf-related protein 2 OS=Homo sapiens GN=DKK2 PE=4 SV=1;>tr|D6RCC2|D6RCC2_HUMAN Dickkopf-related protein 2 OS=Homo sapiens GN=DKK2 PE=4 SV=1;>sp|Q9UBU2|DKK2_HUMAN Dickkopf-related protein 2 OS=Homo sapiens GN=DKK2 PE=1 SV=1;>sp	4	1	1	1	1	1	1	1	1	1	1	1	1	1	1	1	1	1	1	1	1	1	6.3	6.3	6.3	18.146	159	159;213;259;266	5.12				2	10	4					4	3	4
D6RCD0;Q8NBQ5	D6RCD0;Q8NBQ5	11;11	11;11	11;11	Estradiol 17-beta-dehydrogenase 11	HSD17B11	>tr|D6RCD0|D6RCD0_HUMAN Estradiol 17-beta-dehydrogenase 11 OS=Homo sapiens GN=HSD17B11 PE=1 SV=1;>sp|Q8NBQ5|DHB11_HUMAN Estradiol 17-beta-dehydrogenase 11 OS=Homo sapiens GN=HSD17B11 PE=1 SV=3	2	11	11	11	11	11	10	10	11	11	11	11	10	10	11	11	11	11	10	10	11	11	50	50	50	28.074	256	256;300	6.39		12	11	24	14	19	26	42	18	12	28	30	28
H0YAG5;D6RCM2;Q9Y3D5	H0YAG5;D6RCM2;Q9Y3D5	1;1;1	1;1;1	1;1;1	28S ribosomal protein S18c, mitochondrial	MRPS18C	>tr|H0YAG5|H0YAG5_HUMAN 28S ribosomal protein S18c, mitochondrial (Fragment) OS=Homo sapiens GN=MRPS18C PE=1 SV=1;>tr|D6RCM2|D6RCM2_HUMAN 28S ribosomal protein S18c, mitochondrial OS=Homo sapiens GN=MRPS18C PE=1 SV=1;>sp|Q9Y3D5|RT18C_HUMAN 28S ribosomal pr	3	1	1	1	0	0	1	1	0	0	0	0	1	1	0	0	0	0	1	1	0	0	10.6	10.6	10.6	12.389	113	113;114;142	9									2				1
O95379-3;O95379-2;O95379;D6RCM8;O95379-4	O95379-3;O95379-2;O95379;D6RCM8;O95379-4	3;3;3;3;3	3;3;3;3;3	3;3;3;3;3	Tumor necrosis factor alpha-induced protein 8	TNFAIP8	>sp|O95379-3|TFIP8_HUMAN Isoform 3 of Tumor necrosis factor alpha-induced protein 8 OS=Homo sapiens GN=TNFAIP8;>sp|O95379-2|TFIP8_HUMAN Isoform 2 of Tumor necrosis factor alpha-induced protein 8 OS=Homo sapiens GN=TNFAIP8;>sp|O95379|TFIP8_HUMAN Tumor necro	5	3	3	3	3	3	3	2	3	3	3	3	3	2	3	3	3	3	3	2	3	3	16.5	16.5	16.5	21.877	188	188;190;198;200;210	3.57	8	5			8	7					3	3	6
D6RE00;Q9NYF3	D6RE00;Q9NYF3	1;1	1;1	1;1	Protein FAM53C	FAM53C	>tr|D6RE00|D6RE00_HUMAN Protein FAM53C OS=Homo sapiens GN=FAM53C PE=1 SV=1;>sp|Q9NYF3|FA53C_HUMAN Protein FAM53C OS=Homo sapiens GN=FAM53C PE=1 SV=1	2	1	1	1	1	1	1	1	1	1	1	1	1	1	1	1	1	1	1	1	1	1	9.6	9.6	9.6	12.323	114	114;392	9									6		1	1	1
D6REA0;O75879;H0Y9W6	D6REA0;O75879	6;6;1	6;6;1	2;2;1	Glutamyl-tRNA(Gln) amidotransferase subunit B, mitochondrial	PET112	>tr|D6REA0|D6REA0_HUMAN Glutamyl-tRNA(Gln) amidotransferase subunit B, mitochondrial OS=Homo sapiens GN=PET112 PE=3 SV=1;>sp|O75879|GATB_HUMAN Glutamyl-tRNA(Gln) amidotransferase subunit B, mitochondrial OS=Homo sapiens GN=PET112 PE=1 SV=1	3	6	6	2	5	4	3	3	4	5	5	4	3	3	4	5	2	2	1	1	2	2	10.1	10.1	3.7	57.653	516	516;557;132	5.06	1	1	5	6	8	4	3	5			9	5	3
Q9H173;D6REA1;D6RIU8;D6RG16;D6RBP7;D6RAI3	Q9H173;D6REA1	10;10;2;1;1;1	10;10;2;1;1;1	10;10;2;1;1;1	Nucleotide exchange factor SIL1	SIL1	>sp|Q9H173|SIL1_HUMAN Nucleotide exchange factor SIL1 OS=Homo sapiens GN=SIL1 PE=1 SV=1;>tr|D6REA1|D6REA1_HUMAN Nucleotide exchange factor SIL1 OS=Homo sapiens GN=SIL1 PE=1 SV=1	6	10	10	10	9	9	9	9	8	9	9	9	9	9	8	9	9	9	9	9	8	9	21	21	21	52.084	461	461;468;163;123;123;125	7.2		8	6	6	4		6	4	25	17	14	15	11
D6REL0;Q9NRR3	D6REL0;Q9NRR3	1;1	1;1	1;1	CDC42 small effector protein 2	CDC42SE2	>tr|D6REL0|D6REL0_HUMAN CDC42 small effector protein 2 OS=Homo sapiens GN=CDC42SE2 PE=4 SV=1;>sp|Q9NRR3|C42S2_HUMAN CDC42 small effector protein 2 OS=Homo sapiens GN=CDC42SE2 PE=1 SV=1	2	1	1	1	0	1	1	1	1	1	0	1	1	1	1	1	0	1	1	1	1	1	33.3	33.3	33.3	5.8705	57	57;84	4.6				2	3							1	1
D6REL5;Q6UWZ7	D6REL5;Q6UWZ7	1;1	1;1	1;1	BRCA1-A complex subunit Abraxas	FAM175A	>tr|D6REL5|D6REL5_HUMAN BRCA1-A complex subunit Abraxas OS=Homo sapiens GN=FAM175A PE=1 SV=1;>sp|Q6UWZ7|F175A_HUMAN BRCA1-A complex subunit Abraxas OS=Homo sapiens GN=FAM175A PE=1 SV=2	2	1	1	1	0	0	0	1	0	0	0	0	0	1	0	0	0	0	0	1	0	0	2.5	2.5	2.5	41.578	360	360;409	3			1
D6REQ6;D6RHI9;O00584;H0YAE9	D6REQ6;D6RHI9;O00584;H0YAE9	2;2;2;1	2;2;2;1	2;2;2;1	Ribonuclease T2	RNASET2	>tr|D6REQ6|D6REQ6_HUMAN Ribonuclease T2 OS=Homo sapiens GN=RNASET2 PE=1 SV=1;>tr|D6RHI9|D6RHI9_HUMAN Ribonuclease T2 (Fragment) OS=Homo sapiens GN=RNASET2 PE=1 SV=2;>sp|O00584|RNT2_HUMAN Ribonuclease T2 OS=Homo sapiens GN=RNASET2 PE=1 SV=2;>tr|H0YAE9|H0YAE	4	2	2	2	2	2	2	2	2	1	2	2	2	2	2	1	2	2	2	2	2	1	10.1	10.1	10.1	25.308	218	218;253;256;185	4.93				4	8	3					4	3	2
D6RGI3;Q9NVA2;D6RER5;Q9NVA2-2;D6RDU5;H0Y961;Q14141-2;Q14141-4;B1AMS2;Q14141;F5H1J5;B4E049;D6RDP1;D6R9Y6;H0Y9G8;Q14141-3	D6RGI3;Q9NVA2;D6RER5;Q9NVA2-2;D6RDU5	12;12;12;11;9;5;5;5;5;5;5;4;3;3;2;2	12;12;12;11;9;5;5;5;5;5;5;4;3;3;2;2	9;9;9;8;6;4;3;3;3;3;3;2;3;3;2;1	Septin-11	2019-09-11	>tr|D6RGI3|D6RGI3_HUMAN Septin 11, isoform CRA_b OS=Homo sapiens GN=SEPT11 PE=1 SV=1;>sp|Q9NVA2|SEP11_HUMAN Septin-11 OS=Homo sapiens GN=SEPT11 PE=1 SV=3;>tr|D6RER5|D6RER5_HUMAN Septin-11 OS=Homo sapiens GN=SEPT11 PE=1 SV=1;>sp|Q9NVA2-2|SEP11_HUMAN Isoform	16	12	12	9	11	11	10	11	12	12	11	11	10	11	12	12	9	9	8	9	9	9	35.3	35.3	27.3	49.005	425	425;429;432;439;372;160;427;429;431;434;457;369;126;136;82;267	5.08	8	16	34	28	17	18	9	19	24		29	29	30
O94979-6;O94979-3;O94979-10;O94979-4;O94979-9;O94979-2;O94979;O94979-8;D6REX3;O94979-7;H7BXG7;D6RHZ5;O94979-5;H0YAB3;H0Y8W8;H0Y8V7;H0Y9T9;H0Y9K1;H0YAF5;D6RE64;D6RCQ9;D6RBT0;D6RHE8;H0Y9V3	O94979-6;O94979-3;O94979-10;O94979-4;O94979-9;O94979-2;O94979;O94979-8;D6REX3;O94979-7;H7BXG7;D6RHZ5;O94979-5	27;27;27;27;27;27;27;27;27;21;21;20;14;10;7;6;5;5;4;3;3;2;2;2	27;27;27;27;27;27;27;27;27;21;21;20;14;10;7;6;5;5;4;3;3;2;2;2	27;27;27;27;27;27;27;27;27;21;21;20;14;10;7;6;5;5;4;3;3;2;2;2	Protein transport protein Sec31A	SEC31A	>sp|O94979-6|SC31A_HUMAN Isoform 6 of Protein transport protein Sec31A OS=Homo sapiens GN=SEC31A;>sp|O94979-3|SC31A_HUMAN Isoform 3 of Protein transport protein Sec31A OS=Homo sapiens GN=SEC31A;>sp|O94979-10|SC31A_HUMAN Isoform 10 of Protein transport prot	24	27	27	27	25	24	23	25	22	24	25	24	23	25	22	24	25	24	23	25	22	24	33.8	33.8	33.8	117.67	1067	1067;1106;1166;1181;1200;1205;1220;1233;1251;969;969;877;509;443;383;285;235;237;181;164;166;81;92;219	6.42		21	33	63	35	39	45	37	70	44	72	66	62
D6RF48;Q9P2W9;D6RD65;D6RC71;H0YAL4	D6RF48;Q9P2W9	7;7;2;1;1	7;7;2;1;1	7;7;2;1;1	Syntaxin-18	STX18	>tr|D6RF48|D6RF48_HUMAN Syntaxin-18 OS=Homo sapiens GN=STX18 PE=1 SV=1;>sp|Q9P2W9|STX18_HUMAN Syntaxin-18 OS=Homo sapiens GN=STX18 PE=1 SV=1	5	7	7	7	5	5	2	4	5	7	5	5	2	4	5	7	5	5	2	4	5	7	28.2	28.2	28.2	35.42	308	308;335;173;169;175	6.42		1	1	5	1	6	12		1	4	5	6	2
P27707;D6RFG8;D6RCP9	P27707;D6RFG8;D6RCP9	7;7;5	7;7;5	7;7;5	Deoxycytidine kinase	DCK	>sp|P27707|DCK_HUMAN Deoxycytidine kinase OS=Homo sapiens GN=DCK PE=1 SV=1;>tr|D6RFG8|D6RFG8_HUMAN Deoxycytidine kinase OS=Homo sapiens GN=DCK PE=1 SV=1;>tr|D6RCP9|D6RCP9_HUMAN Deoxycytidine kinase OS=Homo sapiens GN=DCK PE=1 SV=1	3	7	7	7	6	7	5	5	7	6	6	7	5	5	7	6	6	7	5	5	7	6	26.2	26.2	26.2	30.518	260	260;317;199	4.61	4	5	11	10	9	10	2	6	2		8	14	8
D6RFI3;Q9GZM5;E7EQR8;H0Y9A1;D6RGY8	D6RFI3;Q9GZM5;E7EQR8;H0Y9A1	3;3;3;2;1	3;3;3;2;1	3;3;3;2;1	Protein YIPF3;Protein YIPF3, 36 kDa form III	YIPF3	>tr|D6RFI3|D6RFI3_HUMAN Protein YIPF3 (Fragment) OS=Homo sapiens GN=YIPF3 PE=1 SV=1;>sp|Q9GZM5|YIPF3_HUMAN Protein YIPF3 OS=Homo sapiens GN=YIPF3 PE=1 SV=1;>tr|E7EQR8|E7EQR8_HUMAN Protein YIPF3 OS=Homo sapiens GN=YIPF3 PE=1 SV=1;>tr|H0Y9A1|H0Y9A1_HUMAN Pro	5	3	3	3	3	3	3	3	3	3	3	3	3	3	3	3	3	3	3	3	3	3	9.2	9.2	9.2	28.797	262	262;350;356;135;109	7.79					1	11	6	7	14	4	7	7	6
D6RFW1;Q96EQ0	D6RFW1;Q96EQ0	3;3	3;3	3;3	Small glutamine-rich tetratricopeptide repeat-containing protein beta	SGTB	>tr|D6RFW1|D6RFW1_HUMAN Small glutamine-rich tetratricopeptide repeat-containing protein beta (Fragment) OS=Homo sapiens GN=SGTB PE=1 SV=1;>sp|Q96EQ0|SGTB_HUMAN Small glutamine-rich tetratricopeptide repeat-containing protein beta OS=Homo sapiens GN=SGTB P	2	3	3	3	3	2	2	3	1	1	3	2	2	3	1	1	3	2	2	3	1	1	14.4	14.4	14.4	21.83	195	195;304	7.23	3								9	1	4	2	2
P15514;D6RFX5	P15514;D6RFX5	1;1	1;1	1;1	Amphiregulin	AREG	>sp|P15514|AREG_HUMAN Amphiregulin OS=Homo sapiens GN=AREG PE=1 SV=2;>tr|D6RFX5|D6RFX5_HUMAN Amphiregulin OS=Homo sapiens GN=AREG PE=4 SV=1	2	1	1	1	1	1	1	1	1	1	1	1	1	1	1	1	1	1	1	1	1	1	4.4	4.4	4.4	27.895	252	252;274	3.69			5	7	1						2	1	2
Q99715-4;D6RGG3;Q99715;Q99715-2	Q99715-4;D6RGG3;Q99715;Q99715-2	3;3;3;2	3;3;3;2	2;2;2;1	Collagen alpha-1(XII) chain	COL12A1	>sp|Q99715-4|COCA1_HUMAN Isoform 4 of Collagen alpha-1(XII) chain OS=Homo sapiens GN=COL12A1;>tr|D6RGG3|D6RGG3_HUMAN Collagen alpha-1(XII) chain OS=Homo sapiens GN=COL12A1 PE=1 SV=1;>sp|Q99715|COCA1_HUMAN Collagen alpha-1(XII) chain OS=Homo sapiens GN=COL1	4	3	3	2	3	2	1	1	2	1	3	2	1	1	2	1	2	2	1	1	2	1	0.9	0.9	0.6	324.57	2987	2987;3062;3063;1899	6.21					4	3	7				4	2	2
D6RHW1;D6RIY1;D6RGK3;D6RIV9;D6RIE8;Q9HBM6;Q16594	D6RHW1;D6RIY1;D6RGK3;D6RIV9;D6RIE8;Q9HBM6;Q16594	3;3;3;3;3;3;3	3;3;3;3;3;3;3	3;3;3;3;3;3;3	Transcription initiation factor TFIID subunit 9B;Transcription initiation factor TFIID subunit 9	TAF9;TAF9B	>tr|D6RHW1|D6RHW1_HUMAN Transcription initiation factor TFIID subunit 9 (Fragment) OS=Homo sapiens GN=TAF9 PE=1 SV=1;>tr|D6RIY1|D6RIY1_HUMAN Transcription initiation factor TFIID subunit 9 (Fragment) OS=Homo sapiens GN=TAF9 PE=1 SV=1;>tr|D6RGK3|D6RGK3_HUMA	7	3	3	3	3	3	1	3	2	2	3	3	1	3	2	2	3	3	1	3	2	2	28.4	28.4	28.4	11.57	102	102;127;135;166;197;251;264	4.75		1	5	6	1					3	3	3	2
P14406;D6RIE3;D6RGV5;H0UI06;D6R9C3	P14406;D6RIE3;D6RGV5;H0UI06;D6R9C3	2;2;2;2;1	2;2;2;2;1	2;2;2;2;1	Cytochrome c oxidase subunit 7A2, mitochondrial	COX7A2	>sp|P14406|CX7A2_HUMAN Cytochrome c oxidase subunit 7A2, mitochondrial OS=Homo sapiens GN=COX7A2 PE=1 SV=1;>tr|D6RIE3|D6RIE3_HUMAN Uncharacterized protein OS=Homo sapiens GN=COX7A2 PE=1 SV=1;>tr|D6RGV5|D6RGV5_HUMAN Cytochrome c oxidase subunit 7A2, mitocho	5	2	2	2	2	2	2	2	2	2	2	2	2	2	2	2	2	2	2	2	2	2	27.7	27.7	27.7	9.3959	83	83;91;103;115;53	4.58		2	6	8	6	5	4				5	6	6
D6RHG0;P78383;D6R9G9;D6RE58;D6RB73;P78383-2;D6RG34;D6RDY9;D6R981	D6RHG0;P78383;D6R9G9;D6RE58;D6RB73;P78383-2	3;3;2;2;2;2;1;1;1	3;3;2;2;2;2;1;1;1	3;3;2;2;2;2;1;1;1	Solute carrier family 35 member B1	SLC35B1	>tr|D6RHG0|D6RHG0_HUMAN Solute carrier family 35 member B1 (Fragment) OS=Homo sapiens GN=SLC35B1 PE=1 SV=2;>sp|P78383|S35B1_HUMAN Solute carrier family 35 member B1 OS=Homo sapiens GN=SLC35B1 PE=1 SV=1;>tr|D6R9G9|D6R9G9_HUMAN Solute carrier family 35 membe	9	3	3	3	2	2	2	3	3	3	2	2	2	3	3	3	2	2	2	3	3	3	14.5	14.5	14.5	27.645	248	248;322;158;187;254;359;76;120;227	7.53		5							2	10	2	2	3
Q86VE9-3;Q86VE9-2;Q86VE9;D6RHG7;Q86VE9-4	Q86VE9-3;Q86VE9-2;Q86VE9;D6RHG7;Q86VE9-4	2;2;2;2;2	2;2;2;2;2	2;2;2;2;2	Serine incorporator 5	SERINC5	>sp|Q86VE9-3|SERC5_HUMAN Isoform 3 of Serine incorporator 5 OS=Homo sapiens GN=SERINC5;>sp|Q86VE9-2|SERC5_HUMAN Isoform 2 of Serine incorporator 5 OS=Homo sapiens GN=SERINC5;>sp|Q86VE9|SERC5_HUMAN Serine incorporator 5 OS=Homo sapiens GN=SERINC5 PE=2 SV=1;	5	2	2	2	1	2	1	0	2	2	1	2	1	0	2	2	1	2	1	0	2	2	5	5	5	46.373	417	417;420;423;456;461	2.38		5	3								1	2	1
D6RIC3;Q9Y3C1;Q9Y3C1-2;D6RC60;D6RG37	D6RIC3;Q9Y3C1;Q9Y3C1-2;D6RC60	4;4;4;2;1	4;4;4;2;1	4;4;4;2;1	Nucleolar protein 16	NOP16	>tr|D6RIC3|D6RIC3_HUMAN Nucleolar protein 16 OS=Homo sapiens GN=NOP16 PE=1 SV=1;>sp|Q9Y3C1|NOP16_HUMAN Nucleolar protein 16 OS=Homo sapiens GN=NOP16 PE=1 SV=2;>sp|Q9Y3C1-2|NOP16_HUMAN Isoform 2 of Nucleolar protein 16 OS=Homo sapiens GN=NOP16;>tr|D6RC60|D6	5	4	4	4	3	4	3	3	3	3	3	4	3	3	3	3	3	4	3	3	3	3	24.7	24.7	24.7	17.198	150	150;178;236;95;70	3.65		6	2	13	5						4	6	4
Q86TN9;D6RIC8;Q96DR4;D6RDM5;D6REN7	Q86TN9;D6RIC8;Q96DR4;D6RDM5;D6REN7	2;2;2;1;1	2;2;2;1;1	2;2;2;1;1	StAR-related lipid transfer protein 4	STARD4	>tr|Q86TN9|Q86TN9_HUMAN STARD4 protein OS=Homo sapiens GN=STARD4 PE=2 SV=1;>tr|D6RIC8|D6RIC8_HUMAN StAR-related lipid transfer protein 4 OS=Homo sapiens GN=STARD4 PE=4 SV=1;>sp|Q96DR4|STAR4_HUMAN StAR-related lipid transfer protein 4 OS=Homo sapiens GN=STA	5	2	2	2	1	1	0	1	1	2	1	1	0	1	1	2	1	1	0	1	1	2	18.9	18.9	18.9	18.517	159	159;191;205;55;68	7.67					2				4		1	1
D6RIY6;Q06265;Q06265-2;D6R905;Q06265-3;Q06265-4;H0Y9L5;D6RA17;D6RAP4	D6RIY6;Q06265;Q06265-2;D6R905;Q06265-3;Q06265-4;H0Y9L5;D6RA17	6;6;6;5;4;4;3;3;2	6;6;6;5;4;4;3;3;2	6;6;6;5;4;4;3;3;2	Exosome complex component RRP45	EXOSC9	>tr|D6RIY6|D6RIY6_HUMAN Exosome complex component RRP45 OS=Homo sapiens GN=EXOSC9 PE=1 SV=1;>sp|Q06265|EXOS9_HUMAN Exosome complex component RRP45 OS=Homo sapiens GN=EXOSC9 PE=1 SV=3;>sp|Q06265-2|EXOS9_HUMAN Isoform 2 of Exosome complex component RRP45 OS=	9	6	6	6	5	5	4	6	4	5	5	5	4	6	4	5	5	5	4	6	4	5	18.2	18.2	18.2	46.977	423	423;439;456;226;355;372;172;242;86	6.62						18	20	1	1		6	6	6
E9PCZ3;D6RJC3;O15327;E7EQN9;E9PHC0;E9PG59	E9PCZ3;D6RJC3;O15327;E7EQN9;E9PHC0	6;6;6;6;5;2	6;6;6;6;5;2	6;6;6;6;5;2	Type II inositol 3,4-bisphosphate 4-phosphatase	INPP4B	>tr|E9PCZ3|E9PCZ3_HUMAN Type II inositol 3,4-bisphosphate 4-phosphatase (Fragment) OS=Homo sapiens GN=INPP4B PE=4 SV=1;>tr|D6RJC3|D6RJC3_HUMAN Type II inositol 3,4-bisphosphate 4-phosphatase (Fragment) OS=Homo sapiens GN=INPP4B PE=4 SV=1;>sp|O15327|INP4B_H	6	6	6	6	5	5	4	6	3	5	5	5	4	6	3	5	5	5	4	6	3	5	11.5	11.5	11.5	78.154	688	688;817;924;938;686;416	8.26						5	7	5	10	8	6	6	5
H0YGP9;E1B6W4;Q7L4I2-2;Q7L4I2	H0YGP9;E1B6W4;Q7L4I2-2;Q7L4I2	1;1;1;1	1;1;1;1	1;1;1;1	Arginine/serine-rich coiled-coil protein 2	RSRC2	>tr|H0YGP9|H0YGP9_HUMAN Arginine/serine-rich coiled-coil protein 2 (Fragment) OS=Homo sapiens GN=RSRC2 PE=1 SV=1;>tr|E1B6W4|E1B6W4_HUMAN Arginine/serine-rich coiled-coil protein 2 (Fragment) OS=Homo sapiens GN=RSRC2 PE=1 SV=1;>sp|Q7L4I2-2|RSRC2_HUMAN Isofo	4	1	1	1	1	1	1	1	1	1	1	1	1	1	1	1	1	1	1	1	1	1	6.8	6.8	6.8	21.577	176	176;236;386;434	1	8										1	2	1
E2QRH7;Q9NYP7;Q9NYP7-2;Q9NYP7-3	E2QRH7;Q9NYP7;Q9NYP7-2;Q9NYP7-3	2;2;2;1	2;2;2;1	2;2;2;1	Elongation of very long chain fatty acids protein 5	ELOVL5	>tr|E2QRH7|E2QRH7_HUMAN Elongation of very long chain fatty acids protein OS=Homo sapiens GN=ELOVL5 PE=1 SV=2;>sp|Q9NYP7|ELOV5_HUMAN Elongation of very long chain fatty acids protein 5 OS=Homo sapiens GN=ELOVL5 PE=1 SV=1;>sp|Q9NYP7-2|ELOV5_HUMAN Isoform 2	4	2	2	2	2	2	2	2	2	2	2	2	2	2	2	2	2	2	2	2	2	2	7.6	7.6	7.6	34.202	289	289;299;326;88	7.67						1	11	7	5		4	5	3
E2QRM6;Q9H2U2;Q9H2U2-2;Q9H2U2-6;Q9H2U2-3;D6R967;H0Y9D8;Q9H2U2-4;B4DFH3;D6RGV9;H0YAK2;D6RAD3	E2QRM6;Q9H2U2;Q9H2U2-2;Q9H2U2-6;Q9H2U2-3;D6R967;H0Y9D8	10;10;10;8;8;7;6;4;4;3;1;1	10;10;10;8;8;7;6;4;4;3;1;1	10;10;10;8;8;7;6;4;4;3;1;1	Inorganic pyrophosphatase 2, mitochondrial	PPA2	>tr|E2QRM6|E2QRM6_HUMAN Inorganic pyrophosphatase 2, mitochondrial OS=Homo sapiens GN=PPA2 PE=1 SV=1;>sp|Q9H2U2|IPYR2_HUMAN Inorganic pyrophosphatase 2, mitochondrial OS=Homo sapiens GN=PPA2 PE=1 SV=2;>sp|Q9H2U2-2|IPYR2_HUMAN Isoform 2 of Inorganic pyropho	12	10	10	10	10	10	7	8	10	9	10	10	7	8	10	9	10	10	7	8	10	9	42.7	42.7	42.7	35.731	316	316;334;349;232;305;191;226;168;202;195;69;113	4.67	21	20	11	4	13	16	11	30			20	21	19
E9PRZ9;E3W975;E9PM92;O00193	E9PRZ9;E3W975;E9PM92;O00193	2;2;2;2	2;2;2;2	2;2;2;2	Small acidic protein	C11orf58;SMAP	>tr|E9PRZ9|E9PRZ9_HUMAN Small acidic protein (Fragment) OS=Homo sapiens GN=C11orf58 PE=1 SV=1;>tr|E3W975|E3W975_HUMAN Small acidic protein OS=Homo sapiens GN=C11orf58 PE=1 SV=1;>tr|E9PM92|E9PM92_HUMAN Small acidic protein (Fragment) OS=Homo sapiens GN=C11o	4	2	2	2	2	2	2	2	2	2	2	2	2	2	2	2	2	2	2	2	2	2	25.6	25.6	25.6	10.038	90	90;139;156;183	1.91	28	3	5	5	3						8	7	7
E3W994;J3KR49;O75122;F5H604;E7ERI8;E7EW49;E9PBA6;F5H3X0;O75122-2;B3KR06;E7ENG2;H7C5M8;D6RBU8;H7C4M5;H7C4X8	E3W994;J3KR49;O75122;F5H604;E7ERI8;E7EW49;E9PBA6;F5H3X0	12;12;12;12;12;12;9;9;3;3;3;2;2;1;1	7;7;7;7;7;7;4;6;3;3;3;1;2;1;1	6;6;6;6;6;6;3;5;3;3;3;1;2;0;1	CLIP-associating protein 2	CLASP2	>tr|E3W994|E3W994_HUMAN CLIP-associating protein 2 OS=Homo sapiens GN=CLASP2 PE=1 SV=2;>tr|J3KR49|J3KR49_HUMAN CLIP-associating protein 2 OS=Homo sapiens GN=CLASP2 PE=1 SV=1;>sp|O75122|CLAP2_HUMAN CLIP-associating protein 2 OS=Homo sapiens GN=CLASP2 PE=1 S	15	12	7	6	9	9	11	11	12	11	5	4	6	6	7	6	5	4	5	5	6	5	11.1	7.1	5.3	138.86	1273	1273;1293;1294;1505;1513;1514;995;1063;431;454;458;220;233;178;184	6.41		4	2	11	6			5	6	10	7	5	7
P34913-3;P34913-2;E5RFU2;P34913;H0YAW7;E5RI53;E5RFH6	P34913-3;P34913-2;E5RFU2;P34913;H0YAW7	4;4;4;4;2;1;1	4;4;4;4;2;1;1	4;4;4;4;2;1;1	Bifunctional epoxide hydrolase 2;Cytosolic epoxide hydrolase 2;Lipid-phosphate phosphatase	EPHX2	>sp|P34913-3|HYES_HUMAN Isoform 3 of Bifunctional epoxide hydrolase 2 OS=Homo sapiens GN=EPHX2;>sp|P34913-2|HYES_HUMAN Isoform 2 of Bifunctional epoxide hydrolase 2 OS=Homo sapiens GN=EPHX2;>tr|E5RFU2|E5RFU2_HUMAN Lipid-phosphate phosphatase OS=Homo sapien	7	4	4	4	3	4	2	3	4	4	3	4	2	3	4	4	3	4	2	3	4	4	10.2	10.2	10.2	55.625	489	489;502;523;555;312;158;372	7.48				3		6	2	5	5	4	5	5	2
E5RFY9;Q9H425-2;Q9H425-3;Q9H425	E5RFY9;Q9H425-2;Q9H425-3;Q9H425	1;1;1;1	1;1;1;1	1;1;1;1	Uncharacterized protein C1orf198	C1orf198	>tr|E5RFY9|E5RFY9_HUMAN Uncharacterized protein C1orf198 OS=Homo sapiens GN=C1orf198 PE=4 SV=1;>sp|Q9H425-2|CA198_HUMAN Isoform 2 of Uncharacterized protein C1orf198 OS=Homo sapiens GN=C1orf198;>sp|Q9H425-3|CA198_HUMAN Isoform 3 of Uncharacterized protein	4	1	1	1	1	1	1	1	1	1	1	1	1	1	1	1	1	1	1	1	1	1	10.9	10.9	10.9	12.419	110	110;197;289;327	6.81					2	6	8	4	1		3	5	3
Q6P1N9;E5RG17;G5EA19;E5RGF2;U3KQS5;Q6P1N9-2;H0YBX2;E5RG62;E5RK70;E5RID7;E5RI69;E5RJY6	Q6P1N9;E5RG17;G5EA19;E5RGF2;U3KQS5;Q6P1N9-2;H0YBX2	9;9;7;7;7;7;6;3;3;2;1;1	9;9;7;7;7;7;6;3;3;2;1;1	9;9;7;7;7;7;6;3;3;2;1;1	Putative deoxyribonuclease TATDN1	TATDN1	>sp|Q6P1N9|TATD1_HUMAN Putative deoxyribonuclease TATDN1 OS=Homo sapiens GN=TATDN1 PE=1 SV=2;>tr|E5RG17|E5RG17_HUMAN Putative deoxyribonuclease TATDN1 (Fragment) OS=Homo sapiens GN=TATDN1 PE=1 SV=1;>tr|G5EA19|G5EA19_HUMAN Putative deoxyribonuclease TATDN1	12	9	9	9	7	9	6	6	7	7	7	9	6	6	7	7	7	9	6	6	7	7	33.7	33.7	33.7	33.601	297	297;322;207;210;210;250;202;93;110;62;56;75	4.42	6	10	16	16	9	5				11	13	12	13
E5RGN0;Q00536;Q00536-3;Q00536-2;H0YBX5;E5RJM2;H0YAZ9;E5RIY8;E5RIU4;F8VZY6;F8VQZ9	E5RGN0;Q00536;Q00536-3;Q00536-2	7;7;7;7;3;3;2;1;1;1;1	6;6;6;6;3;3;1;1;1;1;1	3;3;3;3;1;1;0;0;0;0;0	Cyclin-dependent kinase 16	CDK16	>tr|E5RGN0|E5RGN0_HUMAN Cyclin-dependent kinase 16 (Fragment) OS=Homo sapiens GN=CDK16 PE=1 SV=1;>sp|Q00536|CDK16_HUMAN Cyclin-dependent kinase 16 OS=Homo sapiens GN=CDK16 PE=1 SV=1;>sp|Q00536-3|CDK16_HUMAN Isoform 3 of Cyclin-dependent kinase 16 OS=Homo s	11	7	6	3	5	7	4	5	3	5	4	6	3	4	2	4	2	3	2	3	1	2	18.6	16.5	8.7	44.129	393	393;496;502;570;152;189;260;150;153;161;179	5		6			7	10	4				5	6	5
E5RGN3;O00244;E5RIM7	E5RGN3;O00244;E5RIM7	4;4;4	4;4;4	4;4;4	Copper transport protein ATOX1	ATOX1	>tr|E5RGN3|E5RGN3_HUMAN Copper transport protein ATOX1 OS=Homo sapiens GN=ATOX1 PE=1 SV=1;>sp|O00244|ATOX1_HUMAN Copper transport protein ATOX1 OS=Homo sapiens GN=ATOX1 PE=1 SV=1;>tr|E5RIM7|E5RIM7_HUMAN Copper transport protein ATOX1 OS=Homo sapiens GN=ATO	3	4	4	4	3	3	3	4	2	2	3	3	3	4	2	2	3	3	3	4	2	2	57.6	57.6	57.6	6.3304	59	59;68;73	4.67		15	6		8	22	5	2			12	9	8
E5RGQ3;Q9H446-2;Q9H446;E5RGS5;E5RJE3	E5RGQ3;Q9H446-2;Q9H446;E5RGS5	4;4;4;2;1	4;4;4;2;1	4;4;4;2;1	RWD domain-containing protein 1	RWDD1	>tr|E5RGQ3|E5RGQ3_HUMAN RWD domain-containing protein 1 (Fragment) OS=Homo sapiens GN=RWDD1 PE=1 SV=1;>sp|Q9H446-2|RWDD1_HUMAN Isoform 2 of RWD domain-containing protein 1 OS=Homo sapiens GN=RWDD1;>sp|Q9H446|RWDD1_HUMAN RWD domain-containing protein 1 OS=H	5	4	4	4	4	4	3	3	4	3	4	4	3	3	4	3	4	4	3	3	4	3	51.4	51.4	51.4	8.5618	72	72;147;243;67;51	3.35		11	24	4	1				1	2	7	8	8
E5RGR0;O75608-2;O75608;E5RJ48	E5RGR0;O75608-2;O75608	6;6;6;2	6;6;6;2	6;6;6;2	Acyl-protein thioesterase 1	LYPLA1	>tr|E5RGR0|E5RGR0_HUMAN Acyl-protein thioesterase 1 (Fragment) OS=Homo sapiens GN=LYPLA1 PE=1 SV=1;>sp|O75608-2|LYPA1_HUMAN Isoform 2 of Acyl-protein thioesterase 1 OS=Homo sapiens GN=LYPLA1;>sp|O75608|LYPA1_HUMAN Acyl-protein thioesterase 1 OS=Homo sapien	4	6	6	6	5	5	2	4	5	5	5	5	2	4	5	5	5	5	2	4	5	5	57.4	57.4	57.4	20.861	197	197;214;230;90	7.95					2	6	8	9		12	6	7	6
E5RJV5;E5RGS2;Q9H6H4;Q9H6H4-2	E5RJV5;E5RGS2;Q9H6H4;Q9H6H4-2	7;7;7;5	7;7;7;5	7;7;7;5	Receptor expression-enhancing protein 4	REEP4	>tr|E5RJV5|E5RJV5_HUMAN Receptor expression-enhancing protein 4 (Fragment) OS=Homo sapiens GN=REEP4 PE=1 SV=1;>tr|E5RGS2|E5RGS2_HUMAN Receptor expression-enhancing protein 4 OS=Homo sapiens GN=REEP4 PE=1 SV=1;>sp|Q9H6H4|REEP4_HUMAN Receptor expression-enha	4	7	7	7	6	6	7	7	7	7	6	6	7	7	7	7	6	6	7	7	7	7	34.9	34.9	34.9	22.062	192	192;251;257;173	5.16	1	16	4	8	9	4		10	11		10	10	11
E5RGS4;O60925;D6RGG5	E5RGS4;O60925	9;9;2	9;9;2	9;9;2	Prefoldin subunit 1	PFDN1	>tr|E5RGS4|E5RGS4_HUMAN Prefoldin subunit 1 OS=Homo sapiens GN=PFDN1 PE=1 SV=1;>sp|O60925|PFD1_HUMAN Prefoldin subunit 1 OS=Homo sapiens GN=PFDN1 PE=1 SV=2	3	9	9	9	8	8	8	8	9	7	8	8	8	8	9	7	8	8	8	8	9	7	65.8	65.8	65.8	13.466	117	117;122;35	3.59		37	19	11	1				6	5	13	13	12
E5RGS9;Q9NRG0	E5RGS9;Q9NRG0	2;2	2;2	2;2	Chromatin accessibility complex protein 1	CHRAC1	>tr|E5RGS9|E5RGS9_HUMAN Chromatin accessibility complex protein 1 OS=Homo sapiens GN=CHRAC1 PE=1 SV=1;>sp|Q9NRG0|CHRC1_HUMAN Chromatin accessibility complex protein 1 OS=Homo sapiens GN=CHRAC1 PE=1 SV=1	2	2	2	2	1	2	2	1	2	2	1	2	2	1	2	2	1	2	2	1	2	2	46.4	46.4	46.4	6.2643	56	56;131	4.47		6	5							4	2	3	2
H0YC64;E5RGT2;E5RJN2;E5RHU1;E5RJI9;Q96MH6-2;Q96MH6;H0YAY9;H0YAX4;E5RJ96	H0YC64;E5RGT2;E5RJN2;E5RHU1;E5RJI9;Q96MH6-2;Q96MH6;H0YAY9	3;3;3;3;3;3;3;2;1;1	3;3;3;3;3;3;3;2;1;1	3;3;3;3;3;3;3;2;1;1	Transmembrane protein 68	TMEM68	>tr|H0YC64|H0YC64_HUMAN Transmembrane protein 68 (Fragment) OS=Homo sapiens GN=TMEM68 PE=4 SV=1;>tr|E5RGT2|E5RGT2_HUMAN Transmembrane protein 68 OS=Homo sapiens GN=TMEM68 PE=4 SV=1;>tr|E5RJN2|E5RJN2_HUMAN Transmembrane protein 68 OS=Homo sapiens GN=TMEM68	10	3	3	3	3	3	3	3	2	3	3	3	3	3	2	3	3	3	3	3	2	3	23.9	23.9	23.9	15.022	134	134;143;144;182;243;257;324;67;108;164	7.12			6			2	6	6	12		5	7	6
E5RIW3;O75347;E5RJD8;E5RHG6;B4DT30;E5RIX8	E5RIW3;O75347;E5RJD8;E5RHG6;B4DT30	4;4;4;4;3;1	4;4;4;4;3;1	4;4;4;4;3;1	Tubulin-specific chaperone A	TBCA	>tr|E5RIW3|E5RIW3_HUMAN Tubulin-specific chaperone A OS=Homo sapiens GN=TBCA PE=1 SV=1;>sp|O75347|TBCA_HUMAN Tubulin-specific chaperone A OS=Homo sapiens GN=TBCA PE=1 SV=3;>tr|E5RJD8|E5RJD8_HUMAN Tubulin-specific chaperone A OS=Homo sapiens GN=TBCA PE=1 SV	6	4	4	4	3	3	4	4	4	4	3	3	4	4	4	4	3	3	4	4	4	4	31	31	31	10.08	84	84;108;119;131;129;79	3.69		4	25	15	13	1					10	9	8
E5RHG8;Q15369;Q15369-2;R4GMY8	E5RHG8;Q15369;Q15369-2;R4GMY8	7;7;6;4	7;7;6;4	7;7;6;4	Transcription elongation factor B polypeptide 1	TCEB1	>tr|E5RHG8|E5RHG8_HUMAN Transcription elongation factor B polypeptide 1 (Fragment) OS=Homo sapiens GN=TCEB1 PE=1 SV=1;>sp|Q15369|ELOC_HUMAN Transcription elongation factor B polypeptide 1 OS=Homo sapiens GN=TCEB1 PE=1 SV=1;>sp|Q15369-2|ELOC_HUMAN Isoform 2	4	7	7	7	7	7	7	7	7	7	7	7	7	7	7	7	7	7	7	7	7	7	83.1	83.1	83.1	9.9601	89	89;112;96;65	3.67	9	39	13	14	10		11	10			18	19	16
E5RHI2;H0YBA2;O60504-2;O60504;E5RJP2;H0YB51;H0YAZ3;E5RIA0;E5RH58	E5RHI2;H0YBA2;O60504-2;O60504;E5RJP2;H0YB51;H0YAZ3	4;4;4;4;3;3;2;1;1	4;4;4;4;3;3;2;1;1	4;4;4;4;3;3;2;1;1	Vinexin	SORBS3	>tr|E5RHI2|E5RHI2_HUMAN Vinexin (Fragment) OS=Homo sapiens GN=SORBS3 PE=1 SV=2;>tr|H0YBA2|H0YBA2_HUMAN Vinexin (Fragment) OS=Homo sapiens GN=SORBS3 PE=1 SV=2;>sp|O60504-2|VINEX_HUMAN Isoform Beta of Vinexin OS=Homo sapiens GN=SORBS3;>sp|O60504|VINEX_HUMAN	9	4	4	4	4	3	3	3	3	3	4	3	3	3	3	3	4	3	3	3	3	3	18.5	18.5	18.5	28.746	260	260;286;329;671;174;226;186;94;135	5.53			8	6	6	6		5	5		8	7	5
E5RHW4;O94905;E5RJ09;O94905-2;O94905-3	E5RHW4;O94905	11;11;5;3;3	11;11;5;3;3	8;8;4;2;2	Erlin-2	ERLIN2	>tr|E5RHW4|E5RHW4_HUMAN Erlin-2 (Fragment) OS=Homo sapiens GN=ERLIN2 PE=1 SV=1;>sp|O94905|ERLN2_HUMAN Erlin-2 OS=Homo sapiens GN=ERLIN2 PE=1 SV=1	5	11	11	8	10	10	11	11	10	10	10	10	11	11	10	10	7	7	8	8	7	7	42	42	32.8	37.725	338	338;339;197;152;206	5.41	6	24	8	18	13	3	12	19	17	6	23	21	25
E5RI99;P62888;E5RJH3	E5RI99;P62888	7;7;3	7;7;3	7;7;3	60S ribosomal protein L30	RPL30	>tr|E5RI99|E5RI99_HUMAN 60S ribosomal protein L30 (Fragment) OS=Homo sapiens GN=RPL30 PE=1 SV=1;>sp|P62888|RL30_HUMAN 60S ribosomal protein L30 OS=Homo sapiens GN=RPL30 PE=1 SV=2	3	7	7	7	7	7	7	7	7	7	7	7	7	7	7	7	7	7	7	7	7	7	59.6	59.6	59.6	12.656	114	114;115;56	3.26	4	42	50	37	1				1	6	22	22	24
E5RIC9;O15488-5;O15488-4;O15488-3;O15488-6;O15488-2;O15488	E5RIC9;O15488-5;O15488-4;O15488-3;O15488-6;O15488-2;O15488	1;1;1;1;1;1;1	1;1;1;1;1;1;1	1;1;1;1;1;1;1	Glycogenin-2	GYG2	>tr|E5RIC9|E5RIC9_HUMAN Glycogenin-2 (Fragment) OS=Homo sapiens GN=GYG2 PE=4 SV=2;>sp|O15488-5|GLYG2_HUMAN Isoform Epsilon of Glycogenin-2 OS=Homo sapiens GN=GYG2;>sp|O15488-4|GLYG2_HUMAN Isoform Delta of Glycogenin-2 OS=Homo sapiens GN=GYG2;>sp|O15488-3|G	7	1	1	1	1	1	1	1	1	1	1	1	1	1	1	1	1	1	1	1	1	1	10.2	10.2	10.2	15.353	137	137;406;430;461;465;470;501	10										6	1	1	1
E5RIH5;Q6NXR4;E5RHM7	E5RIH5;Q6NXR4	5;5;1	5;5;1	5;5;1	TELO2-interacting protein 2	TTI2	>tr|E5RIH5|E5RIH5_HUMAN TELO2-interacting protein 2 OS=Homo sapiens GN=TTI2 PE=1 SV=1;>sp|Q6NXR4|TTI2_HUMAN TELO2-interacting protein 2 OS=Homo sapiens GN=TTI2 PE=1 SV=1	3	5	5	5	4	5	2	4	5	3	4	5	2	4	5	3	4	5	2	4	5	3	11.3	11.3	11.3	53.305	477	477;508;101	6.9	3	4			2		6		6	9	6	6	3
Q96E29-3;Q96E29-2;E5RIK9;Q96E29	Q96E29-3;Q96E29-2;E5RIK9;Q96E29	2;2;2;2	2;2;2;2	2;2;2;2	mTERF domain-containing protein 1, mitochondrial	MTERFD1	>sp|Q96E29-3|MTER1_HUMAN Isoform 3 of mTERF domain-containing protein 1, mitochondrial OS=Homo sapiens GN=MTERFD1;>sp|Q96E29-2|MTER1_HUMAN Isoform 2 of mTERF domain-containing protein 1, mitochondrial OS=Homo sapiens GN=MTERFD1;>tr|E5RIK9|E5RIK9_HUMAN mTER	4	2	2	2	1	2	2	1	2	2	1	2	2	1	2	2	1	2	2	1	2	2	6.8	6.8	6.8	34.358	296	296;327;361;417	6.91			4						6	1	1	3	2
E5RIP4;Q15043-2;Q15043-3;Q15043;E5RFZ8;E5RGA7;E5RJ40;E5RJG5	E5RIP4;Q15043-2;Q15043-3;Q15043;E5RFZ8;E5RGA7;E5RJ40;E5RJG5	2;2;2;2;1;1;1;1	2;2;2;2;1;1;1;1	2;2;2;2;1;1;1;1	Zinc transporter ZIP14	SLC39A14	>tr|E5RIP4|E5RIP4_HUMAN Zinc transporter ZIP14 (Fragment) OS=Homo sapiens GN=SLC39A14 PE=1 SV=2;>sp|Q15043-2|S39AE_HUMAN Isoform 2 of Zinc transporter ZIP14 OS=Homo sapiens GN=SLC39A14;>sp|Q15043-3|S39AE_HUMAN Isoform 3 of Zinc transporter ZIP14 OS=Homo sa	8	2	2	2	2	2	2	2	2	2	2	2	2	2	2	2	2	2	2	2	2	2	20.6	20.6	20.6	17	155	155;481;492;492;89;90;122;127	7.31						2	21	13			6	5	5
E5RIT6;Q9UNX3;E5RHH1;J3KS10	E5RIT6;Q9UNX3;E5RHH1	8;8;5;3	1;1;1;0	1;1;1;0	60S ribosomal protein L26-like 1	RPL26L1	>tr|E5RIT6|E5RIT6_HUMAN 60S ribosomal protein L26-like 1 (Fragment) OS=Homo sapiens GN=RPL26L1 PE=1 SV=1;>sp|Q9UNX3|RL26L_HUMAN 60S ribosomal protein L26-like 1 OS=Homo sapiens GN=RPL26L1 PE=1 SV=1;>tr|E5RHH1|E5RHH1_HUMAN 60S ribosomal protein L26-like 1 (	4	8	1	1	8	8	8	8	8	8	1	1	1	1	1	1	1	1	1	1	1	1	39.1	7	7	15.207	128	128;145;38;63	4.55		3	6	12	8	4	3	2			8	8	4
E7ERH2;F8W8N3;P63208-2;P63208;E5RJR5;E5RGM3	E7ERH2;F8W8N3;P63208-2;P63208;E5RJR5;E5RGM3	6;6;6;6;6;4	6;6;6;6;6;4	6;6;6;6;6;4	S-phase kinase-associated protein 1	SKP1	>tr|E7ERH2|E7ERH2_HUMAN S-phase kinase-associated protein 1 (Fragment) OS=Homo sapiens GN=SKP1 PE=1 SV=1;>tr|F8W8N3|F8W8N3_HUMAN S-phase kinase-associated protein 1 (Fragment) OS=Homo sapiens GN=SKP1 PE=1 SV=1;>sp|P63208-2|SKP1_HUMAN Isoform 2 of S-phase k	6	6	6	6	6	6	5	5	6	6	6	6	5	5	6	6	6	6	5	5	6	6	36.6	36.6	36.6	16.034	142	142;158;160;163;163;102	4.52	1	22	28	15	4		1	13	12	1	16	16	15
E5RJZ1;H0YBD2;O14548	E5RJZ1;H0YBD2;O14548	1;1;1	1;1;1	1;1;1	Cytochrome c oxidase subunit 7A-related protein, mitochondrial	COX7A2L	>tr|E5RJZ1|E5RJZ1_HUMAN Cytochrome c oxidase subunit 7A-related protein, mitochondrial OS=Homo sapiens GN=COX7A2L PE=1 SV=1;>tr|H0YBD2|H0YBD2_HUMAN Cytochrome c oxidase subunit 7A-related protein, mitochondrial (Fragment) OS=Homo sapiens GN=COX7A2L PE=1 SV	3	1	1	1	1	1	1	1	1	1	1	1	1	1	1	1	1	1	1	1	1	1	16.5	16.5	16.5	8.8399	79	79;95;114	2		6									1	1	1
E7EM64;Q7L5N1;H7C3T0	E7EM64;Q7L5N1	12;12;3	12;12;3	12;12;3	COP9 signalosome complex subunit 6	COPS6	>tr|E7EM64|E7EM64_HUMAN COP9 signalosome complex subunit 6 OS=Homo sapiens GN=COPS6 PE=1 SV=1;>sp|Q7L5N1|CSN6_HUMAN COP9 signalosome complex subunit 6 OS=Homo sapiens GN=COPS6 PE=1 SV=1	3	12	12	12	12	12	11	11	10	10	12	12	11	11	10	10	12	12	11	11	10	10	50.3	50.3	50.3	36.064	326	326;327;123	4.51		23	22	40	40	14	7	6		6	29	30	27
E7EM93;Q9BQG2	E7EM93;Q9BQG2	3;3	3;3	3;3	Peroxisomal NADH pyrophosphatase NUDT12	NUDT12	>tr|E7EM93|E7EM93_HUMAN Peroxisomal NADH pyrophosphatase NUDT12 OS=Homo sapiens GN=NUDT12 PE=4 SV=1;>sp|Q9BQG2|NUD12_HUMAN Peroxisomal NADH pyrophosphatase NUDT12 OS=Homo sapiens GN=NUDT12 PE=1 SV=1	2	3	3	3	0	2	0	1	0	1	0	2	0	1	0	1	0	2	0	1	0	1	6.8	6.8	6.8	50.051	444	444;462	6.75				1	1				2			2
E7EMD6;O43572;J3QRM7	E7EMD6;O43572	3;3;1	3;3;1	3;3;1	A-kinase anchor protein 10, mitochondrial	AKAP10	>tr|E7EMD6|E7EMD6_HUMAN A-kinase anchor protein 10, mitochondrial OS=Homo sapiens GN=AKAP10 PE=1 SV=3;>sp|O43572|AKA10_HUMAN A-kinase anchor protein 10, mitochondrial OS=Homo sapiens GN=AKAP10 PE=1 SV=2	3	3	3	3	3	3	2	2	2	3	3	3	2	2	2	3	3	3	2	2	2	3	6.3	6.3	6.3	67.751	604	604;662;59	6.23		4	2				6	9	1		5	6	3
Q14254;J3QLD9;E7EMK3;K7EKW9	Q14254;J3QLD9;E7EMK3	7;7;7;2	7;7;7;2	7;7;7;2	Flotillin-2	FLOT2	>sp|Q14254|FLOT2_HUMAN Flotillin-2 OS=Homo sapiens GN=FLOT2 PE=1 SV=2;>tr|J3QLD9|J3QLD9_HUMAN Flotillin-2 OS=Homo sapiens GN=FLOT2 PE=1 SV=1;>tr|E7EMK3|E7EMK3_HUMAN Flotillin-2 OS=Homo sapiens GN=FLOT2 PE=1 SV=1	4	7	7	7	4	6	5	4	4	5	4	6	5	4	4	5	4	6	5	4	4	5	22.2	22.2	22.2	47.064	428	428;428;483;249	6.47		7		3	1	4		11	10		5	8	6
E7EMP6;Q96FZ2;D6R9T3;D6RGK7;D6RAI0;D6RAZ3	E7EMP6;Q96FZ2;D6R9T3;D6RGK7;D6RAI0;D6RAZ3	8;8;7;5;4;4	8;8;7;5;4;4	8;8;7;5;4;4	UPF0361 protein C3orf37	C3orf37	>tr|E7EMP6|E7EMP6_HUMAN Embryonic stem cell-specific 5-hydroxymethylcytosine-binding protein OS=Homo sapiens GN=HMCES PE=1 SV=1;>sp|Q96FZ2|HMCES_HUMAN Embryonic stem cell-specific 5-hydroxymethylcytosine-binding protein OS=Homo sapiens GN=HMCES PE=1 SV=1;>	6	8	8	8	7	7	7	7	8	7	7	7	7	7	8	7	7	7	7	7	8	7	30.4	30.4	30.4	35.571	312	312;354;282;183;140;233	6.22	1	13	7	3	4			2	15	13	10	11	9
E7EMT5;P04798;P04798-2	E7EMT5;P04798;P04798-2	2;2;1	2;2;1	2;2;1	Cytochrome P450 1A1	CYP1A1	>tr|E7EMT5|E7EMT5_HUMAN Cytochrome P450 OS=Homo sapiens GN=CYP1A1 PE=3 SV=1;>sp|P04798|CP1A1_HUMAN Cytochrome P450 1A1 OS=Homo sapiens GN=CYP1A1 PE=1 SV=1;>sp|P04798-2|CP1A1_HUMAN Isoform 2 of Cytochrome P450 1A1 OS=Homo sapiens GN=CYP1A1	3	2	2	2	0	0	2	2	0	0	0	0	2	2	0	0	0	0	2	2	0	0	5.8	5.8	5.8	54.799	483	483;512;189	8.5								2	2				2
E7ENQ1;O95819-4;G3XAA2;H7C360;O95819-2;O95819;O95819-5;E7EN19;E7ESS2;O95819-3;G5E948;E7EX83;C9J840;H7C0P6;Q9UKE5-8;Q9UKE5-5;Q9UKE5-7;Q9UKE5-3;F5H5M9;Q9UKE5-6;Q9UKE5-2;F5H865;Q9UKE5-4;Q9UKE5;I3L1U1;H7C3Z6;C9J338	E7ENQ1;O95819-4;G3XAA2;H7C360;O95819-2;O95819;O95819-5;E7EN19;E7ESS2;O95819-3;G5E948;E7EX83;C9J840;H7C0P6;Q9UKE5-8;Q9UKE5-5;Q9UKE5-7;Q9UKE5-3;F5H5M9;Q9UKE5-6;Q9UKE5-2;F5H865;Q9UKE5-4;Q9UKE5	6;6;6;6;6;6;6;6;6;6;6;5;5;4;3;3;3;3;3;3;3;3;3;3;1;1;1	3;3;3;3;3;3;3;3;3;3;3;2;2;2;0;0;0;0;0;0;0;0;0;0;0;1;0	3;3;3;3;3;3;3;3;3;3;3;2;2;2;0;0;0;0;0;0;0;0;0;0;0;1;0	Mitogen-activated protein kinase kinase kinase kinase 4;TRAF2 and NCK-interacting protein kinase	MAP4K4;TNIK	>tr|E7ENQ1|E7ENQ1_HUMAN Mitogen-activated protein kinase kinase kinase kinase 4 OS=Homo sapiens GN=MAP4K4 PE=1 SV=1;>sp|O95819-4|M4K4_HUMAN Isoform 4 of Mitogen-activated protein kinase kinase kinase kinase 4 OS=Homo sapiens GN=MAP4K4;>tr|G3XAA2|G3XAA2_HUM	27	6	3	3	4	4	4	5	4	3	1	1	1	2	1	0	1	1	1	2	1	0	6.9	4	4	132.16	1154	1154;1165;1166;1170;1211;1239;1242;1272;1279;1319;1320;1038;1042;1056;1268;1276;1297;1305;1312;1323;1331;1338;1352;1360;161;258;350	3.17	1	4								1	1	1	1
E7EN46;Q8TB03;Q8TB03-3;Q8TB03-2	E7EN46;Q8TB03;Q8TB03-3;Q8TB03-2	4;4;2;2	4;4;2;2	4;4;2;2	Uncharacterized protein CXorf38	CXorf38	>tr|E7EN46|E7EN46_HUMAN Uncharacterized protein CXorf38 OS=Homo sapiens GN=CXorf38 PE=1 SV=1;>sp|Q8TB03|CX038_HUMAN Uncharacterized protein CXorf38 OS=Homo sapiens GN=CXorf38 PE=1 SV=1;>sp|Q8TB03-3|CX038_HUMAN Isoform 3 of Uncharacterized protein CXorf38 O	4	4	4	4	3	3	4	3	4	4	3	3	4	3	4	4	3	3	4	3	4	4	16.2	16.2	16.2	26.892	234	234;319;155;200	6.69		1	5	5			2	3	11	2	3	4	5
E7EN67;H0YJW4;G3V4C4;O43405;Q96IU6	E7EN67;H0YJW4;G3V4C4;O43405;Q96IU6	3;3;3;3;2	3;3;3;3;2	3;3;3;3;2	Cochlin	COCH	>tr|E7EN67|E7EN67_HUMAN Cochlin OS=Homo sapiens GN=COCH PE=4 SV=1;>tr|H0YJW4|H0YJW4_HUMAN Cochlin (Fragment) OS=Homo sapiens GN=COCH PE=4 SV=1;>tr|G3V4C4|G3V4C4_HUMAN Cochlin OS=Homo sapiens GN=COCH PE=4 SV=1;>sp|O43405|COCH_HUMAN Cochlin OS=Homo sapiens G	5	3	3	3	3	3	3	3	3	3	3	3	3	3	3	3	3	3	3	3	3	3	8.2	8.2	8.2	44.462	401	401;434;438;550;494	4.73			1	12	8	3	2				4	4	5
Q8IZA0-2;E7EN73;Q8IZA0;C9J519;Q8IZA0-3;B1AN15;H0Y4S8	Q8IZA0-2;E7EN73;Q8IZA0;C9J519;Q8IZA0-3	7;7;7;4;4;3;2	7;7;7;4;4;3;2	7;7;7;4;4;3;2	Dyslexia-associated protein KIAA0319-like protein	KIAA0319L	>sp|Q8IZA0-2|K319L_HUMAN Isoform 2 of Dyslexia-associated protein KIAA0319-like protein OS=Homo sapiens GN=KIAA0319L;>tr|E7EN73|E7EN73_HUMAN Dyslexia-associated protein KIAA0319-like protein (Fragment) OS=Homo sapiens GN=KIAA0319L PE=1 SV=1;>sp|Q8IZA0|K319	7	7	7	7	6	7	6	5	6	7	6	7	6	5	6	7	6	7	6	5	6	7	6.9	6.9	6.9	109.75	996	996;1026;1049;486;491;685;304	4.26	4	10	13	10	4	9	5	6			9	13	8
E9PGW7;Q5T8T7;E7EN96;Q5T8T8;Q15528-2;Q15528	E9PGW7;Q5T8T7;E7EN96;Q5T8T8;Q15528-2;Q15528	2;2;2;2;2;2	2;2;2;2;2;2	2;2;2;2;2;2	Mediator of RNA polymerase II transcription subunit 22	MED22	>tr|E9PGW7|E9PGW7_HUMAN Mediator of RNA polymerase II transcription subunit 22 (Fragment) OS=Homo sapiens GN=MED22 PE=1 SV=1;>tr|Q5T8T7|Q5T8T7_HUMAN Mediator complex subunit 22 OS=Homo sapiens GN=MED22 PE=1 SV=1;>tr|E7EN96|E7EN96_HUMAN Mediator of RNA poly	6	2	2	2	1	2	1	2	2	2	1	2	1	2	2	2	1	2	1	2	2	2	26.1	26.1	26.1	12.853	111	111;134;135;137;140;200	6.86						4	8	2			1	4	1
E7END2;P28290-2;E9PHV5;P28290-3;P28290;H7BZ26;E7EUL7	E7END2;P28290-2;E9PHV5;P28290-3;P28290;H7BZ26;E7EUL7	3;3;3;3;3;2;2	3;3;3;3;3;2;2	3;3;3;3;3;2;2	Sperm-specific antigen 2	SSFA2	>tr|E7END2|E7END2_HUMAN Sperm-specific antigen 2 OS=Homo sapiens GN=SSFA2 PE=1 SV=1;>sp|P28290-2|SSFA2_HUMAN Isoform 2 of Sperm-specific antigen 2 OS=Homo sapiens GN=SSFA2;>tr|E9PHV5|E9PHV5_HUMAN Sperm-specific antigen 2 OS=Homo sapiens GN=SSFA2 PE=1 SV=1;	7	3	3	3	2	2	3	3	1	3	2	2	3	3	1	3	2	2	3	3	1	3	3.2	3.2	3.2	119.2	1084	1084;1106;1237;1256;1259;201;768	3	6			4	4						2	2	3
F5H8B7;H0YGK4;F6TFQ5;E7ENF1;Q96C57;F5H7W8;F5H3K2;G5EA44	F5H8B7;H0YGK4;F6TFQ5;E7ENF1;Q96C57;F5H7W8;F5H3K2;G5EA44	2;2;2;2;2;2;1;1	2;2;2;2;2;2;1;1	2;2;2;2;2;2;1;1	Uncharacterized protein C12orf43	C12orf43	>tr|F5H8B7|F5H8B7_HUMAN Uncharacterized protein C12orf43 (Fragment) OS=Homo sapiens GN=C12orf43 PE=1 SV=1;>tr|H0YGK4|H0YGK4_HUMAN Uncharacterized protein C12orf43 (Fragment) OS=Homo sapiens GN=C12orf43 PE=1 SV=1;>tr|F6TFQ5|F6TFQ5_HUMAN Uncharacterized prot	8	2	2	2	1	1	1	1	2	2	1	1	1	1	2	2	1	1	1	1	2	2	13.3	13.3	13.3	19.47	180	180;216;221;232;262;263;188;252	8	2									7	1	1	1
E7ENL1;Q7L5Y9-3;Q7L5Y9;E7ESC7;D6RE80;B4DQT1;B4DVN3;D6RA86;Q7L5Y9-5;D6RDW4;D6REW7;Q7L5Y9-4;D6RIB6;D6RID6	E7ENL1;Q7L5Y9-3;Q7L5Y9;E7ESC7;D6RE80;B4DQT1;B4DVN3	5;5;5;5;4;4;4;2;2;2;2;2;2;1	5;5;5;5;4;4;4;2;2;2;2;2;2;1	1;1;1;1;0;1;1;0;0;0;0;0;0;0	Macrophage erythroblast attacher	MAEA	>tr|E7ENL1|E7ENL1_HUMAN Macrophage erythroblast attacher OS=Homo sapiens GN=MAEA PE=1 SV=1;>sp|Q7L5Y9-3|MAEA_HUMAN Isoform 3 of Macrophage erythroblast attacher OS=Homo sapiens GN=MAEA;>sp|Q7L5Y9|MAEA_HUMAN Macrophage erythroblast attacher OS=Homo sapiens	14	5	5	1	5	5	5	4	4	4	5	5	5	4	4	4	1	1	1	1	0	0	18.9	18.9	2.2	36.332	317	317;355;396;434;183;348;395;107;245;245;274;328;328;115	5.14	6	7						11	4		5	6	5
E7ENN3;Q8NF91-4;E9PEL9;Q8NF91;Q8NF91-8;Q8NF91-2;Q8NF91-7	E7ENN3;Q8NF91-4;E9PEL9;Q8NF91;Q8NF91-8;Q8NF91-2;Q8NF91-7	2;2;2;2;1;1;1	2;2;2;2;1;1;1	2;2;2;2;1;1;1	Nesprin-1	SYNE1	>tr|E7ENN3|E7ENN3_HUMAN Nesprin-1 OS=Homo sapiens GN=SYNE1 PE=1 SV=1;>sp|Q8NF91-4|SYNE1_HUMAN Isoform 4 of Nesprin-1 OS=Homo sapiens GN=SYNE1;>tr|E9PEL9|E9PEL9_HUMAN Nesprin-1 OS=Homo sapiens GN=SYNE1 PE=1 SV=1;>sp|Q8NF91|SYNE1_HUMAN Nesprin-1 OS=Homo sapi	7	2	2	2	2	2	2	2	2	2	2	2	2	2	2	2	2	2	2	2	2	2	0.2	0.2	0.2	966.64	8409	8409;8749;8749;8797;3212;3321;5580	6.41					9	12	14	6			5	6	8
E7ENT5;E7EV45;Q9ULF5	E7ENT5;E7EV45;Q9ULF5	2;2;2	2;2;2	2;2;2	Zinc transporter ZIP10	SLC39A10	>tr|E7ENT5|E7ENT5_HUMAN Zinc transporter ZIP10 (Fragment) OS=Homo sapiens GN=SLC39A10 PE=4 SV=1;>tr|E7EV45|E7EV45_HUMAN Zinc transporter ZIP10 (Fragment) OS=Homo sapiens GN=SLC39A10 PE=4 SV=1;>sp|Q9ULF5|S39AA_HUMAN Zinc transporter ZIP10 OS=Homo sapiens GN	3	2	2	2	2	1	2	2	1	1	2	1	2	2	1	1	2	1	2	2	1	1	14.3	14.3	14.3	14.828	126	126;130;831	8.18								9	2		3	2	2
P55265;P55265-4;E7ENU4;P55265-5;P55265-3;H0YCK3;P55265-2	P55265;P55265-4;E7ENU4;P55265-5;P55265-3;H0YCK3;P55265-2	20;20;20;19;17;17;17	20;20;20;19;17;17;17	20;20;20;19;17;17;17	Double-stranded RNA-specific adenosine deaminase	ADAR	>sp|P55265|DSRAD_HUMAN Double-stranded RNA-specific adenosine deaminase OS=Homo sapiens GN=ADAR PE=1 SV=4;>sp|P55265-4|DSRAD_HUMAN Isoform 4 of Double-stranded RNA-specific adenosine deaminase OS=Homo sapiens GN=ADAR;>tr|E7ENU4|E7ENU4_HUMAN Double-stranded	7	20	20	20	15	18	16	20	18	19	15	18	16	20	18	19	15	18	16	20	18	19	20.1	20.1	20.1	136.06	1226	1226;1269;1269;931;1181;1195;1200	6.4	16	21	12	8	10	12	31	47	23	29	31	34	30
E7EP60;P13612	E7EP60;P13612	1;1	1;1	1;1	Integrin alpha-4	ITGA4	>tr|E7EP60|E7EP60_HUMAN Integrin alpha-4 (Fragment) OS=Homo sapiens GN=ITGA4 PE=3 SV=1;>sp|P13612|ITA4_HUMAN Integrin alpha-4 OS=Homo sapiens GN=ITGA4 PE=1 SV=3	2	1	1	1	1	1	1	1	1	1	1	1	1	1	1	1	1	1	1	1	1	1	1.1	1.1	1.1	67.508	614	614;1032	6.25					4	5	6	1			4	2	3
E9PEZ7;Q9NYB9-2;E7EW77;E7EP65;Q9NYB9-4;Q9NYB9;J3KNB2;Q9NYB9-3;F8WBL5;F8WAQ3;F8WEB9;E7EUA1;F8WAU3;F8WCD7;F8WAZ8;H7C3Q7	E9PEZ7;Q9NYB9-2;E7EW77;E7EP65;Q9NYB9-4;Q9NYB9;J3KNB2;Q9NYB9-3	8;8;8;8;8;8;8;5;2;2;2;1;1;1;1;1	4;4;4;4;4;4;4;2;2;2;2;1;1;1;1;1	4;4;4;4;4;4;4;2;2;2;2;1;1;1;1;1	Abl interactor 2	ABI2	>tr|E9PEZ7|E9PEZ7_HUMAN Abl interactor 2 OS=Homo sapiens GN=ABI2 PE=1 SV=1;>sp|Q9NYB9-2|ABI2_HUMAN Isoform 2 of Abl interactor 2 OS=Homo sapiens GN=ABI2;>tr|E7EW77|E7EW77_HUMAN Abl interactor 2 OS=Homo sapiens GN=ABI2 PE=1 SV=1;>tr|E7EP65|E7EP65_HUMAN Abl	16	8	4	4	8	7	7	7	8	8	4	3	3	4	4	4	4	3	3	4	4	4	18.8	11.1	11.1	49.25	458	458;475;480;486;507;513;513;401;87;97;108;44;53;59;75;201	3.77	5		5	8	11	1					6	4	4
Q9UFG5;E7EP72;K7ENK8;K7EQW1;K7ELZ1;K7ER12;K7EK56;Q9UFG5-2	Q9UFG5;E7EP72;K7ENK8;K7EQW1;K7ELZ1;K7ER12;K7EK56;Q9UFG5-2	2;2;1;1;1;1;1;1	2;2;1;1;1;1;1;1	2;2;1;1;1;1;1;1	UPF0449 protein C19orf25	C19orf25	>sp|Q9UFG5|CS025_HUMAN UPF0449 protein C19orf25 OS=Homo sapiens GN=C19orf25 PE=1 SV=2;>tr|E7EP72|E7EP72_HUMAN UPF0449 protein C19orf25 OS=Homo sapiens GN=C19orf25 PE=4 SV=1;>tr|K7ENK8|K7ENK8_HUMAN UPF0449 protein C19orf25 (Fragment) OS=Homo sapiens GN=C19o	8	2	2	2	2	2	2	2	2	2	2	2	2	2	2	2	2	2	2	2	2	2	24.6	24.6	24.6	12.878	118	118;158;43;71;86;110;160;161	6.31				1	6			6			2	2	3
E7EPB3;P50914	E7EPB3;P50914	6;6	6;6	6;6	60S ribosomal protein L14	RPL14	>tr|E7EPB3|E7EPB3_HUMAN 60S ribosomal protein L14 OS=Homo sapiens GN=RPL14 PE=1 SV=1;>sp|P50914|RL14_HUMAN 60S ribosomal protein L14 OS=Homo sapiens GN=RPL14 PE=1 SV=4	2	6	6	6	6	6	6	6	6	6	6	6	6	6	6	6	6	6	6	6	6	6	48.4	48.4	48.4	14.558	124	124;215	6.21		16	16	12	10	11	27	26	18	11	23	22	26
Q9P2D0-2;E7EPI0;Q9P2D0;E9PDR5;D6R9F4	Q9P2D0-2;E7EPI0;Q9P2D0;E9PDR5;D6R9F4	7;7;7;6;4	7;7;7;6;4	7;7;7;6;4	Inhibitor of Bruton tyrosine kinase	IBTK	>sp|Q9P2D0-2|IBTK_HUMAN Isoform 2 of Inhibitor of Bruton tyrosine kinase OS=Homo sapiens GN=IBTK;>tr|E7EPI0|E7EPI0_HUMAN Inhibitor of Bruton tyrosine kinase OS=Homo sapiens GN=IBTK PE=1 SV=1;>sp|Q9P2D0|IBTK_HUMAN Inhibitor of Bruton tyrosine kinase OS=Homo	5	7	7	7	7	7	7	7	4	5	7	7	7	7	4	5	7	7	7	7	4	5	7	7	7	133.86	1196	1196;1338;1353;1152;238	6.17				9	7	12	16	9			10	10	9
E7EPL4;H3BNZ1;Q6P996;J3KNK7;H3BND4;E7EMH5;Q86XE2;Q6P996-2;Q6P474;H3BNL6;H3BPV5;H3BM88;H3BU11;H3BQ54	E7EPL4;H3BNZ1;Q6P996;J3KNK7;H3BND4;E7EMH5;Q86XE2	28;28;28;27;27;26;14;10;9;5;1;1;1;1	28;28;28;27;27;26;14;10;9;5;1;1;1;1	28;28;28;27;27;26;14;10;9;5;1;1;1;1	Pyridoxal-dependent decarboxylase domain-containing protein 1	PDXDC1	>tr|E7EPL4|E7EPL4_HUMAN Pyridoxal-dependent decarboxylase domain-containing protein 1 OS=Homo sapiens GN=PDXDC1 PE=1 SV=1;>tr|H3BNZ1|H3BNZ1_HUMAN Pyridoxal-dependent decarboxylase domain-containing protein 1 OS=Homo sapiens GN=PDXDC1 PE=1 SV=1;>sp|Q6P996|P	14	28	28	28	26	26	20	28	26	27	26	26	20	28	26	27	26	26	20	28	26	27	52	52	52	83.571	760	760;761;788;773;806;697;498;429;469;271;64;81;120;185	5.18	34	51	12	22	44	54	19	1	7	53	53	53	36
Q9Y520-6;Q9Y520-4;E7EPN9;Q9Y520-5;Q9Y520;Q9Y520-7;Q9Y520-3;Q9Y520-2;H7C5N8	Q9Y520-6;Q9Y520-4;E7EPN9;Q9Y520-5;Q9Y520;Q9Y520-7;Q9Y520-3;Q9Y520-2	32;32;32;32;32;32;30;27;11	32;32;32;32;32;32;30;27;11	30;30;30;30;30;30;28;27;11	Protein PRRC2C	PRRC2C	>sp|Q9Y520-6|PRC2C_HUMAN Isoform 6 of Protein PRRC2C OS=Homo sapiens GN=PRRC2C;>sp|Q9Y520-4|PRC2C_HUMAN Isoform 4 of Protein PRRC2C OS=Homo sapiens GN=PRRC2C;>tr|E7EPN9|E7EPN9_HUMAN Protein PRRC2C OS=Homo sapiens GN=PRRC2C PE=1 SV=1;>sp|Q9Y520-5|PRC2C_HUMA	9	32	32	30	26	28	28	29	27	29	26	28	28	29	27	29	24	26	26	27	25	27	14.3	14.3	13.6	301.57	2752	2752;2817;2819;2849;2896;2898;2700;2653;1300	4.28	12	53	80	59	25	26	18	22	17	1	51	53	53
P19404;E7EPT4	P19404;E7EPT4	5;5	5;5	5;5	NADH dehydrogenase [ubiquinone] flavoprotein 2, mitochondrial	NDUFV2	>sp|P19404|NDUV2_HUMAN NADH dehydrogenase [ubiquinone] flavoprotein 2, mitochondrial OS=Homo sapiens GN=NDUFV2 PE=1 SV=2;>tr|E7EPT4|E7EPT4_HUMAN NADH dehydrogenase [ubiquinone] flavoprotein 2, mitochondrial OS=Homo sapiens GN=NDUFV2 PE=1 SV=1	2	5	5	5	3	4	4	4	5	4	3	4	4	4	5	4	3	4	4	4	5	4	25.7	25.7	25.7	27.391	249	249;252	4.57	8	14	2				7	7	6		5	7	9
E7EQ17;Q155Q3-2;J3KQC9;Q155Q3	E7EQ17;Q155Q3-2;J3KQC9;Q155Q3	1;1;1;1	1;1;1;1	1;1;1;1	Dixin	DIXDC1	>tr|E7EQ17|E7EQ17_HUMAN Dixin OS=Homo sapiens GN=DIXDC1 PE=4 SV=1;>sp|Q155Q3-2|DIXC1_HUMAN Isoform 2 of Dixin OS=Homo sapiens GN=DIXDC1;>tr|J3KQC9|J3KQC9_HUMAN Dixin OS=Homo sapiens GN=DIXDC1 PE=1 SV=1;>sp|Q155Q3|DIXC1_HUMAN Dixin OS=Homo sapiens GN=DIXDC1	4	1	1	1	0	0	1	1	1	1	0	0	1	1	1	1	0	0	1	1	1	1	1.9	1.9	1.9	53.855	471	471;472;682;683	8.6								2	3				1
O14653-3;O14653;O14653-2;E7EQ34;I3L1K7;I3L4Z6;I3L3V4;I3L0K1	O14653-3;O14653;O14653-2;E7EQ34;I3L1K7;I3L4Z6;I3L3V4;I3L0K1	4;4;4;4;3;3;2;2	4;4;4;4;3;3;2;2	4;4;4;4;3;3;2;2	Golgi SNAP receptor complex member 2	GOSR2	>sp|O14653-3|GOSR2_HUMAN Isoform 3 of Golgi SNAP receptor complex member 2 OS=Homo sapiens GN=GOSR2;>sp|O14653|GOSR2_HUMAN Golgi SNAP receptor complex member 2 OS=Homo sapiens GN=GOSR2 PE=1 SV=2;>sp|O14653-2|GOSR2_HUMAN Isoform B of Golgi SNAP receptor com	8	4	4	4	4	4	2	3	3	3	4	4	2	3	3	3	4	4	2	3	3	3	31.3	31.3	31.3	22.724	195	195;212;213;232;143;165;149;199	5		1	2	13	14	4	5	2			8	10	5
E7EQ69;Q9GZZ1;C9J5D1;Q9GZZ1-2;B0AZT5;C9JZU6;F8WCK0;C9J5J3	E7EQ69;Q9GZZ1;C9J5D1;Q9GZZ1-2;B0AZT5	10;10;8;6;5;3;2;2	10;10;8;6;5;3;2;2	10;10;8;6;5;3;2;2	N-alpha-acetyltransferase 50	NAA50	>tr|E7EQ69|E7EQ69_HUMAN N-alpha-acetyltransferase 50 OS=Homo sapiens GN=NAA50 PE=1 SV=1;>sp|Q9GZZ1|NAA50_HUMAN N-alpha-acetyltransferase 50 OS=Homo sapiens GN=NAA50 PE=1 SV=1;>tr|C9J5D1|C9J5D1_HUMAN N-alpha-acetyltransferase 50 OS=Homo sapiens GN=NAA50 PE=	8	10	10	10	10	10	7	9	9	10	10	10	7	9	9	10	10	10	7	9	9	10	57.1	57.1	57.1	19.311	168	168;169;129;81;95;57;48;58	5.65	6	22	9	6	7	5	2	28	15	6	20	19	14
Q9BSV6;E7EQB3;B0V3J0;A9C4B9	Q9BSV6;E7EQB3;B0V3J0;A9C4B9	6;6;5;5	6;6;5;5	6;6;5;5	tRNA-splicing endonuclease subunit Sen34	TSEN34	>sp|Q9BSV6|SEN34_HUMAN tRNA-splicing endonuclease subunit Sen34 OS=Homo sapiens GN=TSEN34 PE=1 SV=1;>tr|E7EQB3|E7EQB3_HUMAN tRNA-splicing endonuclease subunit Sen34 OS=Homo sapiens GN=TSEN34 PE=1 SV=1;>tr|B0V3J0|B0V3J0_HUMAN tRNA-splicing endonuclease subu	4	6	6	6	5	5	4	6	4	6	5	5	4	6	4	6	5	5	4	6	4	6	24.2	24.2	24.2	33.652	310	310;312;242;251	8.77						1	5	7	10	12	6	5	4
Q96PV6;Q96PV6-2;F8W9Q9;E7EQP8	Q96PV6;Q96PV6-2;F8W9Q9;E7EQP8	1;1;1;1	1;1;1;1	1;1;1;1	Leukocyte receptor cluster member 8	LENG8	>sp|Q96PV6|LENG8_HUMAN Leukocyte receptor cluster member 8 OS=Homo sapiens GN=LENG8 PE=1 SV=2;>sp|Q96PV6-2|LENG8_HUMAN Isoform 2 of Leukocyte receptor cluster member 8 OS=Homo sapiens GN=LENG8;>tr|F8W9Q9|F8W9Q9_HUMAN Leukocyte receptor cluster member 8 OS=	4	1	1	1	1	1	1	1	1	1	1	1	1	1	1	1	1	1	1	1	1	1	1.8	1.8	1.8	86.128	779	779;800;837;874	3.4			6	4							2	2	1
P20839;E7EQS0;P20839-3;P20839-7;P20839-5;P20839-6;P20839-2;P20839-4;C9J381;C9K0R9;C9J029;H7C5T1;H7C511	P20839;E7EQS0;P20839-3;P20839-7;P20839-5;P20839-6;P20839-2;P20839-4;C9J381;C9K0R9	12;12;12;12;12;12;11;11;11;7;3;2;2	12;12;12;12;12;12;11;11;11;7;3;2;2	12;12;12;12;12;12;11;11;11;7;3;2;2	Inosine-5-monophosphate dehydrogenase 1;Inosine-5-monophosphate dehydrogenase	IMPDH1	>sp|P20839|IMDH1_HUMAN Inosine-5-monophosphate dehydrogenase 1 OS=Homo sapiens GN=IMPDH1 PE=1 SV=2;>tr|E7EQS0|E7EQS0_HUMAN Inosine-5-monophosphate dehydrogenase OS=Homo sapiens GN=IMPDH1 PE=1 SV=1;>sp|P20839-3|IMDH1_HUMAN Isoform 3 of Inosine-5-monophos	13	12	12	12	12	12	10	11	11	12	12	12	10	11	11	12	12	12	10	11	11	12	35.4	35.4	35.4	55.405	514	514;530;563;566;589;599;489;509;513;289;184;190;226	5.67		19	9		11	25	19	6	11	4	19	17	15
E9PES6;E7ES08;E7EQU1;O15347	E9PES6;E7ES08;E7EQU1;O15347	6;6;6;6	6;6;6;6	6;6;6;6	High mobility group protein B3	HMGB3	>tr|E9PES6|E9PES6_HUMAN High mobility group protein B3 (Fragment) OS=Homo sapiens GN=HMGB3 PE=1 SV=1;>tr|E7ES08|E7ES08_HUMAN High mobility group protein B3 (Fragment) OS=Homo sapiens GN=HMGB3 PE=1 SV=1;>tr|E7EQU1|E7EQU1_HUMAN High mobility group protein B3	4	6	6	6	6	6	5	4	5	6	6	6	5	4	5	6	6	6	5	4	5	6	34.6	34.6	34.6	17.522	153	153;188;193;200	4.28	1	12	16	17	13	8	2		1	4	16	12	11
F8W708;E7ERW0;E7EQU6;E7EWF5;G5E9M9;Q14135-2;Q14135;G5E9F4;Q14135-4;G5E9M7;C9JX59;C9JBN2;E7EUJ2;Q14135-5;Q14135-6	F8W708;E7ERW0;E7EQU6;E7EWF5;G5E9M9;Q14135-2;Q14135;G5E9F4;Q14135-4;G5E9M7;C9JX59;C9JBN2;E7EUJ2;Q14135-5;Q14135-6	2;2;2;2;2;2;2;2;2;2;1;1;1;1;1	2;2;2;2;2;2;2;2;2;2;1;1;1;1;1	2;2;2;2;2;2;2;2;2;2;1;1;1;1;1	Transcription cofactor vestigial-like protein 4	VGLL4	>tr|F8W708|F8W708_HUMAN Transcription cofactor vestigial-like protein 4 (Fragment) OS=Homo sapiens GN=VGLL4 PE=1 SV=1;>tr|E7ERW0|E7ERW0_HUMAN Transcription cofactor vestigial-like protein 4 (Fragment) OS=Homo sapiens GN=VGLL4 PE=1 SV=1;>tr|E7EQU6|E7EQU6_HU	15	2	2	2	2	2	2	2	2	1	2	2	2	2	2	1	2	2	2	2	2	1	12.4	12.4	12.4	18.361	169	169;190;200;223;231;259;290;295;296;296;60;81;127;206;210	6.5				4	5			5	4		2	4	4
E7EQY4;Q9BTC8-2;E7EV10;Q9BTC8;E9PCS8;D6W5A2;E9PF88;H0YIT0	E7EQY4;Q9BTC8-2;E7EV10;Q9BTC8;E9PCS8;D6W5A2	9;9;9;9;7;7;2;1	4;4;4;4;2;3;1;0	4;4;4;4;2;3;1;0	Metastasis-associated protein MTA3	MTA3	>tr|E7EQY4|E7EQY4_HUMAN Metastasis-associated protein MTA3 OS=Homo sapiens GN=MTA3 PE=1 SV=1;>sp|Q9BTC8-2|MTA3_HUMAN Isoform 2 of Metastasis-associated protein MTA3 OS=Homo sapiens GN=MTA3;>tr|E7EV10|E7EV10_HUMAN Metastasis-associated protein MTA3 OS=Homo	8	9	4	4	7	6	8	7	8	7	4	3	4	4	4	4	4	3	4	4	4	4	19.6	8.9	8.9	58.726	514	514;515;590;594;392;537;91;57	5.87			7	5	8	4	2	5	6	1	8	5	5
Q16637-3;Q16637;E7EQZ4;Q16637-4;Q16637-2;B4DP61	Q16637-3;Q16637;E7EQZ4;Q16637-4;Q16637-2	3;3;3;2;2;1	3;3;3;2;2;1	3;3;3;2;2;1	Survival motor neuron protein	SMN1	>sp|Q16637-3|SMN_HUMAN Isoform SMN-delta7 of Survival motor neuron protein OS=Homo sapiens GN=SMN1;>sp|Q16637|SMN_HUMAN Survival motor neuron protein OS=Homo sapiens GN=SMN1 PE=1 SV=1;>tr|E7EQZ4|E7EQZ4_HUMAN Survival motor neuron protein OS=Homo sapiens GN	6	3	3	3	2	2	2	3	3	2	2	2	2	3	3	2	2	2	2	3	3	2	11.3	11.3	11.3	30.45	282	282;294;294;250;262;227	4.33		5	1	3	6	6					3	4	3
Q9UJ41-2;E9PFK9;Q9UJ41-4;Q9UJ41-3;E7ERJ8;Q9UJ41	Q9UJ41-2;E9PFK9;Q9UJ41-4;Q9UJ41-3;E7ERJ8;Q9UJ41	3;3;3;3;3;3	3;3;3;3;3;3	3;3;3;3;3;3	Rab5 GDP/GTP exchange factor	RABGEF1;KCTD7	>sp|Q9UJ41-2|RABX5_HUMAN Isoform 2 of Rab5 GDP/GTP exchange factor OS=Homo sapiens GN=RABGEF1;>tr|E9PFK9|E9PFK9_HUMAN Rab5 GDP/GTP exchange factor OS=Homo sapiens GN=RABGEF1 PE=4 SV=1;>sp|Q9UJ41-4|RABX5_HUMAN Isoform 4 of Rab5 GDP/GTP exchange factor OS=Ho	6	3	3	3	2	3	3	3	2	2	2	3	3	3	2	2	2	3	3	3	2	2	5.7	5.7	5.7	56.89	491	491;504;505;531;531;708	6.56				1	6	4	6	8			4	6	6
Q86VM9-2;Q86VM9;E7ERS3	Q86VM9-2;Q86VM9;E7ERS3	2;2;2	2;2;2	2;2;2	Zinc finger CCCH domain-containing protein 18	ZC3H18	>sp|Q86VM9-2|ZCH18_HUMAN Isoform 2 of Zinc finger CCCH domain-containing protein 18 OS=Homo sapiens GN=ZC3H18;>sp|Q86VM9|ZCH18_HUMAN Zinc finger CCCH domain-containing protein 18 OS=Homo sapiens GN=ZC3H18 PE=1 SV=2;>tr|E7ERS3|E7ERS3_HUMAN Zinc finger CCCH	3	2	2	2	1	1	1	1	2	1	1	1	1	1	2	1	1	1	1	1	2	1	4.1	4.1	4.1	84.099	757	757;953;977	3	6			6	3						3	2	1
O95757;E7ES43;E9PDE8;D6RJ96	O95757;E7ES43;E9PDE8;D6RJ96	21;21;19;14	18;18;16;11	18;18;16;11	Heat shock 70 kDa protein 4L	HSPA4L	>sp|O95757|HS74L_HUMAN Heat shock 70 kDa protein 4L OS=Homo sapiens GN=HSPA4L PE=1 SV=3;>tr|E7ES43|E7ES43_HUMAN Heat shock 70 kDa protein 4L OS=Homo sapiens GN=HSPA4L PE=1 SV=2;>tr|E9PDE8|E9PDE8_HUMAN Heat shock 70 kDa protein 4L OS=Homo sapiens GN=HSPA4L	4	21	18	18	21	21	19	19	20	19	18	18	16	16	17	16	18	18	16	16	17	16	33.8	28.6	28.6	94.511	839	839;870;813;531	4.95	15	25	24	16	5	3	7	22	16	9	25	26	21
Q8IYN9;H0YBP1;Q05397;Q05397-5;J3QT16;E7ESA6;Q05397-2;E9PEI4;Q8N9D7;H0YB16;H0YBZ1;Q05397-6;B4DWJ1;E5RHD8;Q05397-3;E5RI03;Q05397-4;H0YB99;E5RJQ2;E5RG80;E5RJI4;E9PBI4	Q8IYN9;H0YBP1;Q05397;Q05397-5;J3QT16;E7ESA6;Q05397-2;E9PEI4;Q8N9D7;H0YB16;H0YBZ1;Q05397-6;B4DWJ1	13;13;13;13;13;13;12;11;11;11;11;8;8;6;4;3;3;2;1;1;1;1	13;13;13;13;13;13;12;11;11;11;11;8;8;6;4;3;3;2;1;1;1;1	12;12;12;12;12;12;11;10;10;10;10;8;8;6;3;3;2;2;1;1;1;0	Focal adhesion kinase 1	PTK2	>tr|Q8IYN9|Q8IYN9_HUMAN Focal adhesion kinase 1 OS=Homo sapiens GN=PTK2 PE=1 SV=1;>tr|H0YBP1|H0YBP1_HUMAN Focal adhesion kinase 1 (Fragment) OS=Homo sapiens GN=PTK2 PE=1 SV=1;>sp|Q05397|FAK1_HUMAN Focal adhesion kinase 1 OS=Homo sapiens GN=PTK2 PE=1 SV=2;>	22	13	13	12	8	9	9	10	10	9	8	9	9	10	10	9	7	8	8	9	9	8	14.3	14.3	13.5	114.25	1006	1006;1017;1052;1065;1065;1096;879;680;720;724;753;360;362;115;554;120;431;319;132;133;168;596	5.91		2	10	6	16	10	5	9	3	7	10	11	12
Q9Y4E1-5;Q5SNT6;F8W7U3;J3KP36;Q9Y4E1-3;Q9Y4E1-6;E7ESD2;Q9Y4E1-2;Q9Y4E1;Q9Y4E1-4;Q641Q2-2;Q641Q2;B1AP61;F5GY39	Q9Y4E1-5;Q5SNT6;F8W7U3;J3KP36;Q9Y4E1-3;Q9Y4E1-6;E7ESD2;Q9Y4E1-2;Q9Y4E1;Q9Y4E1-4;Q641Q2-2;Q641Q2;B1AP61;F5GY39	2;2;2;2;2;2;2;2;2;2;2;2;1;1	2;2;2;2;2;2;2;2;2;2;2;2;1;1	2;2;2;2;2;2;2;2;2;2;2;2;1;1	WASH complex subunit FAM21B;WASH complex subunit FAM21C;WASH complex subunit FAM21A	FAM21B;FAM21A;FAM21C	>sp|Q9Y4E1-5|FA21C_HUMAN Isoform 5 of WASH complex subunit FAM21C OS=Homo sapiens GN=FAM21C;>sp|Q5SNT6|FA21B_HUMAN WASH complex subunit FAM21B OS=Homo sapiens GN=FAM21B PE=2 SV=2;>tr|F8W7U3|F8W7U3_HUMAN WASH complex subunit FAM21A OS=Homo sapiens GN=FAM21A	14	2	2	2	2	2	2	2	2	2	2	2	2	2	2	2	2	2	2	2	2	2	2.2	2.2	2.2	136.54	1245	1245;1253;1253;1262;1263;1279;1279;1310;1318;1320;1320;1341;156;510	2.44	1	7	8								3	3	3
H7C1S7;H0Y396;H7C3V9;H7C277;Q96I15-2;E7ESG3;Q96I15	H7C1S7;H0Y396;H7C3V9;H7C277;Q96I15-2;E7ESG3;Q96I15	1;1;1;1;1;1;1	1;1;1;1;1;1;1	1;1;1;1;1;1;1	Selenocysteine lyase	SCLY	>tr|H7C1S7|H7C1S7_HUMAN Selenocysteine lyase (Fragment) OS=Homo sapiens GN=SCLY PE=1 SV=1;>tr|H0Y396|H0Y396_HUMAN Selenocysteine lyase OS=Homo sapiens GN=SCLY PE=1 SV=1;>tr|H7C3V9|H7C3V9_HUMAN Selenocysteine lyase (Fragment) OS=Homo sapiens GN=SCLY PE=1 SV	7	1	1	1	1	1	0	0	0	1	1	1	0	0	0	1	1	1	0	0	0	1	10.1	10.1	10.1	17.883	168	168;235;241;251;317;351;445	6.75						1	3				2	1
Q9UPS8-2;Q9UPS8;Q9UPS8-3;E7ESJ3	Q9UPS8-2;Q9UPS8;Q9UPS8-3;E7ESJ3	2;2;2;2	2;2;2;2	2;2;2;2	Ankyrin repeat domain-containing protein 26	ANKRD26	>sp|Q9UPS8-2|ANR26_HUMAN Isoform 2 of Ankyrin repeat domain-containing protein 26 OS=Homo sapiens GN=ANKRD26;>sp|Q9UPS8|ANR26_HUMAN Ankyrin repeat domain-containing protein 26 OS=Homo sapiens GN=ANKRD26 PE=1 SV=3;>sp|Q9UPS8-3|ANR26_HUMAN Isoform 3 of Ankyr	4	2	2	2	2	2	2	2	2	2	2	2	2	2	2	2	2	2	2	2	2	2	2.2	2.2	2.2	148.31	1267	1267;1709;1710;1726	5.06		6				6	3	1	1		3	2	2
Q9NWU5;E7ESL0;J3KQY1;Q9NWU5-2;Q9NWU5-3	Q9NWU5;E7ESL0;J3KQY1;Q9NWU5-2;Q9NWU5-3	6;6;6;5;5	6;6;6;5;5	6;6;6;5;5	39S ribosomal protein L22, mitochondrial	MRPL22	>sp|Q9NWU5|RM22_HUMAN 39S ribosomal protein L22, mitochondrial OS=Homo sapiens GN=MRPL22 PE=1 SV=1;>tr|E7ESL0|E7ESL0_HUMAN 39S ribosomal protein L22, mitochondrial OS=Homo sapiens GN=MRPL22 PE=1 SV=1;>tr|J3KQY1|J3KQY1_HUMAN 39S ribosomal protein L22, mitoc	5	6	6	6	6	5	5	5	5	6	6	5	5	5	5	6	6	5	5	5	5	6	28.2	28.2	28.2	23.64	206	206;212;232;120;126	4.35		24	7	1	8	14	13	1			12	12	7
P20810-9;P20810-5;E7ESM9;P20810-7;P20810-6;E7ES10;P20810-4;E9PCH5;P20810-8;E7EVY3;B7Z574;P20810-2;P20810;B7Z468;P20810-3;E7EQ12;E7EQA0;H0Y7F0;H0YD33;H0Y9H6;E9PDE4;E9PSG1;F8W7E0;H0Y944;D6RBR1;E7EQK6;H0YA91	P20810-9;P20810-5;E7ESM9;P20810-7;P20810-6;E7ES10;P20810-4;E9PCH5;P20810-8;E7EVY3;B7Z574;P20810-2;P20810;B7Z468;P20810-3;E7EQ12;E7EQA0;H0Y7F0;H0YD33;H0Y9H6;E9PDE4	10;10;10;10;10;9;9;9;9;9;9;9;9;9;7;6;6;6;6;6;6;4;4;3;1;1;1	10;10;10;10;10;9;9;9;9;9;9;9;9;9;7;6;6;6;6;6;6;4;4;3;1;1;1	10;10;10;10;10;9;9;9;9;9;9;9;9;9;7;6;6;6;6;6;6;4;4;3;1;1;1	Calpastatin	CAST	>sp|P20810-9|ICAL_HUMAN Isoform 9 of Calpastatin OS=Homo sapiens GN=CAST;>sp|P20810-5|ICAL_HUMAN Isoform 5 of Calpastatin OS=Homo sapiens GN=CAST;>tr|E7ESM9|E7ESM9_HUMAN Calpastatin OS=Homo sapiens GN=CAST PE=1 SV=1;>sp|P20810-7|ICAL_HUMAN Isoform 7 of Cal	27	10	10	10	9	8	9	9	9	10	9	8	9	9	9	10	9	8	9	9	9	10	20.4	20.4	20.4	80.264	750	750;756;769;772;791;642;667;673;686;693;694;695;708;754;590;423;431;436;450;465;636;304;393;288;150;156;301	4.16		35	15	1		4	23	4	1		12	11	17
E7ESP4;E7EMF1;E9PB77;D6RG08	E7ESP4;E7EMF1;E9PB77	25;21;15;3	1;1;1;0	1;1;1;0		ITGA2	>tr|E7ESP4|E7ESP4_HUMAN Integrin alpha-2 OS=Homo sapiens GN=ITGA2 PE=1 SV=1;>tr|E7EMF1|E7EMF1_HUMAN Integrin alpha-2 OS=Homo sapiens GN=ITGA2 PE=1 SV=1;>tr|E9PB77|E9PB77_HUMAN Integrin alpha-2 OS=Homo sapiens GN=ITGA2 PE=1 SV=1	4	25	1	1	25	24	22	24	20	23	1	0	1	1	1	0	1	0	1	1	1	0	35	2.1	2.1	102.83	942	942;815;641;175	2		4									1		1
Q13330-3;E7ESY4;Q13330;Q13330-2;H0Y4T7;F8VSM3;F8W9Y9;H7C3F3	Q13330-3;E7ESY4;Q13330;Q13330-2;H0Y4T7;F8VSM3	11;11;11;8;7;6;3;1	9;9;9;6;5;4;3;1	8;8;8;5;5;4;3;1	Metastasis-associated protein MTA1	MTA1	>sp|Q13330-3|MTA1_HUMAN Isoform 3 of Metastasis-associated protein MTA1 OS=Homo sapiens GN=MTA1;>tr|E7ESY4|E7ESY4_HUMAN Metastasis-associated protein MTA1 OS=Homo sapiens GN=MTA1 PE=1 SV=1;>sp|Q13330|MTA1_HUMAN Metastasis-associated protein MTA1 OS=Homo sa	8	11	9	8	9	9	10	8	9	10	8	8	8	7	8	9	7	7	8	7	7	8	19.9	16.6	14	79.192	698	698;703;715;430;511;228;255;55	5.92			3	16	16	8	5	6	5	5	11	9	11
E7ESZ5;M0QZJ5;M0QZT4;Q6KCM7-6;Q9BV35-4;Q9BV35-2;Q9BV35;Q6KCM7;Q9BV35-3;Q6KCM7-4;Q6KCM7-5;Q6KCM7-2;Q6KCM7-3;M0QZP9;M0R1W8	E7ESZ5;M0QZJ5;M0QZT4;Q6KCM7-6;Q9BV35-4;Q9BV35-2;Q9BV35;Q6KCM7;Q9BV35-3;Q6KCM7-4;Q6KCM7-5;Q6KCM7-2;Q6KCM7-3;M0QZP9;M0R1W8	2;2;2;2;2;2;2;2;2;2;2;2;2;1;1	2;2;2;2;2;2;2;2;2;2;2;2;2;1;1	2;2;2;2;2;2;2;2;2;2;2;2;2;1;1	Calcium-binding mitochondrial carrier protein SCaMC-3;Calcium-binding mitochondrial carrier protein SCaMC-2	SLC25A23;SLC25A25	>tr|E7ESZ5|E7ESZ5_HUMAN Calcium-binding mitochondrial carrier protein SCaMC-3 OS=Homo sapiens GN=SLC25A23 PE=3 SV=1;>tr|M0QZJ5|M0QZJ5_HUMAN Calcium-binding mitochondrial carrier protein SCaMC-3 (Fragment) OS=Homo sapiens GN=SLC25A23 PE=3 SV=1;>tr|M0QZT4|M0	15	2	2	2	1	0	0	1	1	2	1	0	0	1	1	2	1	0	0	1	1	2	7	7	7	25.026	229	229;236;278;366;435;438;468;469;482;489;501;503;515;99;216	7.67		2							5	2	1
O95299;E7ESZ7;Q8WXC9;Q8N1B9;C9J6X0;H7C2W5;H7C1Y7;H7C2X4	O95299;E7ESZ7;Q8WXC9;Q8N1B9;C9J6X0	5;5;5;3;3;1;1;1	5;5;5;3;3;1;1;1	5;5;5;3;3;1;1;1	NADH dehydrogenase [ubiquinone] 1 alpha subcomplex subunit 10, mitochondrial	NDUFA10	>sp|O95299|NDUAA_HUMAN NADH dehydrogenase [ubiquinone] 1 alpha subcomplex subunit 10, mitochondrial OS=Homo sapiens GN=NDUFA10 PE=1 SV=1;>tr|E7ESZ7|E7ESZ7_HUMAN NADH dehydrogenase [ubiquinone] 1 alpha subcomplex subunit 10, mitochondrial OS=Homo sapiens GN	8	5	5	5	4	4	4	3	4	4	4	4	4	3	4	4	4	4	4	3	4	4	18.9	18.9	18.9	40.75	355	355;390;429;201;244;129;133;138	5.21		6	4	10	2			1	10		7	7	6
E7ET07;Q9NXR8	E7ET07;Q9NXR8	1;1	1;1	1;1	Inhibitor of growth protein 3	ING3	>tr|E7ET07|E7ET07_HUMAN Inhibitor of growth protein 3 OS=Homo sapiens GN=ING3 PE=1 SV=1;>sp|Q9NXR8|ING3_HUMAN Inhibitor of growth protein 3 OS=Homo sapiens GN=ING3 PE=1 SV=2	2	1	1	1	1	1	1	1	1	1	1	1	1	1	1	1	1	1	1	1	1	1	3.5	3.5	3.5	44.86	403	403;418	3.25			6	2							2	2	1
E7ET48	E7ET48	7	7	7		AIM1L	>tr|E7ET48|E7ET48_HUMAN Absent in melanoma 1-like protein (Fragment) OS=Homo sapiens GN=AIM1L PE=4 SV=1	1	7	7	7	6	5	5	7	6	6	6	5	5	7	6	6	6	5	5	7	6	6	20.2	20.2	20.2	49.276	466	466	6.42		6	3	6		9	11	6		11	8	7	7
E7ET89;Q86UW9-2;Q86UW9;C9JEH4;C9JII1	E7ET89;Q86UW9-2;Q86UW9;C9JEH4;C9JII1	2;2;2;1;1	2;2;2;1;1	2;2;2;1;1	Probable E3 ubiquitin-protein ligase DTX2	DTX2	>tr|E7ET89|E7ET89_HUMAN Probable E3 ubiquitin-protein ligase DTX2 OS=Homo sapiens GN=DTX2 PE=1 SV=1;>sp|Q86UW9-2|DTX2_HUMAN Isoform 2 of Probable E3 ubiquitin-protein ligase DTX2 OS=Homo sapiens GN=DTX2;>sp|Q86UW9|DTX2_HUMAN Probable E3 ubiquitin-protein l	5	2	2	2	2	2	2	2	2	2	2	2	2	2	2	2	2	2	2	2	2	2	4.3	4.3	4.3	57.296	531	531;575;622;108;140	8.21						1	5	6	12		4	4	6
Q9ULA0;E7ETB3;E7EMB6	Q9ULA0;E7ETB3;E7EMB6	16;16;14	16;16;14	8;8;8	Aspartyl aminopeptidase	DNPEP	>sp|Q9ULA0|DNPEP_HUMAN Aspartyl aminopeptidase OS=Homo sapiens GN=DNPEP PE=1 SV=1;>tr|E7ETB3|E7ETB3_HUMAN Aspartyl aminopeptidase OS=Homo sapiens GN=DNPEP PE=1 SV=1;>tr|E7EMB6|E7EMB6_HUMAN Aspartyl aminopeptidase OS=Homo sapiens GN=DNPEP PE=1 SV=1	3	16	16	8	16	16	15	14	15	14	16	16	15	14	15	14	8	8	8	8	8	7	41.7	41.7	20.4	52.428	475	475;493;410	6.34		27	20	19	9	17	24	21	53	15	35	35	41
E7ETD6;Q12830-4;Q12830-2;Q12830;F5GXF5;J3QQK4;J3QQQ8;J3KSK9;E9PE19	E7ETD6;Q12830-4;Q12830-2;Q12830;F5GXF5	7;7;7;7;6;2;1;1;1	7;7;7;7;6;2;1;1;1	7;7;7;7;6;2;1;1;1	Nucleosome-remodeling factor subunit BPTF	BPTF	>tr|E7ETD6|E7ETD6_HUMAN Nucleosome-remodeling factor subunit BPTF OS=Homo sapiens GN=BPTF PE=1 SV=3;>sp|Q12830-4|BPTF_HUMAN Isoform 4 of Nucleosome-remodeling factor subunit BPTF OS=Homo sapiens GN=BPTF;>sp|Q12830-2|BPTF_HUMAN Isoform 2 of Nucleosome-remod	9	7	7	7	4	5	4	3	4	5	4	5	4	3	4	5	4	5	4	3	4	5	2.9	2.9	2.9	308.07	2764	2764;2903;2920;3046;2457;339;420;484;650	6.83			5	8	3		2		10	8	7	6	6
P62847-2;E7ETK0;P62847-3;P62847;P62847-4	P62847-2;E7ETK0;P62847-3;P62847;P62847-4	5;5;5;5;5	5;5;5;5;5	5;5;5;5;5	40S ribosomal protein S24	RPS24	>sp|P62847-2|RS24_HUMAN Isoform 2 of 40S ribosomal protein S24 OS=Homo sapiens GN=RPS24;>tr|E7ETK0|E7ETK0_HUMAN 40S ribosomal protein S24 OS=Homo sapiens GN=RPS24 PE=1 SV=1;>sp|P62847-3|RS24_HUMAN Isoform 3 of 40S ribosomal protein S24 OS=Homo sapiens GN=R	5	5	5	5	5	5	5	5	5	5	5	5	5	5	5	5	5	5	5	5	5	5	36.2	36.2	36.2	15.069	130	130;131;132;133;289	5.81		15	7	6	24	34	27	11	6	6	21	20	26
P09001;H0Y9G6;E7ETU7;D6RC14;E9PF06;D6RBQ5	P09001;H0Y9G6;E7ETU7;D6RC14;E9PF06	9;9;9;6;6;1	9;9;9;6;6;1	9;9;9;6;6;1	39S ribosomal protein L3, mitochondrial	MRPL3	>sp|P09001|RM03_HUMAN 39S ribosomal protein L3, mitochondrial OS=Homo sapiens GN=MRPL3 PE=1 SV=1;>tr|H0Y9G6|H0Y9G6_HUMAN 39S ribosomal protein L3, mitochondrial (Fragment) OS=Homo sapiens GN=MRPL3 PE=1 SV=1;>tr|E7ETU7|E7ETU7_HUMAN 39S ribosomal protein L3,	6	9	9	9	9	9	8	8	9	9	9	9	8	8	9	9	9	9	8	8	9	9	30.7	30.7	30.7	38.632	348	348;363;375;155;176;28	5.93	12	15	13	7	11	7	9	16	14	23	20	22	21
E7ETZ4;Q9Y6E2;Q75MG1;B5MCH7;B5MCE7;E7EMS9;E9PFD4;C9JF98;F8WDX8	E7ETZ4;Q9Y6E2;Q75MG1;B5MCH7;B5MCE7	24;24;17;17;14;11;9;9;9	24;24;17;17;14;11;9;9;9	23;23;17;16;13;11;9;9;9	Basic leucine zipper and W2 domain-containing protein 2	BZW2	>tr|E7ETZ4|E7ETZ4_HUMAN Basic leucine zipper and W2 domain-containing protein 2 (Fragment) OS=Homo sapiens GN=BZW2 PE=1 SV=1;>sp|Q9Y6E2|BZW2_HUMAN Basic leucine zipper and W2 domain-containing protein 2 OS=Homo sapiens GN=BZW2 PE=1 SV=1;>tr|Q75MG1|Q75MG1_H	9	24	24	23	24	24	21	23	23	23	24	24	21	23	23	23	23	23	20	22	22	22	58.6	58.6	56.9	46.913	408	408;419;274;343;225;208;161;162;170	3.92	25	59	76	60	27	15	12	2	6	19	51	49	45
P50395;E7EU23;P50395-2;Q5SX87;Q5SX91;V9GYF8;Q5SX90;V9GYJ7	P50395;E7EU23;P50395-2;Q5SX87	32;32;28;18;11;9;9;8	32;32;28;18;11;9;9;8	15;15;15;4;5;1;1;1	Rab GDP dissociation inhibitor beta	GDI2	>sp|P50395|GDIB_HUMAN Rab GDP dissociation inhibitor beta OS=Homo sapiens GN=GDI2 PE=1 SV=2;>tr|E7EU23|E7EU23_HUMAN Rab GDP dissociation inhibitor beta OS=Homo sapiens GN=GDI2 PE=1 SV=1;>sp|P50395-2|GDIB_HUMAN Isoform 2 of Rab GDP dissociation inhibitor be	8	32	32	15	31	31	32	31	28	31	31	31	32	31	28	31	15	14	15	15	14	15	75.3	75.3	39.6	50.663	445	445;449;400;263;203;130;148;125	5.25	53	81	87	44	13	30	40	50	89	38	86	90	85
E7EU96;P68400;Q8NEV1;P68400-2;V9GYA2;V9GY80;V9GYW6	E7EU96;P68400;Q8NEV1;P68400-2	18;18;15;10;4;4;1	18;18;15;10;4;4;1	18;18;15;10;4;4;1	Casein kinase II subunit alpha;Casein kinase II subunit alpha 3	CSNK2A1;CSNK2A3	>tr|E7EU96|E7EU96_HUMAN Casein kinase II subunit alpha OS=Homo sapiens GN=CSNK2A1 PE=1 SV=1;>sp|P68400|CSK21_HUMAN Casein kinase II subunit alpha OS=Homo sapiens GN=CSNK2A1 PE=1 SV=1;>sp|Q8NEV1|CSK23_HUMAN Casein kinase II subunit alpha 3 OS=Homo sapiens G	7	18	18	18	18	18	16	18	17	17	18	18	16	18	17	17	18	18	16	18	17	17	56.1	56.1	56.1	45.31	385	385;391;391;255;74;79;27	4.34		81	64	46	51	37	3	21	24		58	55	58
F5GYC1;P28288;E7EUE1;P28288-2;P28288-3	F5GYC1;P28288;E7EUE1;P28288-2	20;20;20;13;3	20;20;20;13;3	20;20;20;13;3	ATP-binding cassette sub-family D member 3	ABCD3	>tr|F5GYC1|F5GYC1_HUMAN ATP-binding cassette sub-family D member 3 OS=Homo sapiens GN=ABCD3 PE=1 SV=1;>sp|P28288|ABCD3_HUMAN ATP-binding cassette sub-family D member 3 OS=Homo sapiens GN=ABCD3 PE=1 SV=1;>tr|E7EUE1|E7EUE1_HUMAN ATP-binding cassette sub-fami	5	20	20	20	20	19	16	18	17	18	20	19	16	18	17	18	20	19	16	18	17	18	37.7	37.7	37.7	67.315	586	586;659;683;549;236	5.22	3	41	21	23	17	28	16	6	20	17	27	34	33
E7EUM5;Q7Z3B4-3;Q7Z3B4;Q7Z3B4-2	E7EUM5;Q7Z3B4-3;Q7Z3B4;Q7Z3B4-2	11;11;11;9	11;11;11;9	11;11;11;9	Nucleoporin p54	NUP54	>tr|E7EUM5|E7EUM5_HUMAN Nucleoporin p54 OS=Homo sapiens GN=NUP54 PE=1 SV=2;>sp|Q7Z3B4-3|NUP54_HUMAN Isoform 3 of Nucleoporin p54 OS=Homo sapiens GN=NUP54;>sp|Q7Z3B4|NUP54_HUMAN Nucleoporin p54 OS=Homo sapiens GN=NUP54 PE=1 SV=2;>sp|Q7Z3B4-2|NUP54_HUMAN Iso	4	11	11	11	8	10	10	9	9	10	8	10	10	9	9	10	8	10	10	9	9	10	40.4	40.4	40.4	37.349	327	327;459;507;291	5		12	4	25	30	7	15	1	6	1	13	20	13
E7EUU4;Q04637-8;E7EX73;E9PGM1;Q04637-3;Q04637;Q04637-9;Q04637-7;Q04637-5;Q04637-4;Q04637-6;C9JF13;C9K073;C9J6B6;C9J2Z7;H7C044;H7C0V6;C9JHW9;F8WCF2;C9JIH5;C9JWH9	E7EUU4;Q04637-8;E7EX73;E9PGM1;Q04637-3;Q04637;Q04637-9;Q04637-7;Q04637-5;Q04637-4;Q04637-6	45;45;44;44;44;44;44;43;43;43;42;16;15;14;14;10;6;2;1;1;1	45;45;44;44;44;44;44;43;43;43;42;16;15;14;14;10;6;2;1;1;1	41;41;40;40;40;40;40;39;39;39;38;13;15;13;14;9;6;2;1;1;1	Eukaryotic translation initiation factor 4 gamma 1	EIF4G1	>tr|E7EUU4|E7EUU4_HUMAN Eukaryotic translation initiation factor 4 gamma 1 OS=Homo sapiens GN=EIF4G1 PE=1 SV=1;>sp|Q04637-8|IF4G1_HUMAN Isoform 8 of Eukaryotic translation initiation factor 4 gamma 1 OS=Homo sapiens GN=EIF4G1;>tr|E7EX73|E7EX73_HUMAN Eukary	21	45	45	41	42	43	40	41	42	44	42	43	40	41	42	44	38	39	36	37	38	40	31.6	31.6	29.2	171.64	1560	1560;1600;1436;1513;1559;1599;1606;1404;1435;1512;1403;903;869;757;833;226;180;160;50;87;143	5.43	37	76	85	98	40	44	80	70	58	55	103	105	104
P27816-6;P27816;E7EVA0;P27816-2;P27816-4;E9PGM5;P27816-5;B9ZVR1;H7C4C5;B5MEG9;H0Y2V1;F8W9U4;B4DSQ1;H7C456;P27816-7	P27816-6;P27816;E7EVA0;P27816-2;P27816-4;E9PGM5;P27816-5;B9ZVR1	28;28;28;24;17;17;15;15;13;13;11;11;8;2;1	28;28;28;24;17;17;15;15;13;13;11;11;8;2;1	28;28;28;24;17;17;15;15;13;13;11;11;8;2;1	Microtubule-associated protein 4;Microtubule-associated protein	MAP4	>sp|P27816-6|MAP4_HUMAN Isoform 6 of Microtubule-associated protein 4 OS=Homo sapiens GN=MAP4;>sp|P27816|MAP4_HUMAN Microtubule-associated protein 4 OS=Homo sapiens GN=MAP4 PE=1 SV=3;>tr|E7EVA0|E7EVA0_HUMAN Microtubule-associated protein OS=Homo sapiens GN	15	28	28	28	25	25	28	25	26	26	25	25	28	25	26	26	25	25	28	25	26	26	29.3	29.3	29.3	119.96	1135	1135;1152;2297;979;872;887;809;811;493;711;463;828;249;290;99	3.85	5	86	75	53	45	27	11	1	5	9	52	54	56
Q676U5-5;Q676U5-2;Q676U5;E7EVC7;Q676U5-3;Q676U5-4;C9JAY7;C9JK97;C9J1B2	Q676U5-5;Q676U5-2;Q676U5;E7EVC7;Q676U5-3;Q676U5-4	9;9;9;9;7;6;2;2;2	9;9;9;9;7;6;2;2;2	9;9;9;9;7;6;2;2;2	Autophagy-related protein 16-1	ATG16L1	>sp|Q676U5-5|A16L1_HUMAN Isoform 5 of Autophagy-related protein 16-1 OS=Homo sapiens GN=ATG16L1;>sp|Q676U5-2|A16L1_HUMAN Isoform 2 of Autophagy-related protein 16-1 OS=Homo sapiens GN=ATG16L1;>sp|Q676U5|A16L1_HUMAN Autophagy-related protein 16-1 OS=Homo sa	9	9	9	9	9	9	8	8	8	7	9	9	8	8	8	7	9	9	8	8	8	7	22.3	22.3	22.3	49.485	444	444;588;607;624;470;428;164;177;187	4.53		1	14	19	23	16					12	13	12
E7EVD1;O43395;B4DSY9	E7EVD1;O43395	8;8;3	8;8;3	8;8;3	U4/U6 small nuclear ribonucleoprotein Prp3	PRPF3	>tr|E7EVD1|E7EVD1_HUMAN U4/U6 small nuclear ribonucleoprotein Prp3 OS=Homo sapiens GN=PRPF3 PE=1 SV=1;>sp|O43395|PRPF3_HUMAN U4/U6 small nuclear ribonucleoprotein Prp3 OS=Homo sapiens GN=PRPF3 PE=1 SV=2	3	8	8	8	7	8	7	7	6	8	7	8	7	7	6	8	7	8	7	7	6	8	14.5	14.5	14.5	72.075	634	634;683;281	4.88		24	17	13	7		6	13	13	1	15	18	18
E7EVJ5;Q96F07-2;E7EVF4;F5H583;Q96F07;E7EWA4;E7EW33;H7C229;E5RJW3;H0YNP0;E5RFQ0	E7EVJ5;Q96F07-2;E7EVF4;F5H583;Q96F07;E7EWA4;E7EW33;H7C229	20;20;20;19;19;19;16;13;1;1;1	1;1;1;1;1;1;0;0;0;0;0	1;1;1;1;1;1;0;0;0;0;0	Cytoplasmic FMR1-interacting protein 2	CYFIP2	>tr|E7EVJ5|E7EVJ5_HUMAN Cytoplasmic FMR1-interacting protein 2 OS=Homo sapiens GN=CYFIP2 PE=1 SV=1;>sp|Q96F07-2|CYFP2_HUMAN Isoform 2 of Cytoplasmic FMR1-interacting protein 2 OS=Homo sapiens GN=CYFIP2;>tr|E7EVF4|E7EVF4_HUMAN Cytoplasmic FMR1-interacting p	11	20	1	1	20	19	16	19	17	18	1	1	1	1	1	1	1	1	1	1	1	1	17.9	1.1	1.1	142.58	1227	1227;1253;1253;1178;1278;1278;1057;952;71;77;95	6.38					1	6	6				2	2	2
Q86U86-6;H0Y5B5;E7EVG2;Q86U86-5;Q86U86-4;Q86U86-7;Q86U86-3;Q86U86-9;Q86U86-2;Q86U86-8;Q86U86	Q86U86-6;H0Y5B5;E7EVG2;Q86U86-5;Q86U86-4;Q86U86-7;Q86U86-3;Q86U86-9;Q86U86-2;Q86U86-8;Q86U86	3;3;3;3;3;3;3;3;3;3;3	3;3;3;3;3;3;3;3;3;3;3	3;3;3;3;3;3;3;3;3;3;3	Protein polybromo-1	PBRM1	>sp|Q86U86-6|PB1_HUMAN Isoform 6 of Protein polybromo-1 OS=Homo sapiens GN=PBRM1;>tr|H0Y5B5|H0Y5B5_HUMAN Protein polybromo-1 (Fragment) OS=Homo sapiens GN=PBRM1 PE=1 SV=1;>tr|E7EVG2|E7EVG2_HUMAN Protein polybromo-1 (Fragment) OS=Homo sapiens GN=PBRM1 PE=1	11	3	3	3	2	3	1	3	1	3	2	3	1	3	1	3	2	3	1	3	1	3	4.3	4.3	4.3	99.141	856	856;1085;1460;1582;1582;1597;1602;1609;1634;1652;1689	5.15	4			2	3					4	2	3	1
E7EVH9;Q08623-3;Q08623;Q08623-4;Q08623-2	E7EVH9;Q08623-3;Q08623;Q08623-4;Q08623-2	9;9;9;8;6	9;9;9;8;6	9;9;9;8;6	Pseudouridine-5-monophosphatase	HDHD1	>tr|E7EVH9|E7EVH9_HUMAN Pseudouridine-5-monophosphatase (Fragment) OS=Homo sapiens GN=HDHD1 PE=1 SV=1;>sp|Q08623-3|HDHD1_HUMAN Isoform 3 of Pseudouridine-5-monophosphatase OS=Homo sapiens GN=HDHD1;>sp|Q08623|HDHD1_HUMAN Pseudouridine-5-monophosphatase O	5	9	9	9	9	9	6	8	8	9	9	9	6	8	8	9	9	9	6	8	8	9	51.8	51.8	51.8	21.466	191	191;208;228;251;185	7.43		6	5	14	6		3	21	32	22	20	17	14
E7EVK2;U3KQ69;Q9BT17;E9PI62;Q9BT17-2	E7EVK2;U3KQ69;Q9BT17;E9PI62;Q9BT17-2	7;7;7;7;5	7;7;7;7;5	7;7;7;7;5	Mitochondrial GTPase 1	MTG1	>tr|E7EVK2|E7EVK2_HUMAN Mitochondrial GTPase 1 OS=Homo sapiens GN=MTG1 PE=3 SV=1;>tr|U3KQ69|U3KQ69_HUMAN Mitochondrial GTPase 1 OS=Homo sapiens GN=MTG1 PE=3 SV=1;>sp|Q9BT17|MTG1_HUMAN Mitochondrial ribosome-associated GTPase 1 OS=Homo sapiens GN=MTG1 PE=1	5	7	7	7	3	5	5	6	4	5	3	5	5	6	4	5	3	5	5	6	4	5	27.2	27.2	27.2	31.677	283	283;293;334;339;267	4.62		7	23	1	1	3	3		4	5	5	9	7
E7EVQ6;Q14534;H0YBN7;E5RJH9	E7EVQ6;Q14534;H0YBN7	7;7;4;1	7;7;4;1	7;7;4;1	Squalene monooxygenase	SQLE	>tr|E7EVQ6|E7EVQ6_HUMAN Squalene monooxygenase OS=Homo sapiens GN=SQLE PE=1 SV=1;>sp|Q14534|ERG1_HUMAN Squalene monooxygenase OS=Homo sapiens GN=SQLE PE=1 SV=3;>tr|H0YBN7|H0YBN7_HUMAN Squalene monooxygenase (Fragment) OS=Homo sapiens GN=SQLE PE=1 SV=1	4	7	7	7	6	7	5	5	6	6	6	7	5	5	6	6	6	7	5	5	6	6	19.2	19.2	19.2	53.067	479	479;574;163;184	5.7	6	10					7	13	8		6	8	6
H0YBX1;E7EW18;P06746;H0YAV8;B7Z1W5;E5RIJ0;H0YBJ0	H0YBX1;E7EW18;P06746;H0YAV8;B7Z1W5	3;3;3;2;2;1;1	3;3;3;2;2;1;1	3;3;3;2;2;1;1	DNA polymerase beta	POLB	>tr|H0YBX1|H0YBX1_HUMAN DNA polymerase beta (Fragment) OS=Homo sapiens GN=POLB PE=4 SV=1;>tr|E7EW18|E7EW18_HUMAN DNA polymerase beta (Fragment) OS=Homo sapiens GN=POLB PE=4 SV=1;>sp|P06746|DPOLB_HUMAN DNA polymerase beta OS=Homo sapiens GN=POLB PE=1 SV=3;>	7	3	3	3	2	3	3	3	3	3	2	3	3	3	3	3	2	3	3	3	3	3	15.1	15.1	15.1	27.02	239	239;280;335;106;181;193;237	6.29	1	6					7	1	9		3	4	3
Q9UM54-6;E7EW20;Q9UM54-4;Q9UM54-1;Q9UM54;Q5JVM0	Q9UM54-6;E7EW20;Q9UM54-4;Q9UM54-1;Q9UM54	33;33;32;32;32;1	33;33;32;32;32;1	1;1;0;0;0;0	Unconventional myosin-VI	MYO6	>sp|Q9UM54-6|MYO6_HUMAN Isoform 6 of Unconventional myosin-VI OS=Homo sapiens GN=MYO6;>tr|E7EW20|E7EW20_HUMAN Unconventional myosin-VI OS=Homo sapiens GN=MYO6 PE=1 SV=1;>sp|Q9UM54-4|MYO6_HUMAN Isoform 4 of Unconventional myosin-VI OS=Homo sapiens GN=MYO6;>	6	33	33	1	25	26	27	27	30	29	25	26	27	27	30	29	1	1	1	1	1	1	32.1	32.1	1.3	148.66	1285	1285;1286;1285;1285;1294;174	5.31	20	43	27	22	46	41	19	52	29	6	50	46	50
E7EW80;Q13356;Q13356-2	E7EW80;Q13356;Q13356-2	6;6;6	6;6;6	6;6;6	Peptidyl-prolyl cis-trans isomerase-like 2	PPIL2	>tr|E7EW80|E7EW80_HUMAN Peptidyl-prolyl cis-trans isomerase-like 2 OS=Homo sapiens GN=PPIL2 PE=1 SV=1;>sp|Q13356|PPIL2_HUMAN Peptidyl-prolyl cis-trans isomerase-like 2 OS=Homo sapiens GN=PPIL2 PE=1 SV=1;>sp|Q13356-2|PPIL2_HUMAN Isoform 2 of Peptidyl-prolyl	3	6	6	6	1	3	4	2	3	3	1	3	4	2	3	3	1	3	4	2	3	3	13.1	13.1	13.1	55.749	489	489;520;527	7.32	1	3						7	4	4	1	4	4
Q13576-3;Q13576-2;F5H7S7;E7EWC2;Q13576;E9PDT6;D6RDK8;D6R939	Q13576-3;Q13576-2;F5H7S7;E7EWC2;Q13576;E9PDT6	4;4;4;4;4;2;1;1	2;2;2;2;2;1;1;1	2;2;2;2;2;1;1;1	Ras GTPase-activating-like protein IQGAP2	IQGAP2	>sp|Q13576-3|IQGA2_HUMAN Isoform 3 of Ras GTPase-activating-like protein IQGAP2 OS=Homo sapiens GN=IQGAP2;>sp|Q13576-2|IQGA2_HUMAN Isoform 2 of Ras GTPase-activating-like protein IQGAP2 OS=Homo sapiens GN=IQGAP2;>tr|F5H7S7|F5H7S7_HUMAN Ras GTPase-activatin	8	4	2	2	3	3	3	3	4	4	1	1	1	1	2	2	1	1	1	1	2	2	3.1	1.6	1.6	122.8	1071	1071;1071;1077;1402;1575;509;167;824	5.55		2	2		3	6	6	1			2	3	3
G3V1E1;E9PQT3;P17405-3;E7EWE2;P17405-2;G3XAB5;P17405-4;P17405;E9PL59;E9PPK6;H0YEP5	G3V1E1;E9PQT3;P17405-3;E7EWE2;P17405-2;G3XAB5;P17405-4;P17405;E9PL59;E9PPK6;H0YEP5	2;2;2;2;2;2;2;2;1;1;1	2;2;2;2;2;2;2;2;1;1;1	2;2;2;2;2;2;2;2;1;1;1	Sphingomyelin phosphodiesterase	SMPD1	>tr|G3V1E1|G3V1E1_HUMAN Sphingomyelin phosphodiesterase OS=Homo sapiens GN=SMPD1 PE=4 SV=1;>tr|E9PQT3|E9PQT3_HUMAN Sphingomyelin phosphodiesterase OS=Homo sapiens GN=SMPD1 PE=4 SV=1;>sp|P17405-3|ASM_HUMAN Isoform 3 of Sphingomyelin phosphodiesterase OS=Hom	11	2	2	2	2	2	1	2	2	2	2	2	1	2	2	2	2	2	1	2	2	2	5.7	5.7	5.7	39.842	366	366;402;573;575;585;587;628;629;52;171;317	9.5									6	6	2	2	1
E7EWK2;P78552	E7EWK2;P78552	2;2	2;2	2;2	Interleukin-13 receptor subunit alpha-1	IL13RA1	>tr|E7EWK2|E7EWK2_HUMAN Interleukin-13 receptor subunit alpha-1 OS=Homo sapiens GN=IL13RA1 PE=4 SV=1;>sp|P78552|I13R1_HUMAN Interleukin-13 receptor subunit alpha-1 OS=Homo sapiens GN=IL13RA1 PE=1 SV=1	2	2	2	2	1	0	0	0	1	1	1	0	0	0	1	1	1	0	0	0	1	1	11.1	11.1	11.1	24.805	226	226;427	4	2									1	1
E7EWM1	E7EWM1	1	1	1		NCOA2	>tr|E7EWM1|E7EWM1_HUMAN Nuclear receptor coactivator 2 OS=Homo sapiens GN=NCOA2 PE=1 SV=2	1	1	1	1	1	1	1	1	1	1	1	1	1	1	1	1	1	1	1	1	1	1	1.3	1.3	1.3	102.73	946	946	2.33		7	1	1							1	2	1
E9PH64;E7EWZ0;Q9Y6M9;E9PF49	E9PH64;E7EWZ0;Q9Y6M9;E9PF49	3;3;3;3	3;3;3;3	3;3;3;3	NADH dehydrogenase [ubiquinone] 1 beta subcomplex subunit 9	NDUFB9	>tr|E9PH64|E9PH64_HUMAN NADH dehydrogenase [ubiquinone] 1 beta subcomplex subunit 9 OS=Homo sapiens GN=NDUFB9 PE=1 SV=1;>tr|E7EWZ0|E7EWZ0_HUMAN NADH dehydrogenase [ubiquinone] 1 beta subcomplex subunit 9 OS=Homo sapiens GN=NDUFB9 PE=1 SV=1;>sp|Q9Y6M9|NDUB9	4	3	3	3	3	2	2	2	2	3	3	2	2	2	2	3	3	2	2	2	2	3	19	19	19	20.383	168	168;178;179;221	5.24			4	8					5		4	3	2
P23588;E7EX17;B4DS13;F8VX11;F8VP89;F8VRU1;F8VYE9;F8VSC7;F8W0K0	P23588;E7EX17;B4DS13;F8VX11;F8VP89	10;10;9;8;5;4;4;4;3	10;10;9;8;5;4;4;4;3	10;10;9;8;5;4;4;4;3	Eukaryotic translation initiation factor 4B	EIF4B	>sp|P23588|IF4B_HUMAN Eukaryotic translation initiation factor 4B OS=Homo sapiens GN=EIF4B PE=1 SV=2;>tr|E7EX17|E7EX17_HUMAN Eukaryotic translation initiation factor 4B OS=Homo sapiens GN=EIF4B PE=1 SV=1;>tr|B4DS13|B4DS13_HUMAN Eukaryotic translation initi	9	10	10	10	10	9	9	8	10	9	10	9	9	8	10	9	10	9	9	8	10	9	17	17	17	69.15	611	611;616;572;360;275;175;185;227;169	5.54		3	12	26	17	39	43	4			28	24	25
Q05682-5;E7EX44;Q05682-3;E9PGZ1;Q05682-4;F5H1Z9;Q05682-6;Q05682-2;Q05682;C9J813;C9JEK3	Q05682-5;E7EX44;Q05682-3;E9PGZ1;Q05682-4;F5H1Z9;Q05682-6;Q05682-2;Q05682;C9J813	12;12;12;11;11;11;11;11;11;8;1	12;12;12;11;11;11;11;11;11;8;1	12;12;12;11;11;11;11;11;11;8;1	Caldesmon	CALD1	>sp|Q05682-5|CALD1_HUMAN Isoform 5 of Caldesmon OS=Homo sapiens GN=CALD1;>tr|E7EX44|E7EX44_HUMAN Caldesmon OS=Homo sapiens GN=CALD1 PE=1 SV=1;>sp|Q05682-3|CALD1_HUMAN Isoform 3 of Caldesmon OS=Homo sapiens GN=CALD1;>tr|E9PGZ1|E9PGZ1_HUMAN Caldesmon OS=Homo	11	12	12	12	12	12	12	12	12	12	12	12	12	12	12	12	12	12	12	12	12	12	23.5	23.5	23.5	61.212	532	532;557;558;536;538;543;563;564;793;459;132	2.84	12	51	38	20	12	3					20	22	26
O14786-3;E7EX60;O14786-2;Q5T7F0;E9PEP6;O14786;Q5JWQ4;Q5JWQ6;H0Y4A0	O14786-3;E7EX60;O14786-2;Q5T7F0;E9PEP6;O14786;Q5JWQ4;Q5JWQ6	7;7;7;7;7;7;5;5;1	7;7;7;7;7;7;5;5;1	7;7;7;7;7;7;5;5;1	Neuropilin-1	NRP1	>sp|O14786-3|NRP1_HUMAN Isoform 3 of Neuropilin-1 OS=Homo sapiens GN=NRP1;>tr|E7EX60|E7EX60_HUMAN Neuropilin-1 OS=Homo sapiens GN=NRP1 PE=4 SV=1;>sp|O14786-2|NRP1_HUMAN Isoform 2 of Neuropilin-1 OS=Homo sapiens GN=NRP1;>tr|Q5T7F0|Q5T7F0_HUMAN Neuropilin-1	9	7	7	7	6	7	4	6	5	3	6	7	4	6	5	3	6	7	4	6	5	3	15.1	15.1	15.1	68.375	609	609;641;644;704;906;923;597;735;170	5.45	5			7	4		9	8			6	7	6
Q14203-3;Q14203-4;E7EX90;Q14203-6;Q14203;Q14203-5;Q14203-2;Q6AWB1;E7EWF7;C9JZA4;C9JTE5;C9JJN7;C9JJD0;C9JKG6;E9PCY0;C9J1B7	Q14203-3;Q14203-4;E7EX90;Q14203-6;Q14203;Q14203-5;Q14203-2	31;31;31;30;30;28;27;15;9;3;3;3;3;3;3;2	31;31;31;30;30;28;27;15;9;3;3;3;3;3;3;2	31;31;31;30;30;28;27;15;9;3;3;3;3;3;3;2	Dynactin subunit 1	DCTN1	>sp|Q14203-3|DCTN1_HUMAN Isoform 3 of Dynactin subunit 1 OS=Homo sapiens GN=DCTN1;>sp|Q14203-4|DCTN1_HUMAN Isoform 4 of Dynactin subunit 1 OS=Homo sapiens GN=DCTN1;>tr|E7EX90|E7EX90_HUMAN Uncharacterized protein OS=Homo sapiens GN=DCTN1 PE=1 SV=1;>sp|Q1420	16	31	31	31	27	28	25	27	31	28	27	28	25	27	31	28	27	28	25	27	31	28	36.8	36.8	36.8	136.82	1236	1236;1253;1256;1271;1278;1139;1144;890;191;76;76;87;121;135;186;64	5.64	35	46	21	17	9	5	31	59	55	12	52	50	42
E9PAU2;Q8IY67-2;Q8IY67;K7EKR9;Q8IY67-3;K7EKA4;K7EQG2	E9PAU2;Q8IY67-2;Q8IY67	18;17;14;3;2;2;1	18;17;14;3;2;2;1	18;17;14;3;2;2;1	Ribonucleoprotein PTB-binding 1	RAVER1	>tr|E9PAU2|E9PAU2_HUMAN Ribonucleoprotein PTB-binding 1 OS=Homo sapiens GN=RAVER1 PE=1 SV=1;>sp|Q8IY67-2|RAVR1_HUMAN Isoform 2 of Ribonucleoprotein PTB-binding 1 OS=Homo sapiens GN=RAVER1;>sp|Q8IY67|RAVR1_HUMAN Ribonucleoprotein PTB-binding 1 OS=Homo sapie	7	18	18	18	18	17	15	16	16	17	18	17	15	16	16	17	18	17	15	16	16	17	34.4	34.4	34.4	79.578	756	756;739;606;96;75;156;157	5.71	11	26	12	12	6	24	23	13	24	14	32	29	26
F8VZJ2;H0YHX9;Q13765;E9PAV3-2;E9PAV3;F8W0W4;F8W1N5;F8VNW4;F8VZ58;Q9BZK3	F8VZJ2;H0YHX9;Q13765;E9PAV3-2;E9PAV3;F8W0W4;F8W1N5;F8VNW4	6;6;6;6;6;5;4;4;2;1	6;6;6;6;6;5;4;4;2;1	6;6;6;6;6;5;4;4;2;1	Nascent polypeptide-associated complex subunit alpha	NACA	>tr|F8VZJ2|F8VZJ2_HUMAN Nascent polypeptide-associated complex subunit alpha, muscle-specific form OS=Homo sapiens GN=NACA PE=1 SV=1;>tr|H0YHX9|H0YHX9_HUMAN Nascent polypeptide-associated complex subunit alpha, muscle-specific form (Fragment) OS=Homo sapie	10	6	6	6	6	6	5	6	6	6	6	6	5	6	6	6	6	6	5	6	6	6	56.6	56.6	56.6	15.016	136	136;213;215;925;2078;198;71;148;126;213	4.76		29	16	23	8	8	10	5	3	12	17	21	20
F8W895;E9PAV9;Q5T3I0;Q5T3I0-3;E9PPY4;F2Z3C6	F8W895;E9PAV9;Q5T3I0;Q5T3I0-3;E9PPY4;F2Z3C6	2;2;2;2;1;1	2;2;2;2;1;1	2;2;2;2;1;1	G patch domain-containing protein 4	GPATCH4	>tr|F8W895|F8W895_HUMAN G patch domain-containing protein 4 (Fragment) OS=Homo sapiens GN=GPATCH4 PE=1 SV=1;>tr|E9PAV9|E9PAV9_HUMAN G patch domain-containing protein 4 OS=Homo sapiens GN=GPATCH4 PE=1 SV=1;>sp|Q5T3I0|GPTC4_HUMAN G patch domain-containing pr	6	2	2	2	1	2	2	2	2	2	1	2	2	2	2	2	1	2	2	2	2	2	9.5	9.5	9.5	29.465	264	264;375;446;451;119;143	2	6	4	1	1	1						1	2	3
H7C5W6;E9PB09;Q86XA9-2;Q86XA9;F5H619;H0YIW3;B5MC49	H7C5W6;E9PB09;Q86XA9-2;Q86XA9;F5H619	3;3;3;3;3;1;1	3;3;3;3;3;1;1	3;3;3;3;3;1;1	HEAT repeat-containing protein 5A	HEATR5A	>tr|H7C5W6|H7C5W6_HUMAN HEAT repeat-containing protein 5A (Fragment) OS=Homo sapiens GN=HEATR5A PE=1 SV=1;>tr|E9PB09|E9PB09_HUMAN HEAT repeat-containing protein 5A OS=Homo sapiens GN=HEATR5A PE=1 SV=1;>sp|Q86XA9-2|HTR5A_HUMAN Isoform 2 of HEAT repeat-conta	7	3	3	3	3	3	2	2	3	3	3	3	2	2	3	3	3	3	2	2	3	3	2.5	2.5	2.5	174.02	1599	1599;1753;1965;2040;2046;896;1140	9							5	4	1	14	5	4	3
Q9BXS6-7;E9PB35;Q9BXS6-4;Q9BXS6-6;Q9BXS6-3;Q9BXS6-5;Q9BXS6-2;Q9BXS6;H0YKA7;H0YMD2	Q9BXS6-7;E9PB35;Q9BXS6-4;Q9BXS6-6;Q9BXS6-3;Q9BXS6-5;Q9BXS6-2;Q9BXS6;H0YKA7;H0YMD2	2;2;2;2;2;2;2;2;1;1	2;2;2;2;2;2;2;2;1;1	2;2;2;2;2;2;2;2;1;1	Nucleolar and spindle-associated protein 1	NUSAP1	>sp|Q9BXS6-7|NUSAP_HUMAN Isoform 7 of Nucleolar and spindle-associated protein 1 OS=Homo sapiens GN=NUSAP1;>tr|E9PB35|E9PB35_HUMAN Nucleolar and spindle-associated protein 1 OS=Homo sapiens GN=NUSAP1 PE=1 SV=1;>sp|Q9BXS6-4|NUSAP_HUMAN Isoform 4 of Nucleola	10	2	2	2	2	2	2	2	2	2	2	2	2	2	2	2	2	2	2	2	2	2	6.3	6.3	6.3	42.351	378	378;402;425;426;439;440;440;441;76;144	6.37					1	11	6	1			3	3	3
Q86V81;E9PB61	Q86V81;E9PB61	6;6	6;6	6;6	THO complex subunit 4	ALYREF	>sp|Q86V81|THOC4_HUMAN THO complex subunit 4 OS=Homo sapiens GN=ALYREF PE=1 SV=3;>tr|E9PB61|E9PB61_HUMAN THO complex subunit 4 OS=Homo sapiens GN=ALYREF PE=1 SV=1	2	6	6	6	5	6	5	5	6	6	5	6	5	5	6	6	5	6	5	5	6	6	33.1	33.1	33.1	26.888	257	257;264	5.48		24	17	9	1	1	3	20	24		17	16	14
E9PB93;O15514;E9PHV4	E9PB93;O15514;E9PHV4	2;2;1	2;2;1	2;2;1	DNA-directed RNA polymerase II subunit RPB4	POLR2D	>tr|E9PB93|E9PB93_HUMAN DNA-directed RNA polymerase II subunit RPB4 OS=Homo sapiens GN=POLR2D PE=1 SV=1;>sp|O15514|RPB4_HUMAN DNA-directed RNA polymerase II subunit RPB4 OS=Homo sapiens GN=POLR2D PE=1 SV=1;>tr|E9PHV4|E9PHV4_HUMAN DNA-directed RNA polymeras	3	2	2	2	2	2	1	2	2	2	2	2	1	2	2	2	2	2	1	2	2	2	24	24	24	12.267	104	104;142;110	3.79		9			6	4					4	3	2
F6PQP6;E9PBC1;I3L2B2;O95208-2;O95208;J3KSF8;J3KTF6;J3QRG9;J3KSA6;J3KSC7;J3QLN2;I3L356;I3L2H1;O95208-5;O95208-3	F6PQP6;E9PBC1;I3L2B2;O95208-2;O95208;J3KSF8;J3KTF6;J3QRG9;J3KSA6;J3KSC7;J3QLN2;I3L356;I3L2H1;O95208-5;O95208-3	2;2;2;2;2;1;1;1;1;1;1;1;1;1;1	2;2;2;2;2;1;1;1;1;1;1;1;1;1;1	2;2;2;2;2;1;1;1;1;1;1;1;1;1;1	Epsin-2	EPN2	>tr|F6PQP6|F6PQP6_HUMAN Epsin-2 (Fragment) OS=Homo sapiens GN=EPN2 PE=1 SV=2;>tr|E9PBC1|E9PBC1_HUMAN Epsin-2 OS=Homo sapiens GN=EPN2 PE=4 SV=1;>tr|I3L2B2|I3L2B2_HUMAN Epsin-2 OS=Homo sapiens GN=EPN2 PE=1 SV=1;>sp|O95208-2|EPN2_HUMAN Isoform 2 of Epsin-2 OS	15	2	2	2	0	1	1	2	2	1	0	1	1	2	2	1	0	1	1	2	2	1	5.1	5.1	5.1	44.888	409	409;484;577;584;641;32;38;39;62;75;95;251;349;356;545	1.75	3	4	1									1	1
Q8N511;E9PBQ3;J3KS81;J3KRW7	Q8N511;E9PBQ3;J3KS81	3;3;2;1	3;3;2;1	3;3;2;1	Transmembrane protein 199	TMEM199	>sp|Q8N511|TM199_HUMAN Transmembrane protein 199 OS=Homo sapiens GN=TMEM199 PE=1 SV=1;>tr|E9PBQ3|E9PBQ3_HUMAN Transmembrane protein 199 OS=Homo sapiens GN=TMEM199 PE=1 SV=1;>tr|J3KS81|J3KS81_HUMAN Transmembrane protein 199 OS=Homo sapiens GN=TMEM199 PE=1 S	4	3	3	3	3	2	2	3	1	1	3	2	2	3	1	1	3	2	2	3	1	1	19.7	19.7	19.7	23.13	208	208;299;125;89	3.57		4	8						2		3	2	3
E9PC15;Q53H12;E9PG39	E9PC15;Q53H12;E9PG39	13;13;10	13;13;10	13;13;10	Acylglycerol kinase, mitochondrial	AGK	>tr|E9PC15|E9PC15_HUMAN Acylglycerol kinase, mitochondrial OS=Homo sapiens GN=AGK PE=1 SV=1;>sp|Q53H12|AGK_HUMAN Acylglycerol kinase, mitochondrial OS=Homo sapiens GN=AGK PE=1 SV=2;>tr|E9PG39|E9PG39_HUMAN Acylglycerol kinase, mitochondrial OS=Homo sapiens	3	13	13	13	13	12	12	12	13	13	13	12	12	12	13	13	13	12	12	12	13	13	40.6	40.6	40.6	43.796	394	394;422;244	7.18		6	1	14	7	18	30	26	46	6	28	26	23
Q7KZI7-11;E9PC69;Q7KZI7-8;Q7KZI7;Q7KZI7-15;Q7KZI7-5;Q7KZI7-16;Q7KZI7-4;Q7KZI7-9;Q7KZI7-12;Q7KZI7-14;Q7KZI7-3;Q7KZI7-6;Q7KZI7-10;Q7KZI7-13;Q7KZI7-7;E7ETY4;Q7KZI7-2;F5H4F6;F5H6N2;Q9P0L2-2;Q9P0L2-3;K7EK17;K7EKG8;F5H4J8;H0YKP9;A2SY06;Q96L34-2;Q96L34	Q7KZI7-11;E9PC69;Q7KZI7-8;Q7KZI7;Q7KZI7-15;Q7KZI7-5;Q7KZI7-16;Q7KZI7-4;Q7KZI7-9;Q7KZI7-12;Q7KZI7-14;Q7KZI7-3;Q7KZI7-6;Q7KZI7-10;Q7KZI7-13;Q7KZI7-7;E7ETY4;Q7KZI7-2	14;14;14;14;13;13;13;13;13;13;13;13;13;12;12;12;12;12;4;3;3;3;1;1;1;1;1;1;1	14;14;14;14;13;13;13;13;13;13;13;13;13;12;12;12;12;12;4;3;3;3;1;1;1;1;1;1;1	9;9;9;9;8;8;8;8;8;8;8;8;8;7;7;7;7;7;2;2;0;0;0;0;1;0;0;0;0	Serine/threonine-protein kinase MARK2	MARK2	>sp|Q7KZI7-11|MARK2_HUMAN Isoform 11 of Serine/threonine-protein kinase MARK2 OS=Homo sapiens GN=MARK2;>tr|E9PC69|E9PC69_HUMAN Serine/threonine-protein kinase MARK2 OS=Homo sapiens GN=MARK2 PE=1 SV=3;>sp|Q7KZI7-8|MARK2_HUMAN Isoform 8 of Serine/threonine-p	29	14	14	9	11	12	11	11	14	12	11	12	11	11	14	12	8	8	8	9	9	8	19.8	19.8	13.3	86.128	773	773;778;779;788;709;719;724;725;734;740;745;746;755;686;691;692;699;701;161;111;645;758;62;74;91;222;331;688;752	3.66	5	36	13	18	14	11	4		1	2	17	19	17
E9PC74;Q13144;C9JRD9;H7C2X0	E9PC74;Q13144	15;15;2;1	15;15;2;1	15;15;2;1	Translation initiation factor eIF-2B subunit epsilon	EIF2B5	>tr|E9PC74|E9PC74_HUMAN Translation initiation factor eIF-2B subunit epsilon OS=Homo sapiens GN=EIF2B5 PE=1 SV=1;>sp|Q13144|EI2BE_HUMAN Translation initiation factor eIF-2B subunit epsilon OS=Homo sapiens GN=EIF2B5 PE=1 SV=3	4	15	15	15	14	14	11	14	15	14	14	14	11	14	15	14	14	14	11	14	15	14	29.2	29.2	29.2	78.346	705	705;721;107;92	5	10	30	9	7	7	11	10	12	12	8	21	21	14
O94876-2;E9PC87;O94876;Q6N039	O94876-2;E9PC87;O94876;Q6N039	2;2;2;1	2;2;2;1	2;2;2;1	Transmembrane and coiled-coil domains protein 1	TMCC1;DKFZp686H13261	>sp|O94876-2|TMCC1_HUMAN Isoform 2 of Transmembrane and coiled-coil domains protein 1 OS=Homo sapiens GN=TMCC1;>tr|E9PC87|E9PC87_HUMAN Transmembrane and coiled-coil domains protein 1 OS=Homo sapiens GN=TMCC1 PE=1 SV=1;>sp|O94876|TMCC1_HUMAN Transmembrane a	4	2	2	2	1	1	1	1	2	2	1	1	1	1	2	2	1	1	1	1	2	2	4.6	4.6	4.6	53.003	474	474;539;653;329	4.33	2			3	5	1	1				2	2	1
H0YA68;Q9Y2E5-2;E9PCD7;Q9Y2E5	H0YA68;Q9Y2E5-2;E9PCD7;Q9Y2E5	1;1;1;1	1;1;1;1	1;1;1;1	Epididymis-specific alpha-mannosidase	MAN2B2	>tr|H0YA68|H0YA68_HUMAN Epididymis-specific alpha-mannosidase (Fragment) OS=Homo sapiens GN=MAN2B2 PE=4 SV=1;>sp|Q9Y2E5-2|MA2B2_HUMAN Isoform 2 of Epididymis-specific alpha-mannosidase OS=Homo sapiens GN=MAN2B2;>tr|E9PCD7|E9PCD7_HUMAN Epididymis-specific a	4	1	1	1	0	0	1	0	0	0	0	0	1	0	0	0	0	0	1	0	0	0	1	1	1	107.51	953	953;954;958;1009	7							1						1
Q8TEU7;Q8TEU7-4;E9PCH4;D6RE77;B7Z7Y1;Q8TEU7-2;Q8TEU7-5;Q8TEU7-3;Q8TEU7-6;Q9Y4G8	Q8TEU7;Q8TEU7-4;E9PCH4;D6RE77;B7Z7Y1;Q8TEU7-2;Q8TEU7-5;Q8TEU7-3	5;5;5;4;4;4;4;4;2;2	5;5;5;4;4;4;4;4;2;2	4;4;4;3;3;3;3;3;1;1	Rap guanine nucleotide exchange factor 6	RAPGEF6;FNIP1	>sp|Q8TEU7|RPGF6_HUMAN Rap guanine nucleotide exchange factor 6 OS=Homo sapiens GN=RAPGEF6 PE=1 SV=2;>sp|Q8TEU7-4|RPGF6_HUMAN Isoform 4 of Rap guanine nucleotide exchange factor 6 OS=Homo sapiens GN=RAPGEF6;>tr|E9PCH4|E9PCH4_HUMAN Uncharacterized protein O	10	5	5	4	5	5	5	5	5	5	5	5	5	5	5	5	4	4	4	4	4	4	3.7	3.7	3.1	179.42	1601	1601;1609;1651;1114;1204;1391;1504;1509;827;1499	6.58		3	4		7	7	1	2	8	6	6	5	6
Q9UJX5;E9PCR4;Q9UJX5-2;D6RFM7;D6RAP6	Q9UJX5;E9PCR4;Q9UJX5-2	8;8;5;2;2	8;8;5;2;2	8;8;5;2;2	Anaphase-promoting complex subunit 4	ANAPC4	>sp|Q9UJX5|APC4_HUMAN Anaphase-promoting complex subunit 4 OS=Homo sapiens GN=ANAPC4 PE=1 SV=2;>tr|E9PCR4|E9PCR4_HUMAN Anaphase-promoting complex subunit 4 OS=Homo sapiens GN=ANAPC4 PE=1 SV=1;>sp|Q9UJX5-2|APC4_HUMAN Isoform 2 of Anaphase-promoting complex	5	8	8	8	6	6	6	7	6	6	6	6	6	7	6	6	6	6	6	7	6	6	12.7	12.7	12.7	92.115	808	808;809;551;83;162	7.02	6	2	3	2			6	13	20	4	9	9	9
F5H801;Q02218-2;Q02218;E9PDF2;E9PCR7;E9PFG7;Q02218-3;C9J4G7	F5H801;Q02218-2;Q02218;E9PDF2;E9PCR7;E9PFG7	31;31;31;31;31;25;13;4	31;31;31;31;31;25;13;4	25;25;25;25;25;20;11;3	2-oxoglutarate dehydrogenase, mitochondrial	OGDH	>tr|F5H801|F5H801_HUMAN 2-oxoglutarate dehydrogenase, mitochondrial OS=Homo sapiens GN=OGDH PE=1 SV=1;>sp|Q02218-2|ODO1_HUMAN Isoform 2 of 2-oxoglutarate dehydrogenase, mitochondrial OS=Homo sapiens GN=OGDH;>sp|Q02218|ODO1_HUMAN 2-oxoglutarate dehydrogenas	8	31	31	25	28	30	29	29	30	29	28	30	29	29	30	29	22	24	23	23	24	24	36.2	36.2	30.3	110.61	974	974;1019;1023;1034;1038;873;427;211	4.94	14	52	67	50	23	14	26	16	21	36	54	54	54
E9PCW1;O95249;K7EJC8;G5E9T8;O95249-2;B4DQA8;F6RU00	E9PCW1;O95249;K7EJC8;G5E9T8;O95249-2;B4DQA8	8;8;7;7;6;5;2	8;8;7;7;6;5;2	8;8;7;7;6;5;2	Golgi SNAP receptor complex member 1	GOSR1	>tr|E9PCW1|E9PCW1_HUMAN Golgi SNAP receptor complex member 1 OS=Homo sapiens GN=GOSR1 PE=1 SV=1;>sp|O95249|GOSR1_HUMAN Golgi SNAP receptor complex member 1 OS=Homo sapiens GN=GOSR1 PE=1 SV=1;>tr|K7EJC8|K7EJC8_HUMAN Golgi SNAP receptor complex member 1 OS=H	7	8	8	8	8	8	7	8	7	7	8	8	7	8	7	7	8	8	7	8	7	7	32.3	32.3	32.3	28.293	248	248;250;236;255;185;174;81	4.42		28	24	3	6	6	13	4	2	6	14	18	16
E9PD53;Q9NTJ3;Q9NTJ3-2;C9JR83;C9J9E4;C9JVD8;C9J578;C9JWF0;C9IYK2;C9JJ64	E9PD53;Q9NTJ3;Q9NTJ3-2	35;35;32;11;6;4;4;3;3;3	35;35;32;11;6;4;4;3;3;3	35;35;32;11;6;4;4;3;3;3	Structural maintenance of chromosomes protein;Structural maintenance of chromosomes protein 4	SMC4	>tr|E9PD53|E9PD53_HUMAN Structural maintenance of chromosomes protein OS=Homo sapiens GN=SMC4 PE=1 SV=1;>sp|Q9NTJ3|SMC4_HUMAN Structural maintenance of chromosomes protein 4 OS=Homo sapiens GN=SMC4 PE=1 SV=2;>sp|Q9NTJ3-2|SMC4_HUMAN Isoform 2 of Structural	10	35	35	35	31	31	27	32	30	32	31	31	27	32	30	32	31	31	27	32	30	32	31.5	31.5	31.5	144.45	1263	1263;1288;1230;423;157;119;139;170;173;180	4.4	57	55	47	47	22	19	36	19	9	29	59	60	51
Q8WWK9-4;E9PD90;Q8WWK9-5;Q8WWK9	Q8WWK9-4;E9PD90;Q8WWK9-5;Q8WWK9	1;1;1;1	1;1;1;1	1;1;1;1	Cytoskeleton-associated protein 2	CKAP2	>sp|Q8WWK9-4|CKAP2_HUMAN Isoform 2 of Cytoskeleton-associated protein 2 OS=Homo sapiens GN=CKAP2;>tr|E9PD90|E9PD90_HUMAN Cytoskeleton-associated protein 2 OS=Homo sapiens GN=CKAP2 PE=1 SV=1;>sp|Q8WWK9-5|CKAP2_HUMAN Isoform 3 of Cytoskeleton-associated prot	4	1	1	1	1	1	1	1	1	1	1	1	1	1	1	1	1	1	1	1	1	1	3.4	3.4	3.4	55.307	494	494;634;682;683	10										6	1	1	1
Q15811-12;Q15811-11;Q15811-3;F8W7U0;Q15811-10;Q15811-7;Q15811-2;Q15811-4;Q15811-9;Q15811-8;Q15811;E9PD98;Q15811-13;Q15811-6;Q15811-5;CON__ENSEMBL:ENSBTAP00000001528	Q15811-12;Q15811-11;Q15811-3;F8W7U0;Q15811-10;Q15811-7;Q15811-2;Q15811-4;Q15811-9;Q15811-8;Q15811;E9PD98;Q15811-13;Q15811-6;Q15811-5;CON__ENSEMBL:ENSBTAP00000001528	2;2;2;2;2;2;2;2;2;2;2;2;1;1;1;1	2;2;2;2;2;2;2;2;2;2;2;2;1;1;1;1	2;2;2;2;2;2;2;2;2;2;2;2;1;1;1;1	Intersectin-1	ITSN1	>sp|Q15811-12|ITSN1_HUMAN Isoform 12 of Intersectin-1 OS=Homo sapiens GN=ITSN1;>sp|Q15811-11|ITSN1_HUMAN Isoform 11 of Intersectin-1 OS=Homo sapiens GN=ITSN1;>sp|Q15811-3|ITSN1_HUMAN Isoform 3 of Intersectin-1 OS=Homo sapiens GN=ITSN1;>tr|F8W7U0|F8W7U0_HUM	16	2	2	2	2	2	2	2	1	1	2	2	2	2	1	1	2	2	2	2	1	1	1.9	1.9	1.9	125.92	1107	1107;1112;1144;1149;1178;1215;1220;1650;1660;1716;1721;1721;914;1015;1020;1222	6.55					2	2	6	1			2	2	2
E9PDF6;O43795;E7EPB4;E7EQD9;H7C2Y7;C9JYW1;C9JUP5	E9PDF6;O43795	37;37;15;8;7;3;2	37;37;15;8;7;3;2	2;2;2;0;0;0;0	Unconventional myosin-Ib	MYO1B	>tr|E9PDF6|E9PDF6_HUMAN Unconventional myosin-Ib OS=Homo sapiens GN=MYO1B PE=1 SV=1;>sp|O43795|MYO1B_HUMAN Unconventional myosin-Ib OS=Homo sapiens GN=MYO1B PE=1 SV=3	7	37	37	2	35	34	35	36	33	34	35	34	35	36	33	34	2	2	2	2	2	2	38	38	2.7	128.48	1107	1107;1136;381;303;192;163;149	6.13	6	25	49	63	53	53	69	92	36	40	82	80	95
O00515;E9PDI4;H0Y901	O00515;E9PDI4	13;13;3	13;13;3	13;13;3	Ladinin-1	LAD1	>sp|O00515|LAD1_HUMAN Ladinin-1 OS=Homo sapiens GN=LAD1 PE=1 SV=2;>tr|E9PDI4|E9PDI4_HUMAN Ladinin-1 OS=Homo sapiens GN=LAD1 PE=1 SV=1	3	13	13	13	11	10	10	10	11	10	11	10	10	10	11	10	11	10	10	10	11	10	25.1	25.1	25.1	57.13	517	517;531;192	6.21	9	14	8	2	8	9	24	36	15	6	21	20	22
E9PDM8;O94855;O94855-2;E9PC44	E9PDM8;O94855;O94855-2;E9PC44	8;8;8;7	8;8;8;7	8;8;8;7	Protein transport protein Sec24D	SEC24D	>tr|E9PDM8|E9PDM8_HUMAN Protein transport protein Sec24D OS=Homo sapiens GN=SEC24D PE=1 SV=1;>sp|O94855|SC24D_HUMAN Protein transport protein Sec24D OS=Homo sapiens GN=SEC24D PE=1 SV=2;>sp|O94855-2|SC24D_HUMAN Isoform 2 of Protein transport protein Sec24D	4	8	8	8	4	4	8	8	6	7	4	4	8	8	6	7	4	4	8	8	6	7	13.4	13.4	13.4	74.953	663	663;1032;1033;393	7				6	8	8	10	8	5	8	7	8	11
E9PDU5;Q9NNW5;E9PBK6	E9PDU5;Q9NNW5;E9PBK6	5;5;3	5;5;3	5;5;3	WD repeat-containing protein 6	WDR6	>tr|E9PDU5|E9PDU5_HUMAN WD repeat-containing protein 6 OS=Homo sapiens GN=WDR6 PE=4 SV=1;>sp|Q9NNW5|WDR6_HUMAN WD repeat-containing protein 6 OS=Homo sapiens GN=WDR6 PE=1 SV=1;>tr|E9PBK6|E9PBK6_HUMAN WD repeat-containing protein 6 OS=Homo sapiens GN=WDR6 P	3	5	5	5	4	4	4	5	5	5	4	4	4	5	5	5	4	4	4	5	5	5	5.3	5.3	5.3	116.17	1070	1070;1121;569	9.18								4	20	10	5	6	4
E9PE17;Q9Y2R5;I3L0E3	E9PE17;Q9Y2R5;I3L0E3	4;4;4	4;4;4	4;4;4	28S ribosomal protein S17, mitochondrial	MRPS17	>tr|E9PE17|E9PE17_HUMAN 28S ribosomal protein S17, mitochondrial (Fragment) OS=Homo sapiens GN=MRPS17 PE=3 SV=1;>sp|Q9Y2R5|RT17_HUMAN 28S ribosomal protein S17, mitochondrial OS=Homo sapiens GN=MRPS17 PE=2 SV=1;>tr|I3L0E3|I3L0E3_HUMAN 28S ribosomal protein	3	4	4	4	3	3	4	3	3	3	3	3	4	3	3	3	3	3	4	3	3	3	51.9	51.9	51.9	14.374	129	129;130;225	6			6	6		5	4	7	4		6	5	5
E9PE20;P49458-2	E9PE20;P49458-2	3;2	1;0	1;0		SRP9	>tr|E9PE20|E9PE20_HUMAN Signal recognition particle 9 kDa protein OS=Homo sapiens GN=SRP9 PE=1 SV=1;>sp|P49458-2|SRP09_HUMAN Isoform 2 of Signal recognition particle 9 kDa protein OS=Homo sapiens GN=SRP9	2	3	1	1	3	3	3	3	3	3	1	1	1	1	1	1	1	1	1	1	1	1	53	24.2	24.2	7.6677	66	66;82	4				6							1	1	1
E9PE82;P16219	E9PE82;P16219	10;10	10;10	10;10	Short-chain specific acyl-CoA dehydrogenase, mitochondrial	ACADS	>tr|E9PE82|E9PE82_HUMAN Short-chain-specific acyl-CoA dehydrogenase, mitochondrial OS=Homo sapiens GN=ACADS PE=1 SV=1;>sp|P16219|ACADS_HUMAN Short-chain specific acyl-CoA dehydrogenase, mitochondrial OS=Homo sapiens GN=ACADS PE=1 SV=1	2	10	10	10	8	8	7	8	5	8	8	8	7	8	5	8	8	8	7	8	5	8	26	26	26	44.012	408	408;412	6.09		6	6	3	15	7	2	20	1	6	15	13	14
P18564-2;E9PEE8;P18564	P18564-2;E9PEE8;P18564	3;3;3	3;3;3	3;3;3	Integrin beta;Integrin beta-6	ITGB6	>sp|P18564-2|ITB6_HUMAN Isoform 2 of Integrin beta-6 OS=Homo sapiens GN=ITGB6;>tr|E9PEE8|E9PEE8_HUMAN Integrin beta OS=Homo sapiens GN=ITGB6 PE=3 SV=1;>sp|P18564|ITB6_HUMAN Integrin beta-6 OS=Homo sapiens GN=ITGB6 PE=1 SV=2	3	3	3	3	3	3	2	3	2	3	3	3	2	3	2	3	3	3	2	3	2	3	5.1	5.1	5.1	74.957	681	681;746;788	7.7				2	5	6	6	1	4	13	7	7	5
H0Y547;P98196;E9PEJ6;H0Y8F0	H0Y547;P98196;E9PEJ6	10;10;10;3	10;10;10;3	9;9;9;3	Probable phospholipid-transporting ATPase IH	ATP11A	>tr|H0Y547|H0Y547_HUMAN Probable phospholipid-transporting ATPase IH (Fragment) OS=Homo sapiens GN=ATP11A PE=1 SV=1;>sp|P98196|AT11A_HUMAN Probable phospholipid-transporting ATPase IH OS=Homo sapiens GN=ATP11A PE=1 SV=3;>tr|E9PEJ6|E9PEJ6_HUMAN Probable pho	4	10	10	9	7	8	8	8	8	6	7	8	8	8	8	6	6	7	7	7	7	5	10.8	10.8	10.1	106.51	935	935;1134;1191;352	4.94	4	10	10	7	6	10	3	7	8		13	12	9
Q9UIA9;E9PEN8;E7ESC6;E5RIW1;H0YBE1	Q9UIA9;E9PEN8;E7ESC6	35;35;34;11;6	35;35;34;11;6	34;34;33;11;6	Exportin-7	XPO7	>sp|Q9UIA9|XPO7_HUMAN Exportin-7 OS=Homo sapiens GN=XPO7 PE=1 SV=3;>tr|E9PEN8|E9PEN8_HUMAN Exportin-7 OS=Homo sapiens GN=XPO7 PE=1 SV=1;>tr|E7ESC6|E7ESC6_HUMAN Exportin-7 OS=Homo sapiens GN=XPO7 PE=1 SV=1	5	35	35	34	32	32	28	34	29	30	32	32	28	34	29	30	31	31	28	33	28	29	37	37	36	123.91	1087	1087;1096;1088;237;190	6.32	8	30	39	13	15	30	43	38	66	25	50	49	57
Q9Y496;J3KPF9;E9PES4;C9J9X2;H7C2F6;Q5JRK0;E2QRG3;H0Y718;F6VGH2;Q6ZMV9-3;E7EUN7;Q6ZMV9	Q9Y496;J3KPF9;E9PES4	12;12;12;4;2;1;1;1;1;1;1;1	11;11;11;4;2;0;0;0;0;0;0;0	10;10;10;4;2;0;0;0;0;0;0;0	Kinesin-like protein KIF3A	KIF3A	>sp|Q9Y496|KIF3A_HUMAN Kinesin-like protein KIF3A OS=Homo sapiens GN=KIF3A PE=1 SV=4;>tr|J3KPF9|J3KPF9_HUMAN Kinesin-like protein KIF3A OS=Homo sapiens GN=KIF3A PE=1 SV=1;>tr|E9PES4|E9PES4_HUMAN Kinesin-like protein KIF3A OS=Homo sapiens GN=KIF3A PE=1 SV=1	12	12	11	10	8	9	9	10	7	8	7	8	8	9	6	7	6	7	7	8	5	6	21	19.5	17.6	80.04	699	699;702;726;169;185;161;653;689;758;797;797;814	3.94	10	9	5	8	10	7		2		3	8	8	12
E9PF10;O75694;O75694-2;D6RA13	E9PF10;O75694;O75694-2	26;26;25;1	26;26;25;1	26;26;25;1	Nuclear pore complex protein Nup155	NUP155	>tr|E9PF10|E9PF10_HUMAN Nuclear pore complex protein Nup155 OS=Homo sapiens GN=NUP155 PE=1 SV=1;>sp|O75694|NU155_HUMAN Nuclear pore complex protein Nup155 OS=Homo sapiens GN=NUP155 PE=1 SV=1;>sp|O75694-2|NU155_HUMAN Isoform 2 of Nuclear pore complex protei	4	26	26	26	21	21	20	20	24	25	21	21	20	20	24	25	21	21	20	20	24	25	24.3	24.3	24.3	148.09	1327	1327;1391;1332;54	5.66	15	32	18	6	21	15	11	22	34	17	30	31	29
E9PF19;Q9Y4P3;C9JVF0;F8WCR3;F8WDI9	E9PF19;Q9Y4P3	20;20;7;1;1	20;20;7;1;1	20;20;7;1;1	Transducin beta-like protein 2	TBL2	>tr|E9PF19|E9PF19_HUMAN Transducin beta-like protein 2 OS=Homo sapiens GN=TBL2 PE=1 SV=1;>sp|Q9Y4P3|TBL2_HUMAN Transducin beta-like protein 2 OS=Homo sapiens GN=TBL2 PE=1 SV=1	5	20	20	20	20	19	16	17	16	16	20	19	16	17	16	16	20	19	16	17	16	16	59.4	59.4	59.4	45.935	411	411;447;270;107;176	4.98	15	53	19	19	11	22	34	23	13	12	40	39	35
H0Y621;Q9Y282;Q9Y282-3;H7BXI5;H0Y5K5;E9PFA8;Q9Y282-2;H0Y802;H0Y6Z0	H0Y621;Q9Y282;Q9Y282-3;H7BXI5;H0Y5K5;E9PFA8;Q9Y282-2	5;5;5;5;5;5;3;2;2	5;5;5;5;5;5;3;2;2	5;5;5;5;5;5;3;2;2	Endoplasmic reticulum-Golgi intermediate compartment protein 3	ERGIC3	>tr|H0Y621|H0Y621_HUMAN Endoplasmic reticulum-Golgi intermediate compartment protein 3 (Fragment) OS=Homo sapiens GN=ERGIC3 PE=1 SV=1;>sp|Q9Y282|ERGI3_HUMAN Endoplasmic reticulum-Golgi intermediate compartment protein 3 OS=Homo sapiens GN=ERGIC3 PE=1 SV=1;	9	5	5	5	4	4	4	4	4	4	4	4	4	4	4	4	4	4	4	4	4	4	17.2	17.2	17.2	36.851	326	326;383;388;388;397;398;230;130;157	6.05	2		10	6			23	16			9	9	9
Q9H334-4;Q9H334-7;Q9H334;E9PFD3;C9IYY1;C9J5T4;Q9H334-2;G5E965;H0Y882;Q9H334-3;Q9H334-6;C9J0F0	Q9H334-4;Q9H334-7;Q9H334;E9PFD3;C9IYY1;C9J5T4;Q9H334-2;G5E965;H0Y882;Q9H334-3;Q9H334-6;C9J0F0	2;2;2;2;1;1;1;1;1;1;1;1	2;2;2;2;1;1;1;1;1;1;1;1	2;2;2;2;1;1;1;1;1;1;1;1	Forkhead box protein P1	FOXP1	>sp|Q9H334-4|FOXP1_HUMAN Isoform 4 of Forkhead box protein P1 OS=Homo sapiens GN=FOXP1;>sp|Q9H334-7|FOXP1_HUMAN Isoform 7 of Forkhead box protein P1 OS=Homo sapiens GN=FOXP1;>sp|Q9H334|FOXP1_HUMAN Forkhead box protein P1 OS=Homo sapiens GN=FOXP1 PE=1 SV=1;	12	2	2	2	1	0	0	1	1	2	1	0	0	1	1	2	1	0	0	1	1	2	3.9	3.9	3.9	74.329	662	662;676;677;679;123;224;489;566;573;586;601;613	5					5						1
E9PFK5;P78316-2;P78316	E9PFK5;P78316-2;P78316	5;5;5	5;5;5	5;5;5	Nucleolar protein 14	NOP14	>tr|E9PFK5|E9PFK5_HUMAN Nucleolar protein 14 OS=Homo sapiens GN=NOP14 PE=1 SV=1;>sp|P78316-2|NOP14_HUMAN Isoform 2 of Nucleolar protein 14 OS=Homo sapiens GN=NOP14;>sp|P78316|NOP14_HUMAN Nucleolar protein 14 OS=Homo sapiens GN=NOP14 PE=1 SV=3	3	5	5	5	4	4	4	4	4	4	4	4	4	4	4	4	4	4	4	4	4	4	6.3	6.3	6.3	88.865	788	788;806;857	5.16		12	1				6			6	4	4	4
P57721-5;E9PFP8;P57721-4;P57721;J3QT27;P57721-2;P57721-3	P57721-5;E9PFP8;P57721-4;P57721;J3QT27;P57721-2;P57721-3	7;7;7;7;6;6;6	1;1;1;1;1;1;1	1;1;1;1;1;1;1	Poly(rC)-binding protein 3	PCBP3	>sp|P57721-5|PCBP3_HUMAN Isoform 5 of Poly(rC)-binding protein 3 OS=Homo sapiens GN=PCBP3;>tr|E9PFP8|E9PFP8_HUMAN Poly(rC)-binding protein 3 OS=Homo sapiens GN=PCBP3 PE=4 SV=1;>sp|P57721-4|PCBP3_HUMAN Isoform 4 of Poly(rC)-binding protein 3 OS=Homo sapiens	7	7	1	1	7	7	7	7	7	7	1	1	1	1	1	1	1	1	1	1	1	1	23.1	2.3	2.3	37.341	351	351;361;370;371;322;345;346	6.09					2	6	3				1	2	2
E9PGF6;E9PFQ4;Q86SQ0-2;Q86SQ0-3;Q86SQ0;G5E9V3	E9PGF6;E9PFQ4;Q86SQ0-2;Q86SQ0-3;Q86SQ0;G5E9V3	3;3;3;3;3;2	3;3;3;3;3;2	3;3;3;3;3;2	Pleckstrin homology-like domain family B member 2	PHLDB2	>tr|E9PGF6|E9PGF6_HUMAN Uncharacterized protein OS=Homo sapiens GN=PHLDB2 PE=1 SV=1;>tr|E9PFQ4|E9PFQ4_HUMAN Pleckstrin homology-like domain family B member 2 (Fragment) OS=Homo sapiens GN=PHLDB2 PE=1 SV=1;>sp|Q86SQ0-2|PHLB2_HUMAN Isoform 2 of Pleckstrin ho	6	3	3	3	3	2	3	3	2	3	3	2	3	3	2	3	3	2	3	3	2	3	4.6	4.6	4.6	86.647	744	744;1115;1210;1237;1253;581	3.96	5	3	5	1		5	5				3	2	5
Q14738-2;E9PFR3;Q14738;Q14738-3;H0Y8C4;H7C5Q9	Q14738-2;E9PFR3;Q14738;Q14738-3;H0Y8C4	16;16;16;14;13;6	16;16;16;14;13;6	12;12;12;10;9;3	Serine/threonine-protein phosphatase 2A 56 kDa regulatory subunit delta isoform	PPP2R5D	>sp|Q14738-2|2A5D_HUMAN Isoform Delta-2 of Serine/threonine-protein phosphatase 2A 56 kDa regulatory subunit delta isoform OS=Homo sapiens GN=PPP2R5D;>tr|E9PFR3|E9PFR3_HUMAN Serine/threonine-protein phosphatase 2A 56 kDa regulatory subunit delta isoform OS	6	16	16	12	15	14	12	13	14	11	15	14	12	13	14	11	11	10	9	10	11	7	33.7	33.7	25.3	66.18	570	570;594;602;496;504;154	6.02	2	19	18	13	10	30	37	22	14	14	30	32	33
Q96CW1-2;Q96CW1;E9PFW3;C9JJ47;C9JTK4;C9JGT8;C9JJD3;C9JPV8;H7C4C3	Q96CW1-2;Q96CW1;E9PFW3;C9JJ47	16;16;16;10;7;7;6;6;2	16;16;16;10;7;7;6;6;2	16;16;16;10;7;7;6;6;2	AP-2 complex subunit mu	AP2M1	>sp|Q96CW1-2|AP2M1_HUMAN Isoform 2 of AP-2 complex subunit mu OS=Homo sapiens GN=AP2M1;>sp|Q96CW1|AP2M1_HUMAN AP-2 complex subunit mu OS=Homo sapiens GN=AP2M1 PE=1 SV=2;>tr|E9PFW3|E9PFW3_HUMAN AP-2 complex subunit mu OS=Homo sapiens GN=AP2M1 PE=1 SV=1;>tr|	9	16	16	16	16	13	13	14	15	14	16	13	13	14	15	14	16	13	13	14	15	14	45.3	45.3	45.3	49.389	433	433;435;460;252;160;195;113;136;122	5.91	4	36	14	14	20	21	11	23	20	30	35	33	30
F8WF91;E9PG22;Q8IW35;Q8IW35-2	F8WF91;E9PG22;Q8IW35;Q8IW35-2	1;1;1;1	1;1;1;1	1;1;1;1	Centrosomal protein of 97 kDa	CEP97	>tr|F8WF91|F8WF91_HUMAN Centrosomal protein of 97 kDa OS=Homo sapiens GN=CEP97 PE=4 SV=1;>tr|E9PG22|E9PG22_HUMAN Centrosomal protein of 97 kDa OS=Homo sapiens GN=CEP97 PE=1 SV=1;>sp|Q8IW35|CEP97_HUMAN Centrosomal protein of 97 kDa OS=Homo sapiens GN=CEP97	4	1	1	1	0	0	1	1	0	0	0	0	1	1	0	0	0	0	1	1	0	0	7.8	7.8	7.8	13.963	128	128;806;865;891	10										2			1
E9PG40;P05067-7;P05067-11;P05067-8;P05067-9;P05067;H7C0V9;P05067-10;E9PEV0;P05067-3;P05067-4;P05067-5;P05067-6;H7C104;P05067-2;H7C2L2	E9PG40;P05067-7;P05067-11;P05067-8;P05067-9;P05067;H7C0V9;P05067-10;E9PEV0;P05067-3;P05067-4;P05067-5;P05067-6;H7C104	10;10;10;10;10;10;9;9;9;9;9;9;9;5;3;2	10;10;10;10;10;10;9;9;9;9;9;9;9;5;3;2	10;10;10;10;10;10;9;9;9;9;9;9;9;5;3;2	Amyloid beta A4 protein;N-APP;Soluble APP-alpha;Soluble APP-beta;C99;Beta-amyloid protein 42;Beta-amyloid protein 40;C83;P3(42);P3(40);C80;Gamma-secretase C-terminal fragment 59;Gamma-secretase C-terminal fragment 57;Gamma-secretase C-terminal fragment 50;C31	APP	>tr|E9PG40|E9PG40_HUMAN Gamma-secretase C-terminal fragment 59 OS=Homo sapiens GN=APP PE=1 SV=1;>sp|P05067-7|A4_HUMAN Isoform L-APP733 of Amyloid beta A4 protein OS=Homo sapiens GN=APP;>sp|P05067-11|A4_HUMAN Isoform 11 of Amyloid beta A4 protein OS=Homo sa	16	10	10	10	10	9	10	10	10	9	10	9	10	10	10	9	10	9	10	10	10	9	16.5	16.5	16.5	80.832	714	714;733;746;751;752;770;485;639;660;677;695;696;714;280;305;181	4.84	12	13	19	17	9	8	1	6	23	1	19	18	18
Q15262;Q15262-2;Q15262-3;F5GXI4;Q5TG12;Q15262-4;E9PGC5;H0Y6V4;H0Y6P5;H0YDP9;E7EVX9;E7EPS8;P28827;P28827-2;F8WA38	Q15262;Q15262-2;Q15262-3;F5GXI4;Q5TG12;Q15262-4;E9PGC5	11;11;11;11;11;11;11;3;3;2;1;1;1;1;1	11;11;11;11;11;11;11;3;3;2;1;1;1;1;1	11;11;11;11;11;11;11;3;3;2;1;1;1;1;1	Receptor-type tyrosine-protein phosphatase kappa	PTPRK	>sp|Q15262|PTPRK_HUMAN Receptor-type tyrosine-protein phosphatase kappa OS=Homo sapiens GN=PTPRK PE=1 SV=2;>sp|Q15262-2|PTPRK_HUMAN Isoform 2 of Receptor-type tyrosine-protein phosphatase kappa OS=Homo sapiens GN=PTPRK;>sp|Q15262-3|PTPRK_HUMAN Isoform 3 of	15	11	11	11	7	7	7	9	9	7	7	7	7	9	9	7	7	7	7	9	9	7	10.3	10.3	10.3	162.1	1439	1439;1440;1446;1457;1458;1462;1472;260;343;204;1239;1390;1452;1465;1466	5.73	2	1	5	12	8	14	7		6	5	10	9	9
H7C5A5;Q9P246;H0Y860;F5GXJ4;E9PGD0;H7C5K2;R4GNC5;R4GN82;R4GMP0;H7C5C6	H7C5A5;Q9P246;H0Y860;F5GXJ4;E9PGD0;H7C5K2	3;3;3;3;3;2;1;1;1;1	2;2;2;2;2;1;1;1;1;1	2;2;2;2;2;1;1;1;1;1	Stromal interaction molecule 2	STIM2	>tr|H7C5A5|H7C5A5_HUMAN Stromal interaction molecule 2 OS=Homo sapiens GN=STIM2 PE=4 SV=1;>sp|Q9P246|STIM2_HUMAN Stromal interaction molecule 2 OS=Homo sapiens GN=STIM2 PE=1 SV=2;>tr|H0Y860|H0Y860_HUMAN Stromal interaction molecule 2 OS=Homo sapiens GN=STI	10	3	2	2	3	3	2	3	3	3	2	2	1	2	2	2	2	2	1	2	2	2	6.2	3.5	3.5	68.007	599	599;746;754;833;841;347;87;159;214;221	7.38						5		6	2		3	3	1
E9PGM4;Q04446	E9PGM4;Q04446	8;8	8;8	8;8	1,4-alpha-glucan-branching enzyme	GBE1	>tr|E9PGM4|E9PGM4_HUMAN 1,4-alpha-glucan-branching enzyme OS=Homo sapiens GN=GBE1 PE=1 SV=1;>sp|Q04446|GLGB_HUMAN 1,4-alpha-glucan-branching enzyme OS=Homo sapiens GN=GBE1 PE=1 SV=3	2	8	8	8	7	8	5	5	5	5	7	8	5	5	5	5	7	8	5	5	5	5	15.1	15.1	15.1	75.959	661	661;702	3.92	6	9	4	4	1	6	4	3			7	8	6
E9PGT1;Q15631;H7C1D4;Q15631-2	E9PGT1;Q15631;H7C1D4;Q15631-2	12;12;10;7	12;12;10;7	12;12;10;7	Translin	TSN	>tr|E9PGT1|E9PGT1_HUMAN Translin OS=Homo sapiens GN=TSN PE=1 SV=1;>sp|Q15631|TSN_HUMAN Translin OS=Homo sapiens GN=TSN PE=1 SV=1;>tr|H7C1D4|H7C1D4_HUMAN Translin (Fragment) OS=Homo sapiens GN=TSN PE=1 SV=1;>sp|Q15631-2|TSN_HUMAN Isoform 2 of Translin OS=Ho	4	12	12	12	12	12	12	12	11	12	12	12	12	12	11	12	12	12	12	12	11	12	47.1	47.1	47.1	25.572	223	223;228;185;148	4.08	6	41	56	23					30	3	26	25	29
E9PRI4;E9PGT3;Q15418;Q15418-2;Q15418-3;E9PAN7;Q5SVM6;E9PMM7;Q5SVM7	E9PRI4;E9PGT3;Q15418;Q15418-2;Q15418-3	25;25;25;25;22;7;6;5;4	18;18;18;18;16;3;5;1;3	17;17;17;17;15;3;4;1;3	Ribosomal protein S6 kinase;Ribosomal protein S6 kinase alpha-1	RPS6KA1	>tr|E9PRI4|E9PRI4_HUMAN Ribosomal protein S6 kinase OS=Homo sapiens GN=RPS6KA1 PE=1 SV=1;>tr|E9PGT3|E9PGT3_HUMAN Ribosomal protein S6 kinase OS=Homo sapiens GN=RPS6KA1 PE=1 SV=1;>sp|Q15418|KS6A1_HUMAN Ribosomal protein S6 kinase alpha-1 OS=Homo sapiens GN=	9	25	18	17	24	25	21	21	21	23	17	18	15	15	15	16	16	17	14	14	14	15	42.7	32.8	31.3	81.146	719	719;724;735;744;643;204;166;112;115	5.52	1	16	31	39	38	27	10	17	41	1	38	40	34
Q99627-2;E9PGT6;Q99627;H7C3S9;B8ZZP3	Q99627-2;E9PGT6;Q99627;H7C3S9;B8ZZP3	4;4;4;3;3	4;4;4;3;3	4;4;4;3;3	COP9 signalosome complex subunit 8	COPS8	>sp|Q99627-2|CSN8_HUMAN Isoform 2 of COP9 signalosome complex subunit 8 OS=Homo sapiens GN=COPS8;>tr|E9PGT6|E9PGT6_HUMAN COP9 signalosome complex subunit 8 OS=Homo sapiens GN=COPS8 PE=1 SV=1;>sp|Q99627|CSN8_HUMAN COP9 signalosome complex subunit 8 OS=Homo	5	4	4	4	4	4	4	4	4	4	4	4	4	4	4	4	4	4	4	4	4	4	39.4	39.4	39.4	17.909	160	160;173;209;83;206	5.78		4	4		1	18	6	7			7	7	7
[truncated: 5,101 more rows]
[truncated: 48 more columns]
